# Supplementary material for: A combinatorial approach to improving the performance of azoarene photoswitches
Source: PubMed Central journal article supplement (PMC6880842; doi:10.3762/bjoc.15.266), 2019-11-14
Supplement: Beilstein_J_Org_Chem-15-2753-s001.pdf [file Beilstein_J_Org_Chem-15-2753-s001.pdf]

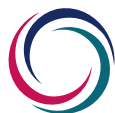

## Supporting Information

for

### **A combinatorial approach to improving the performance of azoarene photoswitches**

Joaquin Calbo, Aditya R. Thawani, Rosina S. L. Gibson, Andrew J. P. White  
and Matthew J. Fuchter

*Beilstein J. Org. Chem.* **2019**, *15*, 2753–2764. [doi:10.3762/bjoc.15.266](https://doi.org/10.3762/bjoc.15.266)

**Theoretical calculations, synthetic methods, experimental  
characterization and X-ray crystallography data**

## Additional theoretical data

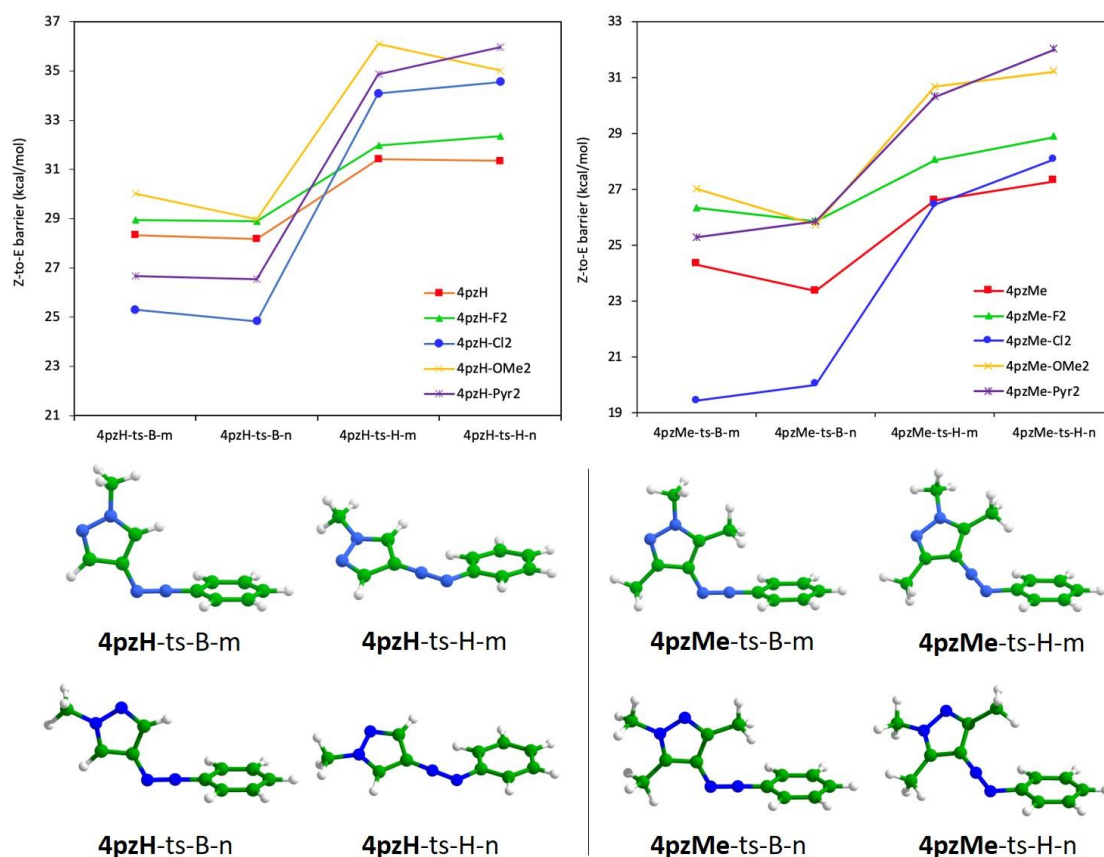

**Figure S1:** Free-energy barriers calculated for the *Z*–*E* thermal isomerization process in the different pathways considering all possible conformers. Representative transition-state geometries for **4pzH** and **4pzMe** photoswitches are displayed (bottom). “B” and “H” refer to transition states in which the azo N atom is inverted adjacent to the benzene (B) or the heteroring (H) moiety, respectively. The “m” and “n” labels refer to the relative orientation of the heteroring with respect to the benzene moiety: *N*-methyl “m” or =N– atom “n” close to the benzene ring.

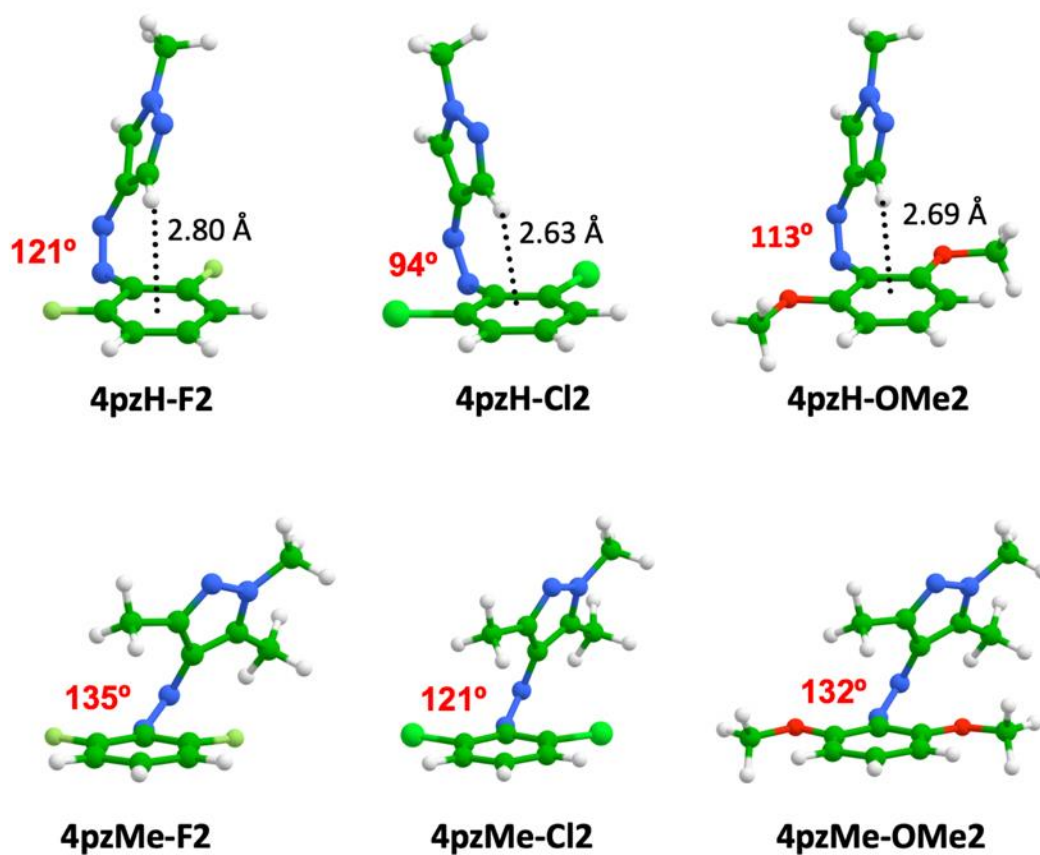

**Figure S2:** Minimum-energy structure calculated at the PBE0-D3/6-31G\*\* level of theory for representative T-shaped and twisted *Z*-isomers of *ortho*-substituted **4pzH-X** and **4pzMe-X** photoswitches, respectively. Short CH... $\pi$  distances and tilting dihedral angle  $\theta$  as defined in Figure 3 are shown.

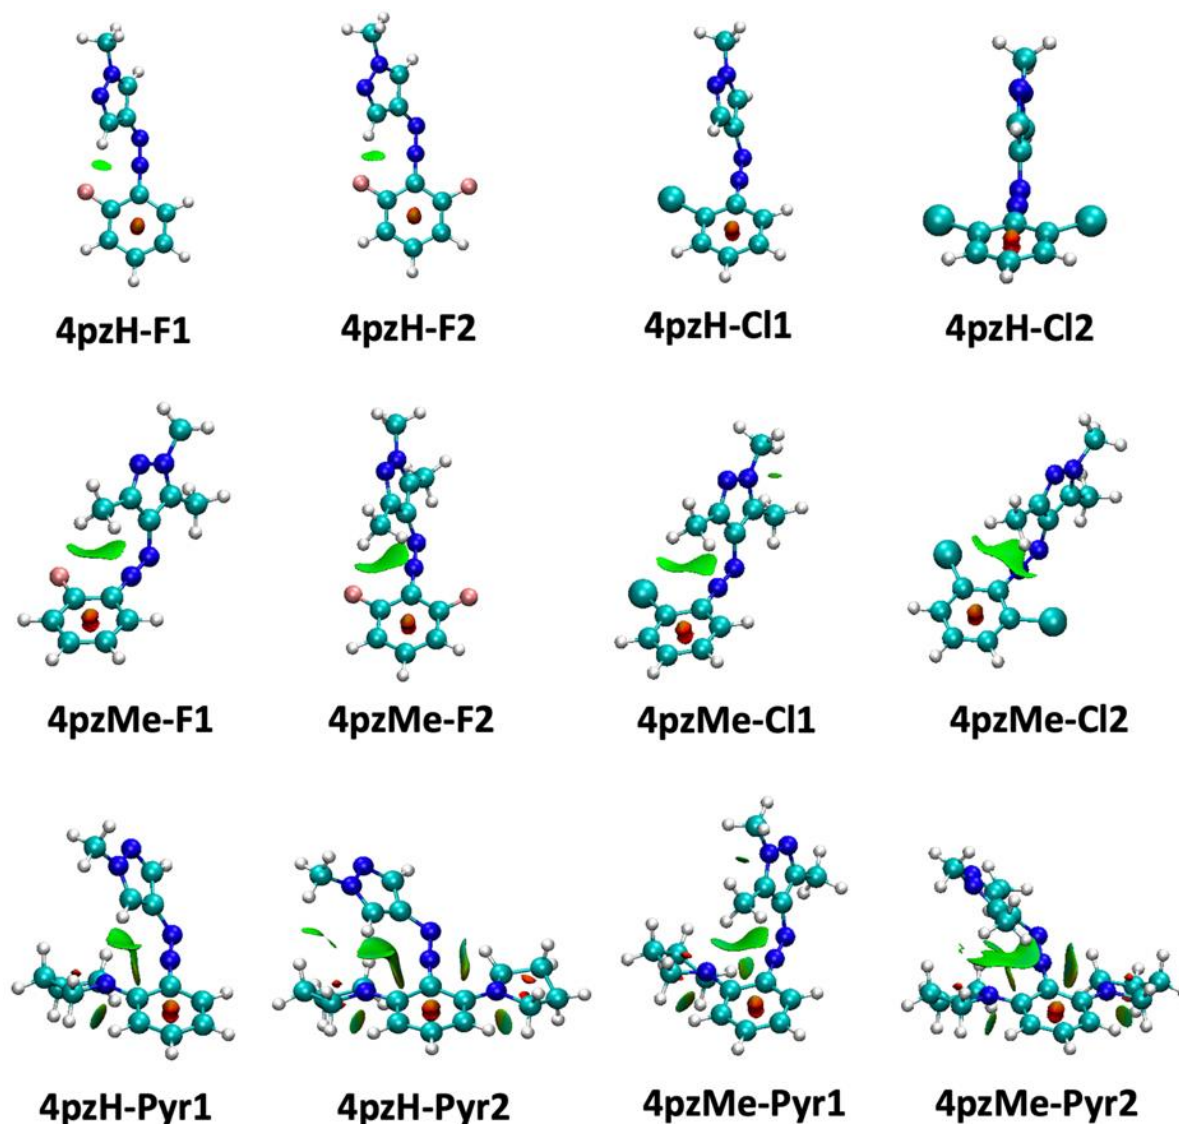

**Figure S3.** Non-covalent index (NCI) surfaces calculated for representative *ortho*-substituted arylazopyrazoles at the lowest-lying transition-state geometry.

Our previous studies reported a reasonably good correlation between the strength of the N=N azo bond and the half-life time in *Z*-arylazopyrazoles [1]. Thus, analysis of the Wiberg index of the N=N bond was demonstrated to be a diagnostic tool for predicting *Z*-isomer half-life in the heteroarylazo switches. The Wiberg index directly correlates with the azo bond strength and thus with the N=N distance (Figure S4).

However, a quick inspection of the relationship between the computed Wiberg indexes and the theoretical  $t_{1/2}$  (Figure S5) for these *ortho*-substituted derivatives, suggests a weaker correlation for our new arylazopyrazoles. The pyrrolidine-substituted photoswitches were the largest outliers and so were removed from the comparison, resulting in an improved correlation between Wiberg index and  $t_{1/2}$  (Figure S6). Nonetheless, for the halogen-substituted photoswitches, similar Wiberg indexes are computed (1.837, 1.838, 1.834 and 1.822 for **4pzH-F2**, **4pzH-Cl2**, **4pzMe-F2** and **4pzMe-Cl2**, respectively) whereas very large differences in half-life times are predicted (from 5 days in **4pzH-Cl2** to ca. 4000 days in **4pzH-F2**, or from 2 minutes in **4pzMe-Cl2** to 26 days in **4pzMe-F2**). Thus, it would seem that *ortho*-benzene substitution presents a limitation with respect to the use of the Wiberg index as a parameter to estimate the *Z*-isomer half-life.

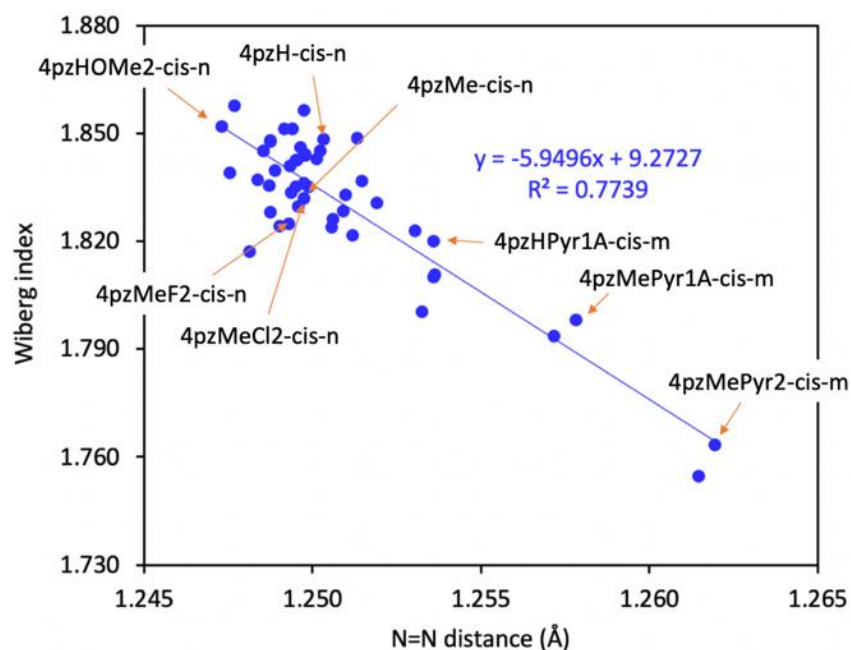

**Figure S4:** Relationship between the Wiberg index and the azo N=N distance for all the conformers studied.

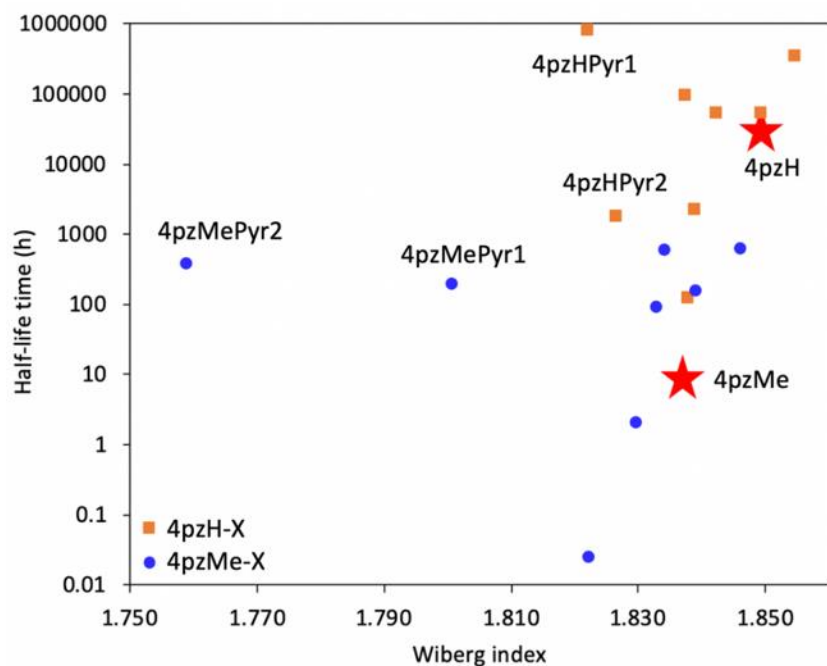

**Figure S5:** Relationship between the theoretical half-life time and the Wiberg index for the list of photoswitches under study in this paper.

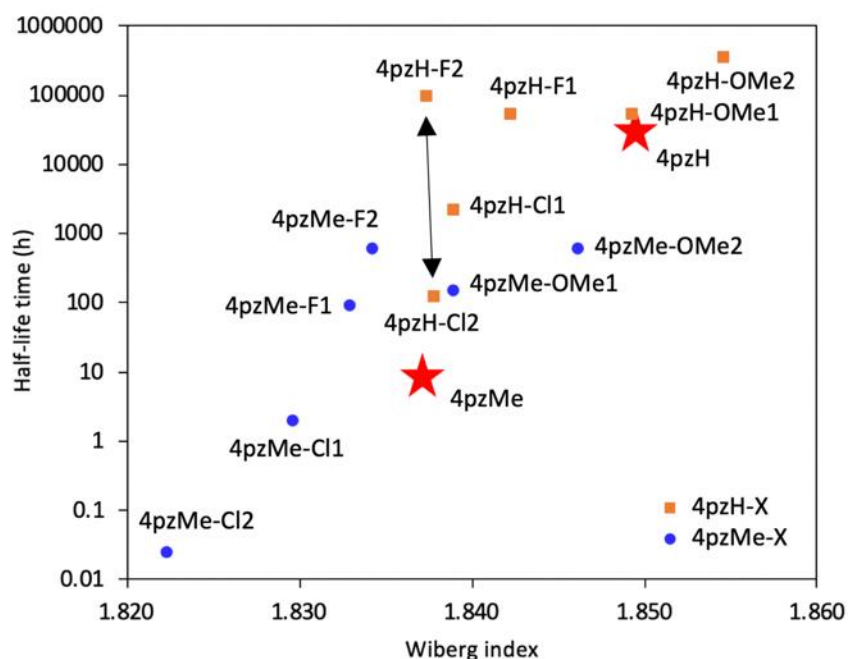

**Figure S6:** Relationship between the theoretical half-life time and the Wiberg index for the list of photoswitches under study in this paper excluding the pyrrolidine-based derivatives.

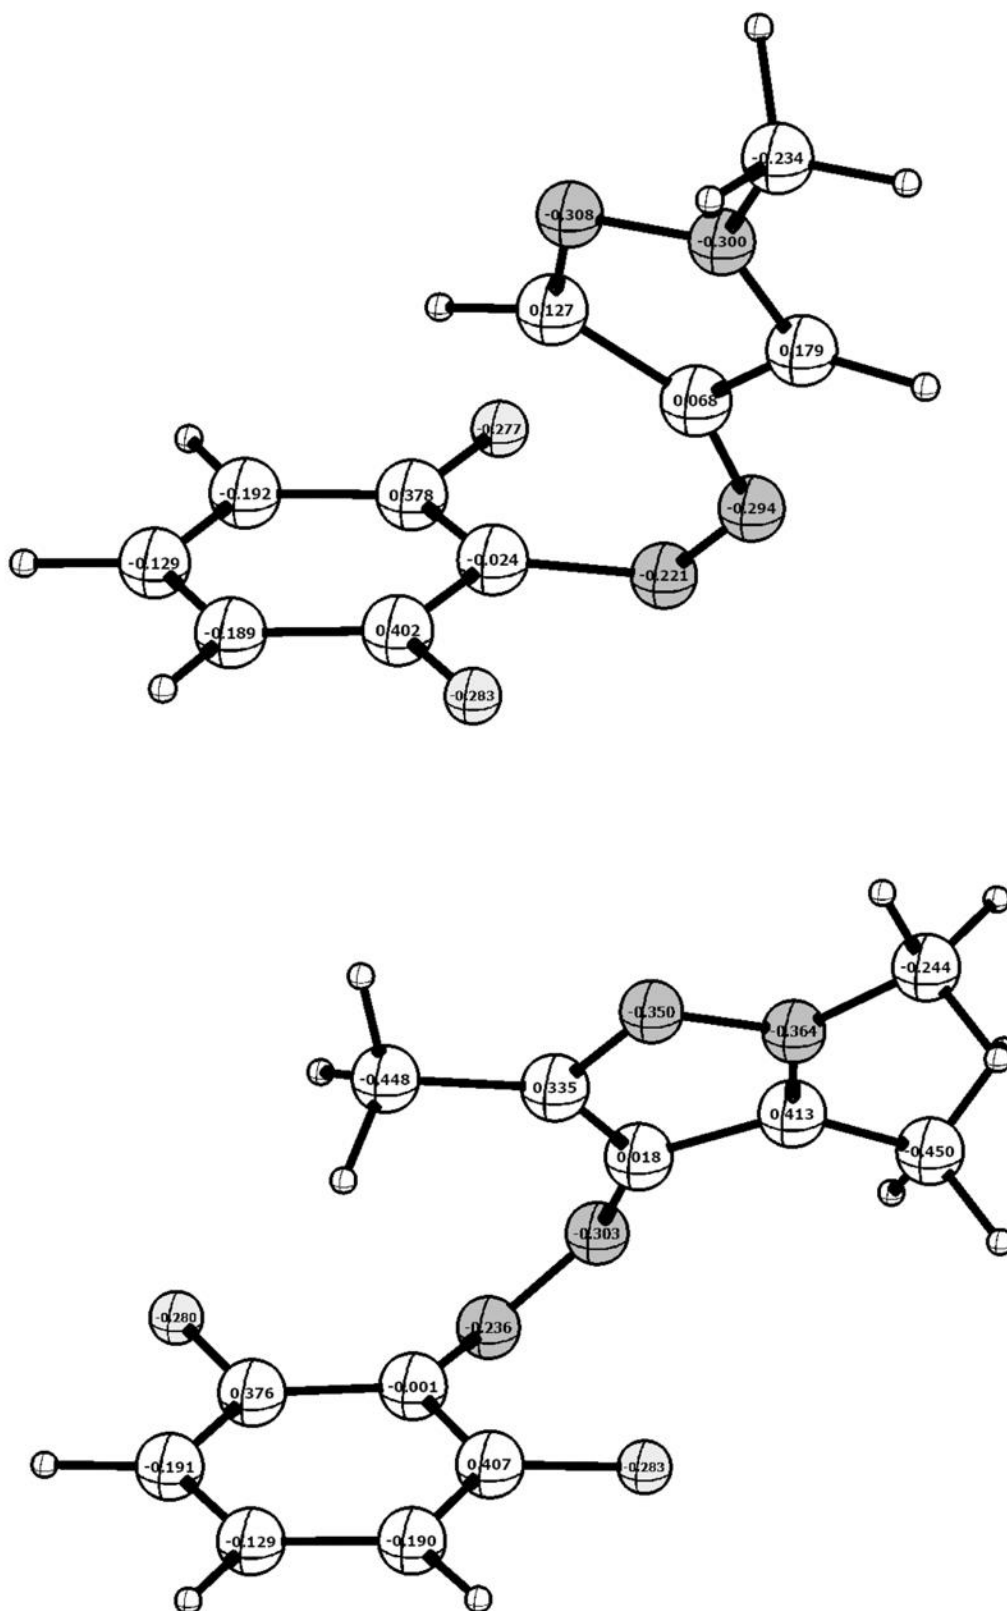

**Figure S7:** Atomic charges calculated for the Z-isomer minimum-energy geometry of **4pzH-F2** (top) and **4pzMe-F2** (bottom).

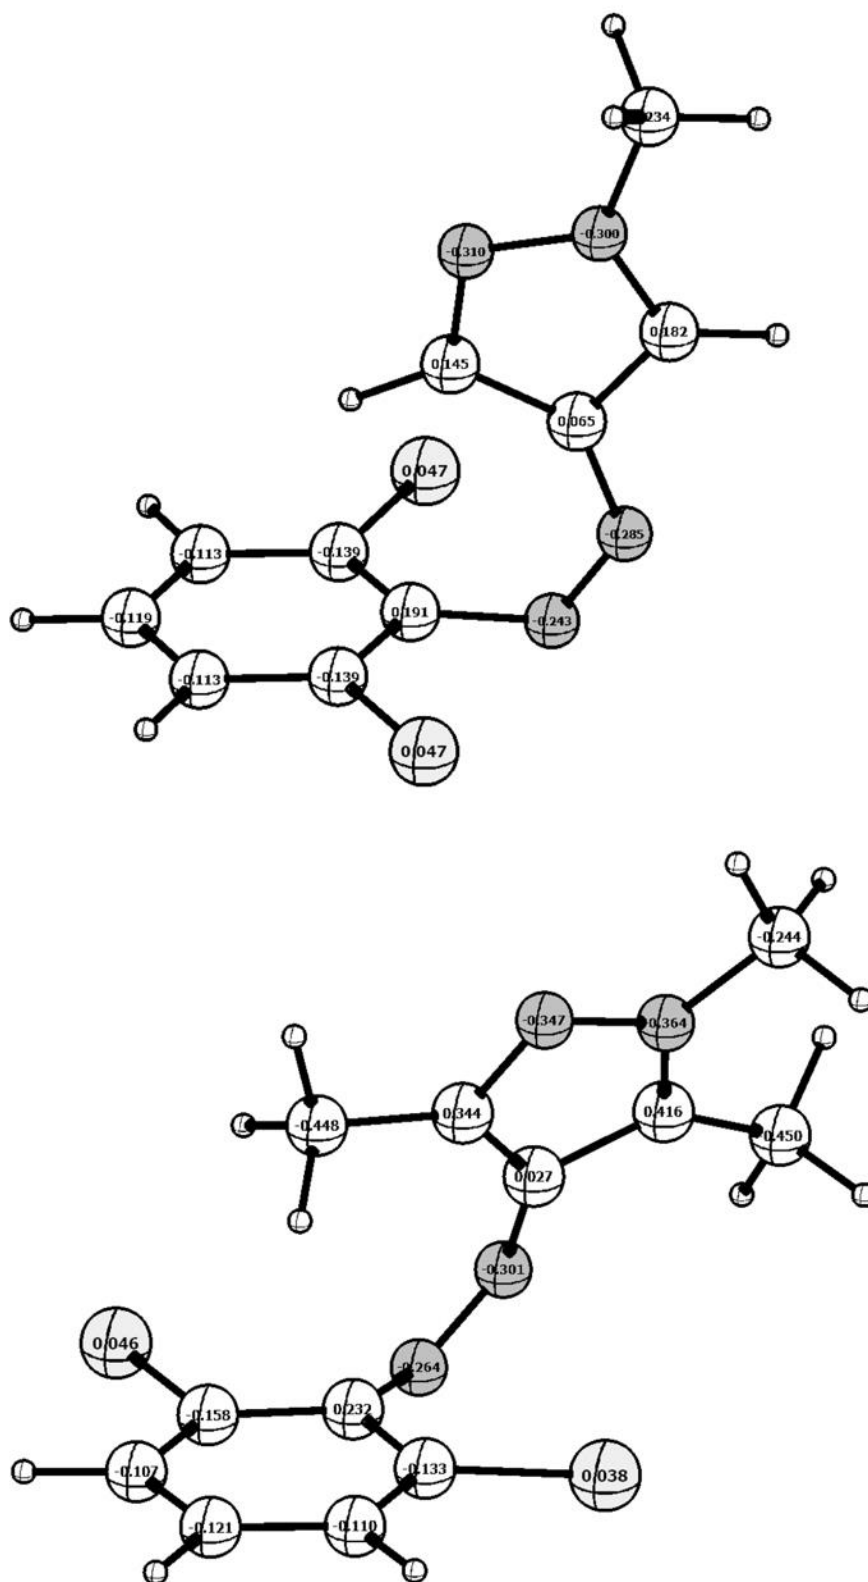

**Figure S8:** Atomic charges calculated for the Z-isomer minimum-energy geometry of 4pzH-CI2 (top) and 4pzMe-CI2 (bottom).



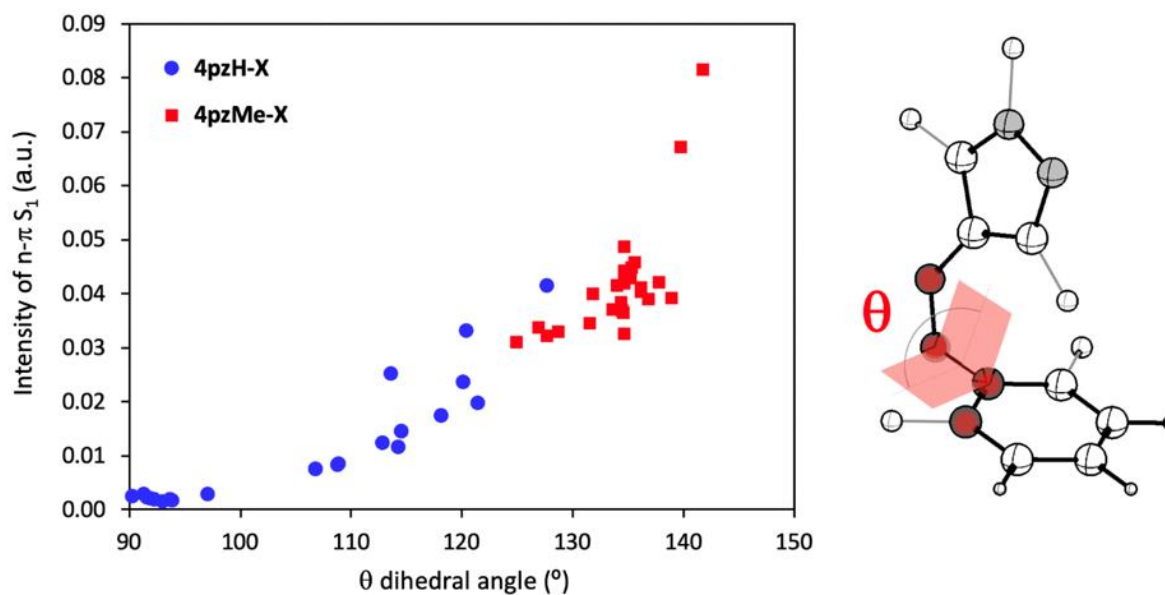

**Figure S9:** Intensity of the  $n-\pi^*$  electronic excitation as a function of the CCNN dihedral angle  $\theta$  between the aryl ring and the azo moiety.

Conformer labelling: “1” and “2” indicate the number of *ortho*-substitutions; “m” and “n” labels refer to the relative orientation of the heteroring with respect to the benzene moiety: N-methyl “m” or =N– atom “n” close to the benzene ring; and “X” and “Y” indicate the target *ortho* position in mono-substituted photoswitches (see Table 1).

**Table S1:** Excitation energies and oscillator strengths for the characteristic  $n-\pi^*$  and  $\pi-\pi^*$  transitions in Z-isomers.

|              | $n-\pi^*$ excitation |        |        | $\pi-\pi^*$ excitation <sup>a</sup> |        |      |
|--------------|----------------------|--------|--------|-------------------------------------|--------|------|
|              | E (eV)               | E (nm) | f      | E (eV)                              | E (nm) | f    |
| 4pzH-m       | 3.0264               | 410    | 0.0020 | 4.7832                              | 259    | 0.13 |
| 4pzH-n       | 3.0332               | 409    | 0.0019 | 4.8637                              | 255    | 0.12 |
| 4pzHCl1X-m   | 3.0311               | 409    | 0.0021 | 4.7692                              | 260    | 0.15 |
| 4pzHCl1X-n   | 3.0400               | 408    | 0.0027 | 4.9402                              | 251    | 0.25 |
| 4pzHCl1Y-m   | 3.0318               | 409    | 0.0021 | 4.7510                              | 261    | 0.15 |
| 4pzHCl1Y-n   | 3.0401               | 408    | 0.0027 | 4.9402                              | 251    | 0.25 |
| 4pzHCl2-m    | 3.0376               | 408    | 0.0018 | 4.7328                              | 262    | 0.23 |
| 4pzHCl2-n    | 3.0570               | 406    | 0.0017 | 4.8438                              | 256    | 0.27 |
| 4pzHF1X-m    | 2.9588               | 419    | 0.0084 | 4.9206                              | 252    | 0.20 |
| 4pzHF1X-n    | 2.9123               | 426    | 0.0174 | 4.8819                              | 254    | 0.30 |
| 4pzHF1Y-m    | 2.9595               | 419    | 0.0083 | 4.9206                              | 252    | 0.20 |
| 4pzHF1Y-n    | 2.9123               | 426    | 0.0174 | 4.8819                              | 254    | 0.30 |
| 4pzHF2-m     | 2.9441               | 421    | 0.0116 | 4.8062                              | 258    | 0.23 |
| 4pzHF2-n     | 2.9229               | 424    | 0.0197 | 4.8438                              | 256    | 0.28 |
| 4pzHOMe1X-m  | 2.9192               | 425    | 0.0075 | 4.8438                              | 256    | 0.15 |
| 4pzHOMe1X-n  | 2.8829               | 430    | 0.0144 | 4.8819                              | 254    | 0.30 |
| 4pzHOMe1Y-m  | 2.9194               | 425    | 0.0075 | 4.8438                              | 256    | 0.15 |
| 4pzHOMe1Y-n  | 2.8827               | 430    | 0.0144 | 4.8819                              | 254    | 0.30 |
| 4pzHOMe2-m   | 2.9413               | 422    | 0.0015 | 4.8249                              | 257    | 0.20 |
| 4pzHOMe2-n   | 2.8918               | 429    | 0.0122 | 4.8819                              | 254    | 0.25 |
| 4pzHPyr1X-m  | 2.6420               | 469    | 0.0252 | 4.5588                              | 272    | 0.10 |
| 4pzHPyr1X-n  | 2.6557               | 467    | 0.0331 | 4.6269                              | 268    | 0.13 |
| 4pzHPyr1Y-m  | 2.6267               | 472    | 0.0236 | 4.5091                              | 275    | 0.10 |
| 4pzHPyr1Y-n  | 2.6334               | 471    | 0.0415 | 4.4765                              | 277    | 0.12 |
| 4pzHPyr2-m   | 2.7493               | 451    | 0.0023 | 4.6269                              | 268    | 0.15 |
| 4pzHPyr2-n   | 2.6266               | 472    | 0.0052 | 4.7328                              | 262    | 0.15 |
| 4pzMe-m      | 2.6610               | 466    | 0.0389 | 4.1751                              | 297    | 0.10 |
| 4pzMe-n      | 2.6960               | 460    | 0.0419 | 4.3206                              | 287    | 0.18 |
| 4pzMeCl1X-m  | 2.7119               | 457    | 0.0401 | 4.2177                              | 294    | 0.10 |
| 4pzMeCl1X-n  | 2.7424               | 452    | 0.0418 | 4.3972                              | 282    | 0.20 |
| 4pzMeCl1Y-m  | 2.7696               | 448    | 0.0327 | 4.2321                              | 293    | 0.10 |
| 4pzMeCl1Y-n  | 2.8108               | 441    | 0.0336 | 4.4928                              | 276    | 0.18 |
| 4pzMeCl2-m   | 2.8094               | 441    | 0.0319 | 4.2177                              | 294    | 0.10 |
| 4pzMeCl2-n   | 2.8513               | 435    | 0.0309 | 4.5588                              | 272    | 0.24 |
| 4pzMeF1X-m   | 2.7523               | 450    | 0.0426 | 4.2321                              | 293    | 0.07 |
| 4pzMeF1X-n   | 2.7552               | 450    | 0.0455 | 4.3972                              | 282    | 0.19 |
| 4pzMeF1Y-m   | 2.7491               | 451    | 0.0388 | 4.1751                              | 297    | 0.10 |
| 4pzMeF1Y-n   | 2.7645               | 448    | 0.0409 | 4.3509                              | 285    | 0.20 |
| 4pzMeF2-m    | 2.8352               | 437    | 0.0414 | 4.2034                              | 295    | 0.10 |
| 4pzMeF2-n    | 2.8241               | 439    | 0.0438 | 4.3972                              | 282    | 0.18 |
| 4pzMeOMe1X-m | 2.7513               | 451    | 0.0441 | 4.3056                              | 288    | 0.14 |
| 4pzMeOMe1X-n | 2.7557               | 450    | 0.0485 | 4.4444                              | 279    | 0.18 |
| 4pzMeOMe1Y-m | 2.7333               | 454    | 0.0324 | 4.1892                              | 296    | 0.10 |
| 4pzMeOMe1Y-n | 2.7409               | 452    | 0.0366 | 4.3816                              | 283    | 0.19 |
| 4pzMeOMe2-m  | 2.8055               | 442    | 0.0344 | 4.3206                              | 287    | 0.15 |
| 4pzMeOMe2-n  | 2.7956               | 443    | 0.0397 | 4.4604                              | 278    | 0.23 |
| 4pzMePyr1X-m | 2.5757               | 481    | 0.0362 | 4.2177                              | 294    | 0.10 |
| 4pzMePyr1X-n | 2.6059               | 476    | 0.0383 | 4.3206                              | 287    | 0.14 |
| 4pzMePyr1Y-m | 2.5816               | 480    | 0.0670 | 4.2177                              | 294    | 0.12 |
| 4pzMePyr1Y-n | 2.5907               | 479    | 0.0814 | 4.3056                              | 288    | 0.18 |
| 4pzMePyr2-m  | 2.4752               | 501    | 0.0368 | 4.1892                              | 296    | 0.10 |
| 4pzMePyr2-n  | 2.5041               | 495    | 0.0446 | 4.3056                              | 288    | 0.15 |

<sup>a</sup> Excitation energies and intensities for the  $\pi-\pi^*$  transition in Z isomers were obtained from the simulated absorption spectra through Gaussian convolution of all the computed electronic excitations with a full-width-at-half-maximum of 0.2 eV.

**Table S2:** Excitation energies and oscillator strengths for the characteristic  $n-\pi^*$  and  $\pi-\pi^*$  transitions in *E*-isomers.

|               | $n-\pi^*$ excitation |        |        | $\pi-\pi^*$ excitation |        |        |
|---------------|----------------------|--------|--------|------------------------|--------|--------|
|               | E (eV)               | E (nm) | f      | E (eV)                 | E (nm) | f      |
| 4pzH-m        | 2.7745               | 447    | 0.0000 | 3.8991                 | 318    | 0.7770 |
| 4pzH-n        | 2.7727               | 447    | 0.0000 | 3.9699                 | 312    | 0.8187 |
| 4pzH-Cl1X-m   | 2.6898               | 461    | 0.0000 | 3.7638                 | 329    | 0.6834 |
| 4pzH-Cl1X-n   | 2.6846               | 462    | 0.0000 | 3.8218                 | 324    | 0.7107 |
| 4pzH-Cl1Y-m   | 2.7023               | 459    | 0.0158 | 3.9933                 | 310    | 0.5169 |
| 4pzH-Cl1Y-n   | 2.7101               | 458    | 0.0137 | 4.0524                 | 306    | 0.5281 |
| 4pzH-Cl2-m    | 2.7320               | 454    | 0.0155 | 4.0759                 | 304    | 0.5298 |
| 4pzH-Cl2-n    | 2.7443               | 452    | 0.0152 | 4.1463                 | 299    | 0.5341 |
| 4pzH-F1X-m    | 2.7497               | 451    | 0.0000 | 3.8238                 | 324    | 0.7652 |
| 4pzH-F1X-n    | 2.7455               | 452    | 0.0000 | 3.8881                 | 319    | 0.8034 |
| 4pzH-F1Y-m    | 2.6976               | 460    | 0.0000 | 3.9325                 | 315    | 0.7779 |
| 4pzH-F1Y-n    | 2.6987               | 459    | 0.0000 | 4.0052                 | 310    | 0.8136 |
| 4pzH-F2-m     | 2.6560               | 467    | 0.0000 | 3.8992                 | 318    | 0.8221 |
| 4pzH-F2-n     | 2.6529               | 467    | 0.0000 | 3.9732                 | 312    | 0.8805 |
| 4pzH-OMe1X-m  | 2.7015               | 459    | 0.0000 | 3.5866                 | 346    | 0.5749 |
| 4pzH-OMe1X-n  | 2.6997               | 459    | 0.0000 | 3.6305                 | 342    | 0.5899 |
| 4pzH-OMe1Y-m  | 2.6560               | 467    | 0.0000 | 3.7510                 | 331    | 0.5748 |
| 4pzH-OMe1Y-n  | 2.6613               | 466    | 0.0000 | 3.8121                 | 325    | 0.5693 |
| 4pzH-OMe2-m   | 2.6218               | 473    | 0.0201 | 3.8302                 | 324    | 0.6526 |
| 4pzH-OMe2-n   | 2.6415               | 469    | 0.0207 | 3.8951                 | 318    | 0.6432 |
| 4pzH-Pyr1X-m  | 2.8232               | 439    | 0.0603 | 3.2570                 | 381    | 0.2066 |
| 4pzH-Pyr1X-n  | 2.8281               | 438    | 0.0553 | 3.2930                 | 377    | 0.1951 |
| 4pzH-Pyr1Y-m  | 2.7637               | 449    | 0.0003 | 3.0612                 | 405    | 0.3504 |
| 4pzH-Pyr1Y-n  | 2.7711               | 447    | 0.0002 | 3.0817                 | 402    | 0.3677 |
| 4pzH-Pyr2-m   | 2.7419               | 452    | 0.0594 | 2.9836                 | 347    | 0.2708 |
| 4pzH-Pyr2-n   | 2.7484               | 451    | 0.0556 | 2.9991                 | 346    | 0.2704 |
| 4pzMe-m       | 2.7358               | 453    | 0.0000 | 3.7937                 | 327    | 0.7551 |
| 4pzMe-n       | 2.8094               | 441    | 0.0000 | 3.9022                 | 318    | 0.8044 |
| 4pzMe-Cl1X-m  | 2.7086               | 458    | 0.0000 | 3.7014                 | 335    | 0.6954 |
| 4pzMe-Cl1X-n  | 2.7225               | 455    | 0.0000 | 3.7739                 | 329    | 0.7471 |
| 4pzMe-Cl1Y-m  | 2.7260               | 455    | 0.0193 | 3.9606                 | 313    | 0.5769 |
| 4pzMe-Cl1Y-n  | 2.7599               | 449    | 0.0148 | 4.0252                 | 308    | 0.6282 |
| 4pzMe-Cl2-m   | 2.8101               | 441    | 0.0140 | 4.0196                 | 308    | 0.5588 |
| 4pzMe-Cl2-n   | 2.7868               | 445    | 0.0153 | 4.0778                 | 304    | 0.6042 |
| 4pzMe-F1X-m   | 2.7062               | 458    | 0.0000 | 3.7168                 | 334    | 0.7488 |
| 4pzMe-F1X-n   | 2.7794               | 446    | 0.0000 | 3.8205                 | 325    | 0.7991 |
| 4pzMe-F1Y-m   | 2.7136               | 457    | 0.0031 | 3.8639                 | 321    | 0.7665 |
| 4pzMe-F1Y-n   | 2.7365               | 453    | 0.0000 | 3.9432                 | 314    | 0.8306 |
| 4pzMe-F2-m    | 2.6379               | 470    | 0.0017 | 3.7961                 | 327    | 0.7816 |
| 4pzMe-F2-n    | 2.7073               | 458    | 0.0032 | 3.9164                 | 317    | 0.8388 |
| 4pzMe-OMe1X-m | 2.6593               | 466    | 0.0000 | 3.5322                 | 351    | 0.6283 |
| 4pzMe-OMe1X-n | 2.7323               | 454    | 0.0000 | 3.6168                 | 343    | 0.6602 |
| 4pzMe-OMe1Y-m | 2.6140               | 474    | 0.0000 | 3.6933                 | 336    | 0.6396 |
| 4pzMe-OMe1Y-n | 2.6890               | 461    | 0.0000 | 3.7930                 | 327    | 0.6481 |
| 4pzMe-OMe2-m  | 2.5953               | 478    | 0.0095 | 3.7048                 | 335    | 0.6652 |
| 4pzMe-OMe2-n  | 2.6616               | 466    | 0.0152 | 3.8167                 | 325    | 0.7077 |
| 4pzMe-Pyr1X-m | 2.7918               | 444    | 0.0547 | 3.2550                 | 381    | 0.2322 |
| 4pzMe-Pyr1X-n | 2.8417               | 436    | 0.0591 | 3.3370                 | 372    | 0.2002 |
| 4pzMe-Pyr1Y-m | 2.7371               | 453    | 0.0885 | 3.1391                 | 395    | 0.2328 |
| 4pzMe-Pyr1Y-n | 2.7794               | 446    | 0.0888 | 3.1711                 | 391    | 0.2540 |
| 4pzMe-Pyr2-m  | 2.6756               | 463    | 0.0884 | 2.9741                 | 352    | 0.3585 |
| 4pzMe-Pyr2-n  | 2.6898               | 461    | 0.0845 | 2.9983                 | 349    | 0.3668 |

**Table S3:** Solvent effect on the theoretical half-life time (in days) calculated at the PBE0-D3/6-31G\*\* level in a single-point calculation or including geometry reoptimization, under the PCM model (acetonitrile).<sup>a</sup>

|                 | Gas phase | Single-point PCM | Optimized PCM |
|-----------------|-----------|------------------|---------------|
| <b>4pzH</b>     | 1300      | 3200             | 4000          |
| <b>4pzHF2</b>   | 4100      | 40000            | 46000         |
| <b>4pzHCl2</b>  | 5.1       | 810              | 62            |
| <b>4pzMe</b>    | 0.38      | 4.2              | 4.1           |
| <b>4pzMeF2</b>  | 26        | 490              | 110           |
| <b>4pzMeCl2</b> | 0.001     | 0.10             | 0.01          |

<sup>a</sup> In all cases, the most stable transition state conformer is the one in which the azo N atom adjacent to the benzene moiety is inverted (B-type).

**Table S4:** Solvent effect (PCM, acetonitrile) on the theoretical energy separation (in nm) of the characteristic electronic excitations calculated at the PBE0-D3/6-31G\*\* level.

|                 | Gas phase      | Single-point PCM | Gas phase        | Single-point PCM |
|-----------------|----------------|------------------|------------------|------------------|
|                 | $n-\pi^*(E-Z)$ | $n-\pi^*(E-Z)$   | $\pi-\pi^*(E-Z)$ | $\pi-\pi^*(E-Z)$ |
| <b>4pzH</b>     | 38             | 41               | 58               | 80               |
| <b>4pzHF2</b>   | 44             | 46               | 58               | 67               |
| <b>4pzHCl2</b>  | 46             | 41               | 43               | 50               |
| <b>4pzMe</b>    | -15            | -10              | 30               | 48               |
| <b>4pzMeF2</b>  | 26             | 23               | 33               | 41               |
| <b>4pzMeCl2</b> | 5              | 7                | 23               | 21               |

## General synthetic methods

All reagents and solvents were purchased from commercial sources and used as supplied unless otherwise indicated. All reactions were monitored by thin-layer chromatography (TLC) using Merck silica gel 60 F254 plates (0.25 mm). TLC plates were visualised using UV light (254 nm) and/or by using the appropriate TLC stain. Silica column chromatography was performed using Merck Silica Gel 60 (230–400 mesh) treated with a solvent system specified in the individual procedures. Solvents were removed by rotary evaporator at 40 °C or below, in the dark, and the compounds further dried using high vacuum pumps. Infrared spectra were recorded neat on an Agilent Cary 630 FTIR. Reported absorptions are in wavenumbers ( $\text{cm}^{-1}$ ).  $^1\text{H}$  and  $^{13}\text{C}$  NMR were recorded on a Bruker Avance 400 spectrometer at 400 MHz and 100 MHz, respectively. Chemical shifts ( $\delta$ ) are quoted in ppm (parts per million) downfield from tetramethylsilane, referenced to residual solvent signals:  $^1\text{H}$   $\delta$  = 7.26 ( $\text{CHCl}_3$ ), 1.94 ( $\text{MeCN-}d_3$ ),  $^{13}\text{C}$   $\delta$  = 77.16 ( $\text{CDCl}_3$ ). The following abbreviations are used to designate multiplicity within  $^1\text{H}$  NMR analysis; s = singlet, d = doublet, t = triplet, q = quartet, m = multiplet, br. = broad signal. High-resolution mass spectra (ESI, APCI) were recorded by the Imperial College London Department of Chemistry Mass Spectroscopy Service using a Micromass Autospec Premier and Micromass LCT Premier spectrometer. LCMS analysis of compounds were conducted using a reverse phase LCMS Waters 2767 system equipped with a photodiode array and an ESI mass spectrometer using an XBridge C18 (5  $\mu\text{m}$ , 100 mm  $\times$  4.6 mm) column, equipped with an XBridge C18 guard column (5  $\mu\text{m}$ , 4.6 mm  $\times$  20 mm). An eluent of MeCN and  $\text{H}_2\text{O}$  was used: 0–10 min 50–98% MeCN, 10–12 min 98% MeCN, 12–13 min 98 to 50% MeCN, 13–17 min 50% MeCN.

## Synthetic route

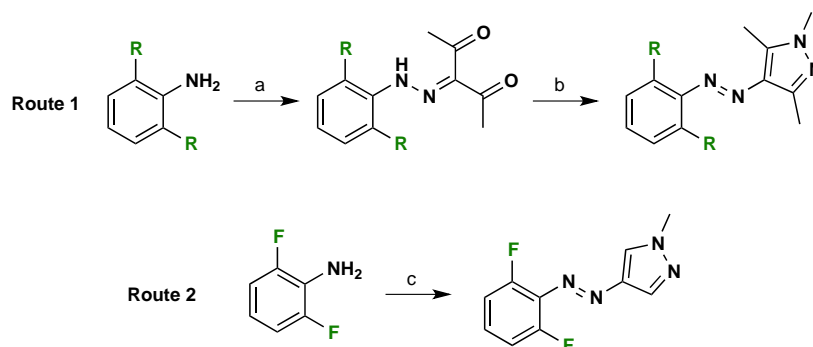

**Scheme S1:** (a) (i)  $\text{NaNO}_2$ , HCl or AcOH, 0°C (ii) Acetylacetone, NaOAc,  $\text{H}_2\text{O}$ . (b) (i)  $\text{MeNHNH}_2$ , EtOH or MeOH/ $\text{CH}_2\text{Cl}_2$ , reflux. (c) (i) oxone,  $\text{CH}_2\text{Cl}_2/\text{H}_2\text{O}$  (ii) 1-methyl-1H-pyrazol-4-amine, AcOH,  $\text{CHCl}_3$ .

### 3-(2-(2,6-Dimethoxyphenyl)hydrazono)pentane-2,4-dione

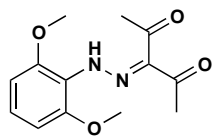

A solution of NaNO<sub>2</sub> (169 mg, 2.45 mmol) in water (0.2 mL) was added dropwise to 2,6-dimethoxyaniline (250 mg, 1.63 mmol) in 1 M HCl (5 mL) at 0 °C. The resulting solution was stirred for 0.5 h before being added dropwise to a solution of acetylacetone (0.2 mL, 2.0 mmol) and NaOAc (201 mg, 2.45 mmol) in water (2 mL) at 0 °C. Further NaOAc was added to adjust the pH to 7 resulting in a yellow-green precipitate. After 1 h, the precipitate was filtered, washed with water and dried to yield the desired product as yellow-green solid (375 mg, 1.42 mmol, 87% yield). <sup>1</sup>H NMR (400 MHz, CDCl<sub>3</sub>) δ 14.67 (s, 1H), 7.11 (t, *J* = 8.4 Hz, 1H), 6.62 (d, *J* = 8.5 Hz, 2H), 3.88 (s, 6H), 2.56 (s, 3H), 2.39 (s, 3H); <sup>13</sup>C NMR (101 MHz, CDCl<sub>3</sub>) δ 197.8, 196.8, 152.2, 133.6, 126.7, 119.5, 104.9, 56.4, 31.6, 26.5; HRMS (ES) *m/z* calc. for C<sub>13</sub>H<sub>17</sub>N<sub>2</sub>O<sub>4</sub> [M+H]<sup>+</sup> 265.1188; found 265.1184; IR: 2964, 2832, 1653, 1517, 1354, 1326, 1255, 1180, 1105, 1095, 1025, 847.

### (*E*)-4-((2,6-Dimethoxyphenyl)diazenyl)-1,3,5-trimethyl-1*H*-pyrazole

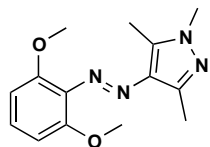

Methylhydrazine (0.10 mL, 2.0 mmol) was added to a solution of 3-(2-(2,6-dimethoxyphenyl)hydrazono)pentane-2,4-dione (350 mg, 1.32 mmol) in CH<sub>2</sub>Cl<sub>2</sub> (3 mL) and MeOH (6 mL). The reaction mixture was heated at 50 °C for 1 h. Further methylhydrazine (0.10 mL, 2.0 mmol) was added and heating continued for another 0.75 h. The reaction mixture was allowed to cool to room temperature, diluted with CH<sub>2</sub>Cl<sub>2</sub> (30 mL) and washed with 1 M HCl (50 mL). The organic layer was separated and the aqueous layer was extracted with CH<sub>2</sub>Cl<sub>2</sub> (2 × 30 mL). The combined organic phases were washed with brine, dried over anhydrous Mg<sub>2</sub>SO<sub>4</sub>, concentrated in vacuo and subjected to purification by silica gel column chromatography (100% EtOAc). Recrystallization from diethyl ether produced pale orange crystals (329 mg, 1.20 mmol, 91% yield). LCMS (2.76 min); <sup>1</sup>H NMR (400 MHz, CDCl<sub>3</sub>) δ 7.16 (t, *J* = 8.3 Hz, 1H), 6.66 (d, *J* = 8.4 Hz, 2H), 3.80 (s, 6H), 3.76 (s, 3H), 2.53 (s, 3H), 2.47 (s, 3H); <sup>13</sup>C NMR (101 MHz, CDCl<sub>3</sub>) δ 152.3, 142.5, 137.9, 136.5, 134.8, 127.9, 105.8, 56.7, 36.0, 13.7, 10.2; HRMS (ES) *m/z* calc. for C<sub>14</sub>H<sub>19</sub>N<sub>4</sub>O<sub>2</sub> [M+H]<sup>+</sup> 275.1508; found 275.1508; IR: 2990, 2935, 2836, 1587, 1476, 1433, 1409, 1366, 1251, 1108, 1031, 984, 892.

### 3-(2-(2,6-Difluorophenyl)hydrazono)pentane-2,4-dione

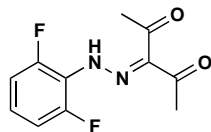

This compound was synthesized according to literature precedent [2].  $^1\text{H}$  NMR (400 MHz,  $\text{CDCl}_3$ )  $\delta$  14.44 (s, 1H), 7.17 – 7.04 (m, 1H), 7.03 – 6.93 (m, 2H), 2.59 (s, 3H), 2.40 (s, 3H);  $^{13}\text{C}$  NMR (101 MHz,  $\text{CDCl}_3$ )  $\delta$  198.2, 197.5, 155.5, 155.4, 153.0, 152.9, 135.1, 125.5, 125.5, 125.5, 125.4, 119.8, 112.7, 112.7, 112.6, 112.5, 31.8, 26.6;  $^{19}\text{F}$  NMR (377 MHz,  $\text{CDCl}_3$ )  $\delta$  -124.4; HRMS (ES)  $m/z$  calc. for  $\text{C}_{11}\text{H}_{11}\text{N}_2\text{O}_2\text{F}_2$   $[\text{M}+\text{H}]^+$  241.0789; found 241.0796; IR: 3060, 3003, 1677, 1633, 1520.

### (E)-4-((2,6-Difluorophenyl)diazenyl)-1,3,5-trimethyl-1H-pyrazole

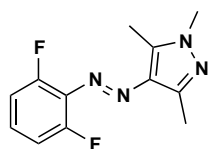

Methylhydrazine (70  $\mu\text{L}$ , 1.2 mmol) was added to a solution of 3-(2-(2,6-difluorophenyl)hydrazono)pentane-2,4-dione (250 mg, 1.04 mmol) in EtOH (10 mL). The reaction mixture was refluxed for 1 h, cooled to room temperature and concentrated in vacuo. EtOAc (50 mL) and  $\text{H}_2\text{O}$  (25 mL) were added and the aqueous layer separated. The aqueous layer was extracted with EtOAc (2  $\times$  10 mL). The combined organic phases were washed with 1 M HCl, saturated  $\text{NaHCO}_3$ , brine, dried over anhydrous  $\text{Mg}_2\text{SO}_4$ , concentrated in vacuo and subjected to purification by silica gel column chromatography (0–10% EtOAc/ $\text{CH}_2\text{Cl}_2$ ). The title compound was obtained as orange solid (182 mg, 0.73 mmol, 70% yield). LCMS (5.83 min);  $^1\text{H}$  NMR (400 MHz,  $\text{CDCl}_3$ )  $\delta$  7.23 – 7.15 (m, 1H), 7.01 – 6.93 (m, 2H), 3.78 (s, 3H), 2.55 (s, 3H), 2.46 (s, 3H);  $^{13}\text{C}$  NMR (101 MHz,  $\text{CDCl}_3$ )  $\delta$  157.2, 157.1, 154.6, 154.6, 142.6, 140.0, 136.8, 132.3, 128.4, 128.3, 128.2, 112.5, 112.4, 112.3, 112.3, 36.2, 13.9, 10.0; HRMS (ES)  $m/z$  calc. for  $\text{C}_{12}\text{H}_{13}\text{N}_4\text{F}_2$   $[\text{M}+\text{H}]^+$  251.1108; found 251.1108; IR: 2985, 2920, 1610, 1506, 1422.

### 3-(2-(2,6-Dichlorophenyl)hydrazono)pentane-2,4-dione

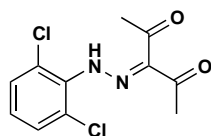

This compound was synthesized according to literature precedent [3].  $^1\text{H}$  NMR (400 MHz,  $\text{CDCl}_3$ )  $\delta$  14.54 (s, 1H), 7.38 (d,  $J$  = 8.1 Hz, 2H), 7.10 (dd,  $J$  = 8.4, 7.8 Hz, 1H), 2.62 (s, 3H), 2.44 (s, 3H);  $^{13}\text{C}$  NMR (101 MHz,  $\text{CDCl}_3$ )  $\delta$  198.3, 197.6, 135.5, 134.6, 129.8, 129.2, 129.0, 127.6, 126.9, 31.8, 26.9; HRMS (ES)  $m/z$  calc. for  $\text{C}_{11}\text{H}_{11}\text{N}_2\text{O}_2\text{Cl}_2$   $[\text{M}+\text{H}]^+$  273.0198; found 273.0193; IR: 3076, 2999, 2919, 1668, 1631, 1506.

### (E)-4-((2,6-Dichlorophenyl)diazenyl)-1,3,5-trimethyl-1H-pyrazole

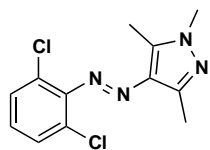

Methylhydrazine (93  $\mu$ L, 1.8 mmol) was added to a solution of 3-(2-(2,6-dichlorophenyl)hydrazono)pentane-2,4-dione (400 mg, 1.47 mmol) in EtOH (10 mL). The reaction mixture was refluxed for 1 h, cooled to room temperature and concentrated in vacuo. EtOAc (50 mL) and H<sub>2</sub>O (25 mL) were added and the aqueous layer separated. The aqueous layer was extracted with EtOAc (2  $\times$  10 mL). The combined organic phases were washed with 1 M HCl, saturated NaHCO<sub>3</sub>, brine, dried over anhydrous Mg<sub>2</sub>SO<sub>4</sub>, concentrated in vacuo and subjected to purification by silica gel column chromatography (0–10% EtOAc/CH<sub>2</sub>Cl<sub>2</sub>). The title compound was obtained as orange solid (261 mg, 0.93 mmol, 63% yield). LCMS (7.64 min); <sup>1</sup>H NMR (400 MHz, CDCl<sub>3</sub>)  $\delta$  7.37 (d, *J* = 8.1 Hz, 2H), 7.11 (dd, *J* = 8.4, 7.8 Hz, 1H), 3.79 (s, 3H), 2.57 (s, 3H), 2.49 (s, 3H); <sup>13</sup>C NMR (101 MHz, CDCl<sub>3</sub>)  $\delta$  148.9, 142.9, 140.3, 135.9, 129.2, 127.6, 127.4, 36.2, 13.9, 10.1; HRMS (ES) *m/z* calc. for C<sub>12</sub>H<sub>13</sub>N<sub>4</sub>Cl<sub>2</sub> [M+H]<sup>+</sup> 283.0517; found 283.0518; IR: 2976, 2919, 1554, 1427, 1392, 1366.

### (E)-4-((2,6-Difluorophenyl)diazenyl)-1-methyl-1H-pyrazole

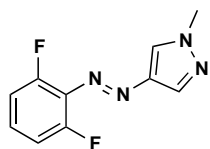

To a stirred biphasic mixture of 2,6-difluoroaniline (100 mg, 0.78 mmol) in CH<sub>2</sub>Cl<sub>2</sub> (10 mL) and H<sub>2</sub>O (10 mL) was added a solution of oxone (288 mg, 0.94 mmol) in H<sub>2</sub>O (3 mL). The reaction mixture was stirred in the dark at room temperature for 18 h. CH<sub>2</sub>Cl<sub>2</sub> (20 mL) and H<sub>2</sub>O (5 mL) were added and the aqueous layer separated. The aqueous layer was extracted with CH<sub>2</sub>Cl<sub>2</sub> (2  $\times$  15 mL). The combined organic phases were washed with brine, dried over anhydrous Mg<sub>2</sub>SO<sub>4</sub> and concentrated in vacuo to yield crude 1,3-difluoro-2-nitrosobenzene as tan solid. This was dissolved in AcOH acid/CHCl<sub>3</sub> 4:1 and added to a solution of 1-methyl-1H-pyrazol-4-amine (76 mg, 0.78 mmol) in AcOH (1 mL). The reaction mixture was stirred at room temperature for 18 h. Subsequently, the mixture was concentrated in vacuo, using PhMe to azeotrope off any AcOH, and subjected to purification by silica gel column chromatography (0–20% Et<sub>2</sub>O/pentane). The title compound was obtained as orange solid (100 mg, 0.45 mmol, 58% yield). <sup>1</sup>H NMR (400 MHz, CDCl<sub>3</sub>)  $\delta$  8.05 – 8.01 (m, 2H), 7.29 – 7.22 (m, 1H), 7.05 – 6.96 (m, 2H), 3.98 (s, 3H); <sup>13</sup>C NMR (101 MHz, CDCl<sub>3</sub>)  $\delta$  157.1, 157.1, 154.6, 154.5, 142.8, 133.6, 129.6, 129.5, 129.4, 127.5, 112.7, 112.6, 112.5, 112.4, 39.8; HRMS (ES) *m/z* calc. for C<sub>10</sub>H<sub>9</sub>N<sub>4</sub>F<sub>2</sub> [M+H]<sup>+</sup> 223.0795; found 223.0794; IR: 3111, 1534, 1472, 1450, 1386.



## UV–vis, photostationary state (PSS) and thermal isomerization kinetics

All samples were irradiated using a Luzchem LZC-4V photoreactor fitted with 12 × 8W LZC-UV A (**E**→**Z**) or LZC-420 nm (**Z**→**E**) lamps. To measure UV–vis spectra, 25 μM solutions of each compound in MeCN were prepared. To determine the PSS, an ≈ 20 mM solution of the relevant compound in MeCN-*d*<sub>3</sub> was irradiated until no further change was observable by <sup>1</sup>H NMR. In order to determine the **Z**→**E** thermal isomerization kinetics an ≈ 20 mM solution of the relevant compound in MeCN-*d*<sub>3</sub> or DMSO-*d*<sub>6</sub> was irradiated using 12 × 8W LZC-UV A lamps until no further change was observable by <sup>1</sup>H NMR. The change in **Z** isomer percentage was then followed as a function of time by <sup>1</sup>H NMR, through integration of the relevant peaks. In between measurements, NMR samples were kept in the dark and immersed in an oil bath which was held at 25 °C. The natural log of the **Z** isomer concentration was plotted against time to yield a straight line, as would be expected from first order kinetics. The gradient of this line was used to calculate the rate constant for **Z**→**E** conversion from which the thermal half-life could be calculated:

$$t_{1/2} = \frac{\ln(2)}{k}$$

For the case of **4pzH-F2**, kinetic studies were instead performed at elevated temperatures (vide infra) so as to generate an Eyring plot which in turn allowed determination of the thermal half-life at 25 °C via extrapolation.

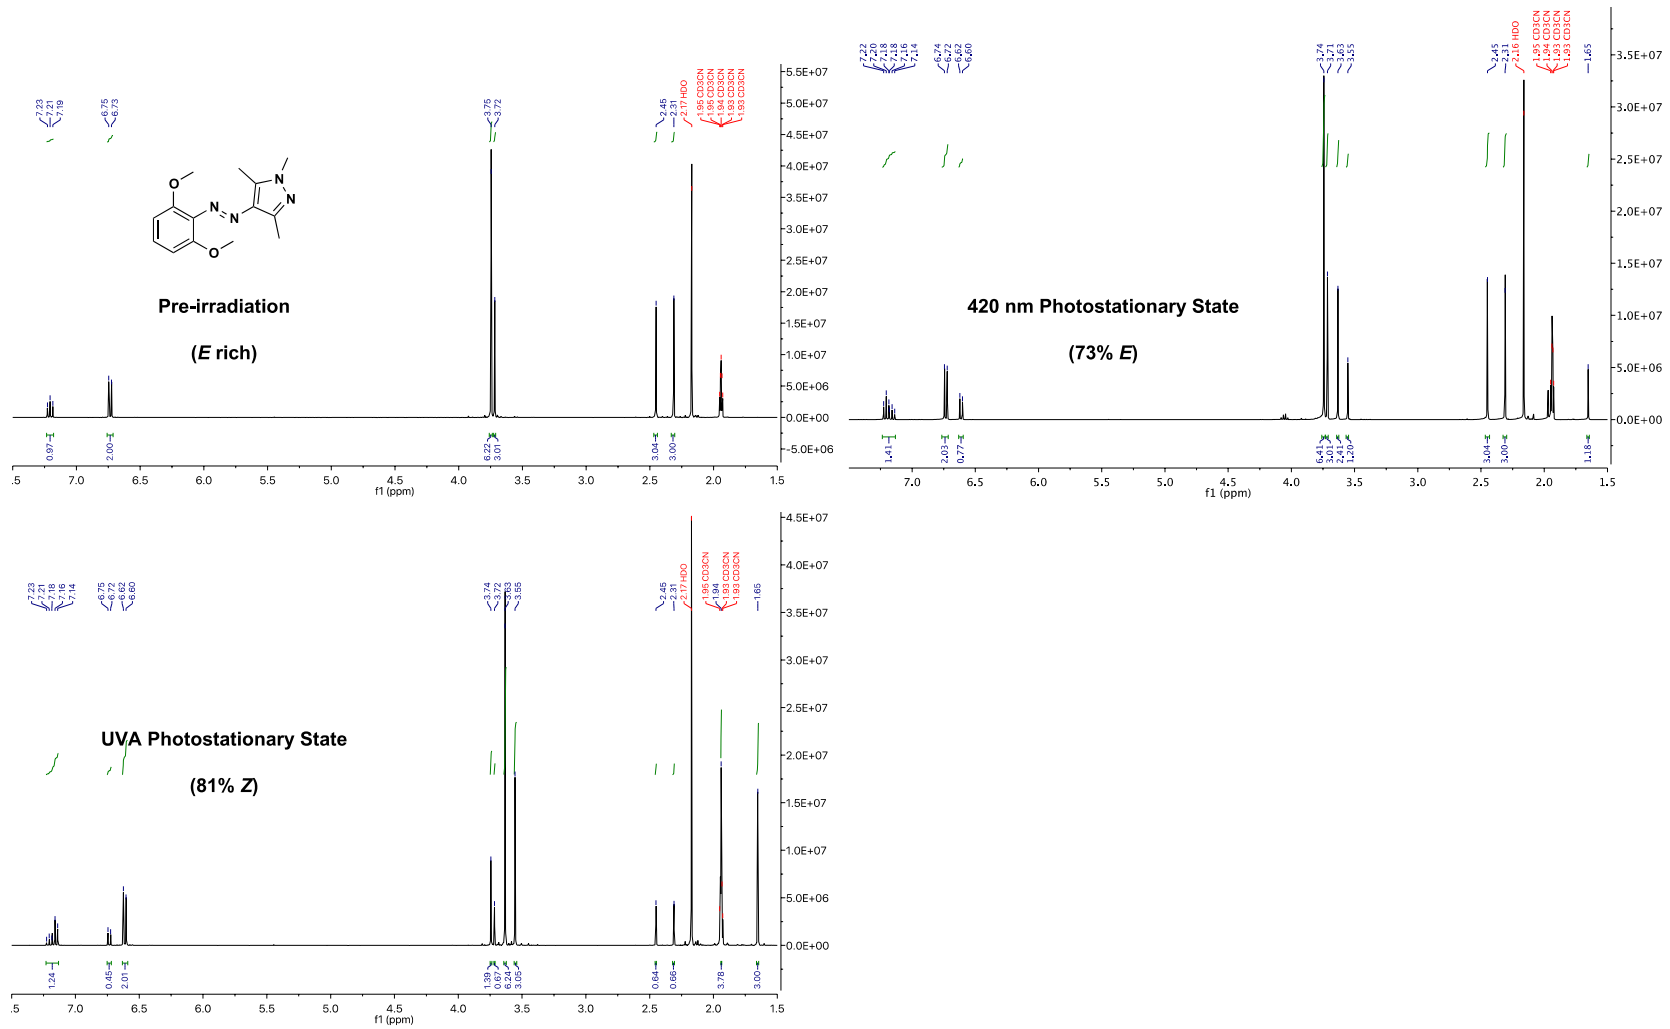

Figure S10. 4pzMe-OMe2 <sup>1</sup>H NMR spectra of the *E*-rich state, UVA PSS and 420 nm PSS in MeCN-d<sub>3</sub> at ≈ 20 mM.

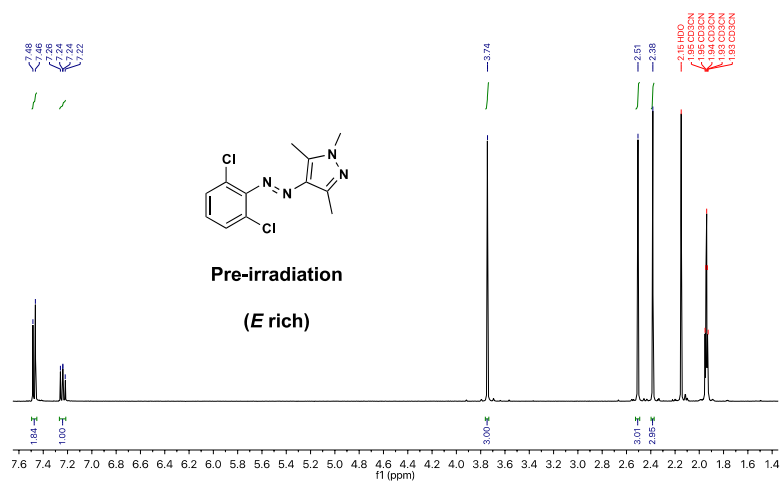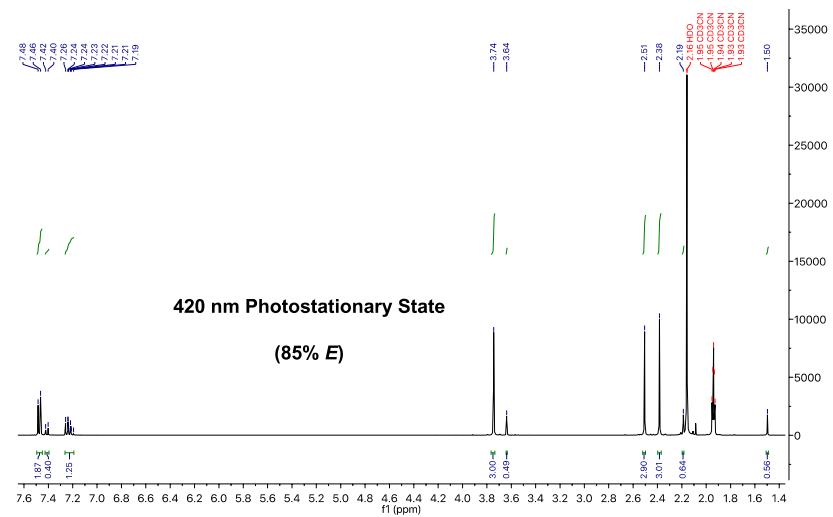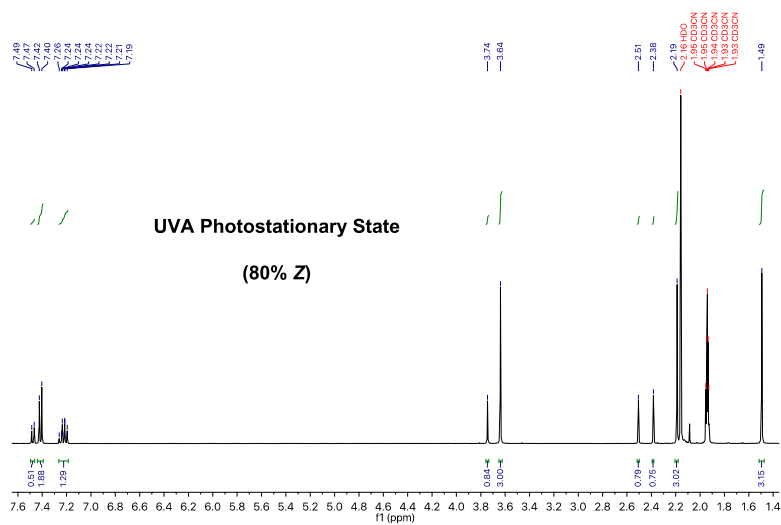

Figure S11. 4pzMe-CI2 <sup>1</sup>H NMR spectra of the *E*-rich state, UVA PSS and 420 nm PSS in MeCN-d<sub>3</sub> at ≈ 20 mM.

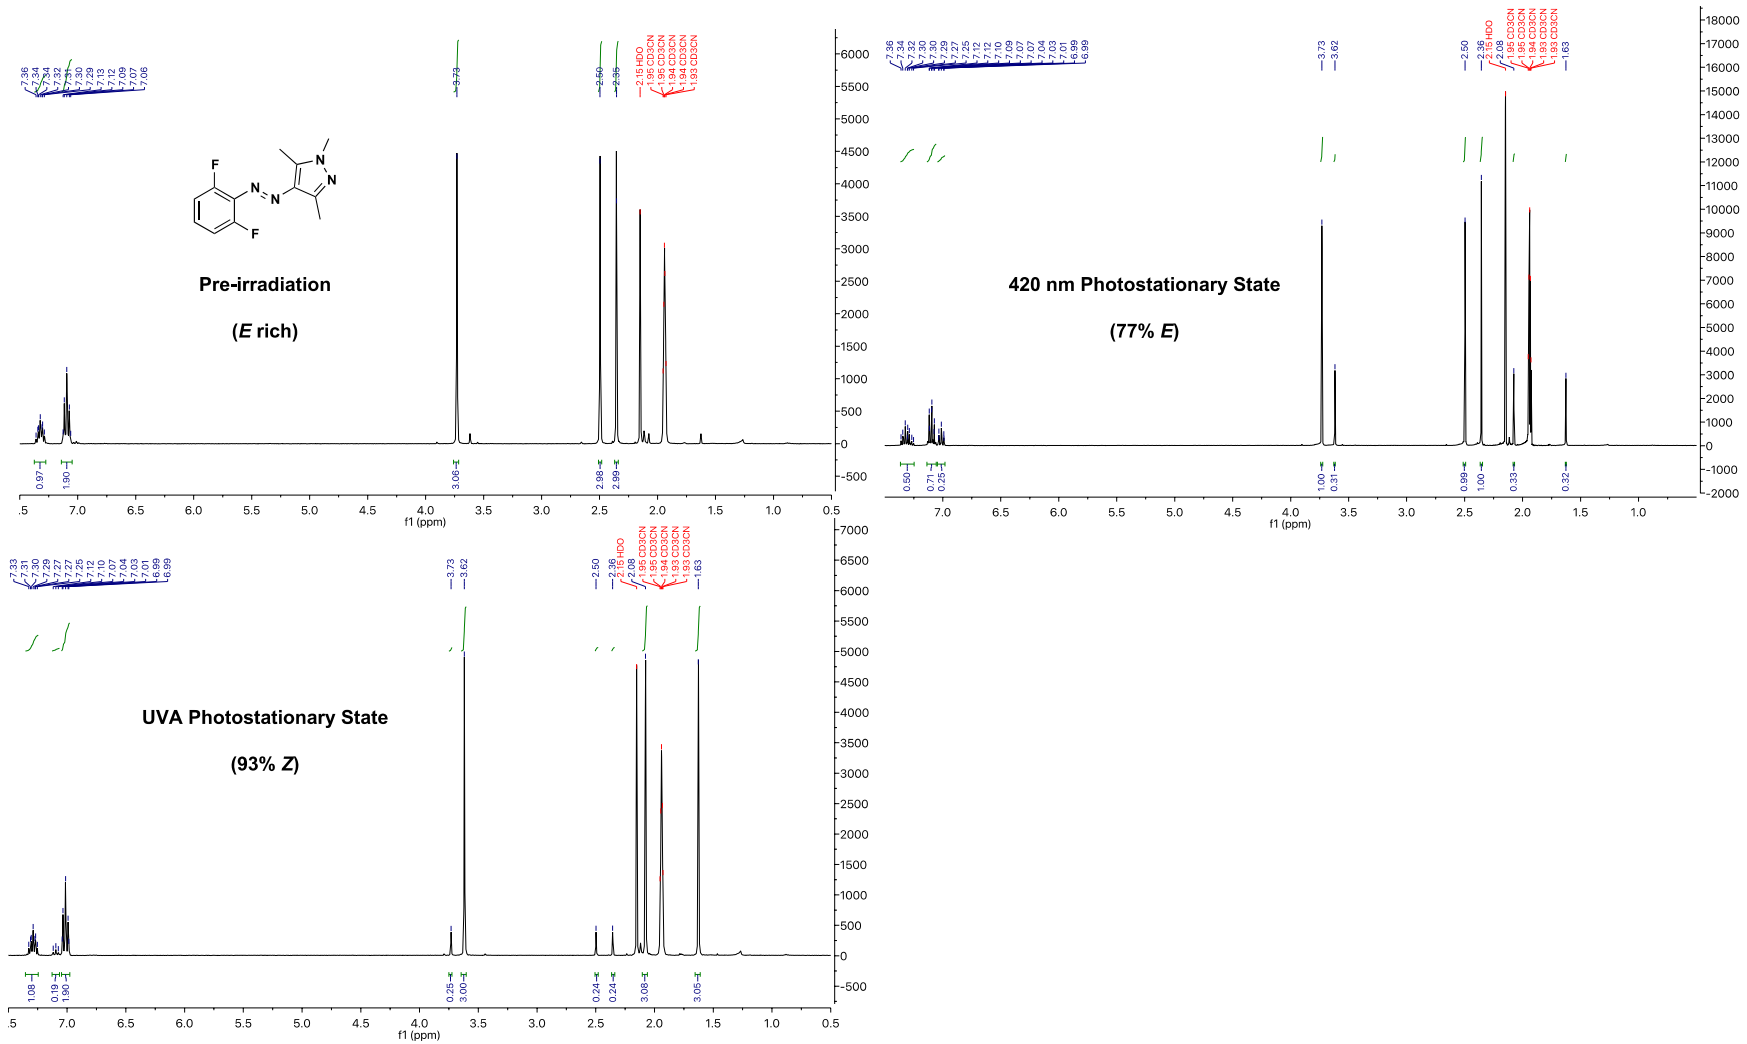

Figure S12. 4pzMe-F2 <sup>1</sup>H NMR spectra of the *E*-rich state, UVA PSS and 420 nm PSS in MeCN-*d*<sub>3</sub> at ≈ 20 mM.

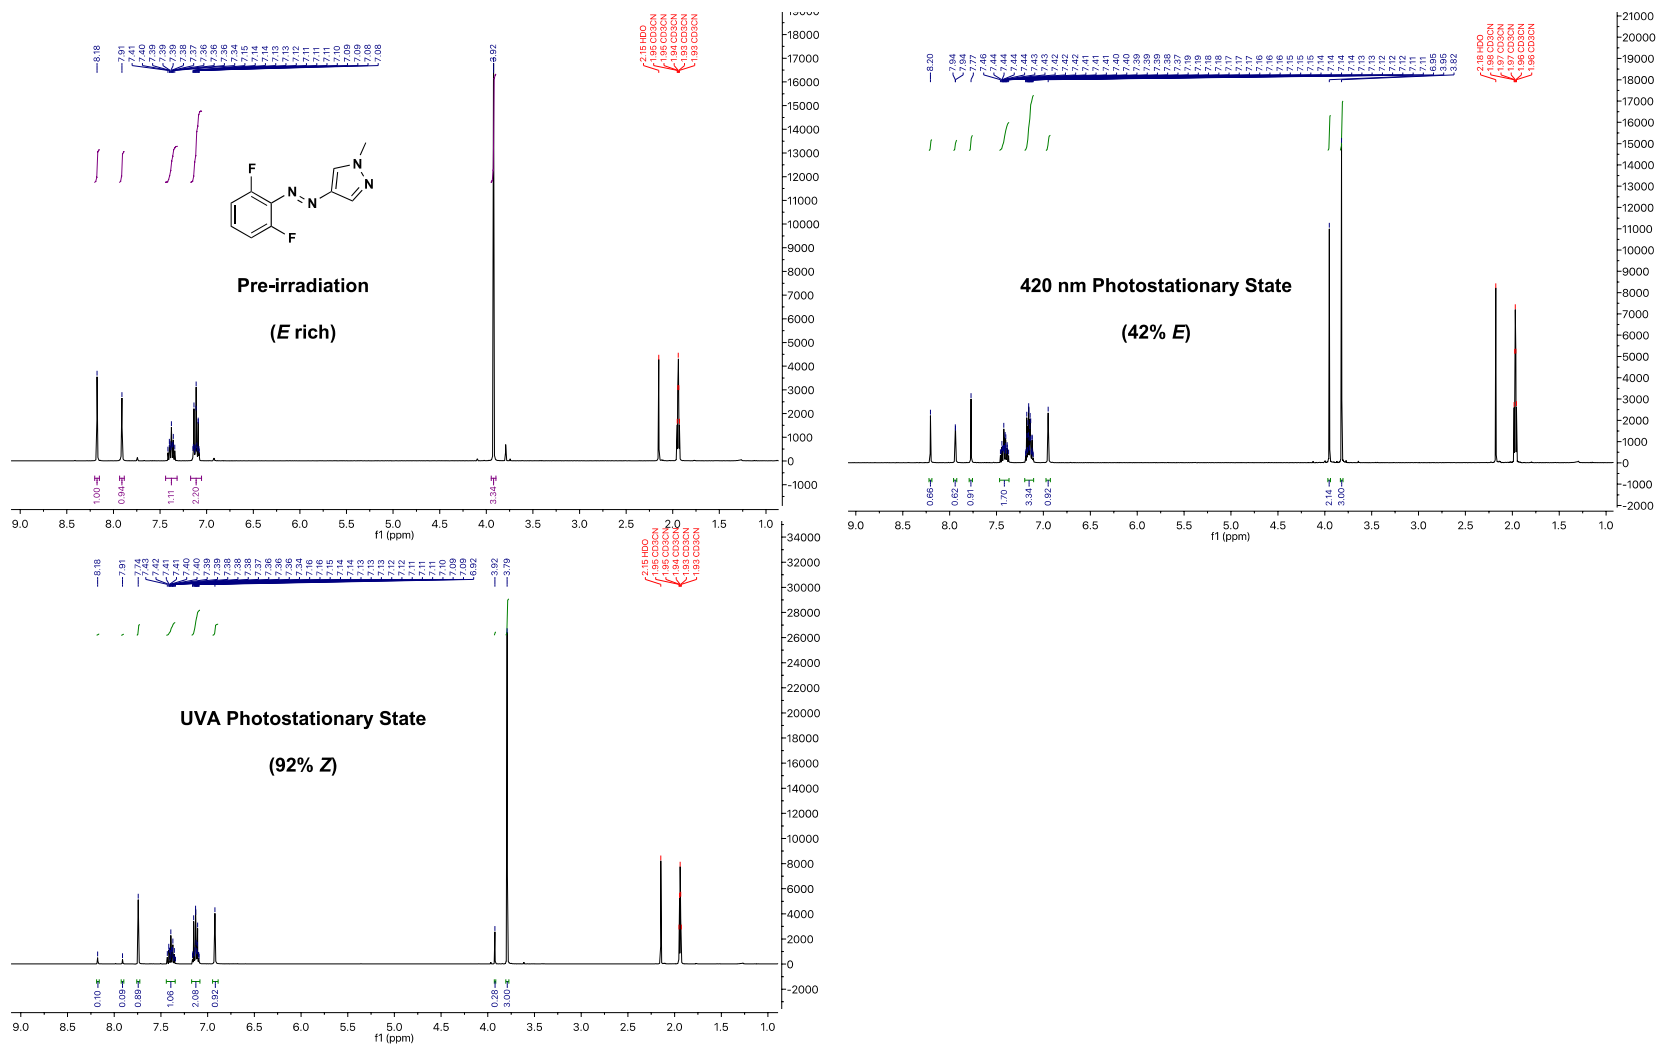

Figure S13. 4pzH-F2 <sup>1</sup>H NMR spectra of the *E*-rich state, UVA PSS and 420 nm PSS in MeCN-*d*<sub>3</sub> at ≈ 20 mM.

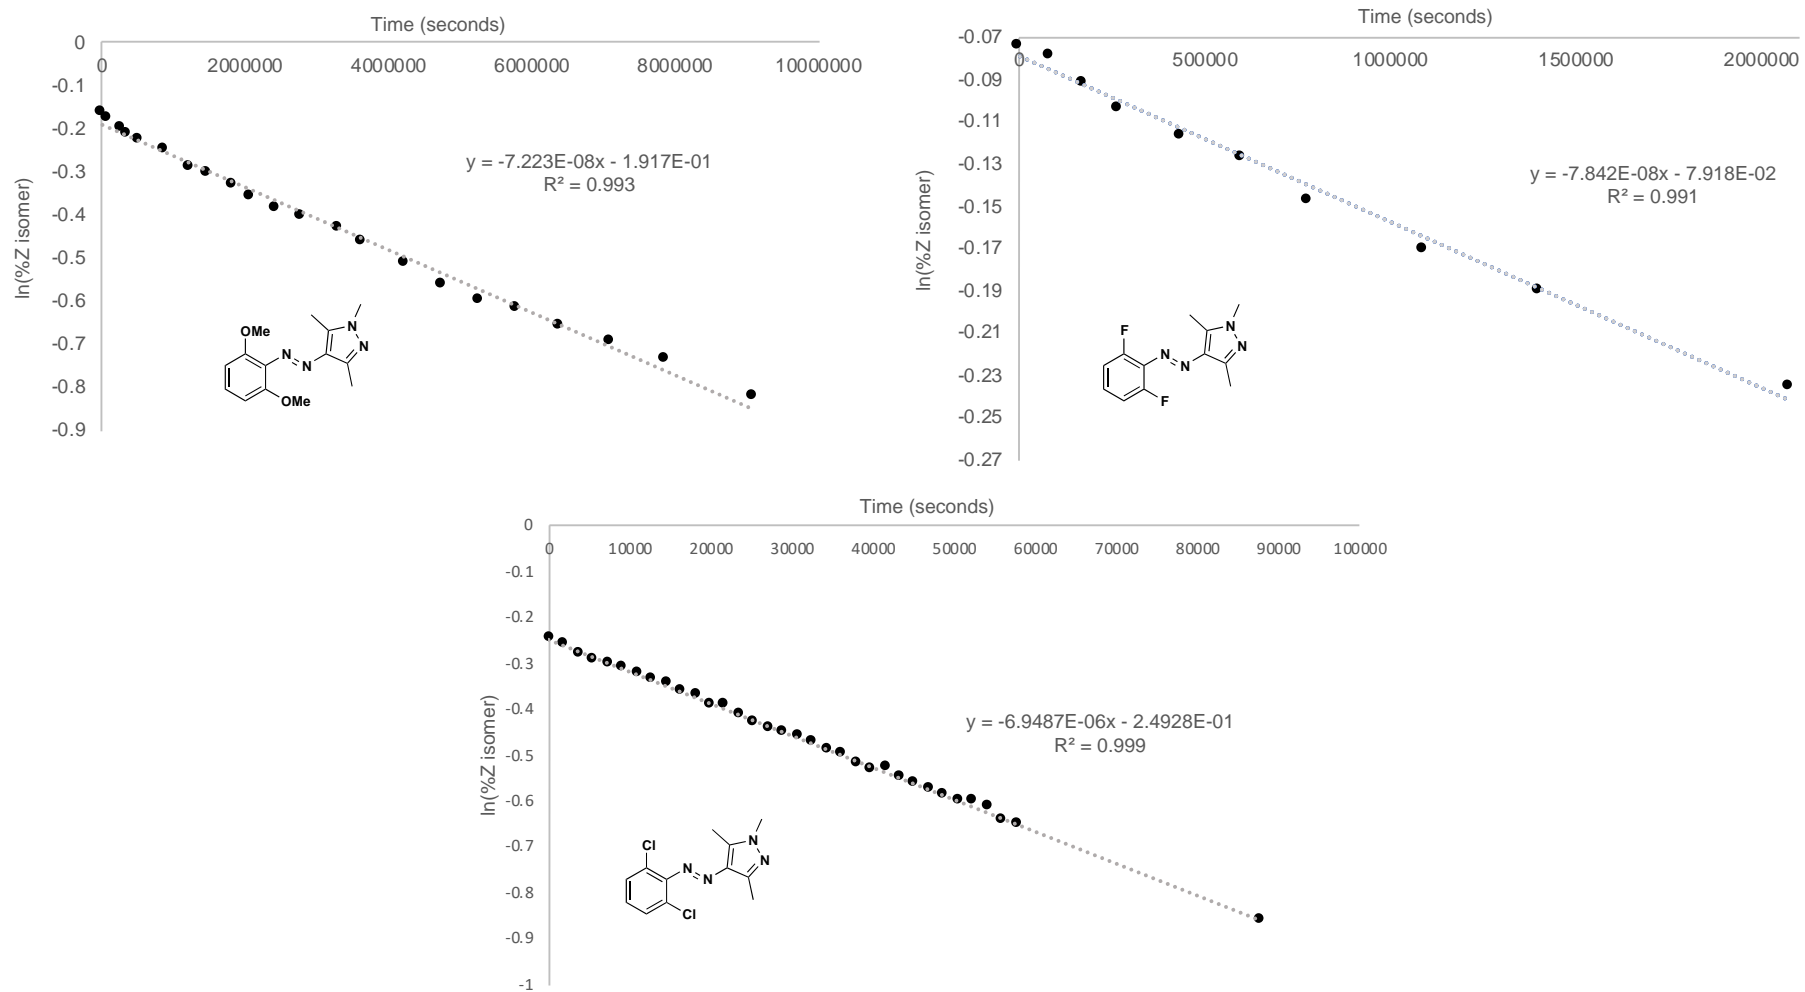

**Figure S14.** *Z*→*E* thermal isomerisation kinetics of **4pzMe-OMe2**, **4pzMe-F2** and **4pzMe-Cl2** in MeCN-*d*<sub>3</sub> at ≈ 20 mM.

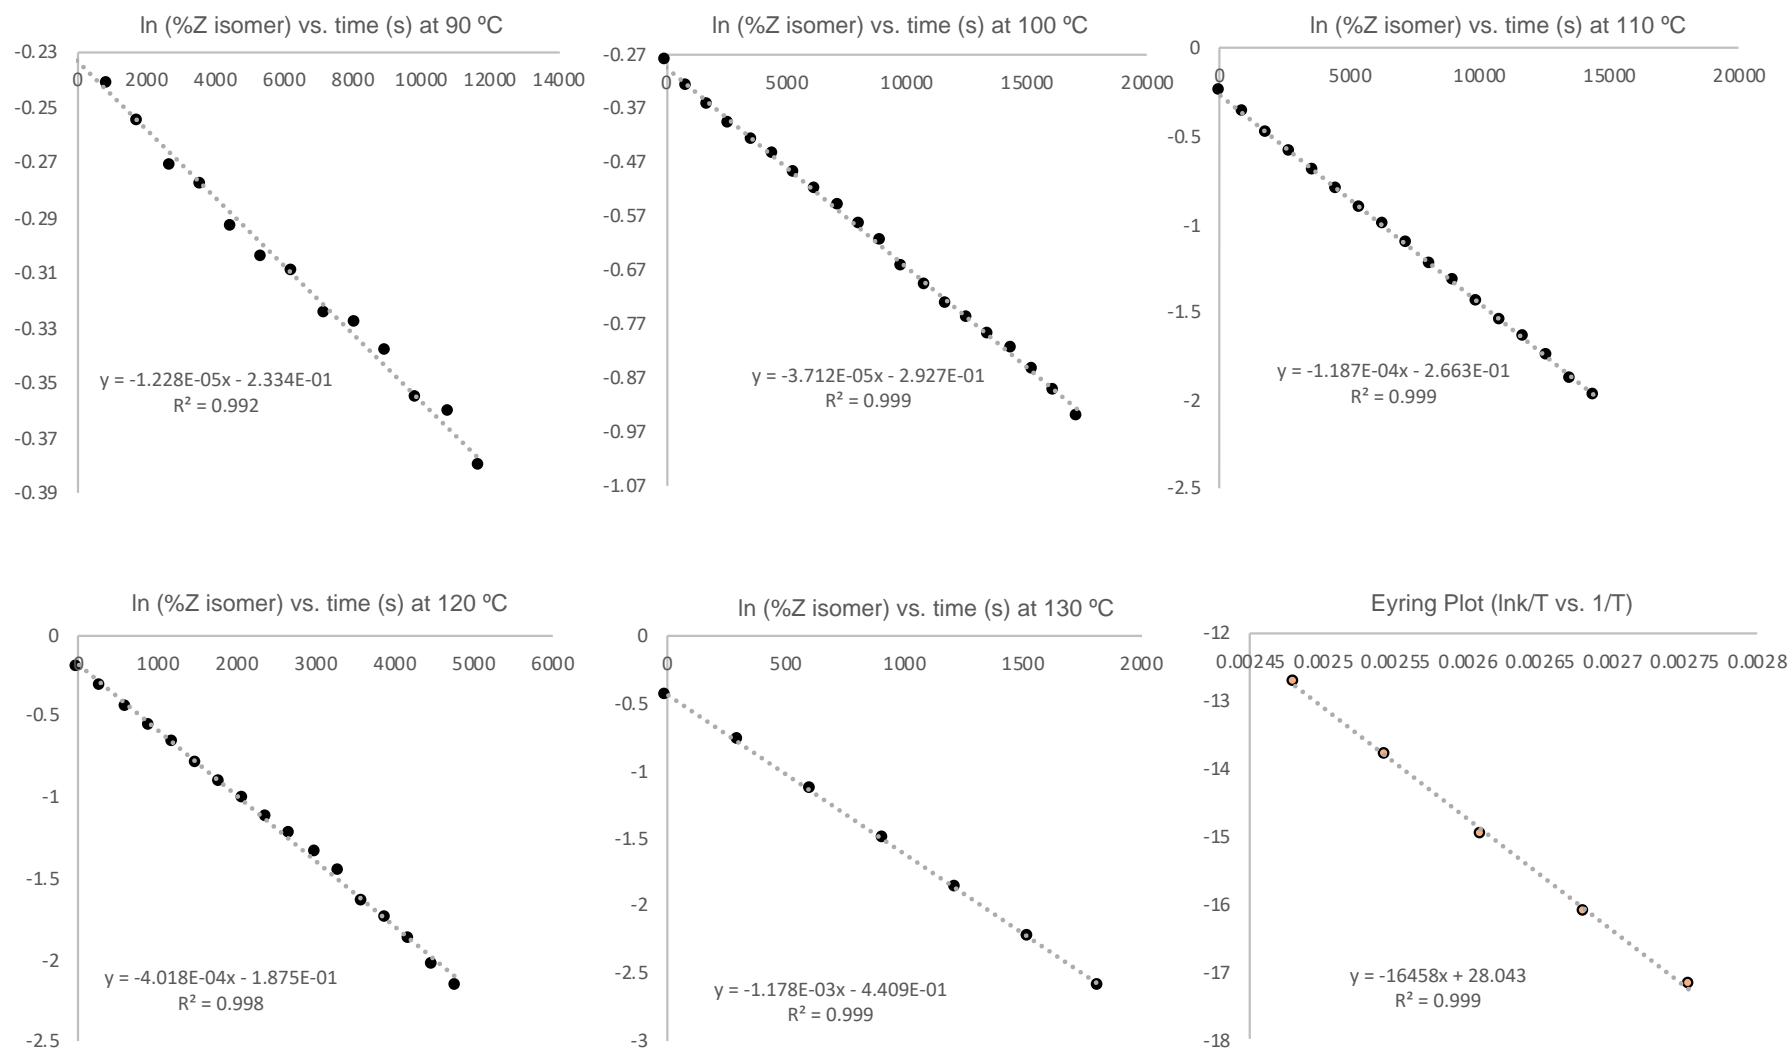

**Figure S15.** Z→E thermal isomerisation kinetics of **4pzH-F2** in DMSO-*d*<sub>6</sub> at ≈ 20 mM for a range of temperatures. An Eyring plot is also included for extrapolation to 25 °C.

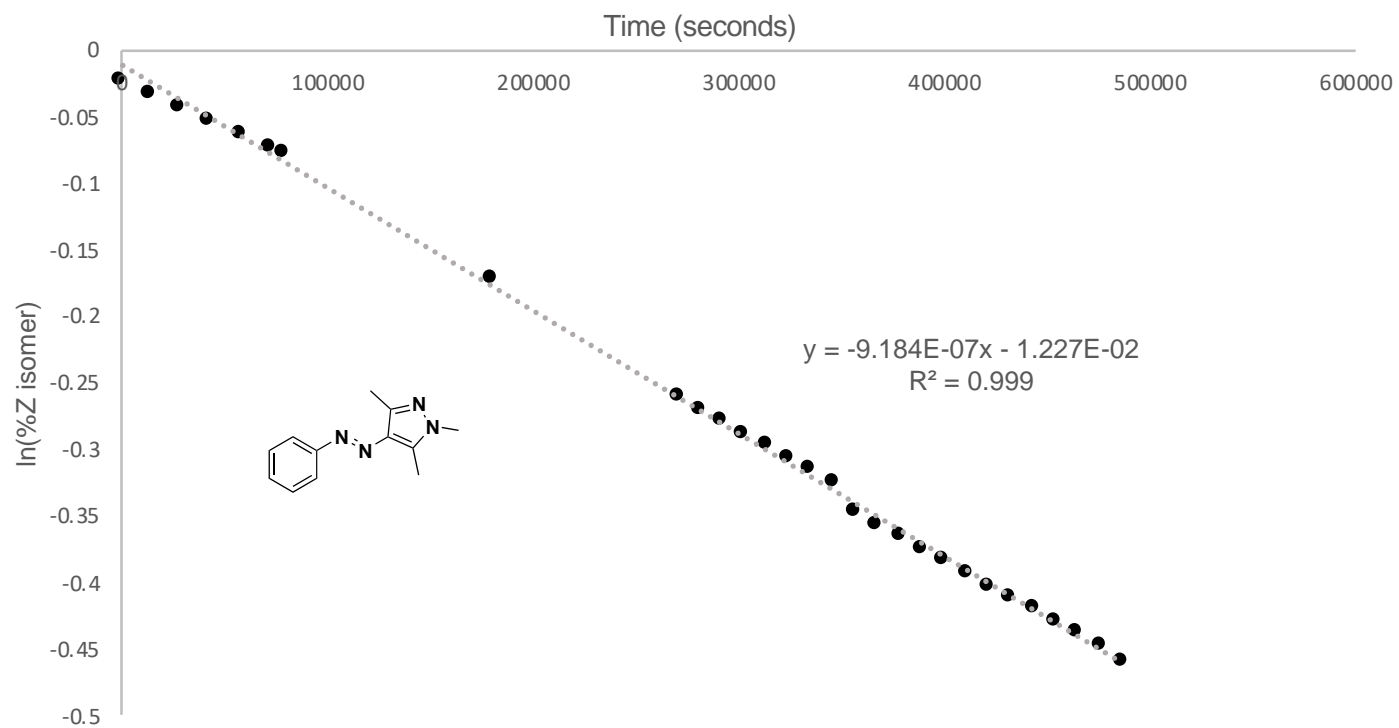

**Figure S16** Z→E thermal isomerisation kinetics of **4pzMe** in DMSO-*d*<sub>6</sub> at ≈ 20 mM.



## X-Ray crystallography

### The X-ray crystal structure of 4pzH-F2

*Crystal data for 4pzH-F2:* C<sub>10</sub>H<sub>8</sub>F<sub>2</sub>N<sub>4</sub>,  $M = 222.20$ , monoclinic,  $P2_1/c$  (no. 14),  $a = 19.826(3)$ ,  $b = 3.9279(4)$ ,  $c = 13.2624(17)$  Å,  $\beta = 109.525(15)^\circ$ ,  $V = 973.4(2)$  Å<sup>3</sup>,  $Z = 4$ ,  $D_c = 1.516$  g cm<sup>-3</sup>,  $\mu(\text{Mo-K}\alpha) = 0.124$  mm<sup>-1</sup>,  $T = 173$  K, yellow tabular needles, Agilent Xcalibur 3 E diffractometer; 2044 independent measured reflections ( $R_{\text{int}} = 0.0207$ ),  $F^2$  refinement [4,5],  $R_1(\text{obs}) = 0.0403$ ,  $wR_2(\text{all}) = 0.1004$ , 1675 independent observed absorption-corrected reflections [ $|F_o| > 4\sigma(|F_o|)$ ], completeness to  $\theta_{\text{full}}(25.2^\circ) = 99.8\%$ , 146 parameters. CCDC 1956314.

### The X-ray crystal structure of 4pzMe-F2

*Crystal data for 4pzMe-F2:* C<sub>12</sub>H<sub>12</sub>F<sub>2</sub>N<sub>4</sub>,  $M = 250.26$ , monoclinic,  $P2_1/c$  (no. 14),  $a = 9.8817(7)$ ,  $b = 16.6285(11)$ ,  $c = 7.5309(5)$  Å,  $\beta = 103.152(7)^\circ$ ,  $V = 1205.00(15)$  Å<sup>3</sup>,  $Z = 4$ ,  $D_c = 1.379$  g cm<sup>-3</sup>,  $\mu(\text{Mo-K}\alpha) = 0.109$  mm<sup>-1</sup>,  $T = 173$  K, orange blocky needles, Agilent Xcalibur 3 E diffractometer; 2408 independent measured reflections ( $R_{\text{int}} = 0.0200$ ),  $F^2$  refinement [4,5],  $R_1(\text{obs}) = 0.0439$ ,  $wR_2(\text{all}) = 0.1118$ , 1835 independent observed absorption-corrected reflections [ $|F_o| > 4\sigma(|F_o|)$ ], completeness to  $\theta_{\text{full}}(25.2^\circ) = 99.0\%$ , 167 parameters. CCDC 1941406.

### The X-ray crystal structure of 4pzMe-OMe2

*Crystal data for 4pzMe-OMe2:* C<sub>14</sub>H<sub>18</sub>N<sub>4</sub>O<sub>2</sub>,  $M = 274.32$ , monoclinic,  $P2_1/c$  (no. 14),  $a = 7.0910(4)$ ,  $b = 20.3120(9)$ ,  $c = 10.3246(6)$  Å,  $\beta = 103.879(6)^\circ$ ,  $V = 1443.67(14)$  Å<sup>3</sup>,  $Z = 4$ ,  $D_c = 1.262$  g cm<sup>-3</sup>,  $\mu(\text{Mo-K}\alpha) = 0.087$  mm<sup>-1</sup>,  $T = 173$  K, yellow blocky needles, Agilent Xcalibur 3 E diffractometer; 2913 independent measured reflections ( $R_{\text{int}} =$

0.0228),  $F^2$  refinement [4,5],  $R_1(\text{obs}) = 0.0483$ ,  $wR_2(\text{all}) = 0.1185$ , 2211 independent observed absorption-corrected reflections [ $|F_o| > 4\sigma(|F_o|)$ ], completeness to  $\theta_{\text{full}}(25.2^\circ) = 99.0\%$ ], 186 parameters. CCDC 1941407.

### The X-ray crystal structure of 4pzMe-OMe2\_diethylether

Crystal data for **4pzMe-OMe2\_diethylether**:  $\text{C}_{14}\text{H}_{18}\text{N}_4\text{O}_2$ ,  $M = 274.32$ , monoclinic,  $P2_1/c$  (no. 14),  $a = 7.0836(4)$ ,  $b = 20.2850(12)$ ,  $c = 10.3061(6)$  Å,  $\beta = 103.825(5)^\circ$ ,  $V = 1437.99(14)$  Å<sup>3</sup>,  $Z = 4$ ,  $D_c = 1.267$  g cm<sup>-3</sup>,  $\mu(\text{Mo-K}\alpha) = 0.088$  mm<sup>-1</sup>,  $T = 173$  K, yellow blocky needles, Agilent Xcalibur 3 E diffractometer; 2881 independent measured reflections ( $R_{\text{int}} = 0.0220$ ),  $F^2$  refinement [4,5],  $R_1(\text{obs}) = 0.0484$ ,  $wR_2(\text{all}) = 0.1223$ , 2201 independent observed absorption-corrected reflections [ $|F_o| > 4\sigma(|F_o|)$ ], completeness to  $\theta_{\text{full}}(25.2^\circ) = 98.7\%$ ], 187 parameters. CCDC 1941801.

Crystallization of **4pzMe-OMe2** from diethyl ether rather than ethyl acetate has led to an unchanged structure.

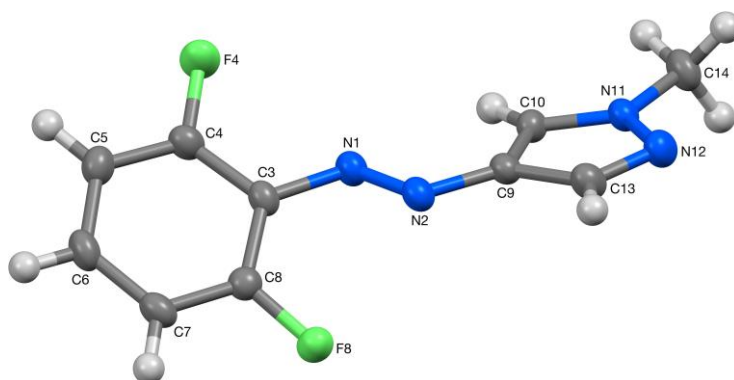

**Figure S17.** The crystal structure of **4pzH-F2** (50% probability ellipsoids).

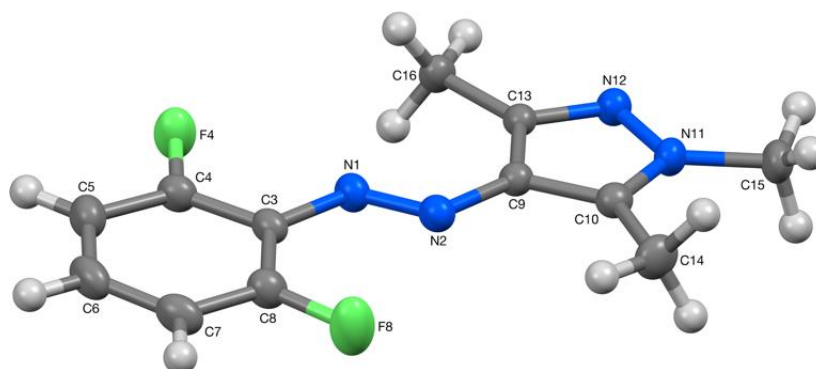

**Figure S18.** The crystal structure of **4pzMe-F2** (50% probability ellipsoids).

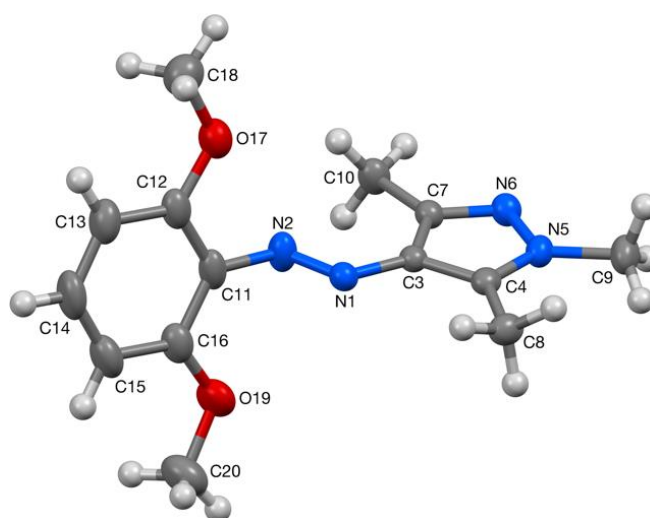

**Figure S19.** The crystal structure of **4pzMe-OMe2** (50% probability ellipsoids).

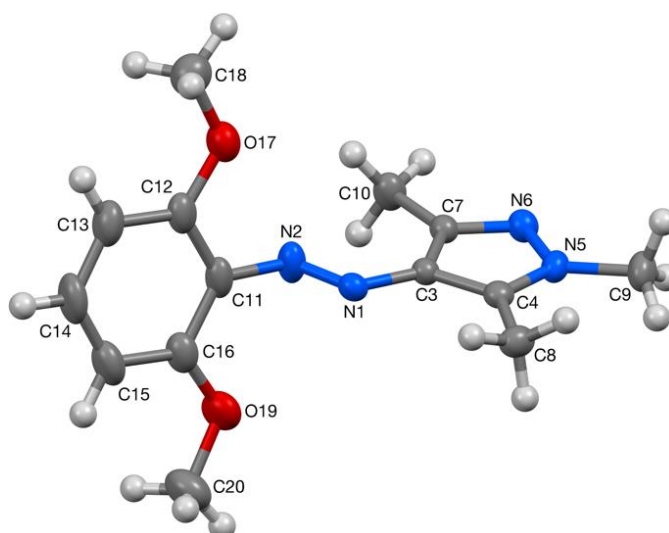

**Figure S20.** The crystal structure of **4pzMe-OMe2\_diethylether** (50% probability ellipsoids).

## Cartesian coordinates for all the optimized structures

24

4pzH-cis-m ; E = -605.348392323 Hartree

|   |           |           |           |
|---|-----------|-----------|-----------|
| C | -1.882050 | -0.345931 | -1.210606 |
| C | -2.609669 | 0.839330  | -1.204569 |
| C | -1.498487 | -0.925379 | -0.000308 |
| H | -2.899926 | 1.294761  | -2.146949 |
| C | -2.967157 | 1.440902  | 0.000606  |
| C | -1.881714 | -0.346652 | 1.210447  |
| H | -1.592351 | -0.823717 | 2.141641  |
| C | -2.609355 | 0.838598  | 1.205320  |
| H | -2.899370 | 1.293449  | 2.148054  |
| H | -1.592949 | -0.822459 | -2.142157 |
| N | -0.778837 | -2.153036 | -0.000753 |
| N | 0.471489  | -2.154533 | -0.000570 |
| C | 1.258694  | -0.999501 | -0.000216 |
| C | 1.042663  | 0.386039  | -0.000188 |
| C | 2.670409  | -1.120861 | 0.000455  |
| N | 3.270877  | 0.054504  | 0.000818  |
| N | 2.260989  | 0.948617  | 0.000541  |
| C | 2.575873  | 2.356439  | -0.000787 |
| H | 3.152414  | 2.605860  | -0.894264 |
| H | 1.646795  | 2.926981  | 0.006830  |
| H | 3.165704  | 2.603615  | 0.884498  |
| H | 0.149380  | 0.989569  | -0.000597 |
| H | 3.239996  | -2.039995 | 0.000804  |
| H | -3.536575 | 2.365166  | 0.000963  |

24

4pzH-cis-n ; E = -605.347923951 Hartree

|   |           |           |           |
|---|-----------|-----------|-----------|
| C | -2.053256 | 0.312559  | 1.210337  |
| C | -2.879167 | -0.806213 | 1.204672  |
| C | -1.622794 | 0.856583  | -0.000050 |
| H | -3.203642 | -1.237259 | 2.147270  |
| C | -3.288204 | -1.374222 | 0.000134  |
| C | -2.053027 | 0.312177  | -1.210355 |
| H | -1.724359 | 0.761891  | -2.142096 |
| C | -2.878923 | -0.806600 | -1.204511 |
| H | -3.203251 | -1.237943 | -2.147023 |
| H | -1.724838 | 0.762578  | 2.142016  |
| N | -0.815698 | 2.029983  | -0.000202 |
| N | 0.430766  | 1.948201  | -0.000141 |
| C | 1.139001  | 0.740510  | -0.000041 |
| C | 2.529644  | 0.802747  | 0.000010  |
| C | 0.861890  | -0.661579 | -0.000140 |
| N | 1.980662  | -1.365193 | -0.000154 |
| N | 2.978973  | -0.457660 | -0.000044 |
| C | 4.344546  | -0.920264 | 0.000342  |
| H | 4.530393  | -1.527250 | -0.888416 |
| H | 5.011377  | -0.057610 | -0.000730 |
| H | 4.530696  | -1.525282 | 0.890392  |
| H | 3.180207  | 1.664848  | 0.000034  |
| H | -0.085740 | -1.177307 | -0.000247 |
| H | -3.932010 | -2.248185 | 0.000196  |

24

4pzH-trans-m ; E = -605.365368227 Hartree

|   |          |           |          |
|---|----------|-----------|----------|
| C | 2.652522 | -1.347327 | 0.000392 |
| C | 4.039866 | -1.260794 | 0.000279 |

|   |           |           |           |
|---|-----------|-----------|-----------|
| C | 1.875512  | -0.187026 | 0.000065  |
| H | 4.639892  | -2.165773 | 0.000613  |
| C | 4.655875  | -0.012829 | -0.000226 |
| C | 2.496247  | 1.069078  | -0.000471 |
| H | 1.873372  | 1.956774  | -0.000721 |
| C | 3.879851  | 1.148596  | -0.000599 |
| H | 4.363580  | 2.121200  | -0.000974 |
| H | 2.141296  | -2.304989 | 0.000801  |
| N | 0.479149  | -0.391081 | 0.000236  |
| N | -0.198440 | 0.669437  | 0.000425  |
| C | -1.567541 | 0.464908  | 0.000281  |
| C | -2.316651 | -0.709802 | -0.000119 |
| C | -2.533757 | 1.496361  | 0.000588  |
| N | -3.764816 | 1.009933  | 0.000131  |
| N | -3.604044 | -0.328655 | -0.000134 |
| C | -4.775045 | -1.170094 | -0.000603 |
| H | -5.375761 | -0.968643 | -0.890332 |
| H | -4.461673 | -2.214390 | -0.000116 |
| H | -5.376753 | -0.968105 | 0.888324  |
| H | -2.006553 | -1.743034 | -0.000374 |
| H | -2.361118 | 2.563894  | 0.000949  |
| H | 5.739501  | 0.059208  | -0.000308 |

24

4pzH-trans-n ; E = -605.365601144 Hartree

|   |           |           |           |
|---|-----------|-----------|-----------|
| C | 2.851801  | 1.236311  | -0.000281 |
| C | 4.217150  | 0.975383  | -0.000317 |
| C | 1.934828  | 0.183164  | 0.000006  |
| H | 4.926419  | 1.797532  | -0.000619 |
| C | 4.671026  | -0.340252 | 0.000012  |
| C | 2.392362  | -1.141078 | 0.000356  |
| H | 1.662662  | -1.943280 | 0.000578  |
| C | 3.754895  | -1.394650 | 0.000348  |
| H | 4.112323  | -2.420464 | 0.000589  |
| H | 2.464845  | 2.250522  | -0.000550 |
| N | 0.575638  | 0.563024  | 0.000023  |
| N | -0.231018 | -0.402807 | -0.000302 |
| C | -1.561103 | -0.019630 | -0.000040 |
| C | -2.618082 | -0.920272 | -0.000407 |
| C | -2.184992 | 1.255032  | 0.000451  |
| N | -3.501600 | 1.142243  | 0.000395  |
| N | -3.743455 | -0.185196 | 0.000005  |
| C | -5.108284 | -0.647651 | -0.000164 |
| H | -5.625721 | -0.281276 | -0.889768 |
| H | -5.113355 | -1.738105 | 0.000184  |
| H | -5.626050 | -0.280702 | 0.889004  |
| H | -2.622829 | -2.000031 | -0.000832 |
| H | -1.709813 | 2.225065  | 0.000789  |
| H | 5.736954  | -0.548248 | -0.000004 |

24

4pzHCl1A-cis-m ; E = -1064.78465959 Hartree

|   |           |           |           |
|---|-----------|-----------|-----------|
| C | -1.784226 | -0.314976 | -0.487012 |
| C | -2.470328 | 0.798685  | -0.960625 |
| C | -1.282505 | -0.341888 | 0.816935  |
| H | -2.844023 | 0.795608  | -1.979070 |
| C | -2.665124 | 1.896295  | -0.128377 |
| C | -1.506931 | 0.755408  | 1.650703  |
| H | -1.130201 | 0.714532  | 2.667983  |
| C | -2.186022 | 1.871835  | 1.179609  |

|    |           |           |           |
|----|-----------|-----------|-----------|
| H  | -2.345364 | 2.721427  | 1.836219  |
| Cl | -1.512876 | -1.666779 | -1.539783 |
| N  | -0.647686 | -1.498819 | 1.345802  |
| N  | 0.588864  | -1.652370 | 1.252987  |
| C  | 1.447330  | -0.751057 | 0.626101  |
| C  | 1.325995  | 0.481720  | -0.031707 |
| C  | 2.834236  | -1.033983 | 0.561686  |
| N  | 3.504942  | -0.086958 | -0.066113 |
| N  | 2.566675  | 0.817783  | -0.413985 |
| C  | 2.972311  | 2.000288  | -1.134369 |
| H  | 3.434367  | 1.714386  | -2.081676 |
| H  | 2.093987  | 2.616902  | -1.326638 |
| H  | 3.694736  | 2.564210  | -0.540494 |
| H  | 0.484260  | 1.119698  | -0.246977 |
| H  | 3.335447  | -1.905510 | 0.959458  |
| H  | -3.202294 | 2.762576  | -0.500981 |

24

4pzHCl1A-cis-n ; E = -1064.78460406 Hartree

|    |           |           |           |
|----|-----------|-----------|-----------|
| C  | 1.875732  | -0.557955 | 0.330287  |
| C  | 2.695237  | 0.158929  | 1.195332  |
| C  | 1.403068  | 0.022583  | -0.849331 |
| H  | 3.040351  | -0.312651 | 2.109179  |
| C  | 3.053825  | 1.465946  | 0.882998  |
| C  | 1.792369  | 1.325088  | -1.165234 |
| H  | 1.436770  | 1.758021  | -2.095016 |
| C  | 2.603807  | 2.047545  | -0.299828 |
| H  | 2.887243  | 3.064705  | -0.551279 |
| Cl | 1.407159  | -2.178246 | 0.740004  |
| N  | 0.637779  | -0.721059 | -1.790546 |
| N  | -0.605898 | -0.787711 | -1.702967 |
| C  | -1.356329 | -0.164116 | -0.704983 |
| C  | -2.732733 | -0.373228 | -0.692254 |
| C  | -1.134505 | 0.711437  | 0.402452  |
| N  | -2.269778 | 0.994764  | 1.015376  |
| N  | -3.224761 | 0.324560  | 0.337134  |
| C  | -4.593487 | 0.417901  | 0.781622  |
| H  | -4.904095 | 1.464538  | 0.796373  |
| H  | -5.228389 | -0.142566 | 0.094979  |
| H  | -4.687413 | 0.003263  | 1.787831  |
| H  | -3.344224 | -0.971970 | -1.350928 |
| H  | -0.216655 | 1.144977  | 0.767767  |
| H  | 3.691404  | 2.023201  | 1.561675  |

24

4pzHCl1A-trans-m ; E = -1064.80116010 Hartree

|    |           |           |           |
|----|-----------|-----------|-----------|
| C  | 2.479229  | -0.700889 | 0.000050  |
| C  | 3.849626  | -0.459842 | -0.000050 |
| C  | 1.561033  | 0.359315  | -0.000013 |
| H  | 4.535227  | -1.299880 | 0.000005  |
| C  | 4.318338  | 0.847653  | -0.000252 |
| C  | 2.057091  | 1.670430  | -0.000224 |
| H  | 1.331706  | 2.476892  | -0.000285 |
| C  | 3.419150  | 1.914870  | -0.000346 |
| H  | 3.786064  | 2.936567  | -0.000531 |
| Cl | 1.927198  | -2.345592 | 0.000266  |
| N  | 0.192422  | 0.035431  | 0.000127  |
| N  | -0.574792 | 1.033313  | 0.000438  |
| C  | -1.917174 | 0.704675  | 0.000186  |
| C  | -2.548857 | -0.538131 | -0.000378 |

|   |           |           |           |
|---|-----------|-----------|-----------|
| C | -2.978160 | 1.638845  | 0.000304  |
| N | -4.155480 | 1.035104  | 0.000435  |
| N | -3.865532 | -0.282727 | -0.000133 |
| C | -4.950224 | -1.233392 | -0.000523 |
| H | -5.567366 | -1.089777 | -0.890114 |
| H | -4.537320 | -2.242375 | -0.000418 |
| H | -5.567905 | -1.089803 | 0.888691  |
| H | -2.137274 | -1.535441 | -0.000770 |
| H | -2.910378 | 2.717960  | 0.000616  |
| H | 5.388235  | 1.031854  | -0.000317 |

24

4pzHCl1A-trans-n ; E = -1064.80090683 Hartree

|    |           |           |           |
|----|-----------|-----------|-----------|
| C  | -2.618272 | -0.555208 | -0.000023 |
| C  | -3.942204 | -0.125984 | -0.000052 |
| C  | -1.562412 | 0.368599  | 0.000027  |
| H  | -4.737408 | -0.863161 | -0.000095 |
| C  | -4.225827 | 1.233593  | -0.000012 |
| C  | -1.872779 | 1.735626  | 0.000077  |
| H  | -1.043049 | 2.434253  | 0.000132  |
| C  | -3.187789 | 2.166390  | 0.000058  |
| H  | -3.410049 | 3.229026  | 0.000109  |
| Cl | -2.299187 | -2.259066 | -0.000067 |
| N  | -0.251635 | -0.141439 | 0.000044  |
| N  | 0.644820  | 0.742080  | -0.000023 |
| C  | 1.927623  | 0.228484  | -0.000008 |
| C  | 3.071351  | 1.017302  | -0.000090 |
| C  | 2.417115  | -1.104200 | 0.000178  |
| N  | 3.737654  | -1.125654 | 0.000160  |
| N  | 4.114354  | 0.171097  | 0.000026  |
| C  | 5.519912  | 0.490200  | -0.000146 |
| H  | 5.996052  | 0.071888  | -0.889815 |
| H  | 5.637699  | 1.574243  | 0.000320  |
| H  | 5.996380  | 0.071084  | 0.888961  |
| H  | 3.186500  | 2.090901  | -0.000219 |
| H  | 1.843397  | -2.019393 | 0.000302  |
| H  | -5.260020 | 1.563877  | -0.000044 |

24

4pzHCl1B-cis-m ; E = -1064.78465960 Hartree

|    |           |           |           |
|----|-----------|-----------|-----------|
| C  | -1.505810 | 0.755838  | -1.650777 |
| C  | -2.184374 | 1.872647  | -1.179748 |
| C  | -1.282422 | -0.341686 | -0.817049 |
| H  | -2.342960 | 2.722430  | -1.836295 |
| C  | -2.663869 | 1.897273  | 0.128066  |
| C  | -1.784616 | -0.314588 | 0.486687  |
| Cl | -1.514481 | -1.666823 | 1.539417  |
| C  | -2.470100 | 0.799422  | 0.960300  |
| H  | -2.844103 | 0.796478  | 1.978621  |
| H  | -1.128719 | 0.714868  | -2.667918 |
| N  | -0.647926 | -1.498928 | -1.345772 |
| N  | 0.588634  | -1.652548 | -1.252834 |
| C  | 1.447085  | -0.751280 | -0.625837 |
| C  | 1.326014  | 0.481373  | 0.032177  |
| C  | 2.833990  | -1.034430 | -0.561582 |
| N  | 3.504917  | -0.087645 | 0.066304  |
| N  | 2.566763  | 0.817168  | 0.414479  |
| C  | 2.972754  | 1.999626  | 1.134715  |
| H  | 3.693603  | 2.564555  | 0.539863  |
| H  | 2.094269  | 2.615387  | 1.329000  |

|   |           |           |           |
|---|-----------|-----------|-----------|
| H | 3.436795  | 1.713520  | 2.080978  |
| H | 0.484351  | 1.119445  | 0.247658  |
| H | 3.334861  | -1.906099 | -0.959537 |
| H | -3.200535 | 2.763903  | 0.500591  |

24

4pzHCl1B-cis-n ; E = -1064.78460407 Hartree

|    |           |           |           |
|----|-----------|-----------|-----------|
| C  | -1.792413 | 1.324891  | -1.165414 |
| C  | -2.603676 | 2.047510  | -0.299958 |
| C  | -1.403099 | 0.022434  | -0.849363 |
| H  | -2.887093 | 3.064651  | -0.551519 |
| C  | -3.053513 | 1.466120  | 0.883020  |
| C  | -1.875609 | -0.557901 | 0.330432  |
| Cl | -1.407045 | -2.178300 | 0.740285  |
| C  | -2.694951 | 0.159116  | 1.195497  |
| H  | -3.039963 | -0.312325 | 2.109452  |
| H  | -1.436967 | 1.757711  | -2.095302 |
| N  | -0.637867 | -0.721378 | -1.790508 |
| N  | 0.605808  | -0.788048 | -1.702879 |
| C  | 1.356199  | -0.164256 | -0.705010 |
| C  | 2.732570  | -0.373581 | -0.692018 |
| C  | 1.134446  | 0.712025  | 0.401877  |
| N  | 2.269674  | 0.995454  | 1.014800  |
| N  | 3.224615  | 0.324569  | 0.337089  |
| C  | 4.593272  | 0.417845  | 0.781774  |
| H  | 4.686873  | 0.003893  | 1.788294  |
| H  | 5.228183  | -0.143272 | 0.095664  |
| H  | 4.904151  | 1.464411  | 0.795849  |
| H  | 3.343966  | -0.972831 | -1.350313 |
| H  | 0.216631  | 1.145960  | 0.766798  |
| H  | -3.690970 | 2.023507  | 1.561703  |

24

4pzHCl1B-trans-m ; E = -1064.79441682 Hartree

|    |           |           |           |
|----|-----------|-----------|-----------|
| C  | -2.226575 | 1.839027  | 0.122927  |
| C  | -3.605701 | 1.934387  | 0.212002  |
| C  | -1.578960 | 0.603895  | -0.006731 |
| H  | -4.077582 | 2.904109  | 0.333080  |
| C  | -4.376619 | 0.777991  | 0.130064  |
| C  | -2.372916 | -0.553111 | -0.109835 |
| Cl | -1.705359 | -2.126682 | -0.406136 |
| C  | -3.760483 | -0.455249 | -0.044849 |
| H  | -4.350644 | -1.360603 | -0.137627 |
| H  | -1.593527 | 2.719745  | 0.166225  |
| N  | -0.175572 | 0.693309  | -0.087876 |
| N  | 0.449098  | -0.286122 | 0.392843  |
| C  | 1.824758  | -0.186782 | 0.278805  |
| C  | 2.628922  | 0.789275  | -0.306628 |
| C  | 2.738320  | -1.142950 | 0.777194  |
| N  | 3.989948  | -0.794420 | 0.527124  |
| N  | 3.894378  | 0.379658  | -0.130579 |
| C  | 5.104671  | 1.036563  | -0.559173 |
| H  | 5.655489  | 0.387741  | -1.243701 |
| H  | 4.843826  | 1.965802  | -1.066287 |
| H  | 5.732931  | 1.255554  | 0.306963  |
| H  | 2.370295  | 1.704904  | -0.815371 |
| H  | 2.512240  | -2.060346 | 1.302645  |
| H  | -5.459388 | 0.831444  | 0.185154  |

24

4pzHCl1B-trans-n ; E = -1064.79503623 Hartree



|    |           |           |           |
|----|-----------|-----------|-----------|
| C  | 2.458437  | 1.738206  | -0.093570 |
| C  | 3.831529  | 1.671111  | -0.264339 |
| C  | 1.673523  | 0.585366  | 0.036154  |
| H  | 4.410234  | 2.581512  | -0.382447 |
| C  | 4.459375  | 0.428562  | -0.267113 |
| C  | 2.325603  | -0.661218 | 0.052608  |
| Cl | 1.490388  | -2.155647 | 0.338622  |
| C  | 3.708637  | -0.728078 | -0.094306 |
| H  | 4.188577  | -1.700427 | -0.066591 |
| H  | 1.935565  | 2.689086  | -0.068319 |
| N  | 0.298890  | 0.841255  | 0.205465  |
| N  | -0.467492 | -0.039704 | -0.260202 |
| C  | -1.810186 | 0.227811  | -0.060611 |
| C  | -2.825238 | -0.604862 | -0.513531 |
| C  | -2.489047 | 1.293766  | 0.585040  |
| N  | -3.798342 | 1.126858  | 0.530121  |
| N  | -3.980546 | -0.030813 | -0.140627 |
| C  | -5.323401 | -0.502309 | -0.369008 |
| H  | -5.883166 | 0.235764  | -0.947854 |
| H  | -5.280218 | -1.441582 | -0.921142 |
| H  | -5.828429 | -0.663501 | 0.586046  |
| H  | -2.778673 | -1.536737 | -1.057033 |
| H  | -2.059166 | 2.154411  | 1.075994  |
| H  | 5.535720  | 0.354162  | -0.386477 |

24

4pzHCl2-cis-m ; E = -1524.21983515 Hartree

|    |           |           |           |
|----|-----------|-----------|-----------|
| C  | -1.564851 | -1.198326 | -0.079181 |
| C  | -2.272919 | -1.206711 | -1.275136 |
| C  | -1.188916 | 0.000054  | 0.537176  |
| H  | -2.542378 | -2.155285 | -1.725966 |
| C  | -2.623860 | -0.000322 | -1.871112 |
| C  | -1.564942 | 1.198229  | -0.079488 |
| Cl | -1.104570 | 2.700598  | 0.651619  |
| C  | -2.273013 | 1.206252  | -1.275443 |
| H  | -2.542559 | 2.154671  | -1.726546 |
| Cl | -1.104349 | -2.700460 | 0.652260  |
| N  | -0.578397 | 0.000190  | 1.819840  |
| N  | 0.662931  | 0.000254  | 1.952250  |
| C  | 1.564234  | 0.000171  | 0.894234  |
| C  | 1.482408  | 0.000076  | -0.506060 |
| C  | 2.957323  | 0.000296  | 1.153154  |
| N  | 3.666760  | 0.000285  | 0.041170  |
| N  | 2.747980  | 0.000199  | -0.947098 |
| C  | 3.200142  | -0.000673 | -2.317476 |
| H  | 3.801575  | -0.892415 | -2.506028 |
| H  | 2.332411  | 0.003024  | -2.977452 |
| H  | 3.808070  | 0.886915  | -2.504567 |
| H  | 0.652405  | -0.000076 | -1.193761 |
| H  | 3.434976  | 0.000487  | 2.123075  |
| H  | -3.181440 | -0.000437 | -2.801846 |

24

4pzHCl2-cis-n ; E = -1524.22011144 Hartree

|   |          |           |           |
|---|----------|-----------|-----------|
| C | 1.703410 | -1.198416 | 0.052264  |
| C | 2.531352 | -1.207649 | 1.168087  |
| C | 1.265434 | -0.000140 | -0.520308 |
| H | 2.842707 | -2.156281 | 1.590688  |
| C | 2.942768 | -0.001602 | 1.724174  |
| C | 1.704996 | 1.197360  | 0.052630  |

|    |           |           |           |
|----|-----------|-----------|-----------|
| C1 | 1.173458  | 2.700341  | -0.629038 |
| C  | 2.532902  | 1.205160  | 1.168500  |
| H  | 2.845464  | 2.153241  | 1.591445  |
| C1 | 1.170023  | -2.700522 | -0.629881 |
| N  | 0.528327  | 0.000511  | -1.735765 |
| N  | -0.719181 | 0.000821  | -1.743558 |
| C  | -1.508724 | 0.000707  | -0.597239 |
| C  | -2.893063 | 0.000746  | -0.748187 |
| C  | -1.319362 | 0.000739  | 0.819156  |
| N  | -2.479283 | 0.000762  | 1.449751  |
| N  | -3.419133 | 0.000745  | 0.480642  |
| C  | -4.811251 | 0.000611  | 0.858118  |
| H  | -5.032874 | 0.889997  | 1.451734  |
| H  | -5.423160 | 0.001100  | -0.044172 |
| H  | -5.033004 | -0.889334 | 1.450856  |
| H  | -3.487181 | 0.000756  | -1.649973 |
| H  | -0.407745 | 0.000768  | 1.396065  |
| H  | 3.590732  | -0.002148 | 2.594309  |

24

4pzHCl2-trans-m ; E = -1524.22919333 Hartree

|    |           |           |           |
|----|-----------|-----------|-----------|
| C  | -2.231681 | 1.223758  | 0.044216  |
| C  | -3.616174 | 1.156148  | 0.095017  |
| C  | -1.430266 | 0.075239  | -0.054405 |
| H  | -4.191662 | 2.069467  | 0.192566  |
| C  | -4.236575 | -0.084985 | 0.018452  |
| C  | -2.089189 | -1.163679 | -0.137343 |
| C1 | -1.209849 | -2.640081 | -0.364977 |
| C  | -3.477832 | -1.241160 | -0.106729 |
| H  | -3.951428 | -2.213173 | -0.185248 |
| C1 | -1.463253 | 2.776284  | 0.148704  |
| N  | -0.042431 | 0.267273  | -0.179616 |
| N  | 0.654075  | -0.508563 | 0.521223  |
| C  | 2.016782  | -0.340496 | 0.357232  |
| C  | 2.737666  | 0.543059  | -0.444660 |
| C  | 3.004637  | -1.090292 | 1.034899  |
| N  | 4.222617  | -0.710684 | 0.686673  |
| N  | 4.030776  | 0.280660  | -0.209835 |
| C  | 5.183890  | 0.922751  | -0.792199 |
| H  | 5.786473  | 0.185116  | -1.326500 |
| H  | 4.848105  | 1.693662  | -1.486062 |
| H  | 5.790264  | 1.376132  | -0.005175 |
| H  | 2.402382  | 1.305944  | -1.130286 |
| H  | 2.855012  | -1.884386 | 1.753106  |
| H  | -5.319204 | -0.151080 | 0.048247  |

24

4pzHCl2-trans-n ; E = -1524.22941741 Hartree

|    |           |           |           |
|----|-----------|-----------|-----------|
| C  | 2.399324  | 1.082976  | -0.075032 |
| C  | 3.756514  | 0.850902  | -0.243760 |
| C  | 1.474461  | 0.035912  | 0.065344  |
| H  | 4.429508  | 1.691430  | -0.368140 |
| C  | 4.224979  | -0.457414 | -0.247732 |
| C  | 1.981724  | -1.274848 | 0.063218  |
| C1 | 0.949402  | -2.642584 | 0.329865  |
| C  | 3.343262  | -1.517854 | -0.085888 |
| H  | 3.699236  | -2.541722 | -0.069461 |
| C1 | 1.819868  | 2.717959  | -0.079902 |
| N  | 0.134739  | 0.386754  | 0.312763  |
| N  | -0.702504 | -0.270756 | -0.353954 |

|   |           |           |           |
|---|-----------|-----------|-----------|
| C | -2.016681 | 0.049871  | -0.068961 |
| C | -3.098735 | -0.556120 | -0.694789 |
| C | -2.600533 | 0.979843  | 0.830358  |
| N | -3.918356 | 0.943815  | 0.759398  |
| N | -4.199259 | 0.004811  | -0.171059 |
| C | -5.578134 | -0.278201 | -0.482680 |
| H | -6.067874 | 0.625616  | -0.851746 |
| H | -5.616751 | -1.052836 | -1.249045 |
| H | -6.097651 | -0.624648 | 0.413457  |
| H | -3.132081 | -1.326072 | -1.451120 |
| H | -2.096932 | 1.655895  | 1.505667  |
| H | 5.285523  | -0.651806 | -0.369478 |

24

4pzHF1A-cis-m ; E = -704.489806843 Hartree

|   |           |           |           |
|---|-----------|-----------|-----------|
| C | -1.618915 | -0.268511 | -0.929200 |
| C | -2.366425 | 0.876757  | -1.139204 |
| C | -1.416494 | -0.789089 | 0.349940  |
| H | -2.489471 | 1.244522  | -2.152377 |
| C | -2.934712 | 1.526414  | -0.044982 |
| C | -2.018152 | -0.147806 | 1.431201  |
| H | -1.881154 | -0.569205 | 2.422230  |
| C | -2.760336 | 1.014165  | 1.237916  |
| H | -3.211378 | 1.512079  | 2.090301  |
| F | -1.043781 | -0.881993 | -1.970051 |
| N | -0.717125 | -2.015032 | 0.535597  |
| N | 0.529164  | -2.059720 | 0.453752  |
| C | 1.343404  | -0.946713 | 0.246856  |
| C | 1.178474  | 0.444781  | 0.270246  |
| C | 2.730417  | -1.119289 | 0.016407  |
| N | 3.360082  | 0.034315  | -0.105646 |
| N | 2.397918  | 0.964111  | 0.061007  |
| C | 2.758761  | 2.359636  | 0.000312  |
| H | 3.182879  | 2.588857  | -0.979642 |
| H | 1.866031  | 2.964057  | 0.162867  |
| H | 3.499570  | 2.583188  | 0.770960  |
| H | 0.321648  | 1.078320  | 0.434399  |
| H | 3.260755  | -2.057774 | -0.067175 |
| H | -3.521255 | 2.426110  | -0.201019 |

24

4pzHF1A-cis-n ; E = -704.490084156 Hartree

|   |           |           |           |
|---|-----------|-----------|-----------|
| C | 1.627235  | 0.064769  | 0.967894  |
| C | 2.478239  | 1.155228  | 0.974319  |
| C | 1.546948  | -0.799412 | -0.125878 |
| H | 2.497174  | 1.800386  | 1.846132  |
| C | 3.277954  | 1.398182  | -0.140113 |
| C | 2.381576  | -0.564561 | -1.217567 |
| H | 2.341204  | -1.255897 | -2.053514 |
| C | 3.227701  | 0.539765  | -1.235196 |
| H | 3.856051  | 0.722326  | -2.100982 |
| F | 0.839267  | -0.162082 | 2.026846  |
| N | 0.756559  | -1.982065 | -0.077930 |
| N | -0.491475 | -1.931787 | -0.050873 |
| C | -1.229353 | -0.752992 | -0.173046 |
| C | -2.595758 | -0.783706 | 0.085714  |
| C | -0.996108 | 0.583217  | -0.616517 |
| N | -2.115036 | 1.286011  | -0.614268 |
| N | -3.069941 | 0.441356  | -0.174505 |
| C | -4.415876 | 0.931344  | -0.008826 |

|   |           |           |           |
|---|-----------|-----------|-----------|
| H | -4.734213 | 1.428091  | -0.926935 |
| H | -5.077187 | 0.090008  | 0.200447  |
| H | -4.460447 | 1.645070  | 0.817703  |
| H | -3.214380 | -1.596816 | 0.435461  |
| H | -0.081688 | 1.045004  | -0.956345 |
| H | 3.943982  | 2.254970  | -0.145265 |

24

4pzHF1A-trans-m ; E = -704.507068932 Hartree

|   |           |           |           |
|---|-----------|-----------|-----------|
| C | -2.559657 | 1.027647  | 0.000121  |
| C | -3.939131 | 0.887783  | 0.000050  |
| C | -1.703904 | -0.079762 | -0.000015 |
| H | -4.556897 | 1.779082  | 0.000185  |
| C | -4.487448 | -0.389167 | -0.000187 |
| C | -2.280076 | -1.357426 | -0.000264 |
| H | -1.609484 | -2.209831 | -0.000390 |
| C | -3.656631 | -1.511846 | -0.000346 |
| H | -4.089606 | -2.507200 | -0.000542 |
| F | -2.038957 | 2.256660  | 0.000362  |
| N | -0.323462 | 0.188307  | 0.000058  |
| N | 0.396270  | -0.845320 | 0.000328  |
| C | 1.754069  | -0.581756 | 0.000165  |
| C | 2.448656  | 0.626488  | -0.000232 |
| C | 2.766215  | -1.568420 | 0.000374  |
| N | 3.973371  | -1.026083 | 0.000258  |
| N | 3.751381  | 0.304320  | -0.000101 |
| C | 4.882932  | 1.198327  | -0.000441 |
| H | 5.492127  | 1.024070  | -0.890101 |
| H | 4.522125  | 2.227143  | -0.000078 |
| H | 5.492863  | 1.023698  | 0.888634  |
| H | 2.090073  | 1.644158  | -0.000537 |
| H | 2.642863  | -2.642588 | 0.000688  |
| H | -5.566517 | -0.508247 | -0.000257 |

24

4pzHF1A-trans-n ; E = -704.506971171 Hartree

|   |           |           |           |
|---|-----------|-----------|-----------|
| C | 2.730435  | 0.902208  | -0.000064 |
| C | 4.079637  | 0.581733  | -0.000051 |
| C | 1.736597  | -0.083328 | 0.000001  |
| H | 4.809038  | 1.384222  | -0.000101 |
| C | 4.455518  | -0.756103 | 0.000024  |
| C | 2.140224  | -1.425529 | 0.000077  |
| H | 1.363552  | -2.182528 | 0.000129  |
| C | 3.484454  | -1.759945 | 0.000084  |
| H | 3.782976  | -2.803577 | 0.000141  |
| F | 2.376596  | 2.188162  | -0.000118 |
| N | 0.403328  | 0.364086  | 0.000019  |
| N | -0.444885 | -0.566738 | -0.000106 |
| C | -1.754787 | -0.123162 | 0.000002  |
| C | -2.852799 | -0.973850 | -0.000047 |
| C | -2.318186 | 1.179674  | 0.000193  |
| N | -3.638326 | 1.128046  | 0.000177  |
| N | -3.942106 | -0.187033 | 0.000032  |
| C | -5.327366 | -0.584548 | -0.000153 |
| H | -5.826637 | -0.194085 | -0.889856 |
| H | -5.384009 | -1.673531 | 0.000420  |
| H | -5.827056 | -0.193127 | 0.888886  |
| H | -2.907975 | -2.052243 | -0.000173 |
| H | -1.797298 | 2.125883  | 0.000316  |
| H | 5.509606  | -1.015902 | 0.000045  |

24

4pzHF1B-cis-m ; E = -704.489806906 Hartree

|   |           |           |           |
|---|-----------|-----------|-----------|
| C | -2.016656 | -0.145788 | -1.431857 |
| C | -2.758468 | 1.016276  | -1.237756 |
| C | -1.416383 | -0.788732 | -0.350806 |
| H | -3.208505 | 1.515551  | -2.089880 |
| C | -2.933762 | 1.527039  | 0.045620  |
| C | -1.619769 | -0.269675 | 0.928800  |
| F | -1.045932 | -0.884794 | 1.969458  |
| C | -2.366842 | 0.875755  | 1.139564  |
| H | -2.490566 | 1.242308  | 2.153088  |
| H | -1.878914 | -0.565949 | -2.423304 |
| N | -0.717230 | -2.014632 | -0.537241 |
| N | 0.529037  | -2.059444 | -0.455420 |
| C | 1.343296  | -0.946565 | -0.247414 |
| C | 1.178400  | 0.444949  | -0.269485 |
| C | 2.730210  | -1.119425 | -0.016711 |
| N | 3.359871  | 0.034088  | 0.106817  |
| N | 2.397766  | 0.964001  | -0.059049 |
| C | 2.758950  | 2.359494  | 0.000819  |
| H | 3.491098  | 2.585639  | -0.777398 |
| H | 1.864265  | 2.964045  | -0.150050 |
| H | 3.193859  | 2.585895  | 0.976622  |
| H | 0.321591  | 1.078668  | -0.432969 |
| H | 3.260592  | -2.057923 | 0.066299  |
| H | -3.519995 | 2.426867  | 0.202078  |

24

4pzHF1B-cis-n ; E = -704.490084127 Hartree

|   |           |           |           |
|---|-----------|-----------|-----------|
| C | -2.381598 | -0.564910 | -1.217352 |
| C | -3.227753 | 0.539390  | -1.235232 |
| C | -1.546925 | -0.799471 | -0.125629 |
| H | -3.856114 | 0.721659  | -2.101073 |
| C | -3.278000 | 1.398080  | -0.140364 |
| C | -1.627122 | 0.065042  | 0.967896  |
| F | -0.839103 | -0.161465 | 2.026738  |
| C | -2.478175 | 1.155462  | 0.974067  |
| H | -2.497090 | 1.800870  | 1.845700  |
| H | -2.341253 | -1.256450 | -2.053134 |
| N | -0.756507 | -1.982074 | -0.077375 |
| N | 0.491532  | -1.931806 | -0.050525 |
| C | 1.229341  | -0.753088 | -0.173055 |
| C | 2.595736  | -0.783741 | 0.085706  |
| C | 0.996089  | 0.583110  | -0.616683 |
| N | 2.114958  | 1.285963  | -0.614455 |
| N | 3.069868  | 0.441281  | -0.174623 |
| C | 4.415758  | 0.931364  | -0.008924 |
| H | 4.460391  | 1.644636  | 0.817995  |
| H | 5.077234  | 0.090005  | 0.199744  |
| H | 4.733790  | 1.428664  | -0.926835 |
| H | 3.214332  | -1.596872 | 0.435481  |
| H | 0.081634  | 1.044866  | -0.956629 |
| H | -3.944060 | 2.254839  | -0.145625 |

24

4pzHF1B-trans-m ; E = -704.503169403 Hartree

|   |           |          |           |
|---|-----------|----------|-----------|
| C | -2.401749 | 1.575520 | 0.000529  |
| C | -3.787166 | 1.627979 | 0.000763  |
| C | -1.704932 | 0.359420 | -0.000040 |
| H | -4.296240 | 2.586141 | 0.001308  |

|   |           |           |           |
|---|-----------|-----------|-----------|
| C | -4.516689 | 0.441479  | 0.000268  |
| C | -2.469446 | -0.821925 | -0.000555 |
| F | -1.887631 | -2.019287 | -0.001357 |
| C | -3.854980 | -0.782255 | -0.000433 |
| H | -4.394563 | -1.723396 | -0.000888 |
| H | -1.799228 | 2.478319  | 0.000832  |
| N | -0.307050 | 0.492331  | -0.000261 |
| N | 0.351845  | -0.582170 | 0.000631  |
| C | 1.722255  | -0.387772 | 0.000497  |
| C | 2.484655  | 0.778832  | -0.000575 |
| C | 2.677074  | -1.430102 | 0.001499  |
| N | 3.913257  | -0.957455 | 0.001031  |
| N | 3.767445  | 0.383333  | -0.000202 |
| C | 4.948152  | 1.211038  | -0.001099 |
| H | 5.546643  | 1.001827  | -0.890549 |
| H | 4.647151  | 2.258981  | -0.001410 |
| H | 5.547378  | 1.002559  | 0.888019  |
| H | 2.187188  | 1.815766  | -0.001523 |
| H | 2.490845  | -2.495052 | 0.002492  |
| H | -5.602016 | 0.462864  | 0.000400  |

24

4pzHF1B-trans-n ; E = -704.503728670 Hartree

|   |           |           |           |
|---|-----------|-----------|-----------|
| C | 2.633390  | 1.465419  | -0.000554 |
| C | 4.013659  | 1.335107  | -0.000983 |
| C | 1.782848  | 0.351379  | 0.000086  |
| H | 4.644197  | 2.218084  | -0.001591 |
| C | 4.581021  | 0.063102  | -0.000594 |
| C | 2.385600  | -0.920123 | 0.000525  |
| F | 1.651097  | -2.031442 | 0.001462  |
| C | 3.764349  | -1.063178 | 0.000218  |
| H | 4.175641  | -2.067057 | 0.000627  |
| H | 2.154303  | 2.439315  | -0.000740 |
| N | 0.414873  | 0.668198  | 0.000459  |
| N | -0.379721 | -0.310072 | -0.000765 |
| C | -1.710702 | 0.069179  | -0.000172 |
| C | -2.760602 | -0.840038 | -0.001291 |
| C | -2.344972 | 1.338865  | 0.001483  |
| N | -3.660624 | 1.215430  | 0.001362  |
| N | -3.891430 | -0.114282 | -0.000275 |
| C | -5.252527 | -0.587835 | -0.000887 |
| H | -5.772788 | -0.224737 | -0.890172 |
| H | -5.248468 | -1.678255 | -0.001576 |
| H | -5.773108 | -0.225857 | 0.888658  |
| H | -2.754181 | -1.919832 | -0.002629 |
| H | -1.879337 | 2.313253  | 0.002702  |
| H | 5.659794  | -0.058106 | -0.000893 |

24

4pzHF2-cis-m ; E = -803.630444827 Hartree

|   |           |           |           |
|---|-----------|-----------|-----------|
| C | -2.070201 | -0.356790 | -0.951910 |
| C | -2.815924 | 0.809126  | -1.038839 |
| C | -1.301632 | -0.668086 | 0.168066  |
| H | -3.380567 | 1.007470  | -1.942724 |
| C | -2.826116 | 1.682335  | 0.044510  |
| C | -1.351065 | 0.227320  | 1.237947  |
| F | -0.626558 | -0.054127 | 2.325034  |
| C | -2.093589 | 1.395096  | 1.193927  |
| H | -2.090768 | 2.054825  | 2.054188  |
| F | -2.047648 | -1.203006 | -1.984252 |

|   |           |           |           |
|---|-----------|-----------|-----------|
| N | -0.656884 | -1.933337 | 0.275398  |
| N | 0.588678  | -2.024422 | 0.272440  |
| C | 1.459694  | -0.956898 | 0.074229  |
| C | 1.344380  | 0.375940  | -0.342852 |
| C | 2.855664  | -1.144931 | 0.225126  |
| N | 3.535905  | -0.048893 | -0.053424 |
| N | 2.596518  | 0.853310  | -0.402161 |
| C | 3.013665  | 2.178922  | -0.790418 |
| H | 3.666530  | 2.119477  | -1.663874 |
| H | 2.131393  | 2.772356  | -1.031386 |
| H | 3.558332  | 2.648464  | 0.031351  |
| H | 0.499454  | 0.990494  | -0.608280 |
| H | 3.356843  | -2.051578 | 0.534529  |
| H | -3.412158 | 2.593879  | -0.005325 |

24

4pzHF2-cis-n ; E = -803.631039952 Hartree

|   |           |           |           |
|---|-----------|-----------|-----------|
| C | 2.331504  | -0.799197 | 0.514605  |
| C | 3.179329  | 0.121998  | 1.108907  |
| C | 1.394749  | -0.437295 | -0.452698 |
| H | 3.870598  | -0.214079 | 1.873210  |
| C | 3.122369  | 1.449908  | 0.697042  |
| C | 1.382114  | 0.902267  | -0.847369 |
| F | 0.505825  | 1.272365  | -1.787050 |
| C | 2.223379  | 1.848770  | -0.288634 |
| H | 2.162748  | 2.875547  | -0.630820 |
| F | 2.374989  | -2.077615 | 0.897386  |
| N | 0.657525  | -1.440314 | -1.141921 |
| N | -0.590341 | -1.472935 | -1.109365 |
| C | -1.379976 | -0.641241 | -0.317686 |
| C | -2.759338 | -0.652206 | -0.500662 |
| C | -1.189835 | 0.240768  | 0.788088  |
| N | -2.344181 | 0.716533  | 1.219080  |
| N | -3.281349 | 0.170055  | 0.417413  |
| C | -4.664077 | 0.531637  | 0.609996  |
| H | -4.817202 | 1.584045  | 0.358852  |
| H | -5.286673 | -0.090997 | -0.033046 |
| H | -4.938601 | 0.369841  | 1.653882  |
| H | -3.355193 | -1.190330 | -1.222805 |
| H | -0.280111 | 0.525911  | 1.293553  |
| H | 3.784211  | 2.181478  | 1.148165  |

24

4pzHF2-trans-m ; E = -803.643917587 Hartree

|   |           |           |           |
|---|-----------|-----------|-----------|
| C | -2.345366 | 1.279608  | 0.000231  |
| C | -3.728974 | 1.287039  | 0.000384  |
| C | -1.578415 | 0.100515  | -0.000112 |
| H | -4.251147 | 2.236591  | 0.000717  |
| C | -4.401508 | 0.070181  | 0.000113  |
| C | -2.308718 | -1.104621 | -0.000400 |
| F | -1.673135 | -2.271876 | -0.000886 |
| C | -3.694201 | -1.127369 | -0.000315 |
| H | -4.194425 | -2.089169 | -0.000575 |
| F | -1.703137 | 2.447695  | 0.000524  |
| N | -0.192508 | 0.288123  | -0.000398 |
| N | 0.505681  | -0.762614 | 0.000382  |
| C | 1.865694  | -0.510906 | 0.000337  |
| C | 2.574455  | 0.689543  | -0.000421 |
| C | 2.866408  | -1.509382 | 0.001245  |
| N | 4.079611  | -0.981092 | 0.000858  |

|   |           |           |           |
|---|-----------|-----------|-----------|
| N | 3.873057  | 0.352261  | -0.000173 |
| C | 5.015260  | 1.232588  | -0.000943 |
| H | 5.622387  | 1.050462  | -0.890455 |
| H | 4.666949  | 2.265711  | -0.001099 |
| H | 5.623085  | 1.050966  | 0.888187  |
| H | 2.228183  | 1.711414  | -0.001186 |
| H | 2.729094  | -2.581817 | 0.002060  |
| H | -5.486386 | 0.053547  | 0.000218  |

24

4pzHF2-trans-n ; E = -803.644114247 Hartree

|   |           |           |           |
|---|-----------|-----------|-----------|
| C | 2.553349  | 1.148672  | -0.000091 |
| C | 3.924827  | 0.963566  | -0.000388 |
| C | 1.630439  | 0.086976  | 0.000173  |
| H | 4.573531  | 1.831592  | -0.000640 |
| C | 4.422115  | -0.334607 | -0.000372 |
| C | 2.186831  | -1.207480 | 0.000199  |
| F | 1.395517  | -2.276170 | 0.000524  |
| C | 3.555589  | -1.422591 | -0.000051 |
| H | 3.917588  | -2.444488 | -0.000008 |
| F | 2.080107  | 2.393547  | -0.000168 |
| N | 0.283833  | 0.465590  | 0.000567  |
| N | -0.552284 | -0.479017 | 0.000073  |
| C | -1.863207 | -0.038675 | 0.000042  |
| C | -2.955763 | -0.896599 | -0.000682 |
| C | -2.435195 | 1.260778  | 0.000356  |
| N | -3.754830 | 1.200512  | 0.000482  |
| N | -4.049801 | -0.117143 | -0.000148 |
| C | -5.432438 | -0.523710 | -0.000368 |
| H | -5.934259 | -0.136035 | -0.889855 |
| H | -5.481751 | -1.613020 | -0.000308 |
| H | -5.934525 | -0.135918 | 0.888911  |
| H | -3.001916 | -1.975290 | -0.001235 |
| H | -1.921226 | 2.210698  | 0.000807  |
| H | 5.494239  | -0.501502 | -0.000601 |

28

4pzHOMe1A-cis-m ; E = -719.750479204 Hartree

|   |           |           |           |
|---|-----------|-----------|-----------|
| C | 1.605746  | -0.493443 | 0.336936  |
| C | 2.331574  | 0.434324  | 1.080237  |
| C | 1.287391  | -0.206485 | -1.004489 |
| H | 2.578414  | 0.233537  | 2.116536  |
| C | 2.741051  | 1.633839  | 0.494087  |
| C | 1.733310  | 0.972754  | -1.585435 |
| C | 2.447538  | 1.906623  | -0.835084 |
| H | 2.777399  | 2.833235  | -1.293576 |
| N | 0.600106  | -1.170208 | -1.798330 |
| N | -0.632672 | -1.333331 | -1.677334 |
| C | -1.441852 | -0.579717 | -0.823952 |
| C | -1.297941 | 0.588386  | -0.064671 |
| C | -2.797977 | -0.940890 | -0.634991 |
| N | -3.429695 | -0.100916 | 0.164879  |
| N | -2.499531 | 0.819439  | 0.489079  |
| C | -2.874365 | 1.920720  | 1.341476  |
| H | -3.268867 | 1.537218  | 2.284745  |
| H | -1.993997 | 2.534188  | 1.535277  |
| H | -3.642606 | 2.525762  | 0.854274  |
| H | -0.467800 | 1.256622  | 0.099721  |
| H | -3.305433 | -1.795301 | -1.061146 |
| H | 3.303789  | 2.347729  | 1.087845  |



|   |          |           |           |
|---|----------|-----------|-----------|
| H | 1.495230 | 1.154252  | -2.629129 |
| O | 1.136669 | -1.670789 | 0.809425  |
| C | 1.398098 | -1.986591 | 2.155869  |
| H | 2.475359 | -2.054885 | 2.353627  |
| H | 0.953819 | -1.248716 | 2.836569  |
| H | 0.938450 | -2.959329 | 2.331902  |

28

4pzHOMe1A-cis-n ; E = -719.750440189 Hartree

|   |           |           |           |
|---|-----------|-----------|-----------|
| C | 1.634812  | -0.642014 | -0.229605 |
| C | 2.499666  | -0.888486 | 0.833860  |
| C | 1.459782  | 0.678647  | -0.686302 |
| H | 2.636954  | -1.897445 | 1.205411  |
| C | 3.187680  | 0.166173  | 1.435564  |
| C | 2.183365  | 1.711685  | -0.104777 |
| C | 3.033939  | 1.465370  | 0.971213  |
| H | 3.576000  | 2.283930  | 1.433363  |
| N | 0.654760  | 0.955024  | -1.829314 |
| N | -0.589714 | 0.859580  | -1.789964 |
| C | -1.316588 | 0.559310  | -0.634122 |
| C | -2.680067 | 0.312685  | -0.750066 |
| C | -1.077293 | 0.492893  | 0.771289  |
| N | -2.190933 | 0.223726  | 1.431195  |
| N | -3.148884 | 0.109982  | 0.488827  |
| C | -4.492679 | -0.220334 | 0.891967  |
| H | -4.824544 | 0.480485  | 1.660329  |
| H | -5.150819 | -0.150447 | 0.025335  |
| H | -4.528737 | -1.235263 | 1.296032  |
| H | -3.301390 | 0.273431  | -1.632450 |
| H | -0.161209 | 0.648801  | 1.320080  |
| H | 3.852889  | -0.042642 | 2.267786  |
| H | 2.052528  | 2.714541  | -0.499781 |
| O | 0.907074  | -1.586684 | -0.870219 |
| C | 0.988669  | -2.908449 | -0.393799 |
| H | 2.007257  | -3.307960 | -0.479202 |
| H | 0.659974  | -2.979775 | 0.650932  |
| H | 0.320197  | -3.497239 | -1.022613 |

28

4pzHOMe1A-trans-m ; E = -719.765917403 Hartree

|   |           |           |           |
|---|-----------|-----------|-----------|
| C | 2.417427  | 0.585195  | 0.000100  |
| C | 3.780820  | 0.277760  | 0.000098  |
| C | 1.469511  | -0.463274 | 0.000064  |
| H | 4.521534  | 1.068359  | 0.000196  |
| C | 4.197040  | -1.049353 | 0.000024  |
| C | 1.914935  | -1.788408 | 0.000000  |
| C | 3.267967  | -2.087514 | -0.000032 |
| H | 3.599799  | -3.120865 | -0.000093 |
| N | 0.116032  | -0.084966 | 0.000094  |
| N | -0.691554 | -1.051828 | -0.000028 |
| C | -2.021023 | -0.663665 | 0.000007  |
| C | -2.599249 | 0.603396  | 0.000225  |
| C | -3.121131 | -1.550468 | -0.000229 |
| N | -4.273375 | -0.897582 | -0.000166 |
| N | -3.927981 | 0.405222  | 0.000123  |
| C | -4.969701 | 1.401718  | 0.000014  |
| H | -5.594892 | 1.285418  | 0.888204  |
| H | -4.513083 | 2.391832  | 0.002205  |
| H | -5.592373 | 1.288197  | -0.890329 |
| H | -2.145060 | 1.582041  | 0.000358  |

|   |           |           |           |
|---|-----------|-----------|-----------|
| H | -3.099204 | -2.631507 | -0.000350 |
| H | 5.260685  | -1.269149 | 0.000032  |
| H | 1.159062  | -2.566408 | -0.000028 |
| O | 1.930485  | 1.843948  | 0.000181  |
| C | 2.855320  | 2.905390  | -0.000336 |
| H | 3.492124  | 2.890089  | 0.893459  |
| H | 3.492064  | 2.889262  | -0.894153 |
| H | 2.262112  | 3.820543  | -0.000730 |

28

4pzHOMe1A-trans-n ; E = -719.765974238 Hartree

|   |           |           |           |
|---|-----------|-----------|-----------|
| C | 2.545172  | 0.460967  | 0.000297  |
| C | 3.857314  | -0.020944 | 0.000524  |
| C | 1.469288  | -0.456102 | -0.000539 |
| H | 4.694042  | 0.667218  | 0.001248  |
| C | 4.097956  | -1.390721 | -0.000183 |
| C | 1.739436  | -1.827668 | -0.001277 |
| C | 3.042239  | -2.299892 | -0.001102 |
| H | 3.237563  | -3.367532 | -0.001801 |
| N | 0.176840  | 0.095805  | -0.001198 |
| N | -0.749835 | -0.757465 | 0.001320  |
| C | -2.014769 | -0.193898 | 0.000195  |
| C | -3.188442 | -0.935285 | 0.002529  |
| C | -2.451675 | 1.156104  | -0.003249 |
| N | -3.771483 | 1.231861  | -0.002980 |
| N | -4.199121 | -0.047430 | 0.000471  |
| C | -5.615220 | -0.312279 | 0.001516  |
| H | -6.076826 | 0.120681  | -0.889045 |
| H | -5.774292 | -1.391139 | 0.004859  |
| H | -6.076465 | 0.126140  | 0.889583  |
| H | -3.346910 | -2.003378 | 0.005434  |
| H | -1.840903 | 2.046859  | -0.005757 |
| H | 5.124169  | -1.746528 | -0.000069 |
| H | 0.889183  | -2.501273 | -0.002075 |
| O | 2.225152  | 1.770843  | 0.001044  |
| C | 3.277803  | 2.705803  | 0.001483  |
| H | 3.906996  | 2.608607  | 0.895510  |
| H | 3.907363  | 2.609038  | -0.892330 |
| H | 2.805451  | 3.688662  | 0.001630  |

28

4pzHOMe1B-cis-m ; E = -719.750479207 Hartree

|   |           |           |           |
|---|-----------|-----------|-----------|
| C | 1.733134  | -0.973101 | -1.585299 |
| C | 2.447375  | -1.906856 | -0.834835 |
| C | 1.287333  | 0.206281  | -1.004535 |
| H | 2.777130  | -2.833588 | -1.293160 |
| C | 2.741003  | -1.633851 | 0.494275  |
| C | 1.605798  | 0.493445  | 0.336810  |
| C | 2.331651  | -0.434207 | 1.080235  |
| H | 2.578631  | -0.233214 | 2.116460  |
| N | 0.600111  | 1.169932  | -1.798470 |
| N | -0.632658 | 1.333130  | -1.677445 |
| C | -1.441825 | 0.579677  | -0.823918 |
| C | -1.297968 | -0.588349 | -0.064484 |
| C | -2.797927 | 0.940949  | -0.634981 |
| N | -3.429699 | 0.101094  | 0.164977  |
| N | -2.499570 | -0.819269 | 0.489265  |
| C | -2.874501 | -1.920601 | 1.341565  |
| H | -3.642427 | -2.525806 | 0.854070  |
| H | -1.994088 | -2.533889 | 1.535748  |

|   |           |           |           |
|---|-----------|-----------|-----------|
| H | -3.269456 | -1.537104 | 2.284642  |
| H | -0.467815 | -1.256504 | 0.100126  |
| H | -3.305363 | 1.795324  | -1.061208 |
| H | 3.303773  | -2.347661 | 1.088098  |
| O | 1.136757  | 1.670888  | 0.809135  |
| C | 1.398377  | 1.986913  | 2.155488  |
| H | 0.954280  | 1.249103  | 2.836380  |
| H | 2.475662  | 2.055346  | 2.353060  |
| H | 0.938655  | 2.959631  | 2.331444  |
| H | 1.494982  | -1.154755 | -2.628945 |

28

4pzHOMe1B-cis-n ; E = -719.750440194 Hartree

|   |           |           |           |
|---|-----------|-----------|-----------|
| C | 2.183500  | -1.711868 | -0.104102 |
| C | 3.034350  | -1.465087 | 0.971563  |
| C | 1.459795  | -0.679081 | -0.685925 |
| H | 3.576450  | -2.283473 | 1.433979  |
| C | 3.188282  | -0.165687 | 1.435268  |
| C | 1.635001  | 0.641785  | -0.229845 |
| C | 2.500157  | 0.888729  | 0.833255  |
| H | 2.637636  | 1.897870  | 1.204245  |
| N | 0.654609  | -0.955896 | -1.828711 |
| N | -0.589855 | -0.860285 | -1.789373 |
| C | -1.316743 | -0.559367 | -0.633748 |
| C | -2.680346 | -0.313479 | -0.749882 |
| C | -1.077483 | -0.491507 | 0.771622  |
| N | -2.191224 | -0.222237 | 1.431285  |
| N | -3.149259 | -0.109860 | 0.488806  |
| C | -4.493164 | 0.220346  | 0.891672  |
| H | -4.529809 | 1.235987  | 1.293902  |
| H | -5.151479 | 0.148437  | 0.025339  |
| H | -4.824337 | -0.479305 | 1.661389  |
| H | -3.301703 | -0.275356 | -1.632326 |
| H | -0.161326 | -0.646423 | 1.320580  |
| H | 3.853757  | 0.043495  | 2.267184  |
| O | 0.907115  | 1.586203  | -0.870686 |
| C | 0.988868  | 2.908167  | -0.394840 |
| H | 0.660570  | 2.979923  | 0.649986  |
| H | 2.007416  | 3.307660  | -0.480802 |
| H | 0.320134  | 3.496684  | -1.023632 |
| H | 2.052572  | -2.714878 | -0.498641 |

28

4pzHOMe1B-trans-m ; E = -719.761466839 Hartree

|   |           |           |           |
|---|-----------|-----------|-----------|
| C | 2.008300  | -1.974804 | -0.000590 |
| C | 3.375635  | -2.202784 | -0.001194 |
| C | 1.462714  | -0.685889 | 0.000006  |
| H | 3.765678  | -3.215048 | -0.001836 |
| C | 4.233519  | -1.109083 | -0.000859 |
| C | 2.350395  | 0.424877  | 0.000420  |
| C | 3.728022  | 0.187592  | 0.000057  |
| H | 4.419311  | 1.021722  | 0.000499  |
| N | 0.061068  | -0.685896 | 0.000608  |
| N | -0.521082 | 0.432196  | -0.001602 |
| C | -1.904002 | 0.323121  | -0.001074 |
| C | -2.738266 | -0.792068 | 0.001466  |
| C | -2.792100 | 1.422090  | -0.003676 |
| N | -4.056976 | 1.028990  | -0.002434 |
| N | -3.995612 | -0.317106 | 0.000473  |
| C | -5.224579 | -1.070411 | 0.002735  |

|   |           |           |           |
|---|-----------|-----------|-----------|
| H | -5.811654 | -0.826629 | -0.885684 |
| H | -4.988183 | -2.134864 | 0.002727  |
| H | -5.809038 | -0.826111 | 0.892770  |
| H | -2.506160 | -1.845536 | 0.003818  |
| H | -2.539840 | 2.473427  | -0.006075 |
| H | 5.309716  | -1.255398 | -0.001195 |
| O | 1.819495  | 1.660244  | 0.001515  |
| C | 2.696016  | 2.762982  | 0.002216  |
| H | 3.331431  | 2.776065  | 0.896802  |
| H | 3.332568  | 2.776197  | -0.891536 |
| H | 2.058268  | 3.647294  | 0.001899  |
| H | 1.296246  | -2.794101 | -0.000651 |

28

4pzHOMe1B-trans-n ; E = -719.761672894 Hartree

|   |           |           |           |
|---|-----------|-----------|-----------|
| C | -2.298287 | -1.872682 | 0.000155  |
| C | -3.684143 | -1.905411 | 0.000491  |
| C | -1.576460 | -0.673589 | -0.000029 |
| H | -4.212899 | -2.852632 | 0.000693  |
| C | -4.379212 | -0.701845 | 0.000533  |
| C | -2.298571 | 0.551046  | -0.000065 |
| C | -3.695813 | 0.510700  | 0.000231  |
| H | -4.262933 | 1.433734  | 0.000206  |
| N | -0.189052 | -0.873556 | -0.000339 |
| N | 0.546550  | 0.149925  | 0.000427  |
| C | 1.898070  | -0.162249 | 0.000100  |
| C | 2.902415  | 0.795711  | 0.000827  |
| C | 2.594193  | -1.398772 | -0.001132 |
| N | 3.903364  | -1.212554 | -0.001012 |
| N | 4.069293  | 0.125781  | 0.000234  |
| C | 5.404766  | 0.665722  | 0.000724  |
| H | 5.943544  | 0.331282  | -0.888989 |
| H | 5.346955  | 1.754746  | 0.001970  |
| H | 5.943690  | 0.329254  | 0.889581  |
| H | 2.844950  | 1.873923  | 0.001853  |
| H | 2.175332  | -2.394179 | -0.001982 |
| H | -5.465292 | -0.694860 | 0.000802  |
| O | -1.598958 | 1.700667  | -0.000481 |
| C | -2.313712 | 2.914055  | -0.000713 |
| H | -2.942078 | 3.015796  | -0.894659 |
| H | -2.941852 | 3.016212  | 0.893347  |
| H | -1.559867 | 3.701946  | -0.000965 |
| H | -1.708449 | -2.783838 | 0.000082  |

32

4pzHOMe2-cis-m ; E = -834.151747414 Hartree

|   |           |           |           |
|---|-----------|-----------|-----------|
| C | 1.482879  | -1.211640 | -0.073012 |
| C | 2.184128  | -1.213372 | 1.135860  |
| C | 1.118492  | 0.000143  | -0.670210 |
| H | 2.465182  | -2.143983 | 1.613550  |
| C | 2.523155  | 0.000547  | 1.724209  |
| C | 1.482280  | 1.212133  | -0.073070 |
| C | 2.183531  | 1.214268  | 1.135804  |
| H | 2.464111  | 2.145044  | 1.613450  |
| N | 0.486155  | -0.000059 | -1.950325 |
| N | -0.758288 | -0.000256 | -2.040137 |
| C | -1.625116 | -0.000311 | -0.944580 |
| C | -1.504879 | -0.000275 | 0.451176  |
| C | -3.024425 | -0.000482 | -1.162092 |
| N | -3.705601 | -0.000548 | -0.030541 |

|   |           |           |           |
|---|-----------|-----------|-----------|
| N | -2.760032 | -0.000417 | 0.930161  |
| C | -3.169658 | -0.000488 | 2.312677  |
| H | -3.768226 | -0.889887 | 2.522135  |
| H | -2.281398 | -0.000210 | 2.945159  |
| H | -3.768729 | 0.888590  | 2.522045  |
| H | -0.655155 | -0.000145 | 1.114375  |
| H | -3.529010 | -0.000550 | -2.118407 |
| H | 3.069416  | 0.000704  | 2.662475  |
| O | 1.073053  | 2.321610  | -0.731341 |
| C | 1.421278  | 3.571049  | -0.184720 |
| H | 0.977146  | 3.716161  | 0.808717  |
| H | 2.509482  | 3.692131  | -0.112335 |
| H | 1.021365  | 4.320441  | -0.868287 |
| O | 1.074221  | -2.321355 | -0.731241 |
| C | 1.423039  | -3.570596 | -0.184544 |
| H | 2.511304  | -3.691169 | -0.112201 |
| H | 0.979019  | -3.715845 | 0.808922  |
| H | 1.023440  | -4.320218 | -0.868041 |

32

4pzHOMe2-cis-n ; E = -834.151756590 Hartree

|   |           |           |           |
|---|-----------|-----------|-----------|
| C | 2.124501  | -0.736719 | 0.002965  |
| C | 2.904145  | -0.249226 | 1.055393  |
| C | 1.182238  | 0.091785  | -0.617475 |
| H | 3.621726  | -0.886942 | 1.556665  |
| C | 2.749081  | 1.072128  | 1.457304  |
| C | 1.051952  | 1.425903  | -0.207754 |
| C | 1.835290  | 1.918014  | 0.837691  |
| H | 1.737143  | 2.944438  | 1.169012  |
| N | 0.497250  | -0.385112 | -1.774117 |
| N | -0.727531 | -0.620177 | -1.753351 |
| C | -1.525257 | -0.531005 | -0.608177 |
| C | -2.897155 | -0.711895 | -0.741964 |
| C | -1.342131 | -0.351736 | 0.795824  |
| N | -2.496112 | -0.414818 | 1.438608  |
| N | -3.426719 | -0.628430 | 0.486417  |
| C | -4.813294 | -0.716809 | 0.868850  |
| H | -5.161865 | 0.244582  | 1.254642  |
| H | -5.405261 | -0.994342 | -0.003895 |
| H | -4.930349 | -1.475137 | 1.645527  |
| H | -3.485529 | -0.888637 | -1.630109 |
| H | -0.433048 | -0.195975 | 1.355589  |
| H | 3.354730  | 1.452921  | 2.273869  |
| O | 0.122355  | 2.146695  | -0.878295 |
| C | -0.093095 | 3.476008  | -0.469788 |
| H | -0.428237 | 3.527220  | 0.573989  |
| H | 0.810004  | 4.088047  | -0.588510 |
| H | -0.877510 | 3.866683  | -1.118743 |
| O | 2.172052  | -2.004512 | -0.467975 |
| C | 3.124979  | -2.873920 | 0.095278  |
| H | 4.146227  | -2.492839 | -0.031556 |
| H | 2.935907  | -3.044837 | 1.163009  |
| H | 3.025060  | -3.818064 | -0.441111 |

32

4pzHOMe2-trans-m ; E = -834.161134033 Hartree

|   |           |           |           |
|---|-----------|-----------|-----------|
| C | -2.060221 | -1.267658 | -0.049874 |
| C | -3.454425 | -1.240424 | -0.031859 |
| C | -1.305850 | -0.070441 | -0.025938 |
| H | -4.030295 | -2.156136 | -0.069322 |

|   |           |           |           |
|---|-----------|-----------|-----------|
| C | -4.104108 | -0.014558 | 0.032692  |
| C | -1.999430 | 1.162747  | 0.046498  |
| C | -3.397272 | 1.178594  | 0.080427  |
| H | -3.934018 | 2.116897  | 0.138804  |
| N | 0.079315  | -0.247891 | 0.036230  |
| N | 0.789319  | 0.701284  | -0.391746 |
| C | 2.149518  | 0.460330  | -0.249809 |
| C | 2.833368  | -0.628193 | 0.284292  |
| C | 3.169831  | 1.346654  | -0.660048 |
| N | 4.374480  | 0.856651  | -0.406067 |
| N | 4.141363  | -0.340989 | 0.165834  |
| C | 5.263274  | -1.149769 | 0.571006  |
| H | 5.865676  | -0.609766 | 1.305209  |
| H | 4.892012  | -2.074548 | 1.013675  |
| H | 5.885925  | -1.384170 | -0.295579 |
| H | 2.464333  | -1.544897 | 0.717241  |
| H | 3.054552  | 2.314906  | -1.127179 |
| H | -5.189642 | 0.011582  | 0.046542  |
| O | -1.254880 | 2.281787  | 0.123587  |
| C | -1.914033 | 3.504381  | 0.353871  |
| H | -2.568875 | 3.775814  | -0.483721 |
| H | -2.504243 | 3.481337  | 1.278819  |
| H | -1.126204 | 4.252625  | 0.446374  |
| O | -1.338245 | -2.407287 | -0.114452 |
| C | -2.038314 | -3.628138 | -0.109075 |
| H | -2.644536 | -3.746184 | 0.798195  |
| H | -2.687058 | -3.728321 | -0.988671 |
| H | -1.278002 | -4.409672 | -0.136328 |

32

4pzHOMe2-trans-n ; E = -834.161208341 Hartree

|   |           |           |           |
|---|-----------|-----------|-----------|
| C | -2.277943 | -1.099185 | -0.056882 |
| C | -3.651031 | -0.860785 | -0.112917 |
| C | -1.352673 | -0.029401 | -0.012936 |
| H | -4.356694 | -1.679871 | -0.165435 |
| C | -4.108694 | 0.450369  | -0.102858 |
| C | -1.852484 | 1.295379  | 0.002240  |
| C | -3.231397 | 1.523730  | -0.037666 |
| H | -3.621319 | 2.533534  | -0.022751 |
| N | -0.015377 | -0.411643 | 0.131434  |
| N | 0.849089  | 0.398966  | -0.296331 |
| C | 2.147128  | -0.038540 | -0.069607 |
| C | 3.273774  | 0.669060  | -0.462704 |
| C | 2.664040  | -1.204092 | 0.552204  |
| N | 3.986619  | -1.208379 | 0.539509  |
| N | 4.336795  | -0.063223 | -0.080689 |
| C | 5.733850  | 0.238402  | -0.258102 |
| H | 6.213352  | -0.544450 | -0.850626 |
| H | 5.827412  | 1.193592  | -0.776058 |
| H | 6.229776  | 0.301853  | 0.713482  |
| H | 3.366946  | 1.615750  | -0.973524 |
| H | 2.107627  | -2.017302 | 0.994419  |
| H | -5.176894 | 0.640935  | -0.146484 |
| O | -0.950214 | 2.291411  | 0.101741  |
| C | -1.428245 | 3.601461  | 0.293393  |
| H | -1.993140 | 3.958947  | -0.576896 |
| H | -2.059879 | 3.678388  | 1.187545  |
| H | -0.542640 | 4.224740  | 0.422405  |
| O | -1.734413 | -2.334420 | -0.065510 |

|   |           |           |           |
|---|-----------|-----------|-----------|
| C | -2.608679 | -3.437427 | -0.062343 |
| H | -3.265545 | -3.433335 | 0.816832  |
| H | -3.224929 | -3.469702 | -0.970034 |
| H | -1.972807 | -4.322879 | -0.031120 |

36

4pzHPyrlA-cis-m ; E = -816.520560386 Hartree

|   |           |           |           |
|---|-----------|-----------|-----------|
| C | -0.532170 | -2.719224 | 1.025498  |
| C | -0.803629 | -3.513653 | -0.082511 |
| C | -0.670223 | -1.334894 | 0.978861  |
| H | -0.656942 | -4.587621 | -0.038724 |
| C | -1.260913 | -2.898877 | -1.243180 |
| C | -1.213674 | -0.703389 | -0.170299 |
| C | -1.475372 | -1.526181 | -1.283155 |
| H | -1.854204 | -1.081804 | -2.195966 |
| N | -0.277862 | -0.634056 | 2.160876  |
| N | 0.713497  | 0.133164  | 2.151481  |
| C | 1.547357  | 0.334585  | 1.049009  |
| C | 1.764424  | -0.295547 | -0.182402 |
| C | 2.540790  | 1.344338  | 1.090757  |
| N | 3.286809  | 1.354537  | 0.000937  |
| N | 2.800609  | 0.343815  | -0.748300 |
| C | 3.422540  | 0.051503  | -2.016025 |
| H | 4.457007  | -0.264775 | -1.862064 |
| H | 2.865399  | -0.746707 | -2.507365 |
| H | 3.413603  | 0.945065  | -2.643631 |
| H | 1.285366  | -1.130062 | -0.669275 |
| H | 2.710830  | 2.053144  | 1.889673  |
| H | -1.478635 | -3.491344 | -2.127238 |
| C | -2.552585 | 2.627035  | 0.367227  |
| C | -1.675492 | 1.509547  | 0.922158  |
| N | -1.430104 | 0.652447  | -0.237233 |
| C | -1.900767 | 1.271883  | -1.464762 |
| C | -2.081955 | 2.733934  | -1.080245 |
| H | -3.607187 | 2.329896  | 0.395608  |
| H | -2.151682 | 0.945009  | 1.729674  |
| H | -1.178930 | 1.128653  | -2.278215 |
| H | -1.119762 | 3.255743  | -1.127696 |
| H | -2.860608 | 0.837593  | -1.791623 |
| H | -2.785793 | 3.253291  | -1.735149 |
| H | -2.447427 | 3.556677  | 0.931889  |
| H | -0.735440 | 1.913088  | 1.321872  |
| H | -0.156233 | -3.151562 | 1.948306  |

36

4pzHPyrlA-cis-n ; E = -816.519600928 Hartree

|   |           |           |           |
|---|-----------|-----------|-----------|
| C | -2.200692 | -2.128670 | 0.736211  |
| C | -2.982623 | -2.405606 | -0.376884 |
| C | -1.432967 | -0.967873 | 0.816302  |
| H | -3.540833 | -3.333645 | -0.440152 |
| C | -3.025151 | -1.472225 | -1.408107 |
| C | -1.543400 | 0.032975  | -0.182888 |
| C | -2.332594 | -0.272722 | -1.308340 |
| H | -2.404568 | 0.443256  | -2.118414 |
| N | -0.624736 | -0.858637 | 1.986219  |
| N | 0.623124  | -0.757582 | 1.922134  |
| C | 1.368330  | -0.810335 | 0.739286  |
| C | 2.731110  | -0.535189 | 0.807511  |
| C | 1.166525  | -1.179400 | -0.624946 |
| N | 2.298108  | -1.125537 | -1.306398 |

|   |           |           |           |
|---|-----------|-----------|-----------|
| N | 3.233086  | -0.724042 | -0.420292 |
| C | 4.587455  | -0.528222 | -0.871586 |
| H | 4.639803  | 0.318070  | -1.561568 |
| H | 5.225295  | -0.333724 | -0.008698 |
| H | 4.932616  | -1.427287 | -1.385588 |
| H | 3.331561  | -0.230175 | 1.651875  |
| H | 0.262602  | -1.495755 | -1.121983 |
| H | -3.621659 | -1.663559 | -2.295403 |
| C | -0.571235 | 3.379999  | 0.816617  |
| C | -0.545782 | 1.894901  | 1.164665  |
| N | -0.880299 | 1.235684  | -0.096378 |
| C | -0.909759 | 2.182875  | -1.198454 |
| C | -0.153786 | 3.385399  | -0.651214 |
| H | -1.588700 | 3.775393  | 0.915277  |
| H | -1.259060 | 1.619429  | 1.948296  |
| H | -0.447173 | 1.752015  | -2.094182 |
| H | 0.925817  | 3.219976  | -0.739130 |
| H | -1.943160 | 2.468455  | -1.458027 |
| H | -0.402997 | 4.310442  | -1.176848 |
| H | 0.084596  | 3.969752  | 1.462075  |
| H | 0.450498  | 1.595913  | 1.517352  |
| H | -2.122194 | -2.833213 | 1.559090  |

36

4pzHPyr1A-trans-m ; E = -816.530527678 Hartree

|   |           |           |           |
|---|-----------|-----------|-----------|
| C | 1.340975  | -2.699847 | -0.368021 |
| C | 2.601855  | -3.210790 | -0.124639 |
| C | 1.031003  | -1.344775 | -0.177097 |
| H | 2.805115  | -4.269301 | -0.246090 |
| C | 3.594181  | -2.333264 | 0.313097  |
| C | 2.079964  | -0.421366 | 0.125455  |
| C | 3.343315  | -0.976598 | 0.429004  |
| H | 4.151759  | -0.322459 | 0.731835  |
| N | -0.347128 | -1.106021 | -0.245942 |
| N | -0.792869 | -0.156435 | 0.456744  |
| C | -2.174223 | -0.017515 | 0.373742  |
| C | -3.120822 | -0.715986 | -0.369243 |
| C | -2.929882 | 0.931467  | 1.097497  |
| N | -4.224475 | 0.831804  | 0.830804  |
| N | -4.313422 | -0.175433 | -0.057323 |
| C | -5.604192 | -0.515598 | -0.601244 |
| H | -5.934369 | 0.244311  | -1.315269 |
| H | -5.536545 | -1.481075 | -1.104057 |
| H | -6.328439 | -0.577128 | 0.212493  |
| H | -3.007438 | -1.531268 | -1.066513 |
| H | -2.567693 | 1.666192  | 1.803566  |
| H | 4.589351  | -2.704133 | 0.542112  |
| C | 1.611341  | 2.950098  | -1.094377 |
| C | 0.948308  | 1.618915  | -0.754517 |
| N | 1.928010  | 0.938167  | 0.083790  |
| C | 3.027186  | 1.825124  | 0.433793  |
| C | 2.476895  | 3.212268  | 0.134179  |
| H | 2.245922  | 2.845757  | -1.982133 |
| H | 0.714094  | 1.014636  | -1.638910 |
| H | 3.318069  | 1.692528  | 1.482155  |
| H | 1.856928  | 3.559303  | 0.968000  |
| H | 3.915266  | 1.623598  | -0.188278 |
| H | 3.268498  | 3.946799  | -0.032812 |
| H | 0.880363  | 3.738147  | -1.291754 |



|   |          |           |           |
|---|----------|-----------|-----------|
| H | 0.009662 | 1.759328  | -0.204735 |
| H | 0.513219 | -3.342608 | -0.651895 |

36

4pzHPyrlA-trans-n ; E = -816.530453350 Hartree

|   |           |           |           |
|---|-----------|-----------|-----------|
| C | -1.717715 | -2.621785 | 0.353916  |
| C | -3.009560 | -2.964589 | 0.000806  |
| C | -1.219484 | -1.319707 | 0.198862  |
| H | -3.358494 | -3.987055 | 0.097296  |
| C | -3.838729 | -1.966971 | -0.511697 |
| C | -2.109124 | -0.268926 | -0.184924 |
| C | -3.404322 | -0.654677 | -0.595840 |
| H | -4.092549 | 0.098407  | -0.959778 |
| N | 0.167436  | -1.261430 | 0.388658  |
| N | 0.791751  | -0.391678 | -0.280035 |
| C | 2.166521  | -0.436822 | -0.074220 |
| C | 3.071050  | 0.374875  | -0.743322 |
| C | 2.972760  | -1.226042 | 0.784837  |
| N | 4.254367  | -0.923901 | 0.652139  |
| N | 4.292818  | 0.050741  | -0.276714 |
| C | 5.569402  | 0.560495  | -0.707615 |
| H | 6.059403  | -0.140799 | -1.389684 |
| H | 5.422042  | 1.515015  | -1.215067 |
| H | 6.204073  | 0.707095  | 0.167438  |
| H | 2.915386  | 1.131284  | -1.498257 |
| H | 2.650015  | -1.981920 | 1.485325  |
| H | -4.851097 | -2.205613 | -0.825598 |
| C | -1.307113 | 3.011040  | 1.105001  |
| C | -0.796448 | 1.605466  | 0.803343  |
| N | -1.783075 | 1.059833  | -0.121595 |
| C | -2.728600 | 2.081612  | -0.544146 |
| C | -2.030685 | 3.385617  | -0.184729 |
| H | -2.019067 | 2.987988  | 1.938144  |
| H | -0.716667 | 0.974697  | 1.696533  |
| H | -2.951030 | 1.991070  | -1.613624 |
| H | -1.306836 | 3.651824  | -0.962869 |
| H | -3.681638 | 1.994554  | 0.004106  |
| H | -2.732203 | 4.215786  | -0.071650 |
| H | -0.499304 | 3.697728  | 1.370289  |
| H | 0.195274  | 1.622951  | 0.335111  |
| H | -1.008113 | -3.365478 | 0.703478  |

36

4pzHPyrlB-cis-m ; E = -816.518559927 Hartree

|   |           |           |           |
|---|-----------|-----------|-----------|
| C | 1.463717  | 0.854665  | -0.102699 |
| C | 1.789800  | 1.972823  | 0.691590  |
| C | 0.336586  | 0.976212  | -0.951054 |
| H | 2.641777  | 1.918982  | 1.359140  |
| C | 1.048466  | 3.145319  | 0.639970  |
| C | -0.394557 | 2.163208  | -0.993810 |
| C | -0.054228 | 3.252437  | -0.202854 |
| H | -0.626369 | 4.172505  | -0.260501 |
| N | 0.048089  | -0.017397 | -1.934008 |
| N | -1.027356 | -0.656262 | -1.920794 |
| C | -1.952819 | -0.612874 | -0.871867 |
| C | -2.002083 | -0.059528 | 0.414898  |
| C | -3.140479 | -1.381268 | -0.953153 |
| N | -3.855826 | -1.311786 | 0.154967  |
| N | -3.140130 | -0.509568 | 0.968314  |
| C | -3.648276 | -0.219383 | 2.286636  |

|   |           |           |           |
|---|-----------|-----------|-----------|
| H | -3.757860 | -1.146423 | 2.853812  |
| H | -2.948820 | 0.442633  | 2.797778  |
| H | -4.622768 | 0.267608  | 2.208669  |
| H | -1.339538 | 0.602728  | 0.947974  |
| H | -3.470718 | -1.974929 | -1.794484 |
| H | 1.342551  | 3.983269  | 1.265403  |
| C | 2.613629  | -2.561488 | 0.468046  |
| C | 1.699222  | -1.634629 | -0.332328 |
| N | 2.215845  | -0.294475 | -0.041104 |
| C | 3.421863  | -0.353676 | 0.764815  |
| C | 3.919417  | -1.775676 | 0.548309  |
| H | 2.210089  | -2.712184 | 1.475894  |
| H | 1.746578  | -1.849890 | -1.404253 |
| H | 4.142470  | 0.407707  | 0.444037  |
| H | 4.585174  | -2.112935 | 1.346658  |
| H | 0.651883  | -1.724291 | -0.020554 |
| H | 2.721167  | -3.542983 | -0.000156 |
| H | 4.461774  | -1.840347 | -0.401218 |
| H | 3.208945  | -0.180094 | 1.834538  |
| H | -1.232229 | 2.218208  | -1.683362 |

36

4pzHPyr1B-cis-n ; E = -816.518113843 Hartree

|   |           |           |           |
|---|-----------|-----------|-----------|
| C | 1.701090  | 0.760023  | -0.074592 |
| C | 2.226548  | 1.836344  | 0.667067  |
| C | 0.491210  | 0.987119  | -0.774591 |
| H | 3.150054  | 1.702550  | 1.217939  |
| C | 1.589229  | 3.068531  | 0.709903  |
| C | -0.136830 | 2.232076  | -0.717815 |
| C | 0.397716  | 3.277868  | 0.021119  |
| H | -0.096529 | 4.243434  | 0.041630  |
| N | 0.034997  | 0.042971  | -1.738530 |
| N | -1.119286 | -0.437298 | -1.707158 |
| C | -2.000254 | -0.285483 | -0.627065 |
| C | -3.286614 | -0.803686 | -0.737437 |
| C | -1.928653 | 0.156370  | 0.728789  |
| N | -3.064720 | -0.073045 | 1.365623  |
| N | -3.876618 | -0.648635 | 0.456424  |
| C | -5.227531 | -0.980477 | 0.833949  |
| H | -5.811116 | -0.070882 | 0.998332  |
| H | -5.685582 | -1.567176 | 0.036966  |
| H | -5.212191 | -1.564761 | 1.755722  |
| H | -3.776812 | -1.261107 | -1.584093 |
| H | -1.108482 | 0.621545  | 1.253137  |
| H | 2.033240  | 3.872125  | 1.290254  |
| C | 2.547231  | -2.748653 | 0.408505  |
| C | 1.656701  | -1.736015 | -0.310429 |
| N | 2.341571  | -0.456340 | -0.105588 |
| C | 3.618094  | -0.640866 | 0.561713  |
| C | 3.931280  | -2.111143 | 0.323737  |
| H | 2.245328  | -2.839259 | 1.458179  |
| H | 1.565108  | -1.966637 | -1.376269 |
| H | 4.376200  | 0.033643  | 0.146712  |
| H | 4.642949  | -2.510583 | 1.050622  |
| H | 0.644990  | -1.705577 | 0.111363  |
| H | 2.494318  | -3.742327 | -0.043391 |
| H | 4.352044  | -2.246225 | -0.678672 |
| H | 3.546062  | -0.434891 | 1.644064  |
| H | -1.046480 | 2.370520  | -1.295007 |

36

4pzHPyrlB-trans-m ; E = -816.536534834 Hartree

|   |           |           |           |
|---|-----------|-----------|-----------|
| C | -2.166021 | -0.360742 | -0.014315 |
| C | -3.444689 | -0.970205 | -0.050077 |
| C | -1.038664 | -1.233987 | 0.032704  |
| H | -4.329961 | -0.347770 | -0.084423 |
| C | -3.599087 | -2.341849 | -0.017213 |
| C | -1.230714 | -2.625017 | 0.077235  |
| C | -2.488004 | -3.188806 | 0.053123  |
| H | -2.612656 | -4.266302 | 0.083539  |
| N | 0.236190  | -0.662257 | 0.002785  |
| N | 1.200014  | -1.477726 | 0.016883  |
| C | 2.443385  | -0.866867 | -0.011301 |
| C | 2.809228  | 0.477164  | -0.015422 |
| C | 3.674634  | -1.560804 | -0.028938 |
| N | 4.706053  | -0.729242 | -0.044878 |
| N | 4.155443  | 0.498601  | -0.031430 |
| C | 5.017166  | 1.651686  | -0.100037 |
| H | 5.394801  | 1.793546  | -1.116938 |
| H | 4.457055  | 2.536566  | 0.205423  |
| H | 5.861148  | 1.502253  | 0.574785  |
| H | 2.212032  | 1.375599  | -0.003590 |
| H | 3.828205  | -2.631019 | -0.025402 |
| H | -4.602325 | -2.758442 | -0.038322 |
| C | -1.500969 | 3.201679  | 0.536560  |
| C | -0.915681 | 1.818194  | 0.270716  |
| N | -2.086119 | 1.004333  | -0.041222 |
| C | -3.269260 | 1.826314  | -0.252932 |
| C | -2.714970 | 3.238992  | -0.384593 |
| H | -1.820934 | 3.279137  | 1.581988  |
| H | -0.211925 | 1.830210  | -0.572285 |
| H | -3.814334 | 1.504206  | -1.148019 |
| H | -3.450072 | 4.001249  | -0.115003 |
| H | -0.372289 | 1.407234  | 1.125397  |
| H | -0.781413 | 4.001811  | 0.344115  |
| H | -2.399289 | 3.421229  | -1.417852 |
| H | -3.962345 | 1.755280  | 0.600985  |
| H | -0.334904 | -3.235265 | 0.117568  |

36

4pzHPyrlB-trans-n ; E = -816.537343706 Hartree

|   |           |           |           |
|---|-----------|-----------|-----------|
| C | -2.181474 | -0.511461 | -0.011215 |
| C | -3.362935 | -1.293960 | -0.043785 |
| C | -0.943342 | -1.219826 | 0.037650  |
| H | -4.326182 | -0.800817 | -0.079239 |
| C | -3.324868 | -2.673395 | -0.005820 |
| C | -0.940368 | -2.623856 | 0.087229  |
| C | -2.106715 | -3.357605 | 0.066491  |
| H | -2.080406 | -4.441884 | 0.100968  |
| N | 0.238960  | -0.476046 | 0.003899  |
| N | 1.307517  | -1.148554 | 0.020247  |
| C | 2.449104  | -0.363901 | -0.011838 |
| C | 3.736628  | -0.882087 | -0.032257 |
| C | 2.640680  | 1.042336  | -0.034337 |
| N | 3.926731  | 1.353065  | -0.067216 |
| N | 4.574221  | 0.172336  | -0.071415 |
| C | 6.014397  | 0.160642  | -0.041244 |
| H | 6.385484  | 0.390228  | 0.962125  |
| H | 6.371241  | -0.825497 | -0.341868 |

|   |           |           |           |
|---|-----------|-----------|-----------|
| H | 6.388184  | 0.911405  | -0.738880 |
| H | 4.083149  | -1.904687 | -0.026836 |
| H | 1.888401  | 1.817399  | -0.032851 |
| H | -4.260463 | -3.225560 | -0.024404 |
| C | -2.015644 | 3.110949  | 0.521474  |
| C | -1.244355 | 1.821148  | 0.261094  |
| N | -2.292307 | 0.850060  | -0.041970 |
| C | -3.578017 | 1.499318  | -0.256846 |
| C | -3.224566 | 2.974459  | -0.396951 |
| H | -2.341479 | 3.149052  | 1.567302  |
| H | -0.551982 | 1.925724  | -0.584075 |
| H | -4.073826 | 1.099599  | -1.149344 |
| H | -4.057994 | 3.628908  | -0.129986 |
| H | -0.646830 | 1.495129  | 1.115833  |
| H | -1.413502 | 4.001230  | 0.323104  |
| H | -2.938569 | 3.192905  | -1.431816 |
| H | -4.253907 | 1.337668  | 0.598524  |
| H | 0.031683  | -3.103378 | 0.128761  |

48

4pzHPyr2-cis-m ; E = -1027.68676191 Hartree

|   |           |           |           |
|---|-----------|-----------|-----------|
| C | -1.265612 | -0.936145 | 0.794309  |
| C | -1.245377 | -0.864406 | 2.197880  |
| C | -0.030751 | -0.920673 | 0.112287  |
| H | -2.175441 | -0.841736 | 2.752413  |
| C | -0.035835 | -0.824364 | 2.879305  |
| C | 1.196174  | -0.963407 | 0.803576  |
| C | 1.176255  | -0.903108 | 2.205535  |
| H | 2.105539  | -0.918246 | 2.762305  |
| N | -0.015824 | -0.802908 | -1.313132 |
| N | 0.030676  | 0.339139  | -1.826632 |
| C | 0.061319  | 1.529007  | -1.100803 |
| C | 0.041265  | 1.909744  | 0.248247  |
| C | 0.123287  | 2.761330  | -1.798366 |
| N | 0.141011  | 3.797722  | -0.980963 |
| N | 0.089579  | 3.250921  | 0.252185  |
| C | 0.090491  | 4.119770  | 1.402698  |
| H | -0.777962 | 4.781575  | 1.369213  |
| H | 0.051172  | 3.509047  | 2.305199  |
| H | 0.999278  | 4.725781  | 1.408969  |
| H | -0.003567 | 1.353283  | 1.171328  |
| H | 0.155247  | 2.895624  | -2.870937 |
| H | -0.039439 | -0.768707 | 3.964285  |
| C | 4.044099  | -1.619909 | -1.453147 |
| C | 2.629256  | -1.943547 | -0.954431 |
| N | 2.389266  | -0.947016 | 0.087678  |
| C | 3.646424  | -0.764077 | 0.782463  |
| C | 4.658291  | -0.718323 | -0.360564 |
| H | 4.620883  | -2.536594 | -1.601650 |
| H | 2.588845  | -2.959194 | -0.526019 |
| H | 3.627426  | 0.154207  | 1.377785  |
| H | 4.752055  | 0.308047  | -0.725210 |
| C | -4.027740 | -1.218664 | -1.579753 |
| C | -2.718101 | -1.776366 | -1.044544 |
| N | -2.457656 | -0.893927 | 0.086430  |
| C | -3.713115 | -0.695953 | 0.787423  |
| C | -4.791088 | -0.805958 | -0.309005 |
| H | -3.814426 | -0.342751 | -2.199501 |
| H | -2.838895 | -2.820892 | -0.706865 |

|   |           |           |           |
|---|-----------|-----------|-----------|
| H | -3.879116 | -1.468318 | 1.558218  |
| H | -5.326989 | 0.136393  | -0.446520 |
| H | -1.896840 | -1.745144 | -1.762995 |
| H | -4.575806 | -1.941138 | -2.189802 |
| H | -5.532259 | -1.561026 | -0.032310 |
| H | -3.709645 | 0.275301  | 1.294676  |
| H | 3.869826  | -1.605590 | 1.464979  |
| H | 5.649724  | -1.049640 | -0.041018 |
| H | 4.010835  | -1.097908 | -2.412616 |
| H | 1.864742  | -1.879604 | -1.731552 |

48

4pzHPyr2-cis-n ; E = -1027.68684943 Hartree

|   |           |           |           |
|---|-----------|-----------|-----------|
| C | -0.652704 | -1.427841 | 0.659667  |
| C | -0.539653 | -1.729926 | 2.021788  |
| C | 0.452815  | -0.858655 | -0.004859 |
| H | -1.382040 | -2.148005 | 2.559203  |
| C | 0.656095  | -1.479070 | 2.685137  |
| C | 1.698820  | -0.701791 | 0.636978  |
| C | 1.767207  | -0.993359 | 2.014167  |
| H | 2.694487  | -0.842264 | 2.552912  |
| N | 0.287251  | -0.406901 | -1.354402 |
| N | -0.278762 | 0.689635  | -1.565312 |
| C | -0.724724 | 1.554876  | -0.561923 |
| C | -1.422398 | 2.693108  | -0.954699 |
| C | -0.644540 | 1.679252  | 0.859670  |
| N | -1.240723 | 2.784622  | 1.272762  |
| N | -1.710669 | 3.381682  | 0.157094  |
| C | -2.444884 | 4.615130  | 0.279780  |
| H | -1.840231 | 5.350849  | 0.814173  |
| H | -2.678769 | 4.990253  | -0.717143 |
| H | -3.372371 | 4.448224  | 0.833224  |
| H | -1.711269 | 3.017310  | -1.943576 |
| H | -0.176571 | 1.029631  | 1.583666  |
| H | 0.732918  | -1.697857 | 3.746377  |
| C | 4.572893  | -0.321700 | -1.568930 |
| C | 3.052685  | -0.434158 | -1.450863 |
| N | 2.792524  | -0.191300 | -0.029204 |
| C | 4.013102  | 0.133306  | 0.685105  |
| C | 4.944681  | 0.610743  | -0.419337 |
| H | 5.036472  | -1.302461 | -1.412202 |
| H | 2.678625  | -1.416370 | -1.756722 |
| H | 3.824447  | 0.894816  | 1.450921  |
| H | 4.712866  | 1.649349  | -0.679955 |
| C | -3.356038 | -2.104704 | -1.721159 |
| C | -1.911774 | -2.315589 | -1.278415 |
| N | -1.857286 | -1.567528 | -0.028035 |
| C | -3.066764 | -1.899652 | 0.696538  |
| C | -4.142958 | -1.961624 | -0.399287 |
| H | -3.425261 | -1.183639 | -2.306520 |
| H | -1.705410 | -3.386073 | -1.099868 |
| H | -2.986526 | -2.879357 | 1.202360  |
| H | -4.748532 | -1.051814 | -0.403255 |
| H | -1.174814 | -1.941215 | -1.992042 |
| H | -3.718656 | -2.925514 | -2.345325 |
| H | -4.821233 | -2.802097 | -0.229316 |
| H | -3.268970 | -1.145739 | 1.463855  |
| H | 4.443362  | -0.748737 | 1.191546  |
| H | 5.998184  | 0.555646  | -0.133507 |

|   |          |          |           |
|---|----------|----------|-----------|
| H | 4.887518 | 0.044471 | -2.549551 |
| H | 2.544269 | 0.309040 | -2.075735 |

48

4pzHPyr2-trans-m ; E = -1027.69725120 Hartree

|   |           |           |           |
|---|-----------|-----------|-----------|
| C | 0.787205  | -2.106889 | 0.207035  |
| C | 1.908693  | -2.865438 | 0.598821  |
| C | 0.917315  | -0.675177 | 0.179464  |
| H | 1.826847  | -3.936889 | 0.717603  |
| C | 3.105461  | -2.244251 | 0.909021  |
| C | 2.219110  | -0.078016 | 0.319839  |
| C | 3.284793  | -0.879183 | 0.763863  |
| H | 4.258926  | -0.446383 | 0.947295  |
| N | -0.279068 | 0.013946  | 0.105944  |
| N | -0.331390 | 1.174700  | 0.614274  |
| C | -1.595604 | 1.745254  | 0.512236  |
| C | -2.745793 | 1.324616  | -0.149824 |
| C | -1.973268 | 2.965398  | 1.117175  |
| N | -3.238467 | 3.270899  | 0.861559  |
| N | -3.683643 | 2.264590  | 0.090948  |
| C | -5.045438 | 2.291408  | -0.378205 |
| H | -5.218546 | 3.190648  | -0.974287 |
| H | -5.226105 | 1.408494  | -0.992402 |
| H | -5.734279 | 2.290665  | 0.470089  |
| H | -2.933532 | 0.460902  | -0.768352 |
| H | -1.363131 | 3.613618  | 1.731178  |
| H | 3.941109  | -2.853158 | 1.243574  |
| C | 2.721734  | 2.914345  | -1.637992 |
| C | 1.699621  | 1.969048  | -1.016212 |
| N | 2.461816  | 1.225669  | -0.022316 |
| C | 3.782731  | 1.807536  | 0.164317  |
| C | 3.664219  | 3.186010  | -0.469909 |
| H | 3.265203  | 2.414168  | -2.448257 |
| H | 1.241784  | 1.283268  | -1.738703 |
| H | 4.049202  | 1.839901  | 1.226923  |
| H | 3.202121  | 3.887272  | 0.233585  |
| C | -2.609624 | -3.469322 | -0.314503 |
| C | -1.708530 | -2.237999 | -0.313616 |
| N | -0.375148 | -2.781317 | -0.074222 |
| C | -0.365946 | -4.233895 | -0.197675 |
| C | -1.698753 | -4.562215 | -0.856618 |
| H | -2.913651 | -3.708811 | 0.710921  |
| H | -1.750445 | -1.706121 | -1.274752 |
| H | 0.487056  | -4.566144 | -0.800268 |
| H | -2.038629 | -5.575475 | -0.627725 |
| H | -1.981607 | -1.512748 | 0.455399  |
| H | -3.516052 | -3.319104 | -0.907155 |
| H | -1.607534 | -4.472429 | -1.944967 |
| H | -0.282118 | -4.718466 | 0.788474  |
| H | 4.552842  | 1.213934  | -0.355548 |
| H | 4.634264  | 3.590603  | -0.769269 |
| H | 2.257541  | 3.815779  | -2.046084 |
| H | 0.882479  | 2.519713  | -0.533883 |

48

4pzHPyr2-trans-n ; E = -1027.69767461 Hartree

|   |           |           |          |
|---|-----------|-----------|----------|
| C | -2.309146 | 0.081621  | 0.272291 |
| C | -3.381079 | -0.688260 | 0.769410 |
| C | -1.014945 | -0.540424 | 0.190171 |
| H | -4.348056 | -0.232868 | 0.931953 |

|   |           |           |           |
|---|-----------|-----------|-----------|
| C | -3.192988 | -2.011601 | 1.124835  |
| C | -0.897241 | -1.961531 | 0.383172  |
| C | -1.986271 | -2.662103 | 0.927620  |
| H | -1.906576 | -3.717794 | 1.149270  |
| N | 0.039475  | 0.336414  | 0.013894  |
| N | 1.175663  | 0.000424  | 0.466271  |
| C | 2.136961  | 0.985288  | 0.264259  |
| C | 3.418330  | 0.930581  | 0.793770  |
| C | 2.117005  | 2.201387  | -0.466872 |
| N | 3.279353  | 2.833295  | -0.387188 |
| N | 4.054612  | 2.046329  | 0.379157  |
| C | 5.376466  | 2.492450  | 0.736298  |
| H | 5.345795  | 3.172180  | 1.593841  |
| H | 5.996045  | 1.628547  | 0.983315  |
| H | 5.806362  | 3.016835  | -0.117719 |
| H | 3.889195  | 0.189999  | 1.422970  |
| H | 1.310951  | 2.609275  | -1.058968 |
| H | -4.030124 | -2.567558 | 1.538597  |
| C | 1.591997  | -3.554282 | -1.689167 |
| C | 1.105666  | -2.242447 | -1.082793 |
| N | 0.218690  | -2.656540 | -0.003783 |
| C | 0.315177  | -4.089708 | 0.228966  |
| C | 1.601105  | -4.486530 | -0.481952 |
| H | 0.878649  | -3.919581 | -2.437272 |
| H | 0.570212  | -1.603976 | -1.795057 |
| H | 0.325440  | -4.312165 | 1.302159  |
| H | 2.466726  | -4.272965 | 0.154912  |
| C | -2.445839 | 3.709980  | -0.419206 |
| C | -1.603835 | 2.438078  | -0.408793 |
| N | -2.557848 | 1.390700  | -0.052427 |
| C | -3.929287 | 1.881965  | -0.113346 |
| C | -3.818730 | 3.211021  | -0.848401 |
| H | -2.498435 | 4.130157  | 0.591726  |
| H | -1.153986 | 2.242773  | -1.391924 |
| H | -4.573271 | 1.169043  | -0.640758 |
| H | -4.635523 | 3.893533  | -0.599969 |
| H | -0.781015 | 2.480409  | 0.306609  |
| H | -2.029533 | 4.475159  | -1.079492 |
| H | -3.836812 | 3.039706  | -1.930616 |
| H | -4.348733 | 2.021747  | 0.896057  |
| H | -0.543453 | -4.621228 | -0.213844 |
| H | 1.621585  | -5.547638 | -0.742688 |
| H | 2.567006  | -3.451443 | -2.172402 |
| H | 1.937864  | -1.649417 | -0.683753 |

30

4pzMe-cis-m ; E = -683.903377388 Hartree

|   |           |           |           |
|---|-----------|-----------|-----------|
| C | -2.809900 | -0.470705 | -0.926639 |
| C | -3.724585 | 0.389703  | -0.331275 |
| C | -1.671354 | -0.876998 | -0.227442 |
| H | -4.596557 | 0.718532  | -0.888861 |
| C | -3.535335 | 0.810719  | 0.982826  |
| C | -1.492301 | -0.475748 | 1.101229  |
| H | -0.628203 | -0.824482 | 1.656750  |
| C | -2.425978 | 0.361653  | 1.698581  |
| H | -2.287446 | 0.665353  | 2.732197  |
| H | -2.954561 | -0.834477 | -1.939410 |
| N | -0.831386 | -1.838067 | -0.856698 |
| N | 0.416798  | -1.774790 | -0.827334 |

|   |           |           |           |
|---|-----------|-----------|-----------|
| C | 1.141242  | -0.671497 | -0.360565 |
| C | 0.988719  | 0.706016  | -0.544756 |
| C | 2.397978  | -0.827715 | 0.282761  |
| N | 2.952076  | 0.350182  | 0.520989  |
| N | 2.094568  | 1.256724  | 0.003908  |
| C | 2.466206  | 2.649447  | 0.016027  |
| H | 2.719253  | 3.003533  | -0.988929 |
| H | 1.657665  | 3.263999  | 0.420231  |
| H | 3.342953  | 2.735857  | 0.656017  |
| C | -0.043753 | 1.510267  | -1.246766 |
| H | 0.385994  | 2.418021  | -1.679219 |
| H | -0.486803 | 0.927554  | -2.056169 |
| H | -0.859242 | 1.796535  | -0.572234 |
| C | 3.035079  | -2.103823 | 0.703373  |
| H | 2.577081  | -2.499816 | 1.616284  |
| H | 2.908325  | -2.860331 | -0.076100 |
| H | 4.098209  | -1.946944 | 0.894819  |
| H | -4.257168 | 1.470412  | 1.454447  |

30

4pzMe-cis-n ; E = -683.904412835 Hartree

|   |           |           |           |
|---|-----------|-----------|-----------|
| C | -2.967972 | 0.633401  | 0.779835  |
| C | -3.907787 | -0.276279 | 0.311824  |
| C | -1.793260 | 0.857625  | 0.058894  |
| H | -4.807546 | -0.466419 | 0.889403  |
| C | -3.706751 | -0.928252 | -0.903024 |
| C | -1.600247 | 0.223394  | -1.173088 |
| H | -0.703962 | 0.429877  | -1.748406 |
| C | -2.559168 | -0.662378 | -1.648389 |
| H | -2.408597 | -1.151118 | -2.606547 |
| H | -3.118017 | 1.171728  | 1.710544  |
| N | -0.918439 | 1.872618  | 0.527589  |
| N | 0.323115  | 1.734792  | 0.564909  |
| C | 1.006599  | 0.529145  | 0.364652  |
| C | 2.312662  | 0.572240  | -0.124086 |
| C | 0.790896  | -0.838685 | 0.729741  |
| N | 1.871635  | -1.553768 | 0.453154  |
| N | 2.764312  | -0.694920 | -0.084775 |
| C | 4.046239  | -1.186941 | -0.519218 |
| H | 4.179769  | -1.039711 | -1.595377 |
| H | 4.859574  | -0.684109 | 0.012573  |
| H | 4.071452  | -2.251861 | -0.292954 |
| C | 3.092906  | 1.732129  | -0.617941 |
| H | 3.175726  | 1.738751  | -1.711050 |
| H | 2.579533  | 2.645858  | -0.310575 |
| H | 4.107778  | 1.739525  | -0.207298 |
| C | -0.353406 | -1.492506 | 1.423000  |
| H | -0.718408 | -0.875793 | 2.248727  |
| H | -1.196660 | -1.662558 | 0.746984  |
| H | -0.021522 | -2.453846 | 1.820277  |
| H | -4.447749 | -1.628733 | -1.275634 |

30

4pzMe-trans-m ; E = -683.923838401 Hartree

|   |           |           |           |
|---|-----------|-----------|-----------|
| C | -3.022466 | -1.360107 | 0.000263  |
| C | -4.403766 | -1.204314 | 0.000210  |
| C | -2.187387 | -0.240737 | 0.000040  |
| H | -5.047736 | -2.078666 | 0.000386  |
| C | -4.957807 | 0.072396  | -0.000070 |
| C | -2.746015 | 1.044124  | -0.000243 |



|   |           |           |           |
|---|-----------|-----------|-----------|
| H | -2.079593 | 1.899629  | -0.000416 |
| C | -4.124068 | 1.192837  | -0.000295 |
| H | -4.558007 | 2.188763  | -0.000516 |
| H | -2.562439 | -2.343575 | 0.000482  |
| N | -0.801748 | -0.510983 | 0.000121  |
| N | -0.077809 | 0.520132  | -0.000011 |
| C | 1.285234  | 0.314287  | 0.000020  |
| C | 2.079003  | -0.841955 | -0.000042 |
| C | 2.204833  | 1.399839  | 0.000084  |
| N | 3.450883  | 0.959829  | 0.000075  |
| N | 3.348370  | -0.392462 | -0.000004 |
| C | 4.550224  | -1.186329 | -0.000135 |
| H | 5.389375  | -0.492509 | 0.000430  |
| H | 4.600633  | -1.820920 | 0.890006  |
| H | 4.601091  | -1.819994 | -0.890917 |
| C | 1.743178  | -2.288602 | -0.000156 |
| H | 2.152471  | -2.791366 | 0.884120  |
| H | 0.660019  | -2.399060 | -0.000747 |
| H | 2.153562  | -2.791497 | -0.883845 |
| C | 1.890801  | 2.853632  | 0.000193  |
| H | 1.300576  | 3.126683  | -0.879585 |
| H | 1.301351  | 3.126739  | 0.880476  |
| H | 2.816740  | 3.431556  | -0.000218 |
| H | -6.036494 | 0.198176  | -0.000116 |

30

4pzMe-trans-n ; E = -683.925382155 Hartree

|   |           |           |           |
|---|-----------|-----------|-----------|
| C | -3.180892 | 1.157125  | -0.000430 |
| C | -4.535487 | 0.845674  | -0.000463 |
| C | -2.223575 | 0.139981  | 0.000030  |
| H | -5.274455 | 1.641373  | -0.000843 |
| C | -4.941345 | -0.485701 | 0.000006  |
| C | -2.633511 | -1.199611 | 0.000518  |
| H | -1.876181 | -1.975663 | 0.000899  |
| C | -3.985930 | -1.504137 | 0.000503  |
| H | -4.304158 | -2.542904 | 0.000897  |
| H | -2.832807 | 2.185455  | -0.000770 |
| N | -0.879937 | 0.572200  | 0.000020  |
| N | -0.035756 | -0.364221 | -0.000120 |
| C | 1.281443  | 0.033150  | -0.000018 |
| C | 2.324807  | -0.894446 | -0.000292 |
| C | 1.913422  | 1.315294  | 0.000153  |
| N | 3.227447  | 1.171075  | -0.000005 |
| N | 3.455553  | -0.165360 | -0.000340 |
| C | 4.819097  | -0.626622 | 0.000272  |
| H | 5.335699  | -0.263740 | 0.892320  |
| H | 4.831742  | -1.716698 | -0.006098 |
| H | 5.339175  | -0.253230 | -0.885300 |
| C | 2.258024  | -2.376725 | -0.000372 |
| H | 2.736238  | -2.808015 | 0.885737  |
| H | 1.206577  | -2.668965 | -0.000464 |
| H | 2.736308  | -2.807950 | -0.886486 |
| C | 1.295148  | 2.666369  | 0.000397  |
| H | 0.651785  | 2.799191  | -0.873988 |
| H | 0.652000  | 2.798972  | 0.874974  |
| H | 2.078520  | 3.427340  | 0.000412  |
| H | -5.998789 | -0.733139 | 0.000005  |

52

4pzMeAmid2-cis-m ; E = -1478.16512866 Hartree

|   |           |           |           |
|---|-----------|-----------|-----------|
| C | 2.035439  | 1.335751  | -0.337922 |
| C | 2.148596  | 2.711376  | -0.142908 |
| C | 0.767755  | 0.749886  | -0.580195 |
| H | 3.117955  | 3.129477  | 0.090298  |
| C | 1.013829  | 3.507545  | -0.263346 |
| C | -0.347039 | 1.586171  | -0.758175 |
| C | -0.219331 | 2.966425  | -0.594383 |
| H | -1.094798 | 3.590823  | -0.717230 |
| N | 0.808593  | -0.645143 | -0.826174 |
| N | 0.009082  | -1.505130 | -0.373996 |
| C | -1.014627 | -1.295845 | 0.532813  |
| C | -1.280424 | -0.399380 | 1.586136  |
| C | -2.127398 | -2.188712 | 0.516897  |
| N | -3.023639 | -1.841133 | 1.420100  |
| N | -2.483844 | -0.774685 | 2.058825  |
| C | -3.258606 | -0.097133 | 3.069495  |
| H | -2.728102 | -0.079011 | 4.025844  |
| H | -3.471715 | 0.926820  | 2.748179  |
| H | -4.187197 | -0.654518 | 3.180074  |
| C | -0.518300 | 0.701240  | 2.228536  |
| H | -0.615067 | 0.649480  | 3.317476  |
| H | 0.539273  | 0.647463  | 1.975954  |
| H | -0.899360 | 1.673370  | 1.894690  |
| C | -2.337257 | -3.340752 | -0.398618 |
| H | -2.480430 | -3.003540 | -1.429547 |
| H | -1.462985 | -3.997416 | -0.394525 |
| H | -3.219905 | -3.902404 | -0.087396 |
| H | 1.103568  | 4.579765  | -0.120089 |
| N | 3.106737  | 0.450181  | -0.277544 |
| H | 2.870499  | -0.496047 | -0.562771 |
| N | -1.583643 | 1.031266  | -1.121819 |
| H | -1.568038 | 0.179055  | -1.664554 |
| C | 4.410870  | 0.725924  | 0.025516  |
| O | 4.850279  | 1.818432  | 0.357052  |
| C | -2.762342 | 1.323415  | -0.485672 |
| O | -2.896579 | 2.195957  | 0.364138  |
| C | 6.638545  | -0.556531 | 0.159342  |
| C | 6.966877  | -1.920482 | -0.082467 |
| C | 5.802936  | -2.531828 | -0.437503 |
| O | 4.781354  | -1.647969 | -0.432424 |
| C | 5.298889  | -0.441771 | -0.066841 |
| H | 7.289908  | 0.249760  | 0.460796  |
| H | 7.937596  | -2.387709 | -0.004407 |
| H | 5.548663  | -3.544249 | -0.711106 |
| C | -5.185447 | 0.471127  | -0.447777 |
| C | -5.828273 | -0.595717 | -1.135164 |
| C | -4.881134 | -1.150617 | -1.940381 |
| O | -3.702000 | -0.504136 | -1.803920 |
| C | -3.894878 | 0.484999  | -0.886570 |
| H | -5.602637 | 1.148150  | 0.282121  |
| H | -6.856379 | -0.913288 | -1.043432 |
| H | -4.890359 | -1.972275 | -2.639764 |

52

4pzMeAmid2-cis-n ; E = -1478.16360202 Hartree

|   |          |          |           |
|---|----------|----------|-----------|
| C | 2.023987 | 1.370093 | -0.136164 |
| C | 2.158129 | 2.685677 | 0.307646  |
| C | 0.746345 | 0.853027 | -0.438948 |
| H | 3.137903 | 3.051646 | 0.580829  |

|   |           |           |           |
|---|-----------|-----------|-----------|
| C | 1.023920  | 3.486672  | 0.391169  |
| C | -0.371418 | 1.704422  | -0.417057 |
| C | -0.230366 | 3.023871  | 0.014619  |
| H | -1.104353 | 3.659505  | 0.059222  |
| N | 0.716250  | -0.471540 | -0.945063 |
| N | -0.084758 | -1.354669 | -0.538616 |
| C | -0.927175 | -1.222850 | 0.555741  |
| C | -2.112925 | -1.965723 | 0.581914  |
| C | -0.863727 | -0.574320 | 1.836722  |
| N | -1.938412 | -0.882568 | 2.542790  |
| N | -2.689232 | -1.692952 | 1.762654  |
| C | -3.998434 | -2.091288 | 2.211991  |
| H | -4.775685 | -1.552818 | 1.659503  |
| H | -4.140033 | -3.166779 | 2.078083  |
| H | -4.065163 | -1.842148 | 3.269972  |
| C | -2.686467 | -2.878754 | -0.435345 |
| H | -3.641788 | -2.512284 | -0.825110 |
| H | -1.980372 | -2.966921 | -1.262727 |
| H | -2.857566 | -3.875851 | -0.014693 |
| C | 0.219707  | 0.220652  | 2.478348  |
| H | 1.205125  | -0.189922 | 2.242733  |
| H | 0.208631  | 1.263108  | 2.148448  |
| H | 0.076251  | 0.198200  | 3.560377  |
| H | 1.126820  | 4.509789  | 0.738977  |
| N | 3.082527  | 0.475431  | -0.266397 |
| H | 2.831306  | -0.404422 | -0.705774 |
| N | -1.597834 | 1.209930  | -0.876112 |
| H | -1.560243 | 0.425003  | -1.510893 |
| C | 4.399221  | 0.678930  | 0.042823  |
| O | 4.865188  | 1.693203  | 0.542111  |
| C | -2.824276 | 1.504474  | -0.344494 |
| O | -3.036754 | 2.323443  | 0.533939  |
| C | 6.606830  | -0.636204 | -0.105211 |
| C | 6.905019  | -1.943835 | -0.582689 |
| C | 5.722076  | -2.471415 | -1.002905 |
| O | 4.716325  | -1.587912 | -0.820255 |
| C | 5.264199  | -0.467501 | -0.271110 |
| H | 7.279542  | 0.098948  | 0.309829  |
| H | 7.869121  | -2.430004 | -0.611568 |
| H | 5.443438  | -3.419746 | -1.435942 |
| C | -5.242885 | 0.648692  | -0.573481 |
| C | -5.847535 | -0.271885 | -1.478407 |
| C | -4.857747 | -0.681807 | -2.319218 |
| O | -3.685412 | -0.088083 | -1.995256 |
| C | -3.929041 | 0.725201  | -0.929354 |
| H | -5.700186 | 1.199255  | 0.234837  |
| H | -6.882347 | -0.580420 | -1.509762 |
| H | -4.829584 | -1.351542 | -3.164988 |

52

4pzMeAmid2-trans-m ; E = -1478.18685783 Hartree

|   |           |           |           |
|---|-----------|-----------|-----------|
| C | 1.349149  | -2.178837 | -0.029898 |
| C | 1.365650  | -3.568806 | 0.035038  |
| C | 0.115115  | -1.467658 | -0.079163 |
| H | 2.313096  | -4.087036 | 0.069428  |
| C | 0.151882  | -4.245914 | 0.051867  |
| C | -1.108631 | -2.195212 | -0.061077 |
| C | -1.071319 | -3.591624 | 0.007379  |
| H | -2.004237 | -4.135852 | 0.026719  |

|   |           |           |           |
|---|-----------|-----------|-----------|
| N | 0.279183  | -0.090523 | -0.089314 |
| N | -0.726867 | 0.650943  | -0.298299 |
| C | -0.490624 | 2.006034  | -0.196399 |
| C | 0.503999  | 2.701756  | 0.501211  |
| C | -1.318539 | 3.004310  | -0.777067 |
| N | -0.869356 | 4.211024  | -0.473883 |
| N | 0.222072  | 4.005329  | 0.299828  |
| C | 0.898410  | 5.147472  | 0.861788  |
| H | 0.707904  | 5.235006  | 1.936505  |
| H | 1.976187  | 5.079620  | 0.693190  |
| H | 0.505952  | 6.028380  | 0.356044  |
| C | 1.613917  | 2.227675  | 1.365140  |
| H | 1.833027  | 2.939769  | 2.166042  |
| H | 1.346620  | 1.266303  | 1.809415  |
| H | 2.532790  | 2.060924  | 0.792676  |
| C | -2.488910 | 2.809134  | -1.674033 |
| H | -2.165404 | 2.587826  | -2.696921 |
| H | -3.098906 | 1.967888  | -1.338840 |
| H | -3.094785 | 3.717279  | -1.700798 |
| H | 0.159305  | -5.330917 | 0.099120  |
| N | 2.500094  | -1.401570 | -0.065052 |
| H | 2.308060  | -0.407833 | -0.138681 |
| N | -2.295155 | -1.477218 | -0.079093 |
| H | -2.163026 | -0.466850 | -0.184590 |
| C | 3.802126  | -1.811194 | -0.008803 |
| O | 4.188445  | -2.965825 | 0.102147  |
| C | -3.567678 | -1.965313 | 0.070520  |
| O | -3.884294 | -3.143848 | 0.149807  |
| C | 6.138802  | -0.741435 | -0.066966 |
| C | 6.572614  | 0.607001  | -0.212495 |
| C | 5.442794  | 1.356993  | -0.324544 |
| O | 4.342229  | 0.572311  | -0.257512 |
| C | 4.776710  | -0.711573 | -0.099806 |
| H | 6.736990  | -1.632947 | 0.045249  |
| H | 7.588729  | 0.972694  | -0.234329 |
| H | 5.262053  | 2.412825  | -0.455964 |
| C | -5.957256 | -1.041565 | 0.258898  |
| C | -6.469768 | 0.285301  | 0.312844  |
| C | -5.390363 | 1.110602  | 0.227091  |
| O | -4.250089 | 0.391440  | 0.123356  |
| C | -4.603595 | -0.924319 | 0.141960  |
| H | -6.497944 | -1.974862 | 0.302128  |
| H | -7.502220 | 0.589018  | 0.404932  |
| H | -5.271246 | 2.183297  | 0.226064  |

52

4pzMeAmid2-trans-n ; E = -1478.18769106 Hartree

|   |           |           |           |
|---|-----------|-----------|-----------|
| C | 1.606692  | -2.060472 | -0.063518 |
| C | 1.731104  | -3.447063 | -0.094121 |
| C | 0.320409  | -1.445857 | -0.067752 |
| H | 2.716565  | -3.889736 | -0.094239 |
| C | 0.576022  | -4.217804 | -0.126097 |
| C | -0.840744 | -2.269835 | -0.102790 |
| C | -0.694752 | -3.659866 | -0.128747 |
| H | -1.581981 | -4.275588 | -0.148250 |
| N | 0.373424  | -0.060936 | 0.008001  |
| N | -0.689414 | 0.605730  | -0.166452 |
| C | -0.563354 | 1.970989  | -0.010082 |
| C | -1.509531 | 2.873656  | -0.497193 |

|   |           |           |           |
|---|-----------|-----------|-----------|
| C | 0.412842  | 2.769159  | 0.660337  |
| N | 0.081280  | 4.047960  | 0.584156  |
| N | -1.068989 | 4.091256  | -0.126743 |
| C | -1.669535 | 5.367222  | -0.418714 |
| H | -1.669016 | 5.566519  | -1.494997 |
| H | -2.698483 | 5.408853  | -0.049257 |
| H | -1.072496 | 6.123039  | 0.089249  |
| C | -2.729447 | 2.651648  | -1.310637 |
| H | -2.600816 | 3.017981  | -2.335764 |
| H | -2.950326 | 1.585052  | -1.353963 |
| H | -3.596883 | 3.168419  | -0.885353 |
| C | 1.621636  | 2.347619  | 1.416554  |
| H | 1.401654  | 1.490630  | 2.059672  |
| H | 2.428772  | 2.040995  | 0.745860  |
| H | 1.974154  | 3.179571  | 2.030256  |
| H | 0.669373  | -5.299527 | -0.151994 |
| N | 2.696944  | -1.200634 | -0.045958 |
| H | 2.434617  | -0.220550 | -0.033308 |
| N | -2.083212 | -1.650905 | -0.077852 |
| H | -2.031543 | -0.628574 | -0.106155 |
| C | 4.026465  | -1.520976 | -0.050581 |
| O | 4.492028  | -2.651671 | -0.041620 |
| C | -3.311174 | -2.250448 | 0.015845  |
| O | -3.532710 | -3.453221 | 0.010457  |
| C | 6.284279  | -0.291897 | -0.052502 |
| C | 6.621171  | 1.090792  | -0.096504 |
| C | 5.440384  | 1.766412  | -0.141286 |
| O | 4.399550  | 0.902946  | -0.128628 |
| C | 4.922732  | -0.354824 | -0.072331 |
| H | 6.944350  | -1.145047 | -0.011625 |
| H | 7.608959  | 1.527752  | -0.095656 |
| H | 5.182673  | 2.813565  | -0.183288 |
| C | -5.771872 | -1.550235 | 0.231001  |
| C | -6.400856 | -0.279179 | 0.354841  |
| C | -5.398562 | 0.641259  | 0.327109  |
| O | -4.197655 | 0.033828  | 0.194293  |
| C | -4.433612 | -1.307127 | 0.135955  |
| H | -6.227139 | -2.528821 | 0.215551  |
| H | -7.456616 | -0.073894 | 0.454717  |
| H | -5.377528 | 1.717948  | 0.393744  |

30

4pzMeCl1A-cis-m ; E = -1143.34071795 Hartree

|    |           |           |           |
|----|-----------|-----------|-----------|
| C  | -2.484252 | -0.156319 | -0.115080 |
| C  | -3.238630 | 0.889535  | 0.404490  |
| C  | -1.302573 | -0.575209 | 0.504786  |
| H  | -4.141719 | 1.198905  | -0.110471 |
| C  | -2.826363 | 1.518746  | 1.573523  |
| C  | -0.906599 | 0.064122  | 1.685743  |
| H  | -0.002482 | -0.273007 | 2.182009  |
| C  | -1.661332 | 1.100659  | 2.215150  |
| H  | -1.342336 | 1.581141  | 3.134809  |
| Cl | -2.980206 | -0.915692 | -1.593693 |
| N  | -0.660712 | -1.758318 | 0.055273  |
| N  | 0.575101  | -1.834499 | -0.112681 |
| C  | 1.434216  | -0.734452 | -0.112750 |
| C  | 1.325486  | 0.550346  | -0.657414 |
| C  | 2.778005  | -0.841009 | 0.337377  |
| N  | 3.428805  | 0.292431  | 0.136198  |

|   |           |           |           |
|---|-----------|-----------|-----------|
| N | 2.541558  | 1.108892  | -0.474919 |
| C | 2.988065  | 2.403570  | -0.926078 |
| H | 3.085292  | 2.433625  | -2.016374 |
| H | 2.295855  | 3.185897  | -0.604897 |
| H | 3.964638  | 2.574647  | -0.475837 |
| C | 0.233789  | 1.230357  | -1.399138 |
| H | 0.633512  | 1.933254  | -2.135074 |
| H | -0.374711 | 0.496747  | -1.932830 |
| H | -0.433878 | 1.777891  | -0.723788 |
| C | 3.410244  | -2.013358 | 0.998203  |
| H | 3.107167  | -2.094294 | 2.047713  |
| H | 3.100774  | -2.936298 | 0.500055  |
| H | 4.497345  | -1.922325 | 0.962545  |
| H | -3.419543 | 2.329098  | 1.984961  |

30

4pzMeCl1A-cis-n ; E = -1143.34158459 Hartree

|    |           |           |           |
|----|-----------|-----------|-----------|
| C  | 2.617707  | -0.232942 | 0.006436  |
| C  | 3.427454  | 0.894665  | 0.067394  |
| C  | 1.406370  | -0.214660 | -0.692132 |
| H  | 4.350682  | 0.854617  | 0.635239  |
| C  | 3.042868  | 2.054190  | -0.597329 |
| C  | 1.038825  | 0.956431  | -1.364118 |
| H  | 0.110101  | 0.964101  | -1.925216 |
| C  | 1.849867  | 2.081374  | -1.317165 |
| H  | 1.551203  | 2.981738  | -1.844833 |
| Cl | 3.078495  | -1.666860 | 0.865236  |
| N  | 0.690451  | -1.420757 | -0.884228 |
| N  | -0.542164 | -1.510411 | -0.703557 |
| C  | -1.336075 | -0.545360 | -0.081052 |
| C  | -2.697308 | -0.504012 | -0.391653 |
| C  | -1.173069 | 0.376392  | 1.004516  |
| N  | -2.337404 | 0.937412  | 1.293616  |
| N  | -3.234455 | 0.416381  | 0.427250  |
| C  | -4.602764 | 0.864772  | 0.472755  |
| H  | -4.878777 | 1.381073  | -0.451858 |
| H  | -5.283633 | 0.022937  | 0.628113  |
| H  | -4.683556 | 1.554703  | 1.311362  |
| C  | -3.451843 | -1.272221 | -1.410470 |
| H  | -3.718109 | -0.655898 | -2.276956 |
| H  | -2.821117 | -2.093534 | -1.757138 |
| H  | -4.378302 | -1.684902 | -0.998235 |
| C  | 0.007539  | 0.681048  | 1.859183  |
| H  | 0.553922  | -0.229938 | 2.119728  |
| H  | 0.710229  | 1.353894  | 1.358499  |
| H  | -0.338433 | 1.158911  | 2.777845  |
| H  | 3.678955  | 2.932481  | -0.555317 |

30

4pzMeCl1A-trans-m ; E = -1143.36111639 Hartree

|    |           |           |           |
|----|-----------|-----------|-----------|
| C  | -2.819880 | -0.634036 | 0.000209  |
| C  | -4.173094 | -0.311512 | 0.000291  |
| C  | -1.836812 | 0.366461  | -0.000315 |
| H  | -4.908281 | -1.108636 | 0.000732  |
| C  | -4.561785 | 1.022137  | -0.000205 |
| C  | -2.253249 | 1.705165  | -0.000819 |
| H  | -1.480154 | 2.466103  | -0.001255 |
| C  | -3.598188 | 2.031636  | -0.000764 |
| H  | -3.901943 | 3.073999  | -0.001189 |
| Cl | -2.364770 | -2.310294 | 0.000845  |

|   |           |           |           |
|---|-----------|-----------|-----------|
| N | -0.493406 | -0.043430 | -0.000489 |
| N | 0.337694  | 0.907652  | 0.000204  |
| C | 1.654758  | 0.522053  | 0.000039  |
| C | 2.240045  | -0.754548 | -0.000440 |
| C | 2.740785  | 1.438906  | 0.000500  |
| N | 3.892786  | 0.792689  | 0.000332  |
| N | 3.565111  | -0.526583 | -0.000250 |
| C | 4.632346  | -1.497432 | -0.000367 |
| H | 5.564796  | -0.935365 | -0.000682 |
| H | 4.589761  | -2.128989 | 0.891530  |
| H | 4.589270  | -2.129196 | -0.892081 |
| C | 1.622767  | -2.102473 | -0.000863 |
| H | 0.969988  | -2.221084 | 0.868768  |
| H | 0.970770  | -2.220955 | -0.871096 |
| H | 2.374700  | -2.895193 | -0.000571 |
| C | 2.678640  | 2.924643  | 0.001020  |
| H | 2.145266  | 3.294150  | -0.879919 |
| H | 2.142765  | 3.293404  | 0.880734  |
| H | 3.689192  | 3.336918  | 0.002549  |
| H | -5.618339 | 1.271538  | -0.000178 |

30

4pzMeCl1A-trans-n ; E = -1143.36175490 Hartree

|    |           |           |           |
|----|-----------|-----------|-----------|
| C  | 2.939574  | -0.442611 | 0.000708  |
| C  | 4.240014  | 0.052216  | 0.000725  |
| C  | 1.836128  | 0.424011  | -0.000501 |
| H  | 5.071326  | -0.644083 | 0.001725  |
| C  | 4.454904  | 1.424519  | -0.000557 |
| C  | 2.078279  | 1.804750  | -0.001817 |
| H  | 1.215352  | 2.461765  | -0.002836 |
| C  | 3.369924  | 2.302001  | -0.001842 |
| H  | 3.537198  | 3.374793  | -0.002923 |
| Cl | 2.704950  | -2.161781 | 0.002331  |
| N  | 0.556664  | -0.157037 | -0.000642 |
| N  | -0.390947 | 0.676220  | 0.000172  |
| C  | -1.646587 | 0.121495  | -0.000197 |
| C  | -2.800085 | 0.909768  | 0.000541  |
| C  | -2.108855 | -1.232466 | -0.001533 |
| N  | -3.429842 | -1.255752 | -0.001637 |
| N  | -3.826719 | 0.042259  | -0.000577 |
| C  | -5.238466 | 0.324214  | 0.001639  |
| H  | -5.701854 | -0.099108 | 0.896228  |
| H  | -5.391833 | 1.403454  | -0.009006 |
| H  | -5.706738 | -0.117448 | -0.881290 |
| C  | -2.923621 | 2.388310  | 0.002280  |
| H  | -3.453330 | 2.753076  | 0.888903  |
| H  | -1.918978 | 2.814366  | 0.002498  |
| H  | -3.453727 | 2.755144  | -0.883271 |
| C  | -1.318368 | -2.489681 | -0.002877 |
| H  | -0.659899 | -2.534236 | -0.875069 |
| H  | -0.659740 | -2.535972 | 0.869095  |
| H  | -1.993884 | -3.347709 | -0.003703 |
| H  | 5.470810  | 1.807246  | -0.000599 |

30

4pzMeCl1B-cis-m ; E = -1143.33848826 Hartree

|   |           |           |           |
|---|-----------|-----------|-----------|
| C | -2.607504 | 0.240785  | -1.348653 |
| C | -3.561580 | 0.904634  | -0.593562 |
| C | -1.590769 | -0.507738 | -0.743907 |
| H | -4.325387 | 1.496962  | -1.087416 |

|    |           |           |           |
|----|-----------|-----------|-----------|
| C  | -3.544796 | 0.792933  | 0.795358  |
| C  | -1.615532 | -0.650221 | 0.650944  |
| Cl | -0.490446 | -1.685155 | 1.471308  |
| C  | -2.582139 | 0.003069  | 1.411983  |
| H  | -2.573766 | -0.125076 | 2.489179  |
| H  | -2.613372 | 0.292245  | -2.433260 |
| N  | -0.730316 | -1.231294 | -1.613491 |
| N  | 0.516599  | -1.162587 | -1.561818 |
| C  | 1.234183  | -0.281652 | -0.758200 |
| C  | 1.065873  | 1.058471  | -0.387281 |
| C  | 2.496751  | -0.663403 | -0.226537 |
| N  | 3.040530  | 0.332377  | 0.449807  |
| N  | 2.171525  | 1.360737  | 0.327561  |
| C  | 2.535051  | 2.640897  | 0.882249  |
| H  | 2.786156  | 3.360474  | 0.095763  |
| H  | 1.723762  | 3.043885  | 1.493666  |
| H  | 3.411530  | 2.474478  | 1.506509  |
| C  | 0.044739  | 2.083445  | -0.727220 |
| H  | 0.486141  | 3.083429  | -0.754010 |
| H  | -0.382944 | 1.879217  | -1.709501 |
| H  | -0.782205 | 2.089711  | -0.008151 |
| C  | 3.133007  | -2.002750 | -0.319842 |
| H  | 2.646097  | -2.715585 | 0.354112  |
| H  | 3.032736  | -2.398387 | -1.334200 |
| H  | 4.188703  | -1.936881 | -0.050609 |
| H  | -4.291947 | 1.297724  | 1.399284  |

30

4pzMeCl1B-cis-n ; E = -1143.34017951 Hartree

|    |           |           |           |
|----|-----------|-----------|-----------|
| C  | -2.760390 | -0.465524 | 1.251107  |
| C  | -3.748291 | -0.910934 | 0.387205  |
| C  | -1.706331 | 0.334674  | 0.796429  |
| H  | -4.541097 | -1.552806 | 0.758065  |
| C  | -3.726094 | -0.521395 | -0.950722 |
| C  | -1.721634 | 0.754869  | -0.540692 |
| Cl | -0.532140 | 1.866253  | -1.146245 |
| C  | -2.722046 | 0.323418  | -1.407792 |
| H  | -2.704688 | 0.661697  | -2.438262 |
| H  | -2.766396 | -0.738434 | 2.301824  |
| N  | -0.804491 | 0.830792  | 1.772124  |
| N  | 0.433805  | 0.681863  | 1.699941  |
| C  | 1.107531  | -0.095861 | 0.762730  |
| C  | 2.419110  | 0.266659  | 0.444660  |
| C  | 0.880056  | -1.324693 | 0.059530  |
| N  | 1.961923  | -1.649584 | -0.631769 |
| N  | 2.864479  | -0.668791 | -0.409184 |
| C  | 4.129481  | -0.707713 | -1.097066 |
| H  | 4.176006  | 0.054666  | -1.881238 |
| H  | 4.953719  | -0.550693 | -0.396558 |
| H  | 4.218559  | -1.695150 | -1.547749 |
| C  | 3.193344  | 1.450679  | 0.885235  |
| H  | 3.256446  | 2.209413  | 0.096867  |
| H  | 2.681756  | 1.895008  | 1.741377  |
| H  | 4.214052  | 1.182417  | 1.175940  |
| C  | -0.259425 | -2.284238 | 0.081973  |
| H  | -0.620186 | -2.449762 | 1.100223  |
| H  | -1.106841 | -1.930635 | -0.511976 |
| H  | 0.081801  | -3.236025 | -0.330047 |
| H  | -4.498643 | -0.855610 | -1.635677 |



30

4pzMeCl1B-trans-m ; E = -1143.35362662 Hartree

|    |           |           |           |
|----|-----------|-----------|-----------|
| C  | -2.571403 | -1.752212 | 0.546774  |
| C  | -3.952292 | -1.769805 | 0.657787  |
| C  | -1.878952 | -0.611985 | 0.120120  |
| H  | -4.458096 | -2.662628 | 1.011271  |
| C  | -4.681589 | -0.638932 | 0.300601  |
| C  | -2.632174 | 0.514278  | -0.257907 |
| Cl | -1.909189 | 1.942772  | -0.931438 |
| C  | -4.021548 | 0.490522  | -0.168186 |
| H  | -4.578306 | 1.369137  | -0.475935 |
| H  | -1.971967 | -2.620317 | 0.802900  |
| N  | -0.480747 | -0.766121 | 0.052441  |
| N  | 0.175741  | 0.278182  | 0.314895  |
| C  | 1.541072  | 0.156093  | 0.216153  |
| C  | 2.354319  | -0.911820 | -0.191727 |
| C  | 2.433664  | 1.216358  | 0.529347  |
| N  | 3.685620  | 0.841038  | 0.336663  |
| N  | 3.612060  | -0.444958 | -0.096824 |
| C  | 4.840271  | -1.132734 | -0.412260 |
| H  | 5.651250  | -0.445922 | -0.175542 |
| H  | 4.946911  | -2.041031 | 0.187245  |
| H  | 4.885821  | -1.393445 | -1.473803 |
| C  | 2.005527  | -2.278124 | -0.651801 |
| H  | 1.557897  | -2.855136 | 0.163359  |
| H  | 1.245438  | -2.225128 | -1.435348 |
| H  | 2.878441  | -2.816513 | -1.028870 |
| C  | 2.086436  | 2.578494  | 1.013912  |
| H  | 1.344080  | 3.043514  | 0.359632  |
| H  | 1.648538  | 2.537238  | 2.016066  |
| H  | 2.982364  | 3.200935  | 1.046858  |
| H  | -5.764859 | -0.635602 | 0.369527  |

30

4pzMeCl1B-trans-n ; E = -1143.35582843 Hartree

|    |           |           |           |
|----|-----------|-----------|-----------|
| C  | -2.780296 | 1.618789  | 0.469964  |
| C  | -4.147984 | 1.473054  | 0.635340  |
| C  | -1.962952 | 0.547578  | 0.086607  |
| H  | -4.750364 | 2.318438  | 0.952126  |
| C  | -4.740445 | 0.239606  | 0.378761  |
| C  | -2.581184 | -0.685615 | -0.189517 |
| Cl | -1.709314 | -2.059611 | -0.801034 |
| C  | -3.958699 | -0.828199 | -0.045150 |
| H  | -4.409935 | -1.787386 | -0.275471 |
| H  | -2.286309 | 2.569311  | 0.645678  |
| N  | -0.599482 | 0.875053  | -0.042694 |
| N  | 0.195074  | -0.064889 | 0.227142  |
| C  | 1.528979  | 0.230528  | 0.084686  |
| C  | 2.510265  | -0.725059 | 0.356871  |
| C  | 2.239082  | 1.403196  | -0.319717 |
| N  | 3.539940  | 1.173374  | -0.291425 |
| N  | 3.682684  | -0.113095 | 0.117622  |
| C  | 5.013732  | -0.648003 | 0.239363  |
| H  | 5.583649  | -0.067376 | 0.968885  |
| H  | 4.956559  | -1.685803 | 0.568087  |
| H  | 5.523463  | -0.600687 | -0.725976 |
| C  | 2.341382  | -2.128534 | 0.807156  |
| H  | 2.814938  | -2.305549 | 1.778837  |
| H  | 1.272122  | -2.328052 | 0.899914  |

|   |           |           |           |
|---|-----------|-----------|-----------|
| H | 2.764564  | -2.839638 | 0.089612  |
| C | 1.704733  | 2.727424  | -0.729503 |
| H | 1.034600  | 2.626466  | -1.587943 |
| H | 1.108363  | 3.170873  | 0.073075  |
| H | 2.531431  | 3.394081  | -0.983797 |
| H | -5.811933 | 0.107009  | 0.490879  |

30

4pzMeCl2-cis-m ; E = -1602.77490089 Hartree

|    |           |           |           |
|----|-----------|-----------|-----------|
| C  | 2.468649  | -0.367725 | -0.280356 |
| C  | 3.289523  | -0.272139 | 0.833776  |
| C  | 1.326722  | 0.431277  | -0.440258 |
| H  | 4.149636  | -0.926525 | 0.919501  |
| C  | 2.992098  | 0.663696  | 1.818075  |
| C  | 1.072399  | 1.386680  | 0.557044  |
| Cl | -0.244245 | 2.502176  | 0.393683  |
| C  | 1.889308  | 1.496838  | 1.677488  |
| H  | 1.656635  | 2.246757  | 2.425225  |
| Cl | 2.824184  | -1.553451 | -1.495137 |
| N  | 0.648683  | 0.401961  | -1.685457 |
| N  | -0.576347 | 0.187008  | -1.796952 |
| C  | -1.408899 | -0.215577 | -0.761426 |
| C  | -1.258733 | -1.084627 | 0.328483  |
| C  | -2.774444 | 0.183104  | -0.741278 |
| N  | -3.401145 | -0.351032 | 0.290782  |
| N  | -2.476579 | -1.120266 | 0.909798  |
| C  | -2.890923 | -1.928838 | 2.029759  |
| H  | -2.940862 | -2.988850 | 1.759571  |
| H  | -2.207031 | -1.803172 | 2.872710  |
| H  | -3.884502 | -1.585753 | 2.313762  |
| C  | -0.142684 | -1.952786 | 0.784226  |
| H  | -0.522236 | -2.857292 | 1.266954  |
| H  | 0.468616  | -2.261959 | -0.065807 |
| H  | 0.514251  | -1.435885 | 1.492772  |
| C  | -3.441076 | 1.125465  | -1.676563 |
| H  | -3.150221 | 2.159763  | -1.464531 |
| H  | -3.141544 | 0.910930  | -2.705923 |
| H  | -4.525320 | 1.044166  | -1.581744 |
| H  | 3.629697  | 0.753610  | 2.691205  |

30

4pzMeCl2-cis-n ; E = -1602.77645797 Hartree

|    |           |           |           |
|----|-----------|-----------|-----------|
| C  | 2.574859  | -0.517274 | -0.103579 |
| C  | 3.461171  | 0.075271  | 0.783426  |
| C  | 1.428398  | 0.144834  | -0.564737 |
| H  | 4.321740  | -0.485031 | 1.130959  |
| C  | 3.225471  | 1.376820  | 1.212912  |
| C  | 1.234084  | 1.465828  | -0.134142 |
| Cl | -0.101367 | 2.396533  | -0.735389 |
| C  | 2.116973  | 2.075306  | 0.750936  |
| H  | 1.928829  | 3.096199  | 1.063730  |
| Cl | 2.846606  | -2.151225 | -0.614551 |
| N  | 0.667289  | -0.447469 | -1.600579 |
| N  | -0.554034 | -0.686479 | -1.505580 |
| C  | -1.320294 | -0.572369 | -0.353578 |
| C  | -2.693219 | -0.358142 | -0.514354 |
| C  | -1.129751 | -0.725977 | 1.060784  |
| N  | -2.291175 | -0.593680 | 1.681825  |
| N  | -3.211883 | -0.347645 | 0.722443  |
| C  | -4.575180 | -0.085074 | 1.107733  |

|   |           |           |           |
|---|-----------|-----------|-----------|
| H | -4.823122 | 0.973743  | 0.983099  |
| H | -5.265546 | -0.686882 | 0.511367  |
| H | -4.669289 | -0.357016 | 2.158066  |
| C | -3.464747 | -0.135410 | -1.759473 |
| H | -3.748509 | 0.916602  | -1.876765 |
| H | -2.835469 | -0.413525 | -2.607053 |
| H | -4.380646 | -0.734614 | -1.779979 |
| C | 0.062870  | -1.106823 | 1.867988  |
| H | 0.614228  | -1.927433 | 1.401099  |
| H | 0.756363  | -0.270891 | 1.996584  |
| H | -0.276895 | -1.428762 | 2.854294  |
| H | 3.914057  | 1.852355  | 1.903315  |

30

4pzMeCl2-trans-m ; E = -1602.78838145 Hartree

|    |           |           |           |
|----|-----------|-----------|-----------|
| C  | -2.546210 | -1.155109 | 0.253382  |
| C  | -3.923756 | -1.013403 | 0.331489  |
| C  | -1.697215 | -0.080622 | -0.057761 |
| H  | -4.533922 | -1.869480 | 0.595569  |
| C  | -4.493305 | 0.226446  | 0.067156  |
| C  | -2.307900 | 1.156706  | -0.329580 |
| Cl | -1.376852 | 2.532604  | -0.832726 |
| C  | -3.689460 | 1.306869  | -0.271769 |
| H  | -4.122596 | 2.274406  | -0.499079 |
| Cl | -1.847371 | -2.709113 | 0.590381  |
| N  | -0.327582 | -0.356310 | -0.180944 |
| N  | 0.408322  | 0.501182  | 0.350529  |
| C  | 1.750147  | 0.275098  | 0.214740  |
| C  | 2.459952  | -0.782787 | -0.378865 |
| C  | 2.735547  | 1.167022  | 0.715694  |
| N  | 3.945506  | 0.711077  | 0.452885  |
| N  | 3.754978  | -0.465312 | -0.203531 |
| C  | 4.938205  | -1.180818 | -0.612140 |
| H  | 5.541490  | -1.420742 | 0.266256  |
| H  | 4.661526  | -2.100618 | -1.124389 |
| H  | 5.527609  | -0.554971 | -1.286015 |
| C  | 1.945345  | -2.001440 | -1.050063 |
| H  | 1.206160  | -2.489502 | -0.409872 |
| H  | 1.412271  | -1.731422 | -1.966881 |
| H  | 2.736215  | -2.712381 | -1.296424 |
| C  | 2.515958  | 2.447881  | 1.437346  |
| H  | 1.861940  | 3.109278  | 0.862553  |
| H  | 2.027077  | 2.272409  | 2.400481  |
| H  | 3.471848  | 2.944996  | 1.610751  |
| H  | -5.570243 | 0.349159  | 0.116569  |

30

4pzMeCl2-trans-n ; E = -1602.79095332 Hartree

|    |           |           |           |
|----|-----------|-----------|-----------|
| C  | -2.706732 | 0.966382  | 0.294741  |
| C  | -4.049104 | 0.651167  | 0.446229  |
| C  | -1.744124 | 0.002651  | -0.048509 |
| H  | -4.749932 | 1.427444  | 0.731173  |
| C  | -4.467852 | -0.655605 | 0.226987  |
| C  | -2.204113 | -1.307312 | -0.270607 |
| Cl | -1.130742 | -2.564576 | -0.801225 |
| C  | -3.550381 | -1.631459 | -0.139149 |
| H  | -3.866889 | -2.650411 | -0.331443 |
| Cl | -2.194970 | 2.600836  | 0.577733  |
| N  | -0.427025 | 0.449559  | -0.250390 |
| N  | 0.452774  | -0.297581 | 0.254155  |

|   |           |           |           |
|---|-----------|-----------|-----------|
| C | 1.749562  | 0.094302  | 0.037288  |
| C | 2.822339  | -0.655632 | 0.525535  |
| C | 2.335523  | 1.211643  | -0.635506 |
| N | 3.651846  | 1.140375  | -0.558098 |
| N | 3.924751  | 0.008476  | 0.142536  |
| C | 5.303678  | -0.330303 | 0.381135  |
| H | 5.789598  | 0.466859  | 0.948904  |
| H | 5.354073  | -1.260657 | 0.947002  |
| H | 5.825438  | -0.455223 | -0.570683 |
| C | 2.797720  | -1.922116 | 1.297621  |
| H | 3.269407  | -1.809885 | 2.279675  |
| H | 1.755166  | -2.210400 | 1.443888  |
| H | 3.308943  | -2.732051 | 0.766501  |
| C | 1.664358  | 2.336034  | -1.336253 |
| H | 1.054972  | 1.966503  | -2.166120 |
| H | 0.976747  | 2.856223  | -0.663536 |
| H | 2.414420  | 3.034025  | -1.713732 |
| H | -5.516517 | -0.913158 | 0.333244  |

30

4pzMeFlA-cis-m ; E = -783.046043499 Hartree

|   |           |           |           |
|---|-----------|-----------|-----------|
| C | -2.598813 | -0.215390 | -0.571423 |
| C | -3.467670 | 0.613072  | 0.117358  |
| C | -1.475726 | -0.782233 | 0.031219  |
| H | -4.314355 | 1.041235  | -0.408326 |
| C | -3.228643 | 0.867993  | 1.464920  |
| C | -1.253837 | -0.518219 | 1.386395  |
| H | -0.396435 | -0.971360 | 1.873251  |
| C | -2.123530 | 0.300161  | 2.096666  |
| H | -1.941714 | 0.489101  | 3.149860  |
| F | -2.795763 | -0.436377 | -1.877610 |
| N | -0.740314 | -1.765684 | -0.686112 |
| N | 0.508242  | -1.755578 | -0.740716 |
| C | 1.289505  | -0.673936 | -0.326286 |
| C | 1.149336  | 0.701813  | -0.529629 |
| C | 2.575906  | -0.841969 | 0.251588  |
| N | 3.160013  | 0.330705  | 0.436739  |
| N | 2.291720  | 1.242989  | -0.052342 |
| C | 2.687576  | 2.628337  | -0.094793 |
| H | 2.915122  | 2.946711  | -1.117678 |
| H | 1.901159  | 3.267936  | 0.313851  |
| H | 3.584840  | 2.720024  | 0.515363  |
| C | 0.100252  | 1.504934  | -1.207210 |
| H | 0.535577  | 2.351242  | -1.746426 |
| H | -0.441441 | 0.888794  | -1.927952 |
| H | -0.635478 | 1.891974  | -0.492248 |
| C | 3.213124  | -2.120424 | 0.664854  |
| H | 2.790942  | -2.494788 | 1.603803  |
| H | 3.042788  | -2.888011 | -0.095304 |
| H | 4.285699  | -1.975717 | 0.806327  |
| H | -3.907337 | 1.508396  | 2.019033  |

30

4pzMeFlA-cis-n ; E = -783.046721669 Hartree

|   |           |           |           |
|---|-----------|-----------|-----------|
| C | -2.772236 | 0.472286  | 0.383319  |
| C | -3.672640 | -0.534991 | 0.084504  |
| C | -1.591707 | 0.649349  | -0.339387 |
| H | -4.562680 | -0.642828 | 0.694951  |
| C | -3.408506 | -1.379488 | -0.990692 |
| C | -1.347739 | -0.200771 | -1.422084 |

|   |           |           |           |
|---|-----------|-----------|-----------|
| H | -0.445687 | -0.054859 | -2.007184 |
| C | -2.249077 | -1.208202 | -1.744457 |
| H | -2.047830 | -1.858630 | -2.589644 |
| F | -3.001363 | 1.269986  | 1.432162  |
| N | -0.804881 | 1.801848  | -0.086796 |
| N | 0.437758  | 1.748556  | 0.033301  |
| C | 1.175288  | 0.570193  | 0.175964  |
| C | 2.508523  | 0.552093  | -0.236261 |
| C | 0.978968  | -0.672165 | 0.860108  |
| N | 2.097204  | -1.381812 | 0.831961  |
| N | 2.995532  | -0.642212 | 0.145510  |
| C | 4.316235  | -1.169253 | -0.084739 |
| H | 4.500360  | -1.317227 | -1.153344 |
| H | 5.079944  | -0.498133 | 0.318959  |
| H | 4.369827  | -2.128100 | 0.428619  |
| C | 3.281846  | 1.587928  | -0.962111 |
| H | 3.440500  | 1.322791  | -2.013855 |
| H | 2.718972  | 2.523210  | -0.927959 |
| H | 4.264778  | 1.748819  | -0.507637 |
| C | -0.188082 | -1.182013 | 1.631857  |
| H | -0.665478 | -0.381023 | 2.203254  |
| H | -0.948843 | -1.615121 | 0.974825  |
| H | 0.154633  | -1.954147 | 2.323620  |
| H | -4.110756 | -2.169077 | -1.238014 |

30

4pzMeFlA-trans-m ; E = -783.066407739 Hartree

|   |           |           |           |
|---|-----------|-----------|-----------|
| C | -2.914792 | -1.002776 | -0.000028 |
| C | -4.285877 | -0.801279 | -0.000015 |
| C | -2.008510 | 0.063549  | -0.000001 |
| H | -4.944064 | -1.663195 | -0.000020 |
| C | -4.775156 | 0.500133  | 0.000010  |
| C | -2.524670 | 1.366091  | 0.000019  |
| H | -1.815310 | 2.186675  | 0.000035  |
| C | -3.893344 | 1.582919  | 0.000017  |
| H | -4.280315 | 2.597146  | 0.000033  |
| F | -2.446955 | -2.255317 | -0.000010 |
| N | -0.645966 | -0.274672 | 0.000009  |
| N | 0.132012  | 0.717616  | 0.000004  |
| C | 1.476896  | 0.419147  | 0.000003  |
| C | 2.178613  | -0.796191 | 0.000004  |
| C | 2.476391  | 1.431285  | 0.000001  |
| N | 3.684510  | 0.896153  | -0.000007 |
| N | 3.477999  | -0.444815 | -0.000010 |
| C | 4.615577  | -1.328585 | 0.000019  |
| H | 5.505599  | -0.701396 | 0.000073  |
| H | 4.616692  | -1.964729 | 0.890390  |
| H | 4.616770  | -1.964684 | -0.890384 |
| C | 1.731634  | -2.212968 | 0.000002  |
| H | 2.104236  | -2.744613 | 0.883673  |
| H | 0.642929  | -2.245398 | -0.000060 |
| H | 2.104354  | -2.744650 | -0.883595 |
| C | 2.275996  | 2.905030  | -0.000023 |
| H | 1.709432  | 3.223243  | -0.880224 |
| H | 1.709365  | 3.223256  | 0.880130  |
| H | 3.244014  | 3.409264  | 0.000007  |
| H | -5.847552 | 0.668834  | 0.000017  |

30

4pzMeFlA-trans-n ; E = -783.067189005 Hartree

|   |           |           |           |
|---|-----------|-----------|-----------|
| C | 3.052979  | -0.807998 | 0.000375  |
| C | 4.389003  | -0.438302 | 0.000472  |
| C | 2.021638  | 0.138552  | -0.000107 |
| H | 5.147648  | -1.213289 | 0.000877  |
| C | 4.715571  | 0.912893  | 0.000041  |
| C | 2.375895  | 1.494244  | -0.000555 |
| H | 1.572872  | 2.223153  | -0.000975 |
| C | 3.707276  | 1.878726  | -0.000482 |
| H | 3.966140  | 2.933009  | -0.000852 |
| F | 2.745474  | -2.107350 | 0.000795  |
| N | 0.709667  | -0.364935 | -0.000221 |
| N | -0.182496 | 0.527672  | -0.000044 |
| C | -1.472156 | 0.052214  | -0.000109 |
| C | -2.573392 | 0.910661  | -0.000110 |
| C | -2.018607 | -1.269294 | -0.000369 |
| N | -3.338877 | -1.210323 | -0.000519 |
| N | -3.653538 | 0.109253  | -0.000331 |
| C | -5.044461 | 0.479972  | 0.000924  |
| H | -5.535211 | 0.084938  | 0.893900  |
| H | -5.129009 | 1.566831  | -0.007013 |
| H | -5.539231 | 0.071543  | -0.883641 |
| C | -2.603414 | 2.394134  | 0.000342  |
| H | -3.109076 | 2.792848  | 0.886444  |
| H | -1.573540 | 2.755100  | 0.000591  |
| H | -3.108741 | 2.793419  | -0.885712 |
| C | -1.309358 | -2.574605 | -0.000600 |
| H | -0.655748 | -2.661942 | -0.873084 |
| H | -0.655644 | -2.662208 | 0.871776  |
| H | -2.038046 | -3.388017 | -0.000686 |
| H | 5.759179  | 1.211916  | 0.000097  |

30

4pzMeFlB-cis-m ; E = -783.046231322 Hartree

|   |           |           |           |
|---|-----------|-----------|-----------|
| C | -2.722297 | -0.149107 | -1.111189 |
| C | -3.626462 | 0.608964  | -0.378490 |
| C | -1.605889 | -0.730481 | -0.503564 |
| H | -4.473743 | 1.069163  | -0.876528 |
| C | -3.452948 | 0.759338  | 0.995643  |
| C | -1.478039 | -0.597423 | 0.883434  |
| F | -0.471700 | -1.211630 | 1.516695  |
| C | -2.378317 | 0.143271  | 1.630868  |
| H | -2.226728 | 0.216560  | 2.702577  |
| H | -2.849765 | -0.299627 | -2.178956 |
| N | -0.786264 | -1.584278 | -1.292343 |
| N | 0.463690  | -1.536237 | -1.254552 |
| C | 1.176500  | -0.533647 | -0.599333 |
| C | 1.022375  | 0.854442  | -0.573367 |
| C | 2.386580  | -0.794122 | 0.095833  |
| N | 2.914373  | 0.330296  | 0.549515  |
| N | 2.087241  | 1.310012  | 0.124488  |
| C | 2.453583  | 2.682725  | 0.365136  |
| H | 2.800986  | 3.170940  | -0.551837 |
| H | 1.608106  | 3.243192  | 0.772117  |
| H | 3.264614  | 2.670769  | 1.091747  |
| C | 0.040986  | 1.761744  | -1.222013 |
| H | 0.514839  | 2.693905  | -1.543081 |
| H | -0.386874 | 1.280127  | -2.102879 |
| H | -0.791156 | 2.008631  | -0.552343 |
| C | 2.983975  | -2.125101 | 0.378176  |

|   |           |           |           |
|---|-----------|-----------|-----------|
| H | 2.413673  | -2.653106 | 1.149683  |
| H | 2.965710  | -2.747532 | -0.521023 |
| H | 4.012615  | -2.010015 | 0.724477  |
| H | -4.160543 | 1.339492  | 1.579225  |

30

4pzMeFlB-cis-n ; E = -783.047470797 Hartree

|   |           |           |           |
|---|-----------|-----------|-----------|
| C | -2.900640 | 0.420999  | 0.999766  |
| C | -3.838196 | -0.413584 | 0.406496  |
| C | -1.731185 | 0.785968  | 0.326949  |
| H | -4.726073 | -0.706364 | 0.957494  |
| C | -3.644100 | -0.859386 | -0.899497 |
| C | -1.579650 | 0.355978  | -0.995492 |
| F | -0.512601 | 0.753317  | -1.700954 |
| C | -2.514099 | -0.462018 | -1.608252 |
| H | -2.342013 | -0.771416 | -2.633639 |
| H | -3.039806 | 0.797718  | 2.008361  |
| N | -0.869788 | 1.728173  | 0.945403  |
| N | 0.373012  | 1.586473  | 0.974856  |
| C | 1.049109  | 0.429595  | 0.594681  |
| C | 2.337319  | 0.537021  | 0.071557  |
| C | 0.821263  | -0.975435 | 0.744512  |
| N | 1.881972  | -1.648707 | 0.323108  |
| N | 2.769491  | -0.724510 | -0.103104 |
| C | 4.015650  | -1.157130 | -0.681408 |
| H | 4.056620  | -0.923975 | -1.750089 |
| H | 4.862466  | -0.680714 | -0.179628 |
| H | 4.073298  | -2.235866 | -0.543863 |
| C | 3.106899  | 1.753694  | -0.280401 |
| H | 3.121222  | 1.928138  | -1.362360 |
| H | 2.627136  | 2.612779  | 0.193402  |
| H | 4.144357  | 1.690414  | 0.063161  |
| C | -0.304640 | -1.720111 | 1.375245  |
| H | -0.656373 | -1.213017 | 2.277641  |
| H | -1.161776 | -1.817629 | 0.702162  |
| H | 0.041844  | -2.720005 | 1.644314  |
| H | -4.376694 | -1.503478 | -1.375125 |

30

4pzMeFlB-trans-m ; E = -783.061798528 Hartree

|   |           |           |           |
|---|-----------|-----------|-----------|
| C | -2.760766 | -1.559253 | 0.190117  |
| C | -4.147296 | -1.547412 | 0.201220  |
| C | -2.008400 | -0.387434 | 0.031639  |
| H | -4.698570 | -2.472673 | 0.333184  |
| C | -4.823481 | -0.340835 | 0.037777  |
| C | -2.720119 | 0.814510  | -0.137449 |
| F | -2.085512 | 1.972071  | -0.323260 |
| C | -4.106056 | 0.838327  | -0.135985 |
| H | -4.601800 | 1.793413  | -0.274142 |
| H | -2.201471 | -2.482003 | 0.309214  |
| N | -0.617304 | -0.578589 | 0.037222  |
| N | 0.078835  | 0.476055  | 0.064667  |
| C | 1.438513  | 0.273730  | 0.048449  |
| C | 2.209741  | -0.894537 | -0.045081 |
| C | 2.374238  | 1.341063  | 0.114502  |
| N | 3.611596  | 0.879453  | 0.066878  |
| N | 3.486635  | -0.469785 | -0.028342 |
| C | 4.687474  | -1.264324 | -0.112549 |
| H | 5.524399  | -0.571420 | -0.042488 |
| H | 4.742099  | -1.983356 | 0.709709  |

|   |           |           |           |
|---|-----------|-----------|-----------|
| H | 4.740982  | -1.800647 | -1.064636 |
| C | 1.809939  | -2.319220 | -0.152158 |
| H | 1.283653  | -2.637973 | 0.752676  |
| H | 1.101294  | -2.448960 | -0.974175 |
| H | 2.670982  | -2.973101 | -0.310863 |
| C | 2.079970  | 2.793794  | 0.233313  |
| H | 1.317725  | 3.093389  | -0.490563 |
| H | 1.688406  | 3.033045  | 1.227276  |
| H | 2.989674  | 3.373821  | 0.067839  |
| H | -5.908631 | -0.312572 | 0.040556  |

30

4pzMeF1B-trans-n ; E = -783.064215244 Hartree

|   |           |           |           |
|---|-----------|-----------|-----------|
| C | -2.980525 | 1.394155  | -0.001483 |
| C | -4.353627 | 1.200900  | -0.001937 |
| C | -2.077918 | 0.321821  | -0.000056 |
| H | -5.023342 | 2.054640  | -0.003132 |
| C | -4.863201 | -0.095140 | -0.000777 |
| C | -2.623877 | -0.975269 | 0.001158  |
| F | -1.841919 | -2.057487 | 0.002903  |
| C | -3.994332 | -1.181721 | 0.000826  |
| H | -4.358180 | -2.203835 | 0.001858  |
| H | -2.547669 | 2.389605  | -0.002269 |
| N | -0.725314 | 0.700449  | 0.000290  |
| N | 0.105273  | -0.250609 | -0.000534 |
| C | 1.426110  | 0.126120  | -0.000165 |
| C | 2.442132  | -0.831642 | -0.001065 |
| C | 2.094114  | 1.389749  | 0.000716  |
| N | 3.403283  | 1.207482  | 0.000409  |
| N | 3.592861  | -0.136216 | -0.000809 |
| C | 4.942229  | -0.637305 | 0.000022  |
| H | 5.467976  | -0.294001 | 0.894497  |
| H | 4.921658  | -1.727242 | -0.011288 |
| H | 5.474438  | -0.275535 | -0.883121 |
| C | 2.318782  | -2.310112 | -0.001876 |
| H | 2.780668  | -2.759382 | 0.883948  |
| H | 1.255349  | -2.557911 | -0.002098 |
| H | 2.780637  | -2.758449 | -0.888214 |
| C | 1.513661  | 2.757529  | 0.001801  |
| H | 0.874928  | 2.908820  | -0.873091 |
| H | 0.874785  | 2.907355  | 0.876847  |
| H | 2.317207  | 3.497116  | 0.002521  |
| H | -5.935188 | -0.266049 | -0.001065 |

30

4pzMeF2-cis-m ; E = -882.188736999 Hartree

|   |           |           |           |
|---|-----------|-----------|-----------|
| C | -2.541735 | 0.170533  | -0.675012 |
| C | -3.394266 | 0.683829  | 0.287075  |
| C | -1.432871 | -0.618154 | -0.364758 |
| H | -4.224331 | 1.309305  | -0.020743 |
| C | -3.157247 | 0.371554  | 1.622772  |
| C | -1.242345 | -0.917471 | 0.988059  |
| F | -0.223382 | -1.711756 | 1.330354  |
| C | -2.078155 | -0.431735 | 1.979774  |
| H | -1.877332 | -0.699427 | 3.010892  |
| F | -2.733768 | 0.484966  | -1.961194 |
| N | -0.724080 | -1.271244 | -1.412679 |
| N | 0.524606  | -1.245289 | -1.468682 |
| C | 1.295662  | -0.400590 | -0.673561 |
| C | 1.158042  | 0.960155  | -0.392515 |



|   |           |           |           |
|---|-----------|-----------|-----------|
| C | 2.538464  | -0.784657 | -0.105773 |
| N | 3.101418  | 0.240398  | 0.511782  |
| N | 2.264342  | 1.282346  | 0.314510  |
| C | 2.658811  | 2.591472  | 0.769091  |
| H | 2.983133  | 3.223303  | -0.064875 |
| H | 1.833684  | 3.082342  | 1.291271  |
| H | 3.492243  | 2.452057  | 1.456047  |
| C | 0.155126  | 1.967725  | -0.822108 |
| H | 0.635269  | 2.911226  | -1.099251 |
| H | -0.399712 | 1.604140  | -1.689207 |
| H | -0.575547 | 2.174825  | -0.031140 |
| C | 3.133925  | -2.146059 | -0.096310 |
| H | 2.581491  | -2.807664 | 0.579039  |
| H | 3.086485  | -2.589329 | -1.095228 |
| H | 4.172996  | -2.099436 | 0.234192  |
| H | -3.818507 | 0.756678  | 2.391633  |

30

4pzMeF2-cis-n ; E = -882.189401241 Hartree

|   |           |           |           |
|---|-----------|-----------|-----------|
| C | -2.732279 | -0.488626 | -0.467928 |
| C | -3.622972 | 0.549669  | -0.260390 |
| C | -1.549512 | -0.630506 | 0.261359  |
| H | -4.509285 | 0.617948  | -0.880596 |
| C | -3.347605 | 1.476176  | 0.741809  |
| C | -1.323906 | 0.312012  | 1.269169  |
| F | -0.232728 | 0.185977  | 2.032526  |
| C | -2.195520 | 1.360608  | 1.513536  |
| H | -1.963037 | 2.061108  | 2.307501  |
| F | -2.963567 | -1.368338 | -1.446176 |
| N | -0.785707 | -1.817576 | 0.117034  |
| N | 0.456243  | -1.789125 | -0.026703 |
| C | 1.187672  | -0.634762 | -0.286118 |
| C | 2.504684  | -0.535709 | 0.161752  |
| C | 0.978749  | 0.521580  | -1.101833 |
| N | 2.077750  | 1.261324  | -1.119521 |
| N | 2.972029  | 0.624081  | -0.332922 |
| C | 4.259500  | 1.226752  | -0.099532 |
| H | 4.347177  | 1.584034  | 0.931417  |
| H | 5.062390  | 0.512124  | -0.299287 |
| H | 4.345999  | 2.070027  | -0.783150 |
| C | 3.269297  | -1.457110 | 1.035181  |
| H | 3.351085  | -1.074213 | 2.058821  |
| H | 2.741949  | -2.412650 | 1.073489  |
| H | 4.282847  | -1.625548 | 0.657621  |
| C | -0.175438 | 0.905912  | -1.961875 |
| H | -0.655491 | 0.025663  | -2.398107 |
| H | -0.938848 | 1.449574  | -1.395976 |
| H | 0.179807  | 1.551627  | -2.767578 |
| H | -4.036158 | 2.294648  | 0.922703  |

30

4pzMeF2-trans-m ; E = -882.203494870 Hartree

|   |           |           |           |
|---|-----------|-----------|-----------|
| C | -2.709970 | -1.251482 | -0.081650 |
| C | -4.091564 | -1.189299 | -0.105679 |
| C | -1.885841 | -0.116776 | 0.013539  |
| H | -4.660442 | -2.107794 | -0.190045 |
| C | -4.702973 | 0.056973  | -0.018554 |
| C | -2.553970 | 1.119006  | 0.103809  |
| F | -1.857830 | 2.246210  | 0.227987  |
| C | -3.936628 | 1.212580  | 0.090185  |

|   |           |           |           |
|---|-----------|-----------|-----------|
| H | -4.388637 | 2.194930  | 0.168100  |
| F | -2.122339 | -2.447869 | -0.163865 |
| N | -0.513182 | -0.375120 | 0.049836  |
| N | 0.240897  | 0.631123  | -0.069813 |
| C | 1.589065  | 0.354421  | -0.032598 |
| C | 2.312762  | -0.845318 | 0.053948  |
| C | 2.569844  | 1.382864  | -0.100267 |
| N | 3.787207  | 0.871673  | -0.056131 |
| N | 3.605057  | -0.470450 | 0.036325  |
| C | 4.759881  | -1.330682 | 0.078887  |
| H | 5.634627  | -0.685952 | 0.147649  |
| H | 4.720202  | -1.989670 | 0.950824  |
| H | 4.829920  | -1.942403 | -0.826346 |
| C | 1.890669  | -2.267148 | 0.139126  |
| H | 2.121822  | -2.687170 | 1.125852  |
| H | 0.814140  | -2.333129 | -0.013149 |
| H | 2.406609  | -2.880159 | -0.608341 |
| C | 2.337485  | 2.848268  | -0.198797 |
| H | 1.739569  | 3.088909  | -1.082518 |
| H | 1.783455  | 3.215531  | 0.670142  |
| H | 3.293285  | 3.371789  | -0.258984 |
| H | -5.785448 | 0.129024  | -0.033492 |

30

4pzMeF2-trans-n ; E = -882.205206512 Hartree

|   |           |           |           |
|---|-----------|-----------|-----------|
| C | -2.892762 | 1.048922  | -0.125147 |
| C | -4.252092 | 0.791910  | -0.154822 |
| C | -1.919081 | 0.043902  | 0.008620  |
| H | -4.942630 | 1.619103  | -0.270268 |
| C | -4.684636 | -0.524075 | -0.033007 |
| C | -2.409770 | -1.269727 | 0.132732  |
| F | -1.565305 | -2.287536 | 0.297215  |
| C | -3.765199 | -1.557214 | 0.115098  |
| H | -4.075879 | -2.590466 | 0.221355  |
| F | -2.478545 | 2.310997  | -0.240644 |
| N | -0.593766 | 0.489986  | 0.046516  |
| N | 0.283732  | -0.412952 | -0.061471 |
| C | 1.578495  | 0.041567  | -0.010062 |
| C | 2.657614  | -0.838023 | -0.110594 |
| C | 2.156919  | 1.342648  | 0.123053  |
| N | 3.475279  | 1.252587  | 0.102983  |
| N | 3.757050  | -0.068580 | -0.042618 |
| C | 5.132275  | -0.494734 | -0.045597 |
| H | 5.423641  | -0.907217 | 0.926264  |
| H | 5.293524  | -1.251515 | -0.817226 |
| H | 5.743353  | 0.381038  | -0.260359 |
| C | 2.656516  | -2.313150 | -0.258881 |
| H | 3.171723  | -2.805373 | 0.573261  |
| H | 1.619766  | -2.654413 | -0.278397 |
| H | 3.145911  | -2.628320 | -1.187328 |
| C | 1.478896  | 2.657460  | 0.261768  |
| H | 0.790586  | 2.831047  | -0.569956 |
| H | 0.866544  | 2.684271  | 1.167922  |
| H | 2.225250  | 3.453780  | 0.300158  |
| H | -5.746256 | -0.747279 | -0.051406 |

34

4pzMeOMe1A-cis-m ; E = -798.306503177 Hartree

|   |           |           |           |
|---|-----------|-----------|-----------|
| C | -2.391399 | -0.208933 | -0.124109 |
| C | -3.153075 | 0.534140  | 0.775891  |

|   |           |           |           |
|---|-----------|-----------|-----------|
| C | -1.192972 | -0.811408 | 0.301792  |
| H | -4.072972 | 1.009562  | 0.455588  |
| C | -2.730537 | 0.668783  | 2.097731  |
| C | -0.786829 | -0.665710 | 1.626866  |
| C | -1.550411 | 0.071922  | 2.525797  |
| H | -1.227563 | 0.169105  | 3.557312  |
| N | -0.554009 | -1.729436 | -0.575761 |
| N | 0.676228  | -1.702555 | -0.793403 |
| C | 1.504076  | -0.642028 | -0.408140 |
| C | 1.335981  | 0.742008  | -0.492353 |
| C | 2.855963  | -0.835156 | -0.020190 |
| N | 3.459523  | 0.328056  | 0.166598  |
| N | 2.531686  | 1.262266  | -0.134825 |
| C | 2.913787  | 2.651487  | -0.127857 |
| H | 2.991693  | 3.049547  | -1.145330 |
| H | 2.192804  | 3.248765  | 0.436386  |
| H | 3.889052  | 2.709042  | 0.353234  |
| C | 0.199629  | 1.576513  | -0.956900 |
| H | 0.551647  | 2.471890  | -1.477804 |
| H | -0.429053 | 1.006576  | -1.645119 |
| H | -0.437390 | 1.888710  | -0.120632 |
| C | 3.544816  | -2.132460 | 0.212693  |
| H | 3.254938  | -2.575001 | 1.172033  |
| H | 3.272494  | -2.847601 | -0.568647 |
| H | 4.626717  | -1.987292 | 0.216715  |
| H | -3.335143 | 1.244690  | 2.791675  |
| H | 0.129224  | -1.152164 | 1.946469  |
| O | -2.679618 | -0.361598 | -1.438101 |
| C | -3.900987 | 0.162681  | -1.905264 |
| H | -4.755411 | -0.266958 | -1.367929 |
| H | -3.932838 | 1.256211  | -1.814512 |
| H | -3.963498 | -0.111649 | -2.958632 |

34

4pzMeOMe1A-cis-n ; E = -798.307030260 Hartree

|   |           |           |           |
|---|-----------|-----------|-----------|
| C | 2.538774  | -0.227939 | -0.116983 |
| C | 3.335706  | 0.902945  | 0.047987  |
| C | 1.305241  | -0.121279 | -0.786947 |
| H | 4.280795  | 0.836928  | 0.574399  |
| C | 2.914741  | 2.131119  | -0.461257 |
| C | 0.903263  | 1.112680  | -1.293387 |
| C | 1.702530  | 2.240152  | -1.131958 |
| H | 1.381041  | 3.194784  | -1.535615 |
| N | 0.611350  | -1.314471 | -1.111717 |
| N | -0.614662 | -1.451546 | -0.914265 |
| C | -1.396517 | -0.580717 | -0.145781 |
| C | -2.760125 | -0.471494 | -0.416201 |
| C | -1.198271 | 0.144560  | 1.071355  |
| N | -2.347146 | 0.665154  | 1.478409  |
| N | -3.268433 | 0.305884  | 0.558575  |
| C | -4.625920 | 0.763910  | 0.702375  |
| H | -4.895412 | 1.461126  | -0.097444 |
| H | -5.324187 | -0.077947 | 0.690577  |
| H | -4.689985 | 1.273413  | 1.662756  |
| C | -3.545050 | -1.049538 | -1.533453 |
| H | -3.813276 | -0.296319 | -2.283450 |
| H | -2.934713 | -1.812947 | -2.020917 |
| H | -4.472594 | -1.511017 | -1.179103 |
| C | 0.013782  | 0.289155  | 1.923655  |

|   |           |           |           |
|---|-----------|-----------|-----------|
| H | 0.587389  | -0.641662 | 1.954060  |
| H | 0.679952  | 1.070886  | 1.544759  |
| H | -0.293472 | 0.552824  | 2.937886  |
| H | 3.546317  | 3.004186  | -0.328443 |
| H | -0.040294 | 1.173131  | -1.826121 |
| O | 2.826041  | -1.454000 | 0.376326  |
| C | 4.068718  | -1.626090 | 1.016551  |
| H | 4.904457  | -1.387362 | 0.346869  |
| H | 4.145839  | -1.009063 | 1.921076  |
| H | 4.120812  | -2.678885 | 1.295359  |

34

4pzMeOMe1A-trans-m ; E = -798.325364831 Hartree

|   |           |           |           |
|---|-----------|-----------|-----------|
| C | 2.779610  | 0.516603  | 0.000171  |
| C | 4.120126  | 0.124404  | 0.000148  |
| C | 1.766350  | -0.468439 | -0.000102 |
| H | 4.909762  | 0.866234  | 0.000372  |
| C | 4.451048  | -1.227224 | -0.000155 |
| C | 2.125348  | -1.818876 | -0.000419 |
| C | 3.457328  | -2.203203 | -0.000441 |
| H | 3.722582  | -3.255708 | -0.000697 |
| N | 0.443719  | 0.001839  | -0.000129 |
| N | -0.433580 | -0.903733 | 0.000075  |
| C | -1.740397 | -0.460655 | 0.000042  |
| C | -2.305972 | 0.822402  | -0.000199 |
| C | -2.843500 | -1.357684 | 0.000262  |
| N | -3.987686 | -0.695217 | 0.000164  |
| N | -3.637353 | 0.614640  | -0.000109 |
| C | -4.671448 | 1.616668  | -0.000165 |
| H | -5.624584 | 1.090164  | -0.000590 |
| H | -4.604341 | 2.249435  | 0.890298  |
| H | -4.603789 | 2.249910  | -0.890242 |
| C | -1.706642 | 2.181925  | -0.000489 |
| H | -2.019085 | 2.751844  | 0.882874  |
| H | -0.620624 | 2.091922  | -0.000032 |
| H | -2.018336 | 2.751133  | -0.884585 |
| C | -2.803532 | -2.844622 | 0.000529  |
| H | -2.274547 | -3.222516 | -0.879521 |
| H | -2.274104 | -3.222213 | 0.880433  |
| H | -3.820338 | -3.241660 | 0.000815  |
| H | 5.498415  | -1.514602 | -0.000176 |
| H | 1.320993  | -2.546813 | -0.000653 |
| O | 2.370938  | 1.805193  | 0.000434  |
| C | 3.360033  | 2.806849  | 0.000354  |
| H | 3.994669  | 2.751173  | 0.894094  |
| H | 3.994597  | 2.751114  | -0.893431 |
| H | 2.825425  | 3.757446  | 0.000347  |

34

4pzMeOMe1A-trans-n ; E = -798.326208305 Hartree

|   |           |           |           |
|---|-----------|-----------|-----------|
| C | -2.865808 | 0.346541  | 0.000134  |
| C | -4.155442 | -0.190649 | 0.000157  |
| C | -1.750038 | -0.521608 | -0.000203 |
| H | -5.021240 | 0.460739  | 0.000406  |
| C | -4.336719 | -1.570227 | -0.000170 |
| C | -1.960344 | -1.902931 | -0.000549 |
| C | -3.242143 | -2.431462 | -0.000531 |
| H | -3.390471 | -3.506747 | -0.000825 |
| N | -0.488289 | 0.094162  | -0.000292 |
| N | 0.486515  | -0.707294 | 0.000020  |

|   |           |           |           |
|---|-----------|-----------|-----------|
| C | 1.721142  | -0.097852 | -0.000052 |
| C | 2.908418  | -0.830234 | 0.000077  |
| C | 2.120091  | 1.274623  | -0.000524 |
| N | 3.439711  | 1.361365  | -0.000676 |
| N | 3.896273  | 0.084853  | -0.000464 |
| C | 5.318617  | -0.133433 | 0.000903  |
| H | 5.764808  | 0.310515  | 0.894470  |
| H | 5.519749  | -1.204940 | -0.008293 |
| H | 5.767655  | 0.326419  | -0.882995 |
| C | 3.099631  | -2.301783 | 0.000829  |
| H | 3.645051  | -2.644091 | 0.887088  |
| H | 2.114462  | -2.771465 | 0.000953  |
| H | 3.645134  | -2.645029 | -0.885037 |
| C | 1.270652  | 2.493651  | -0.000944 |
| H | 0.609510  | 2.506185  | -0.872059 |
| H | 0.609329  | 2.506618  | 0.870020  |
| H | 1.905014  | 3.382915  | -0.001118 |
| H | -5.346352 | -1.970570 | -0.000160 |
| H | -1.082577 | -2.540225 | -0.000840 |
| O | -2.600236 | 1.670407  | 0.000417  |
| C | -3.691707 | 2.559129  | 0.001072  |
| H | -4.316921 | 2.435787  | -0.892640 |
| H | -4.316600 | 2.434855  | 0.894877  |
| H | -3.262226 | 3.561578  | 0.001512  |

34

4pzMeOMe1B-cis-m ; E = -798.307178815 Hartree

|   |           |           |           |
|---|-----------|-----------|-----------|
| C | -2.715505 | 0.322438  | -1.236962 |
| C | -3.600422 | 0.812581  | -0.282965 |
| C | -1.598196 | -0.424795 | -0.870970 |
| H | -4.449080 | 1.417241  | -0.585548 |
| C | -3.389995 | 0.508044  | 1.056592  |
| C | -1.426263 | -0.785998 | 0.483150  |
| C | -2.316856 | -0.295608 | 1.438217  |
| H | -2.184577 | -0.548630 | 2.483930  |
| N | -0.783886 | -0.922766 | -1.928585 |
| N | 0.464867  | -0.845044 | -1.909571 |
| C | 1.169424  | -0.133532 | -0.935001 |
| C | 0.993948  | 1.145565  | -0.410494 |
| C | 2.363443  | -0.624609 | -0.348304 |
| N | 2.863783  | 0.257629  | 0.502645  |
| N | 2.033209  | 1.321104  | 0.440967  |
| C | 2.378132  | 2.518260  | 1.163641  |
| H | 2.756974  | 3.297425  | 0.493027  |
| H | 1.512105  | 2.905100  | 1.707110  |
| H | 3.160392  | 2.247932  | 1.871660  |
| C | 0.004795  | 2.214989  | -0.702023 |
| H | 0.470687  | 3.204842  | -0.680048 |
| H | -0.423000 | 2.064847  | -1.694415 |
| H | -0.826814 | 2.205609  | 0.012270  |
| C | 2.971188  | -1.965279 | -0.553226 |
| H | 2.340917  | -2.750907 | -0.122668 |
| H | 3.064005  | -2.182906 | -1.621330 |
| H | 3.956648  | -2.007699 | -0.085677 |
| H | -4.072355 | 0.876263  | 1.816693  |
| O | -0.399102 | -1.616980 | 0.761479  |
| C | -0.069280 | -1.838742 | 2.113270  |
| H | 0.133769  | -0.894799 | 2.633420  |
| H | -0.862841 | -2.383104 | 2.640169  |

|   |           |           |           |
|---|-----------|-----------|-----------|
| H | 0.838202  | -2.442702 | 2.105508  |
| H | -2.854504 | 0.530972  | -2.293675 |

34

4pzMeOMe1B-cis-n ; E = -798.307416181 Hartree

|   |           |           |           |
|---|-----------|-----------|-----------|
| C | 2.881749  | -1.113645 | -0.636718 |
| C | 3.823360  | -0.709401 | 0.302175  |
| C | 1.725134  | -0.371292 | -0.865541 |
| H | 4.701550  | -1.318001 | 0.491190  |
| C | 3.630694  | 0.485493  | 0.985733  |
| C | 1.563522  | 0.869174  | -0.212166 |
| C | 2.514920  | 1.278104  | 0.722436  |
| H | 2.392893  | 2.218289  | 1.247761  |
| N | 0.854763  | -0.834235 | -1.887634 |
| N | -0.385030 | -0.912343 | -1.740596 |
| C | -1.056719 | -0.719148 | -0.533144 |
| C | -2.342906 | -0.185029 | -0.554302 |
| C | -0.817466 | -1.065217 | 0.833929  |
| N | -1.871349 | -0.740374 | 1.571273  |
| N | -2.764863 | -0.185539 | 0.724535  |
| C | -4.023549 | 0.290599  | 1.236019  |
| H | -4.152392 | 1.357794  | 1.030337  |
| H | -4.861456 | -0.259055 | 0.795991  |
| H | -4.011926 | 0.127077  | 2.312651  |
| C | -3.122559 | 0.335081  | -1.702554 |
| H | -3.143334 | 1.431155  | -1.721459 |
| H | -2.644805 | -0.007277 | -2.623013 |
| H | -4.158484 | -0.018806 | -1.684101 |
| C | 0.315684  | -1.791800 | 1.473283  |
| H | 0.660402  | -2.615246 | 0.842454  |
| H | 1.175501  | -1.139260 | 1.651760  |
| H | -0.020448 | -2.196690 | 2.430217  |
| H | 4.357124  | 0.821061  | 1.719555  |
| O | 0.480891  | 1.599722  | -0.562191 |
| C | 0.194648  | 2.756475  | 0.186769  |
| H | 0.064623  | 2.520821  | 1.250375  |
| H | 0.976843  | 3.518075  | 0.075749  |
| H | -0.741695 | 3.148268  | -0.212442 |
| H | 3.004751  | -2.034912 | -1.198059 |

34

4pzMeOMe1B-trans-m ; E = -798.319731027 Hartree

|   |           |           |           |
|---|-----------|-----------|-----------|
| C | 2.407785  | -2.004643 | 0.018154  |
| C | 3.785313  | -2.161708 | 0.018812  |
| C | 1.794672  | -0.746725 | 0.006732  |
| H | 4.226327  | -3.152869 | 0.028386  |
| C | 4.586290  | -1.026181 | 0.006648  |
| C | 2.625140  | 0.407981  | -0.006015 |
| C | 4.013069  | 0.242026  | -0.005951 |
| H | 4.659891  | 1.111071  | -0.015704 |
| N | 0.393480  | -0.815231 | 0.007689  |
| N | -0.232122 | 0.280286  | 0.009113  |
| C | -1.609384 | 0.184731  | 0.007073  |
| C | -2.506210 | -0.892137 | -0.006585 |
| C | -2.425222 | 1.349344  | 0.017065  |
| N | -3.707634 | 1.028253  | 0.010392  |
| N | -3.730380 | -0.327330 | -0.003491 |
| C | -4.999602 | -1.006968 | -0.018970 |
| H | -5.771464 | -0.239282 | 0.005908  |
| H | -5.113036 | -1.608188 | -0.926650 |

|   |           |           |           |
|---|-----------|-----------|-----------|
| H | -5.105761 | -1.659428 | 0.853270  |
| C | -2.306446 | -2.363876 | -0.023605 |
| H | -2.775710 | -2.819945 | -0.903430 |
| H | -1.237964 | -2.572432 | -0.042227 |
| H | -2.744425 | -2.835592 | 0.864253  |
| C | -1.969249 | 2.764905  | 0.034875  |
| H | -1.380912 | 2.972923  | 0.933694  |
| H | -1.323862 | 2.975332  | -0.822977 |
| H | -2.831312 | 3.434114  | 0.009495  |
| H | 5.668575  | -1.116566 | 0.006588  |
| O | 2.033507  | 1.617212  | -0.018681 |
| C | 2.854407  | 2.761191  | -0.034535 |
| H | 3.490969  | 2.817793  | 0.857661  |
| H | 3.487638  | 2.795554  | -0.930242 |
| H | 2.173448  | 3.612946  | -0.043736 |
| H | 1.742750  | -2.862622 | 0.027056  |

34

4pzMeOMe1B-trans-n ; E = -798.321884117 Hartree

|   |           |           |           |
|---|-----------|-----------|-----------|
| C | 2.653475  | -1.818791 | 0.003945  |
| C | 4.039814  | -1.799378 | 0.005304  |
| C | 1.885220  | -0.649021 | 0.001397  |
| H | 4.603373  | -2.726412 | 0.007275  |
| C | 4.689525  | -0.571172 | 0.004075  |
| C | 2.561616  | 0.601616  | 0.000142  |
| C | 3.959179  | 0.613874  | 0.001529  |
| H | 4.491021  | 1.557698  | 0.000618  |
| N | 0.505390  | -0.902737 | 0.000353  |
| N | -0.261926 | 0.099119  | -0.001873 |
| C | -1.605492 | -0.206656 | -0.001999 |
| C | -2.568215 | 0.801769  | -0.005230 |
| C | -2.341254 | -1.431725 | -0.003110 |
| N | -3.640120 | -1.180171 | -0.006553 |
| N | -3.756966 | 0.171448  | -0.011770 |
| C | -5.067566 | 0.764952  | 0.021356  |
| H | -5.277722 | 1.213050  | 0.998421  |
| H | -5.161793 | 1.534338  | -0.750070 |
| H | -5.785706 | -0.031254 | -0.170101 |
| C | -2.385072 | 2.272995  | -0.002285 |
| H | -2.834265 | 2.738143  | 0.882431  |
| H | -1.312753 | 2.478754  | -0.000833 |
| H | -2.831416 | 2.740988  | -0.887139 |
| C | -1.838377 | -2.830539 | -0.005044 |
| H | -1.208474 | -3.016320 | -0.879662 |
| H | -1.210417 | -3.019228 | 0.870307  |
| H | -2.682818 | -3.523417 | -0.007196 |
| H | 5.774495  | -0.522543 | 0.005082  |
| O | 1.821775  | 1.729155  | -0.002356 |
| C | 2.496686  | 2.964879  | -0.003921 |
| H | 3.120448  | 3.089706  | 0.890386  |
| H | 3.122207  | 3.086472  | -0.897442 |
| H | 1.718107  | 3.728733  | -0.006069 |
| H | 2.099637  | -2.752384 | 0.004801  |

38

4pzMeOMe2-cis-m ; E = -912.710258974 Hartree

|   |          |           |           |
|---|----------|-----------|-----------|
| C | 2.437917 | -0.111961 | -0.239164 |
| C | 3.134341 | 0.312706  | 0.893008  |
| C | 1.203535 | 0.461165  | -0.581779 |
| H | 4.076662 | -0.143076 | 1.170705  |

|   |           |           |           |
|---|-----------|-----------|-----------|
| C | 2.597979  | 1.333232  | 1.669903  |
| C | 0.695202  | 1.510275  | 0.204786  |
| C | 1.389553  | 1.934750  | 1.340181  |
| H | 1.000614  | 2.736771  | 1.955281  |
| N | 0.636442  | 0.113888  | -1.842272 |
| N | -0.555901 | -0.243830 | -1.952850 |
| C | -1.361257 | -0.522741 | -0.845348 |
| C | -1.121037 | -1.293025 | 0.290143  |
| C | -2.721126 | -0.131252 | -0.759639 |
| N | -3.268419 | -0.585134 | 0.357371  |
| N | -2.293834 | -1.292894 | 0.968622  |
| C | -2.608311 | -2.027739 | 2.165976  |
| H | -2.698357 | -3.101494 | 1.966962  |
| H | -1.840834 | -1.869688 | 2.928323  |
| H | -3.564107 | -1.652302 | 2.529163  |
| C | 0.060814  | -2.080687 | 0.723291  |
| H | -0.237060 | -3.049612 | 1.136820  |
| H | 0.722856  | -2.259837 | -0.126584 |
| H | 0.646045  | -1.546590 | 1.481546  |
| C | -3.465280 | 0.728241  | -1.717069 |
| H | -3.067625 | 1.748591  | -1.718791 |
| H | -3.359311 | 0.345279  | -2.736520 |
| H | -4.523087 | 0.761007  | -1.449580 |
| H | 3.135021  | 1.669065  | 2.551649  |
| O | -0.459772 | 2.064369  | -0.224945 |
| C | -1.072373 | 3.035816  | 0.590221  |
| H | -1.295365 | 2.638418  | 1.587803  |
| H | -0.450359 | 3.934399  | 0.686816  |
| H | -2.007113 | 3.297599  | 0.093834  |
| O | 2.833132  | -1.127301 | -1.043988 |
| C | 4.093701  | -1.705374 | -0.796964 |
| H | 4.896355  | -0.959611 | -0.848698 |
| H | 4.126560  | -2.201166 | 0.181870  |
| H | 4.242256  | -2.448945 | -1.580505 |

38

4pzMeOMe2-cis-n ; E = -912.709808065 Hartree

|   |           |           |           |
|---|-----------|-----------|-----------|
| C | 2.582856  | -0.277796 | -0.189697 |
| C | 3.346970  | 0.480296  | 0.697520  |
| C | 1.332573  | 0.181349  | -0.634608 |
| H | 4.299983  | 0.117529  | 1.061980  |
| C | 2.861749  | 1.711666  | 1.123636  |
| C | 0.877347  | 1.442280  | -0.212169 |
| C | 1.639148  | 2.200647  | 0.680293  |
| H | 1.290429  | 3.168023  | 1.019928  |
| N | 0.689101  | -0.548557 | -1.669062 |
| N | -0.511036 | -0.889546 | -1.596828 |
| C | -1.285731 | -0.781155 | -0.440757 |
| C | -2.652181 | -0.538036 | -0.547353 |
| C | -1.053162 | -1.014924 | 0.949182  |
| N | -2.190698 | -0.901150 | 1.622672  |
| N | -3.134498 | -0.587307 | 0.709673  |
| C | -4.488325 | -0.359427 | 1.141965  |
| H | -4.796208 | 0.673664  | 0.950530  |
| H | -5.181537 | -1.035812 | 0.632908  |
| H | -4.517016 | -0.552879 | 2.213338  |
| C | -3.459163 | -0.238505 | -1.754114 |
| H | -3.718655 | 0.824728  | -1.821086 |
| H | -2.865936 | -0.495737 | -2.634239 |



|   |           |           |           |
|---|-----------|-----------|-----------|
| H | -4.391958 | -0.811624 | -1.773069 |
| C | 0.181492  | -1.444052 | 1.663524  |
| H | 0.783233  | -2.111939 | 1.041035  |
| H | 0.812479  | -0.588989 | 1.926967  |
| H | -0.098421 | -1.965175 | 2.581788  |
| H | 3.450319  | 2.304224  | 1.817229  |
| O | -0.298806 | 1.852887  | -0.739901 |
| C | -0.835325 | 3.071530  | -0.285998 |
| H | -1.015765 | 3.053020  | 0.796096  |
| H | -0.182567 | 3.919430  | -0.529220 |
| H | -1.785883 | 3.193205  | -0.807000 |
| O | 2.923325  | -1.510010 | -0.632316 |
| C | 4.186516  | -2.011471 | -0.263266 |
| H | 4.996787  | -1.351664 | -0.597582 |
| H | 4.263448  | -2.153296 | 0.822405  |
| H | 4.282445  | -2.978219 | -0.758407 |

38

4pzMeOMe2-trans-m ; E = -912.720681427 Hartree

|   |           |           |           |
|---|-----------|-----------|-----------|
| C | -2.410458 | -1.223497 | -0.099919 |
| C | -3.801750 | -1.138858 | -0.129733 |
| C | -1.607427 | -0.061987 | -0.003211 |
| H | -4.412961 | -2.027521 | -0.220938 |
| C | -4.402844 | 0.110314  | -0.042085 |
| C | -2.252732 | 1.195806  | 0.090094  |
| C | -3.649028 | 1.269558  | 0.074349  |
| H | -4.148470 | 2.227242  | 0.148225  |
| N | -0.236330 | -0.310276 | 0.090047  |
| N | 0.538334  | 0.634314  | -0.225057 |
| C | 1.882536  | 0.333207  | -0.108516 |
| C | 2.566553  | -0.859654 | 0.158894  |
| C | 2.893948  | 1.311765  | -0.301107 |
| N | 4.096954  | 0.779870  | -0.160797 |
| N | 3.873332  | -0.528601 | 0.115016  |
| C | 5.000090  | -1.408830 | 0.283959  |
| H | 5.891001  | -0.783337 | 0.316331  |
| H | 4.914464  | -1.973043 | 1.216928  |
| H | 5.083562  | -2.113244 | -0.550553 |
| C | 2.091896  | -2.242742 | 0.420830  |
| H | 2.195523  | -2.500325 | 1.482431  |
| H | 1.033259  | -2.310016 | 0.168252  |
| H | 2.663953  | -2.977912 | -0.155963 |
| C | 2.703696  | 2.756468  | -0.599598 |
| H | 2.030139  | 2.889237  | -1.450682 |
| H | 2.249004  | 3.275048  | 0.250675  |
| H | 3.666099  | 3.221807  | -0.821088 |
| H | -5.486131 | 0.182015  | -0.064607 |
| O | -1.465924 | 2.280100  | 0.229873  |
| C | -2.082801 | 3.523952  | 0.461284  |
| H | -2.694741 | 3.838955  | -0.393440 |
| H | -2.707298 | 3.508274  | 1.363659  |
| H | -1.268864 | 4.236894  | 0.597868  |
| O | -1.734542 | -2.392810 | -0.181280 |
| C | -2.485020 | -3.581788 | -0.243353 |
| H | -3.127651 | -3.703758 | 0.637854  |
| H | -3.105345 | -3.623891 | -1.147746 |
| H | -1.757802 | -4.394181 | -0.271736 |

38

4pzMeOMe2-trans-n ; E = -912.722044178 Hartree

|   |           |           |           |
|---|-----------|-----------|-----------|
| C | 2.606426  | -0.984225 | -0.152405 |
| C | 3.967134  | -0.684085 | -0.210333 |
| C | 1.636707  | 0.037749  | -0.014087 |
| H | 4.705380  | -1.466106 | -0.333373 |
| C | 4.370294  | 0.641002  | -0.109044 |
| C | 2.082382  | 1.377685  | 0.092745  |
| C | 3.449498  | 1.667396  | 0.048669  |
| H | 3.797331  | 2.689204  | 0.132255  |
| N | 0.322349  | -0.420905 | 0.106502  |
| N | -0.591480 | 0.394013  | -0.198658 |
| C | -1.865330 | -0.110217 | -0.035874 |
| C | -2.992164 | 0.664902  | -0.300078 |
| C | -2.366822 | -1.387458 | 0.361333  |
| N | -3.689970 | -1.381894 | 0.337397  |
| N | -4.048329 | -0.136869 | -0.065735 |
| C | -5.444331 | 0.201903  | -0.144181 |
| H | -5.749682 | 0.838155  | 0.693784  |
| H | -5.661057 | 0.721331  | -1.081595 |
| H | -6.005310 | -0.731146 | -0.107713 |
| C | -3.077709 | 2.077368  | -0.743276 |
| H | -3.611704 | 2.701328  | -0.017625 |
| H | -2.060621 | 2.459447  | -0.851619 |
| H | -3.592379 | 2.172824  | -1.706222 |
| C | -1.611237 | -2.607637 | 0.748172  |
| H | -0.889629 | -2.879215 | -0.026978 |
| H | -1.021335 | -2.428077 | 1.651982  |
| H | -2.307241 | -3.431524 | 0.922461  |
| H | 5.428622  | 0.880121  | -0.153455 |
| O | 1.141681  | 2.327512  | 0.275972  |
| C | 1.571265  | 3.639072  | 0.552091  |
| H | 2.214664  | 3.679512  | 1.440238  |
| H | 2.106705  | 4.079561  | -0.298670 |
| H | 0.664302  | 4.215904  | 0.737898  |
| O | 2.116285  | -2.240035 | -0.242793 |
| C | 3.037436  | -3.299943 | -0.334634 |
| H | 3.637174  | -3.239271 | -1.251939 |
| H | 3.710396  | -3.330341 | 0.531793  |
| H | 2.441383  | -4.213005 | -0.357788 |

42

4pzMePyr1A-cis-m ; E = -895.077124832 Hartree

|   |           |           |           |
|---|-----------|-----------|-----------|
| C | -3.023194 | -0.385740 | 1.187924  |
| C | -3.919369 | -0.493480 | 0.135698  |
| C | -1.737604 | 0.132412  | 1.006605  |
| H | -4.898228 | -0.935581 | 0.289059  |
| C | -3.531895 | -0.032954 | -1.121839 |
| C | -1.389359 | 0.728769  | -0.235037 |
| C | -2.297321 | 0.575171  | -1.301570 |
| H | -2.038811 | 0.969438  | -2.277823 |
| N | -0.911583 | 0.063921  | 2.162313  |
| N | 0.282526  | -0.329870 | 2.128181  |
| C | 0.901743  | -0.865002 | 0.995377  |
| C | 0.477225  | -1.785454 | 0.032260  |
| C | 2.276445  | -0.638715 | 0.714218  |
| N | 2.653719  | -1.309567 | -0.363874 |
| N | 1.559526  | -1.999952 | -0.749686 |
| C | 1.675433  | -2.928570 | -1.845365 |
| H | 1.676129  | -3.965579 | -1.492600 |
| H | 0.855795  | -2.793482 | -2.555750 |

|   |           |           |           |
|---|-----------|-----------|-----------|
| H | 2.623648  | -2.719603 | -2.338531 |
| C | -0.788477 | -2.544318 | -0.139160 |
| H | -0.596152 | -3.548516 | -0.528489 |
| H | -1.295491 | -2.644996 | 0.820980  |
| H | -1.480801 | -2.033198 | -0.817264 |
| C | 3.221954  | 0.232714  | 1.464003  |
| H | 3.214250  | 1.264085  | 1.093037  |
| H | 2.941210  | 0.260430  | 2.520190  |
| H | 4.240658  | -0.148410 | 1.365260  |
| H | -4.208677 | -0.115564 | -1.967439 |
| C | 1.196255  | 3.292262  | -0.130537 |
| C | 0.349041  | 2.281182  | 0.642019  |
| N | -0.219626 | 1.429950  | -0.400580 |
| C | 0.255188  | 1.812440  | -1.717779 |
| C | 1.555429  | 2.539123  | -1.410156 |
| H | 0.602017  | 4.179380  | -0.376993 |
| H | -0.447823 | 2.746742  | 1.234493  |
| H | 0.391823  | 0.926125  | -2.347585 |
| H | 2.346286  | 1.805685  | -1.219294 |
| H | -0.449654 | 2.489210  | -2.230940 |
| H | 1.876014  | 3.192649  | -2.225208 |
| H | 2.067813  | 3.622063  | 0.441009  |
| H | 0.966597  | 1.706406  | 1.340526  |
| H | -3.267493 | -0.757706 | 2.178908  |

42

4pzMePyr1A-cis-n ; E = -895.077080682 Hartree

|   |           |           |           |
|---|-----------|-----------|-----------|
| C | -3.143966 | -0.778193 | 0.977660  |
| C | -4.026806 | -0.703564 | -0.088083 |
| C | -1.876122 | -0.192423 | 0.919176  |
| H | -4.989674 | -1.201330 | -0.041278 |
| C | -3.646313 | 0.010667  | -1.223421 |
| C | -1.536343 | 0.643902  | -0.176574 |
| C | -2.431840 | 0.680801  | -1.262348 |
| H | -2.177390 | 1.262664  | -2.140801 |
| N | -1.056954 | -0.446161 | 2.050472  |
| N | 0.148846  | -0.788325 | 1.953538  |
| C | 0.790441  | -1.093393 | 0.749791  |
| C | 2.143724  | -0.796684 | 0.595934  |
| C | 0.435497  | -1.831096 | -0.423413 |
| N | 1.484803  | -1.932252 | -1.228052 |
| N | 2.494126  | -1.280538 | -0.612576 |
| C | 3.769894  | -1.171826 | -1.269710 |
| H | 3.994071  | -0.132481 | -1.532639 |
| H | 4.572206  | -1.557571 | -0.633938 |
| H | 3.711385  | -1.769139 | -2.178527 |
| C | 3.068795  | -0.093813 | 1.518122  |
| H | 3.270326  | 0.937567  | 1.203504  |
| H | 2.608953  | -0.062363 | 2.508658  |
| H | 4.031080  | -0.610815 | 1.593462  |
| C | -0.817603 | -2.559548 | -0.766057 |
| H | -1.226888 | -3.064647 | 0.112713  |
| H | -1.593148 | -1.889223 | -1.146004 |
| H | -0.594184 | -3.306399 | -1.530902 |
| H | -4.312637 | 0.074086  | -2.078779 |
| C | 0.940297  | 3.236516  | 0.444507  |
| C | 0.137658  | 2.062164  | 1.003618  |
| N | -0.382268 | 1.394757  | -0.186592 |
| C | 0.099824  | 2.020431  | -1.403881 |

|   |           |           |           |
|---|-----------|-----------|-----------|
| C | 1.356077  | 2.742215  | -0.939553 |
| H | 0.302054  | 4.121412  | 0.342890  |
| H | -0.682668 | 2.373503  | 1.661182  |
| H | 0.288895  | 1.262868  | -2.172721 |
| H | 2.183323  | 2.027591  | -0.858723 |
| H | -0.622970 | 2.747917  | -1.811857 |
| H | 1.658163  | 3.543702  | -1.618231 |
| H | 1.783993  | 3.504791  | 1.085926  |
| H | 0.778500  | 1.395554  | 1.592289  |
| H | -3.382557 | -1.346979 | 1.871638  |

42

4pzMePyrlA-trans-m ; E = -895.088860267 Hartree

|   |           |           |           |
|---|-----------|-----------|-----------|
| C | 1.693101  | -2.763648 | -0.034912 |
| C | 2.962535  | -3.198004 | 0.299470  |
| C | 1.342997  | -1.405847 | -0.045482 |
| H | 3.195698  | -4.256861 | 0.333026  |
| C | 3.921986  | -2.239648 | 0.624320  |
| C | 2.359712  | -0.419156 | 0.143734  |
| C | 3.630916  | -0.888101 | 0.542632  |
| H | 4.414912  | -0.173763 | 0.762555  |
| N | -0.040105 | -1.213335 | -0.178984 |
| N | -0.514923 | -0.185905 | 0.381077  |
| C | -1.889029 | -0.032966 | 0.289503  |
| C | -2.902342 | -0.786908 | -0.314384 |
| C | -2.552793 | 1.069394  | 0.892659  |
| N | -3.858156 | 1.005934  | 0.685855  |
| N | -4.044125 | -0.119641 | -0.042522 |
| C | -5.378200 | -0.484585 | -0.442419 |
| H | -5.477814 | -0.483152 | -1.532647 |
| H | -5.642762 | -1.476916 | -0.064440 |
| H | -6.051786 | 0.257695  | -0.016865 |
| C | -2.882746 | -2.046945 | -1.101129 |
| H | -3.375876 | -1.920249 | -2.072018 |
| H | -1.847826 | -2.346848 | -1.258849 |
| H | -3.402094 | -2.855087 | -0.571670 |
| C | -1.935045 | 2.185983  | 1.657886  |
| H | -1.246629 | 1.803738  | 2.416112  |
| H | -1.354331 | 2.842204  | 0.999557  |
| H | -2.712504 | 2.781957  | 2.139720  |
| H | 4.921973  | -2.544715 | 0.919724  |
| C | 1.838040  | 2.744692  | -1.531826 |
| C | 1.203212  | 1.448582  | -1.037702 |
| N | 2.170953  | 0.918948  | -0.084979 |
| C | 3.233286  | 1.878812  | 0.171907  |
| C | 2.650894  | 3.195332  | -0.322153 |
| H | 2.506957  | 2.545975  | -2.377253 |
| H | 1.015845  | 0.724724  | -1.839615 |
| H | 3.497397  | 1.894444  | 1.235580  |
| H | 1.990568  | 3.623829  | 0.440005  |
| H | 4.145482  | 1.628771  | -0.395705 |
| H | 3.423867  | 3.930633  | -0.558655 |
| H | 1.091439  | 3.474396  | -1.855359 |
| H | 0.242117  | 1.632196  | -0.541895 |
| H | 0.890710  | -3.466896 | -0.237062 |

42

4pzMePyrlA-trans-n ; E = -895.090304196 Hartree

|   |           |           |           |
|---|-----------|-----------|-----------|
| C | -2.035689 | -2.621733 | -0.038764 |
| C | -3.329323 | -2.878979 | -0.456222 |

|   |           |           |           |
|---|-----------|-----------|-----------|
| C | -1.510843 | -1.323495 | 0.014034  |
| H | -3.699011 | -3.896763 | -0.520826 |
| C | -4.131063 | -1.798613 | -0.820532 |
| C | -2.372258 | -0.208547 | -0.219803 |
| C | -3.668172 | -0.498150 | -0.698331 |
| H | -4.335617 | 0.316549  | -0.951754 |
| N | -0.124924 | -1.316838 | 0.240616  |
| N | 0.515525  | -0.370470 | -0.296933 |
| C | 1.884049  | -0.414909 | -0.105124 |
| C | 2.723175  | 0.541961  | -0.671986 |
| C | 2.746402  | -1.295214 | 0.615849  |
| N | 4.003964  | -0.899460 | 0.493023  |
| N | 3.969789  | 0.210161  | -0.283370 |
| C | 5.203416  | 0.860088  | -0.639062 |
| H | 5.452393  | 0.694318  | -1.692750 |
| H | 5.140198  | 1.936174  | -0.454214 |
| H | 5.984799  | 0.429686  | -0.014125 |
| C | 2.385122  | 1.703949  | -1.529688 |
| H | 2.888524  | 1.654223  | -2.501654 |
| H | 1.306279  | 1.702492  | -1.698716 |
| H | 2.664783  | 2.654167  | -1.059816 |
| C | 2.403170  | -2.496368 | 1.421873  |
| H | 1.690231  | -2.245640 | 2.212485  |
| H | 1.917153  | -3.255572 | 0.802598  |
| H | 3.311337  | -2.911923 | 1.864270  |
| H | -5.143024 | -1.964488 | -1.179345 |
| C | -1.548395 | 2.821143  | 1.569979  |
| C | -1.054767 | 1.465296  | 1.073913  |
| N | -2.015200 | 1.091451  | 0.040772  |
| C | -2.934410 | 2.183727  | -0.237228 |
| C | -2.222051 | 3.402567  | 0.330926  |
| H | -2.288343 | 2.690068  | 2.367992  |
| H | -1.020096 | 0.704128  | 1.862202  |
| H | -3.136330 | 2.261715  | -1.311809 |
| H | -1.468098 | 3.762736  | -0.378065 |
| H | -3.900760 | 2.035934  | 0.274141  |
| H | -2.909161 | 4.224432  | 0.546742  |
| H | -0.737059 | 3.440619  | 1.960679  |
| H | -0.045009 | 1.533014  | 0.651436  |
| H | -1.347446 | -3.426130 | 0.202757  |

42

4pzMePyr1B-cis-m ; E = -895.075168267 Hartree

|   |           |           |           |
|---|-----------|-----------|-----------|
| C | 1.805844  | 0.762185  | -0.350033 |
| C | 2.143958  | 2.101401  | -0.050625 |
| C | 0.532047  | 0.540136  | -0.941075 |
| H | 3.090343  | 2.315701  | 0.430144  |
| C | 1.299730  | 3.156373  | -0.357170 |
| C | -0.295729 | 1.622880  | -1.253513 |
| C | 0.071594  | 2.929069  | -0.974663 |
| H | -0.580527 | 3.752910  | -1.244642 |
| N | 0.183710  | -0.755040 | -1.405012 |
| N | -0.958888 | -1.246283 | -1.247633 |
| C | -1.937042 | -0.711119 | -0.399656 |
| C | -1.877315 | -0.157188 | 0.883466  |
| C | -3.321209 | -0.874095 | -0.671681 |
| N | -4.055871 | -0.422823 | 0.332843  |
| N | -3.167659 | -0.007676 | 1.261304  |
| C | -3.661102 | 0.470725  | 2.527846  |

|   |           |           |           |
|---|-----------|-----------|-----------|
| H | -3.432208 | -0.231073 | 3.336948  |
| H | -3.233969 | 1.447784  | 2.769246  |
| H | -4.741776 | 0.561673  | 2.429528  |
| C | -0.739569 | 0.173953  | 1.779167  |
| H | -1.030310 | 0.109769  | 2.831431  |
| H | 0.090128  | -0.517671 | 1.617620  |
| H | -0.355668 | 1.181757  | 1.581096  |
| C | -3.928505 | -1.426261 | -1.911813 |
| H | -3.906182 | -0.696908 | -2.728981 |
| H | -3.365859 | -2.302424 | -2.246139 |
| H | -4.968560 | -1.703541 | -1.729764 |
| H | 1.613442  | 4.168247  | -0.117174 |
| C | 3.561686  | -2.286820 | 0.687188  |
| C | 2.486431  | -1.677832 | -0.203171 |
| N | 2.673036  | -0.242409 | -0.008334 |
| C | 3.996298  | 0.057245  | 0.521271  |
| C | 4.709129  | -1.292503 | 0.545392  |
| H | 3.213595  | -2.318923 | 1.726117  |
| H | 2.625424  | -1.964790 | -1.252922 |
| H | 4.521873  | 0.786303  | -0.108982 |
| H | 5.449698  | -1.356441 | 1.346405  |
| H | 1.477476  | -1.985703 | 0.077016  |
| H | 3.825835  | -3.303303 | 0.385289  |
| H | 5.227585  | -1.456502 | -0.405604 |
| H | 3.921983  | 0.490834  | 1.530723  |
| H | -1.240095 | 1.413023  | -1.745119 |

42

4pzMePyr1B-cis-n ; E = -895.076317642 Hartree

|   |           |           |           |
|---|-----------|-----------|-----------|
| C | 1.964644  | 0.765167  | -0.273478 |
| C | 2.409394  | 2.045058  | 0.124657  |
| C | 0.642571  | 0.675486  | -0.788136 |
| H | 3.401056  | 2.156454  | 0.545546  |
| C | 1.611503  | 3.170197  | -0.009407 |
| C | -0.138743 | 1.827312  | -0.923437 |
| C | 0.328495  | 3.075055  | -0.544113 |
| H | -0.289744 | 3.956816  | -0.674666 |
| N | 0.202064  | -0.534368 | -1.377213 |
| N | -0.959905 | -0.979314 | -1.227225 |
| C | -1.875744 | -0.514828 | -0.273166 |
| C | -3.240293 | -0.675050 | -0.509375 |
| C | -1.784809 | -0.071756 | 1.085828  |
| N | -2.998966 | 0.042949  | 1.605794  |
| N | -3.861403 | -0.297493 | 0.625181  |
| C | -5.277514 | -0.252918 | 0.880132  |
| H | -5.778336 | 0.437260  | 0.194224  |
| H | -5.728072 | -1.245165 | 0.777557  |
| H | -5.405557 | 0.096562  | 1.903588  |
| C | -3.931991 | -1.143825 | -1.734246 |
| H | -4.411312 | -0.321985 | -2.279130 |
| H | -3.188748 | -1.599686 | -2.392158 |
| H | -4.704315 | -1.885222 | -1.504175 |
| C | -0.600104 | 0.176631  | 1.953586  |
| H | 0.149807  | -0.612159 | 1.842504  |
| H | -0.110267 | 1.123701  | 1.706873  |
| H | -0.925821 | 0.206141  | 2.995588  |
| H | 2.003674  | 4.133573  | 0.303650  |
| C | 3.514039  | -2.451244 | 0.517237  |
| C | 2.426915  | -1.725166 | -0.267042 |

|   |           |           |           |
|---|-----------|-----------|-----------|
| N | 2.787962  | -0.317280 | -0.116090 |
| C | 4.151707  | -0.161186 | 0.365494  |
| C | 4.735611  | -1.567591 | 0.286873  |
| H | 3.259210  | -2.470603 | 1.583185  |
| H | 2.422643  | -2.027592 | -1.320449 |
| H | 4.709235  | 0.556972  | -0.248926 |
| H | 5.537250  | -1.725557 | 1.012571  |
| H | 1.424825  | -1.915840 | 0.124102  |
| H | 3.650999  | -3.482332 | 0.181910  |
| H | 5.144378  | -1.747021 | -0.713668 |
| H | 4.162641  | 0.214156  | 1.401647  |
| H | -1.125897 | 1.722022  | -1.361329 |

42

4pzMePyrlB-trans-m ; E = -895.094123380 Hartree

|   |           |           |           |
|---|-----------|-----------|-----------|
| C | -2.448178 | -0.489670 | -0.150136 |
| C | -3.631466 | -1.237765 | -0.348815 |
| C | -1.219858 | -1.211088 | -0.153862 |
| H | -4.586919 | -0.728841 | -0.373973 |
| C | -3.606538 | -2.612989 | -0.495283 |
| C | -1.227762 | -2.606880 | -0.288807 |
| C | -2.400851 | -3.316519 | -0.453608 |
| H | -2.382306 | -4.394610 | -0.575846 |
| N | -0.021073 | -0.484053 | -0.115939 |
| N | 1.004705  | -1.167598 | 0.162928  |
| C | 2.207576  | -0.495944 | 0.085082  |
| C | 2.570297  | 0.714457  | -0.517247 |
| C | 3.413166  | -1.021757 | 0.623968  |
| N | 4.427559  | -0.205281 | 0.390820  |
| N | 3.897520  | 0.832064  | -0.299300 |
| C | 4.772545  | 1.875358  | -0.768209 |
| H | 4.906936  | 1.826447  | -1.854208 |
| H | 4.379222  | 2.860209  | -0.501775 |
| H | 5.735337  | 1.724465  | -0.282099 |
| C | 1.786409  | 1.699681  | -1.302212 |
| H | 2.369944  | 2.112824  | -2.131123 |
| H | 0.889920  | 1.214852  | -1.691387 |
| H | 1.451858  | 2.537579  | -0.677558 |
| C | 3.586320  | -2.290693 | 1.380241  |
| H | 3.123885  | -2.227551 | 2.370671  |
| H | 3.105688  | -3.120659 | 0.854899  |
| H | 4.648809  | -2.507489 | 1.505931  |
| H | -4.543213 | -3.142947 | -0.644495 |
| C | -2.315688 | 2.868381  | 1.245994  |
| C | -1.515057 | 1.707741  | 0.663798  |
| N | -2.531616 | 0.865957  | 0.035025  |
| C | -3.813978 | 1.551097  | -0.036366 |
| C | -3.468909 | 3.004939  | 0.257614  |
| H | -2.701852 | 2.601970  | 2.236576  |
| H | -0.785404 | 2.061855  | -0.072564 |
| H | -4.279206 | 1.414356  | -1.019930 |
| H | -4.322681 | 3.563485  | 0.649128  |
| H | -0.957259 | 1.144692  | 1.417017  |
| H | -1.716871 | 3.777053  | 1.349691  |
| H | -3.126552 | 3.502768  | -0.656606 |
| H | -4.515931 | 1.161377  | 0.719249  |
| H | -0.261240 | -3.099558 | -0.289245 |

42

4pzMePyrlB-trans-n ; E = -895.095381617 Hartree

|   |           |           |           |
|---|-----------|-----------|-----------|
| C | -2.467063 | 0.634752  | 0.085312  |
| C | -3.556728 | 1.533275  | 0.172619  |
| C | -1.159145 | 1.199394  | 0.134088  |
| H | -4.567773 | 1.146389  | 0.151487  |
| C | -3.370958 | 2.899954  | 0.268276  |
| C | -1.005048 | 2.591019  | 0.220101  |
| C | -2.086476 | 3.447143  | 0.283838  |
| H | -1.939206 | 4.518708  | 0.371628  |
| N | -0.048310 | 0.340790  | 0.192268  |
| N | 1.050936  | 0.896193  | -0.088882 |
| C | 2.181290  | 0.122334  | 0.068377  |
| C | 3.425583  | 0.578289  | -0.368634 |
| C | 2.440183  | -1.145429 | 0.673881  |
| N | 3.731721  | -1.429377 | 0.603935  |
| N | 4.306731  | -0.383139 | -0.034215 |
| C | 5.724603  | -0.398524 | -0.280828 |
| H | 5.938694  | -0.412115 | -1.354375 |
| H | 6.209226  | 0.474655  | 0.166610  |
| H | 6.117864  | -1.304885 | 0.177343  |
| C | 3.781134  | 1.838227  | -1.064567 |
| H | 4.174185  | 1.652406  | -2.070723 |
| H | 2.879880  | 2.447246  | -1.154033 |
| H | 4.537157  | 2.408460  | -0.513086 |
| C | 1.502275  | -2.082590 | 1.345456  |
| H | 0.816919  | -1.542027 | 2.003209  |
| H | 0.885025  | -2.614157 | 0.613784  |
| H | 2.068709  | -2.818195 | 1.920870  |
| H | -4.241905 | 3.546187  | 0.334153  |
| C | -2.663297 | -2.817283 | -1.068106 |
| C | -1.771106 | -1.718494 | -0.500923 |
| N | -2.718516 | -0.703858 | -0.049615 |
| C | -4.079059 | -1.220315 | -0.025408 |
| C | -3.903430 | -2.725278 | -0.185463 |
| H | -2.925506 | -2.591804 | -2.108224 |
| H | -1.167015 | -2.089761 | 0.333808  |
| H | -4.586794 | -0.951223 | 0.908781  |
| H | -4.787732 | -3.202998 | -0.614465 |
| H | -1.075996 | -1.301316 | -1.234412 |
| H | -2.181166 | -3.798047 | -1.045176 |
| H | -3.707186 | -3.185986 | 0.789138  |
| H | -4.674574 | -0.807671 | -0.856271 |
| H | 0.012712  | 2.963040  | 0.267394  |

54

4pzMePyr2-cis-m ; E = -1106.24555520 Hartree

|   |           |           |           |
|---|-----------|-----------|-----------|
| C | 2.145084  | 0.570763  | 0.535724  |
| C | 2.312241  | 0.927915  | 1.891271  |
| C | 0.828141  | 0.642084  | -0.011082 |
| H | 3.276466  | 0.814842  | 2.367362  |
| C | 1.242004  | 1.382498  | 2.643279  |
| C | -0.222836 | 1.248798  | 0.732837  |
| C | -0.014543 | 1.559038  | 2.087225  |
| H | -0.814995 | 1.979231  | 2.681990  |
| N | 0.650669  | 0.159407  | -1.329546 |
| N | -0.296955 | -0.605306 | -1.660779 |
| C | -1.189326 | -1.182243 | -0.754828 |
| C | -1.003516 | -1.783546 | 0.493590  |
| C | -2.547427 | -1.431629 | -1.089479 |
| N | -3.164428 | -2.077902 | -0.110967 |



|   |           |           |           |
|---|-----------|-----------|-----------|
| N | -2.214370 | -2.287838 | 0.825053  |
| C | -2.548051 | -3.064690 | 1.991250  |
| H | -2.090867 | -4.059513 | 1.954464  |
| H | -2.222490 | -2.555685 | 2.902316  |
| H | -3.631864 | -3.171034 | 2.000707  |
| C | 0.209702  | -2.012536 | 1.319699  |
| H | 0.134738  | -2.949738 | 1.879388  |
| H | 1.093219  | -2.070934 | 0.680856  |
| H | 0.378975  | -1.193703 | 2.027332  |
| C | -3.256115 | -1.049153 | -2.341341 |
| H | -3.648876 | -0.026974 | -2.299542 |
| H | -2.565300 | -1.098573 | -3.187547 |
| H | -4.097219 | -1.723769 | -2.514986 |
| H | 1.401917  | 1.634932  | 3.687965  |
| C | -2.842822 | 2.837161  | -1.225488 |
| C | -1.572210 | 1.990062  | -1.239305 |
| N | -1.433266 | 1.538759  | 0.142531  |
| C | -2.573686 | 1.942871  | 0.946698  |
| C | -3.652487 | 2.216759  | -0.089138 |
| H | -2.605809 | 3.879935  | -0.985116 |
| H | -0.679425 | 2.543711  | -1.552874 |
| H | -2.842822 | 1.152780  | 1.656626  |
| H | -4.106352 | 1.272122  | -0.407114 |
| C | 4.682171  | -0.978991 | -1.646630 |
| C | 3.313166  | -0.319854 | -1.550470 |
| N | 3.232980  | 0.077941  | -0.145602 |
| C | 4.560868  | 0.144289  | 0.456401  |
| C | 5.523244  | -0.140252 | -0.693217 |
| H | 4.622884  | -2.014086 | -1.290705 |
| H | 3.238773  | 0.548616  | -2.218945 |
| H | 4.744750  | 1.129820  | 0.902509  |
| H | 6.437491  | -0.635383 | -0.356153 |
| H | 2.497390  | -0.989886 | -1.818602 |
| H | 5.064789  | -0.993698 | -2.670317 |
| H | 5.809932  | 0.799157  | -1.178783 |
| H | 4.660892  | -0.601538 | 1.259832  |
| H | -2.362111 | 2.859672  | 1.522747  |
| H | -4.443133 | 2.868400  | 0.291178  |
| H | -3.358751 | 2.823296  | -2.189305 |
| H | -1.676226 | 1.146511  | -1.932077 |

54

4pzMePyr2-cis-n ; E = -1106.24541809 Hartree

|   |           |           |           |
|---|-----------|-----------|-----------|
| C | 2.293676  | 0.670493  | 0.301270  |
| C | 2.543017  | 1.523255  | 1.396950  |
| C | 0.951486  | 0.579833  | -0.177960 |
| H | 3.529759  | 1.565293  | 1.837600  |
| C | 1.525322  | 2.279488  | 1.953970  |
| C | -0.045382 | 1.465576  | 0.317131  |
| C | 0.243817  | 2.273633  | 1.428091  |
| H | -0.515166 | 2.921418  | 1.846687  |
| N | 0.706796  | -0.343833 | -1.217809 |
| N | -0.281772 | -1.127389 | -1.224193 |
| C | -1.159174 | -1.298483 | -0.151704 |
| C | -2.491916 | -1.625192 | -0.394791 |
| C | -1.005369 | -1.399141 | 1.267427  |
| N | -2.162881 | -1.726062 | 1.826454  |
| N | -3.051204 | -1.831190 | 0.815504  |
| C | -4.426937 | -2.129660 | 1.112105  |

|   |           |           |           |
|---|-----------|-----------|-----------|
| H | -5.079472 | -1.285288 | 0.865049  |
| H | -4.765122 | -3.011650 | 0.559951  |
| H | -4.485648 | -2.329620 | 2.181151  |
| C | -3.213809 | -1.750300 | -1.684666 |
| H | -3.858456 | -0.887601 | -1.892523 |
| H | -2.473738 | -1.820089 | -2.485381 |
| H | -3.842801 | -2.646435 | -1.708287 |
| C | 0.217101  | -1.318543 | 2.114289  |
| H | 1.062740  | -1.814930 | 1.629515  |
| H | 0.515003  | -0.283832 | 2.304645  |
| H | 0.020110  | -1.810436 | 3.069511  |
| H | 1.746909  | 2.912603  | 2.808673  |
| C | -2.745566 | 2.316618  | -1.966180 |
| C | -1.478015 | 1.496749  | -1.733623 |
| N | -1.283942 | 1.549428  | -0.287985 |
| C | -2.384815 | 2.231641  | 0.368385  |
| C | -3.507059 | 2.142343  | -0.654249 |
| H | -2.497209 | 3.374401  | -2.109668 |
| H | -0.599505 | 1.894115  | -2.255224 |
| H | -2.619061 | 1.748207  | 1.323439  |
| H | -3.972697 | 1.151122  | -0.609873 |
| C | 4.648570  | -1.815681 | -1.054982 |
| C | 3.295057  | -1.131309 | -1.205982 |
| N | 3.333099  | -0.080454 | -0.189427 |
| C | 4.692641  | 0.154036  | 0.278846  |
| C | 5.565009  | -0.661927 | -0.667908 |
| H | 4.607797  | -2.552668 | -0.244492 |
| H | 3.168392  | -0.712724 | -2.211783 |
| H | 4.939903  | 1.222518  | 0.251503  |
| H | 6.501859  | -0.977430 | -0.201642 |
| H | 2.458162  | -1.810258 | -1.039904 |
| H | 4.955596  | -2.332516 | -1.967854 |
| H | 5.812024  | -0.066488 | -1.554009 |
| H | 4.814885  | -0.184051 | 1.320413  |
| H | -2.152234 | 3.290903  | 0.571736  |
| H | -4.283670 | 2.894548  | -0.494232 |
| H | -3.301752 | 1.980090  | -2.845326 |
| H | -1.613196 | 0.466740  | -2.085998 |

54

4pzMePyr2-trans-m ; E = -1106.25444011 Hartree

|   |           |           |           |
|---|-----------|-----------|-----------|
| C | 2.513760  | -0.279460 | 0.176685  |
| C | 3.715586  | 0.381490  | 0.501299  |
| C | 1.312598  | 0.501078  | 0.102326  |
| H | 4.628718  | -0.181722 | 0.633212  |
| C | 3.730638  | 1.746464  | 0.724200  |
| C | 1.382774  | 1.931781  | 0.186716  |
| C | 2.599370  | 2.526909  | 0.564868  |
| H | 2.670763  | 3.598905  | 0.688391  |
| N | 0.132073  | -0.230809 | -0.002706 |
| N | -0.877947 | 0.236396  | 0.602891  |
| C | -2.036464 | -0.512186 | 0.458684  |
| C | -2.432664 | -1.464293 | -0.484894 |
| C | -3.151299 | -0.359749 | 1.326068  |
| N | -4.143180 | -1.158836 | 0.964588  |
| N | -3.690480 | -1.813517 | -0.128206 |
| C | -4.573905 | -2.716040 | -0.818516 |
| H | -4.923702 | -2.290200 | -1.765623 |
| H | -4.074097 | -3.667472 | -1.020697 |

|   |           |           |           |
|---|-----------|-----------|-----------|
| H | -5.429625 | -2.886268 | -0.166537 |
| C | -1.764620 | -1.992599 | -1.700739 |
| H | -2.452330 | -2.036583 | -2.552252 |
| H | -0.918732 | -1.350069 | -1.948099 |
| H | -1.366456 | -3.002476 | -1.542358 |
| C | -3.250443 | 0.531047  | 2.513446  |
| H | -2.656378 | 0.145858  | 3.348897  |
| H | -2.861871 | 1.526061  | 2.279114  |
| H | -4.290282 | 0.611008  | 2.836511  |
| H | 4.665897  | 2.223023  | 1.005495  |
| C | -1.125249 | 3.703388  | -1.733698 |
| C | -0.732406 | 2.382486  | -1.080898 |
| N | 0.328953  | 2.745390  | -0.153203 |
| C | 0.441309  | 4.190506  | -0.029914 |
| C | -0.865225 | 4.706728  | -0.615219 |
| H | -0.472107 | 3.918374  | -2.587641 |
| H | -0.378842 | 1.632583  | -1.798649 |
| H | 0.591984  | 4.484078  | 1.015424  |
| H | -1.662779 | 4.652564  | 0.134138  |
| C | 2.111343  | -3.944291 | 0.126026  |
| C | 1.454065  | -2.588860 | -0.108405 |
| N | 2.560189  | -1.643306 | 0.008388  |
| C | 3.844814  | -2.330735 | -0.030551 |
| C | 3.500790  | -3.749142 | -0.465797 |
| H | 2.184833  | -4.143800 | 1.201279  |
| H | 0.995662  | -2.542230 | -1.104723 |
| H | 4.532337  | -1.836551 | -0.727393 |
| H | 4.236740  | -4.479830 | -0.120696 |
| H | 0.664128  | -2.366349 | 0.610636  |
| H | 1.549043  | -4.762739 | -0.331729 |
| H | 3.455244  | -3.804292 | -1.559399 |
| H | 4.325637  | -2.330612 | 0.961094  |
| H | 1.296706  | 4.574879  | -0.610475 |
| H | -0.787502 | 5.741435  | -0.958255 |
| H | -2.158917 | 3.698954  | -2.089069 |
| H | -1.579963 | 1.939106  | -0.542981 |

54

4pzMePyr2-trans-n ; E = -1106.25528133 Hartree

|   |           |           |           |
|---|-----------|-----------|-----------|
| C | 2.565660  | 0.089490  | 0.316870  |
| C | 3.577814  | 0.938185  | 0.812192  |
| C | 1.250884  | 0.635427  | 0.149341  |
| H | 4.560772  | 0.542728  | 1.026786  |
| C | 3.311010  | 2.264717  | 1.094624  |
| C | 1.042262  | 2.047586  | 0.295482  |
| C | 2.076406  | 2.833184  | 0.832875  |
| H | 1.929799  | 3.890702  | 1.005385  |
| N | 0.231322  | -0.286729 | -0.102177 |
| N | -0.879564 | -0.030275 | 0.447241  |
| C | -1.895299 | -0.935076 | 0.183599  |
| C | -3.074961 | -0.912388 | 0.925954  |
| C | -2.091150 | -1.952930 | -0.797385 |
| N | -3.288638 | -2.504011 | -0.651774 |
| N | -3.861995 | -1.870102 | 0.395493  |
| C | -5.167088 | -2.281006 | 0.840458  |
| H | -5.113204 | -2.818978 | 1.793044  |
| H | -5.824746 | -1.415292 | 0.959481  |
| H | -5.573115 | -2.943035 | 0.076675  |
| C | -3.447762 | -0.045060 | 2.069740  |

|   |           |           |           |
|---|-----------|-----------|-----------|
| H | -3.562923 | -0.615429 | 2.998623  |
| H | -2.650884 | 0.687777  | 2.212492  |
| H | -4.388341 | 0.487665  | 1.888924  |
| C | -1.199779 | -2.384989 | -1.907506 |
| H | -0.697564 | -1.525062 | -2.357860 |
| H | -0.414392 | -3.059174 | -1.552395 |
| H | -1.786296 | -2.910327 | -2.664740 |
| H | 4.103090  | 2.885417  | 1.504861  |
| C | -1.514492 | 3.424796  | -1.861177 |
| C | -0.969174 | 2.167343  | -1.192875 |
| N | -0.105685 | 2.672090  | -0.134089 |
| C | -0.268689 | 4.107970  | 0.029562  |
| C | -1.569843 | 4.411099  | -0.699480 |
| H | -0.815437 | 3.786339  | -2.624368 |
| H | -0.405663 | 1.522520  | -1.877282 |
| H | -0.294876 | 4.382213  | 1.090792  |
| H | -2.426474 | 4.187433  | -0.053682 |
| C | 2.888440  | -3.563309 | -0.087821 |
| C | 2.013189  | -2.329332 | -0.272263 |
| N | 2.894196  | -1.224428 | 0.087095  |
| C | 4.286064  | -1.653907 | 0.138501  |
| C | 4.272420  | -3.052639 | -0.465966 |
| H | 2.876299  | -3.876571 | 0.962484  |
| H | 1.666966  | -2.238228 | -1.310192 |
| H | 4.929218  | -0.966897 | -0.424483 |
| H | 5.091162  | -3.674209 | -0.094447 |
| H | 1.120263  | -2.341153 | 0.354619  |
| H | 2.549661  | -4.406544 | -0.695673 |
| H | 4.363927  | -2.988510 | -1.556111 |
| H | 4.656851  | -1.675087 | 1.175929  |
| H | 0.565443  | 4.659970  | -0.435447 |
| H | -1.639285 | 5.456798  | -1.009509 |
| H | -2.481797 | 3.254024  | -2.340768 |
| H | -1.781386 | 1.560137  | -0.774019 |

24

4pzH-ts-B-m ; E = -605.300223945 Hartree

|   |           |           |           |
|---|-----------|-----------|-----------|
| C | 2.390899  | -0.143536 | 1.220656  |
| C | 3.618130  | 0.498183  | 1.196611  |
| C | 1.750942  | -0.476895 | -0.000158 |
| H | 4.089995  | 0.740516  | 2.145318  |
| C | 4.250194  | 0.831889  | 0.000228  |
| C | 2.390527  | -0.142103 | -1.220777 |
| H | 1.909954  | -0.400013 | -2.157877 |
| C | 3.617788  | 0.499549  | -1.196352 |
| H | 4.089381  | 0.742963  | -2.144918 |
| H | 1.910608  | -0.402538 | 2.157599  |
| N | 0.575894  | -1.086562 | -0.000342 |
| N | -0.498176 | -1.674443 | -0.000559 |
| C | -1.649061 | -0.862675 | -0.000260 |
| C | -1.782827 | 0.522263  | 0.000099  |
| C | -2.971933 | -1.352168 | -0.000275 |
| N | -3.849337 | -0.361358 | 0.000029  |
| N | -3.102836 | 0.761409  | 0.000237  |
| C | -3.770329 | 2.041267  | 0.000603  |
| H | -4.397111 | 2.129634  | 0.890389  |
| H | -3.020447 | 2.832522  | 0.000422  |
| H | -4.397716 | 2.129793  | -0.888739 |
| H | -1.042115 | 1.308389  | 0.000142  |

|   |           |           |           |
|---|-----------|-----------|-----------|
| H | -3.298792 | -2.382696 | -0.000525 |
| H | 5.211445  | 1.333457  | 0.000376  |

24

4pzH-ts-B-n ; E = -605.300668029 Hartree

|   |           |           |           |
|---|-----------|-----------|-----------|
| C | -2.516767 | 0.155681  | 1.220780  |
| C | -3.799091 | -0.367249 | 1.195836  |
| C | -1.849111 | 0.430174  | 0.000692  |
| H | -4.290691 | -0.568202 | 2.144162  |
| C | -4.460287 | -0.635912 | -0.001059 |
| C | -2.516889 | 0.159990  | -1.220290 |
| H | -2.012746 | 0.370094  | -2.156874 |
| C | -3.799195 | -0.363061 | -1.197065 |
| H | -4.290876 | -0.560696 | -2.146046 |
| H | -2.012535 | 0.362486  | 2.158051  |
| N | -0.623589 | 0.931895  | 0.001518  |
| N | 0.499207  | 1.419897  | 0.002314  |
| C | 1.569863  | 0.505144  | 0.000858  |
| C | 2.899920  | 0.897383  | 0.001412  |
| C | 1.610302  | -0.910189 | -0.001304 |
| N | 2.858129  | -1.345945 | -0.002013 |
| N | 3.622651  | -0.234249 | -0.000331 |
| C | 5.058583  | -0.373910 | -0.000825 |
| H | 5.377404  | -0.918781 | -0.891939 |
| H | 5.511028  | 0.618058  | 0.001867  |
| H | 5.377407  | -0.923614 | 0.887301  |
| H | 3.344921  | 1.881304  | 0.002891  |
| H | 0.781565  | -1.604705 | -0.002301 |
| H | -5.464226 | -1.045436 | -0.001732 |

24

4pzH-ts-H-m ; E = -605.295863534 Hartree

|   |           |           |           |
|---|-----------|-----------|-----------|
| C | -1.735526 | 0.776478  | 0.307693  |
| C | -2.815404 | 1.646350  | 0.362547  |
| C | -1.940202 | -0.563044 | -0.029499 |
| H | -2.661089 | 2.687383  | 0.632954  |
| C | -4.101847 | 1.186964  | 0.075818  |
| C | -3.227512 | -1.026727 | -0.296718 |
| H | -3.350180 | -2.078172 | -0.539509 |
| C | -4.305991 | -0.150908 | -0.254078 |
| H | -5.307107 | -0.510448 | -0.473145 |
| H | -0.729072 | 1.110461  | 0.541461  |
| N | -0.902438 | -1.558031 | -0.092092 |
| N | 0.260899  | -1.128732 | -0.009742 |
| C | 1.500285  | -0.690266 | 0.044029  |
| C | 1.987462  | 0.615574  | -0.194905 |
| C | 2.700215  | -1.428581 | 0.327613  |
| N | 3.771579  | -0.667225 | 0.276258  |
| N | 3.316533  | 0.561439  | -0.075747 |
| C | 4.280007  | 1.604179  | -0.329024 |
| H | 4.810876  | 1.413218  | -1.265743 |
| H | 3.763549  | 2.562688  | -0.390443 |
| H | 5.000394  | 1.626851  | 0.490062  |
| H | 1.466139  | 1.516674  | -0.484362 |
| H | 2.775197  | -2.472836 | 0.600526  |
| H | -4.943635 | 1.871907  | 0.116599  |

24

4pzH-ts-H-n ; E = -605.296293711 Hartree

|   |           |          |          |
|---|-----------|----------|----------|
| C | -1.904227 | 0.807698 | 0.214257 |
| C | -3.077175 | 1.547823 | 0.258873 |

|   |           |           |           |
|---|-----------|-----------|-----------|
| C | -1.962837 | -0.571796 | 0.007569  |
| H | -3.035435 | 2.620657  | 0.425631  |
| C | -4.311771 | 0.917907  | 0.093466  |
| C | -3.196545 | -1.204219 | -0.140218 |
| H | -3.203134 | -2.280610 | -0.284988 |
| C | -4.369592 | -0.459404 | -0.106404 |
| H | -5.329760 | -0.951253 | -0.231740 |
| H | -0.935110 | 1.277464  | 0.351877  |
| N | -0.818990 | -1.444049 | -0.034718 |
| N | 0.290231  | -0.882596 | -0.042646 |
| C | 1.470908  | -0.302289 | -0.085302 |
| C | 2.726437  | -0.900081 | 0.164768  |
| C | 1.825088  | 1.057181  | -0.393994 |
| N | 3.125440  | 1.251663  | -0.344350 |
| N | 3.647538  | 0.055123  | 0.026451  |
| C | 5.067695  | -0.030289 | 0.263016  |
| H | 5.597014  | 0.403570  | -0.586852 |
| H | 5.334998  | 0.520587  | 1.168723  |
| H | 5.349164  | -1.077696 | 0.375368  |
| H | 2.968303  | -1.911868 | 0.455966  |
| H | 1.163421  | 1.861129  | -0.689638 |
| H | -5.226874 | 1.501846  | 0.126308  |

52

4pzHAMid2-ts-B-m ; E = -1478.12028087 Hartree

|   |           |           |           |
|---|-----------|-----------|-----------|
| C | 2.121389  | 1.655123  | 0.009619  |
| C | 2.352425  | 3.013553  | 0.212479  |
| C | 0.781794  | 1.166699  | -0.127203 |
| H | 3.366387  | 3.363133  | 0.348452  |
| C | 1.269998  | 3.888679  | 0.205075  |
| C | -0.299713 | 2.109606  | -0.128905 |
| C | -0.045267 | 3.469082  | 0.020113  |
| H | -0.869750 | 4.168466  | 0.002771  |
| N | 0.541107  | -0.131374 | -0.248895 |
| N | 0.344139  | -1.358220 | -0.419171 |
| C | -0.887749 | -1.837137 | 0.064147  |
| C | -1.616309 | -1.462921 | 1.196153  |
| C | -1.623393 | -2.892471 | -0.531823 |
| N | -2.734230 | -3.126000 | 0.153263  |
| N | -2.696741 | -2.274376 | 1.202663  |
| C | -3.798388 | -2.255055 | 2.130008  |
| H | -3.432286 | -2.175989 | 3.156228  |
| H | -4.473229 | -1.416881 | 1.922938  |
| H | -4.340842 | -3.192148 | 2.010621  |
| C | -1.332269 | -0.488012 | 2.281867  |
| H | -1.371976 | -0.968516 | 3.265607  |
| H | -0.338336 | -0.059706 | 2.151253  |
| H | -2.049863 | 0.339442  | 2.284358  |
| C | -1.294617 | -3.639046 | -1.775590 |
| H | -1.428936 | -3.010233 | -2.661989 |
| H | -0.249966 | -3.962013 | -1.765211 |
| H | -1.942397 | -4.512672 | -1.869267 |
| H | 1.461143  | 4.949255  | 0.339302  |
| N | 3.105351  | 0.686976  | -0.044781 |
| H | 2.760260  | -0.241518 | -0.266016 |
| N | -1.554233 | 1.559947  | -0.326280 |
| H | -1.559771 | 0.548928  | -0.416676 |
| C | 4.456258  | 0.841672  | 0.128004  |
| O | 5.018435  | 1.890814  | 0.404718  |

|   |           |           |           |
|---|-----------|-----------|-----------|
| C | -2.771418 | 2.191388  | -0.358904 |
| O | -2.951012 | 3.393756  | -0.240548 |
| C | 6.558667  | -0.640894 | 0.045468  |
| C | 6.732189  | -2.028963 | -0.217475 |
| C | 5.486396  | -2.528536 | -0.448564 |
| O | 4.557355  | -1.553262 | -0.347864 |
| C | 5.219370  | -0.401103 | -0.045801 |
| H | 7.309668  | 0.100256  | 0.273517  |
| H | 7.658110  | -2.584877 | -0.233923 |
| H | 5.112571  | -3.512315 | -0.687114 |
| C | -5.246285 | 1.484859  | -0.571797 |
| C | -5.851466 | 0.210578  | -0.770009 |
| C | -4.830181 | -0.688413 | -0.856254 |
| O | -3.641882 | -0.059147 | -0.723303 |
| C | -3.899779 | 1.267188  | -0.548595 |
| H | -5.724880 | 2.445913  | -0.458163 |
| H | -6.906248 | -0.010789 | -0.842829 |
| H | -4.770499 | -1.758956 | -0.987559 |

52

4pzHAMid2-ts-B-n ; E = -1478.11684741 Hartree

|   |           |           |           |
|---|-----------|-----------|-----------|
| C | -2.104529 | -1.713990 | 0.005353  |
| C | -2.359900 | -3.070608 | 0.174920  |
| C | -0.757504 | -1.241081 | -0.131842 |
| H | -3.379882 | -3.402138 | 0.311346  |
| C | -1.296734 | -3.967700 | 0.119665  |
| C | 0.305261  | -2.200997 | -0.157457 |
| C | 0.019968  | -3.561016 | -0.068222 |
| H | 0.830190  | -4.273980 | -0.135805 |
| N | -0.530477 | 0.057242  | -0.281020 |
| N | -0.286594 | 1.262931  | -0.503547 |
| C | 0.886813  | 1.798395  | 0.046152  |
| C | 1.512238  | 2.909942  | -0.514471 |
| C | 1.602617  | 1.520531  | 1.247012  |
| N | 2.600296  | 2.384321  | 1.387435  |
| N | 2.536370  | 3.201030  | 0.310467  |
| C | 3.547446  | 4.211519  | 0.135195  |
| H | 4.304598  | 3.896138  | -0.591166 |
| H | 3.096189  | 5.145603  | -0.207205 |
| H | 4.019601  | 4.371102  | 1.104055  |
| C | 1.188468  | 3.644960  | -1.761357 |
| H | 1.940820  | 3.481054  | -2.541020 |
| H | 0.227343  | 3.285270  | -2.133671 |
| H | 1.115201  | 4.724029  | -1.589013 |
| C | 1.307006  | 0.518872  | 2.309498  |
| H | 1.811663  | 0.812322  | 3.232054  |
| H | 0.231006  | 0.458472  | 2.496322  |
| H | 1.647396  | -0.485161 | 2.040742  |
| H | -1.504767 | -5.028833 | 0.217730  |
| N | -3.076734 | -0.729736 | -0.024306 |
| H | -2.722570 | 0.194338  | -0.247943 |
| N | 1.584692  | -1.687671 | -0.302396 |
| H | 1.653170  | -0.679193 | -0.221083 |
| C | -4.426541 | -0.866474 | 0.158191  |
| O | -5.004344 | -1.908186 | 0.432492  |
| C | 2.760733  | -2.376477 | -0.467270 |
| O | 2.855810  | -3.575170 | -0.682888 |
| C | -6.509186 | 0.644791  | 0.106975  |
| C | -6.668059 | 2.037399  | -0.142220 |

|   |           |           |           |
|---|-----------|-----------|-----------|
| C | -5.418631 | 2.523518  | -0.380692 |
| O | -4.500523 | 1.535709  | -0.297340 |
| C | -5.174167 | 0.389060  | 0.001001  |
| H | -7.266857 | -0.089192 | 0.335984  |
| H | -7.587165 | 2.604794  | -0.144762 |
| H | -5.035110 | 3.504842  | -0.613839 |
| C | 5.280209  | -1.801982 | -0.509085 |
| C | 5.975830  | -0.603025 | -0.180711 |
| C | 5.022890  | 0.306832  | 0.167715  |
| O | 3.793981  | -0.241002 | 0.068558  |
| C | 3.954306  | -1.529108 | -0.341487 |
| H | 5.687880  | -2.751403 | -0.822002 |
| H | 7.043720  | -0.440585 | -0.190407 |
| H | 5.044113  | 1.324726  | 0.525489  |

52

4pzHAmid2-ts-H-m ; E = -1478.11838419 Hartree

|   |           |           |           |
|---|-----------|-----------|-----------|
| C | 0.111351  | -1.954017 | -0.168188 |
| C | -0.132107 | -3.312097 | 0.053369  |
| C | -0.963961 | -1.037001 | -0.132526 |
| H | 0.698627  | -4.003579 | 0.039375  |
| C | -1.433574 | -3.742904 | 0.277383  |
| C | -2.284646 | -1.517903 | 0.027968  |
| C | -2.518062 | -2.874568 | 0.254565  |
| H | -3.531171 | -3.217231 | 0.410604  |
| N | -0.879995 | 0.368494  | -0.352176 |
| N | 0.155484  | 0.956245  | 0.021250  |
| C | 1.263350  | 1.587897  | 0.328491  |
| C | 2.251356  | 1.192288  | 1.272432  |
| C | 1.802199  | 2.785568  | -0.267436 |
| N | 2.989109  | 3.060543  | 0.230278  |
| N | 3.212421  | 2.117255  | 1.192442  |
| C | 4.450717  | 2.162466  | 1.928384  |
| H | 4.272151  | 1.923534  | 2.979029  |
| H | 5.173138  | 1.452438  | 1.512063  |
| H | 4.846372  | 3.173931  | 1.843319  |
| C | 2.240586  | 0.073523  | 2.241812  |
| H | 2.160305  | 0.432665  | 3.274545  |
| H | 1.378228  | -0.565161 | 2.039409  |
| H | 3.148922  | -0.533394 | 2.166046  |
| C | 1.187915  | 3.575726  | -1.362963 |
| H | 1.290827  | 3.062888  | -2.325657 |
| H | 0.116956  | 3.701960  | -1.179915 |
| H | 1.665179  | 4.554111  | -1.440880 |
| H | -1.611058 | -4.799366 | 0.454867  |
| N | 1.384709  | -1.478455 | -0.497393 |
| H | 1.434282  | -0.517889 | -0.801008 |
| N | -3.288902 | -0.557479 | -0.027381 |
| H | -2.946325 | 0.371546  | -0.256331 |
| C | 2.589932  | -2.109207 | -0.355315 |
| O | 2.766919  | -3.238922 | 0.076579  |
| C | -4.633231 | -0.733103 | 0.137371  |
| O | -5.191621 | -1.789280 | 0.400822  |
| C | 5.078228  | -1.472461 | -0.567146 |
| C | 5.722374  | -0.282717 | -1.016801 |
| C | 4.728544  | 0.556764  | -1.422574 |
| O | 3.522302  | -0.029482 | -1.258944 |
| C | 3.740112  | -1.266932 | -0.730824 |
| H | 5.525375  | -2.369899 | -0.166873 |



|   |           |           |           |
|---|-----------|-----------|-----------|
| H | 6.782853  | -0.078365 | -1.042417 |
| H | 4.711008  | 1.561894  | -1.814976 |
| C | -6.759133 | 0.715190  | 0.065361  |
| C | -6.959576 | 2.102398  | -0.184579 |
| C | -5.723541 | 2.627763  | -0.408702 |
| O | -4.775598 | 1.669402  | -0.315703 |
| C | -5.415685 | 0.501888  | -0.025632 |
| H | -7.495269 | -0.043065 | 0.285227  |
| H | -7.896038 | 2.640574  | -0.197135 |
| H | -5.369049 | 3.621082  | -0.637179 |

52

4pzHAMid2-ts-H-n ; E = -1478.11386239 Hartree

|   |           |           |           |
|---|-----------|-----------|-----------|
| C | 0.108413  | -2.035276 | -0.112141 |
| C | -0.173008 | -3.389137 | 0.089609  |
| C | -0.946051 | -1.094237 | -0.100881 |
| H | 0.642563  | -4.098589 | 0.097454  |
| C | -1.490322 | -3.791574 | 0.268158  |
| C | -2.281942 | -1.545681 | 0.013316  |
| C | -2.553656 | -2.898389 | 0.218516  |
| H | -3.578721 | -3.218981 | 0.339010  |
| N | -0.824189 | 0.311334  | -0.295388 |
| N | 0.215289  | 0.870633  | 0.110830  |
| C | 1.297690  | 1.492237  | 0.514659  |
| C | 1.812278  | 2.714574  | 0.009755  |
| C | 2.266714  | 1.081357  | 1.508980  |
| N | 3.246591  | 1.956412  | 1.584377  |
| N | 2.971474  | 2.907704  | 0.646369  |
| C | 3.968680  | 3.917432  | 0.402525  |
| H | 3.508529  | 4.788262  | -0.066052 |
| H | 4.407815  | 4.202813  | 1.358833  |
| H | 4.760545  | 3.530303  | -0.247503 |
| C | 1.250794  | 3.570223  | -1.058595 |
| H | 0.242074  | 3.213690  | -1.281591 |
| H | 1.190621  | 4.618795  | -0.749124 |
| H | 1.838276  | 3.525951  | -1.982870 |
| C | 2.170109  | -0.082925 | 2.428270  |
| H | 1.961502  | 0.245446  | 3.451325  |
| H | 1.361860  | -0.745957 | 2.113454  |
| H | 3.107382  | -0.645123 | 2.442899  |
| H | -1.697316 | -4.844927 | 0.431662  |
| N | 1.398190  | -1.586407 | -0.404190 |
| H | 1.477477  | -0.620623 | -0.683357 |
| N | -3.262483 | -0.561646 | -0.062505 |
| H | -2.891124 | 0.362494  | -0.263811 |
| C | 2.584748  | -2.250007 | -0.255031 |
| O | 2.726877  | -3.386699 | 0.170613  |
| C | -4.614851 | -0.708235 | 0.053341  |
| O | -5.207163 | -1.754451 | 0.279844  |
| C | 5.088371  | -1.697681 | -0.503185 |
| C | 5.767035  | -0.551177 | -1.006896 |
| C | 4.796928  | 0.313025  | -1.412475 |
| O | 3.571114  | -0.213697 | -1.198194 |
| C | 3.756121  | -1.443158 | -0.638537 |
| H | 5.509923  | -2.600466 | -0.087851 |
| H | 6.833605  | -0.389696 | -1.061262 |
| H | 4.816071  | 1.291797  | -1.866581 |
| C | -6.704217 | 0.788735  | -0.065152 |
| C | -6.866571 | 2.183845  | -0.298631 |

|   |           |          |           |
|---|-----------|----------|-----------|
| C | -5.612941 | 2.685250 | -0.473766 |
| O | -4.689118 | 1.704825 | -0.365893 |
| C | -5.363530 | 0.547224 | -0.115886 |
| H | -7.463125 | 0.043438 | 0.118557  |
| H | -7.790369 | 2.742622 | -0.332447 |
| H | -5.230134 | 3.674164 | -0.673874 |

24

4pzHC11A-ts-B-m ; E = -1064.73982498 Hartree

|    |           |           |           |
|----|-----------|-----------|-----------|
| C  | 2.077083  | 0.652267  | 0.249680  |
| C  | 3.315610  | 0.968978  | -0.279365 |
| C  | 1.561451  | -0.669734 | 0.182132  |
| H  | 3.673643  | 1.989007  | -0.183294 |
| C  | 4.069370  | 0.004097  | -0.942047 |
| C  | 2.352669  | -1.644473 | -0.479406 |
| H  | 1.975957  | -2.659184 | -0.538808 |
| C  | 3.565342  | -1.292339 | -1.044221 |
| H  | 4.139933  | -2.058345 | -1.557021 |
| Cl | 1.103963  | 1.864869  | 1.029464  |
| N  | 0.389677  | -0.966612 | 0.706228  |
| N  | -0.691045 | -1.260044 | 1.206871  |
| C  | -1.829279 | -0.758283 | 0.560916  |
| C  | -1.949391 | 0.119926  | -0.513104 |
| C  | -3.157983 | -1.057639 | 0.932122  |
| N  | -4.024447 | -0.428380 | 0.156216  |
| N  | -3.265645 | 0.280199  | -0.706560 |
| C  | -3.920850 | 1.100600  | -1.697114 |
| H  | -4.511442 | 0.472115  | -2.367273 |
| H  | -4.581535 | 1.814206  | -1.201127 |
| H  | -3.164209 | 1.637580  | -2.269343 |
| H  | -1.200605 | 0.628560  | -1.101403 |
| H  | -3.495128 | -1.706252 | 1.728295  |
| H  | 5.032105  | 0.263006  | -1.367754 |

24

4pzHC11A-ts-B-n ; E = -1064.73984731 Hartree

|    |           |           |           |
|----|-----------|-----------|-----------|
| C  | -2.244315 | -0.671891 | 0.055940  |
| C  | -3.532503 | -0.725637 | -0.445874 |
| C  | -1.620116 | 0.569513  | 0.348132  |
| H  | -3.971104 | -1.699721 | -0.637243 |
| C  | -4.236555 | 0.443775  | -0.719764 |
| C  | -2.357861 | 1.751077  | 0.080500  |
| H  | -1.896889 | 2.707542  | 0.298935  |
| C  | -3.628454 | 1.671520  | -0.461310 |
| H  | -4.161481 | 2.595097  | -0.668228 |
| Cl | -1.343402 | -2.128437 | 0.357781  |
| N  | -0.399638 | 0.612562  | 0.844336  |
| N  | 0.726692  | 0.661575  | 1.324990  |
| C  | 1.784656  | 0.381233  | 0.448873  |
| C  | 3.117862  | 0.444964  | 0.829045  |
| C  | 1.814223  | -0.015163 | -0.911086 |
| N  | 3.057475  | -0.177677 | -1.326100 |
| N  | 3.830661  | 0.108733  | -0.256383 |
| C  | 5.264702  | 0.023586  | -0.389556 |
| H  | 5.724825  | 0.269706  | 0.567713  |
| H  | 5.548066  | -0.989523 | -0.682178 |
| H  | 5.608577  | 0.725482  | -1.152330 |
| H  | 3.569278  | 0.701531  | 1.775836  |
| H  | 0.980450  | -0.193844 | -1.575534 |
| H  | -5.240046 | 0.392950  | -1.126547 |

24

4pzHC11A-ts-H-m ; E = -1064.72983880 Hartree

|    |           |           |           |
|----|-----------|-----------|-----------|
| C  | -1.891053 | -0.614856 | -0.271214 |
| C  | -3.035343 | -1.329496 | 0.073311  |
| C  | -1.822624 | 0.768114  | -0.070010 |
| H  | -3.063530 | -2.398923 | -0.108450 |
| C  | -4.126485 | -0.671598 | 0.627686  |
| C  | -2.950488 | 1.413443  | 0.445890  |
| H  | -2.885321 | 2.492320  | 0.554810  |
| C  | -4.085597 | 0.708953  | 0.813781  |
| H  | -4.939246 | 1.231542  | 1.233842  |
| Cl | -0.590654 | -1.497186 | -1.024440 |
| N  | -0.746037 | 1.668232  | -0.401537 |
| N  | 0.409914  | 1.229926  | -0.298388 |
| C  | 1.645562  | 0.813550  | -0.143325 |
| C  | 2.103079  | -0.348880 | 0.521330  |
| C  | 2.866270  | 1.431966  | -0.582681 |
| N  | 3.923855  | 0.734997  | -0.234217 |
| N  | 3.433242  | -0.328901 | 0.458617  |
| C  | 4.371532  | -1.256305 | 1.041290  |
| H  | 3.823054  | -2.092409 | 1.475779  |
| H  | 5.046343  | -1.622837 | 0.265464  |
| H  | 4.958017  | -0.757848 | 1.817081  |
| H  | 1.551157  | -1.122882 | 1.033286  |
| H  | 2.967868  | 2.342102  | -1.158935 |
| H  | -5.013153 | -1.238028 | 0.894922  |

24

4pzHC11A-ts-H-n ; E = -1064.72919826 Hartree

|    |           |           |           |
|----|-----------|-----------|-----------|
| C  | -2.010750 | -0.612014 | -0.191691 |
| C  | -3.242156 | -1.157988 | 0.161228  |
| C  | -1.820011 | 0.774524  | -0.194871 |
| H  | -3.364924 | -2.235927 | 0.141482  |
| C  | -4.296658 | -0.326963 | 0.519713  |
| C  | -2.909001 | 1.591010  | 0.122865  |
| H  | -2.744347 | 2.663602  | 0.072729  |
| C  | -4.131030 | 1.056460  | 0.499087  |
| H  | -4.954360 | 1.711970  | 0.765002  |
| Cl | -0.759407 | -1.710815 | -0.693487 |
| N  | -0.638376 | 1.508029  | -0.573826 |
| N  | 0.456426  | 0.990925  | -0.303706 |
| C  | 1.630349  | 0.499004  | 0.021383  |
| C  | 2.896639  | 0.920625  | -0.443300 |
| C  | 1.960624  | -0.573375 | 0.921676  |
| N  | 3.259015  | -0.764288 | 1.000011  |
| N  | 3.802719  | 0.136525  | 0.138136  |
| C  | 5.231219  | 0.118512  | -0.059001 |
| H  | 5.521176  | 0.984706  | -0.654354 |
| H  | 5.726995  | 0.156685  | 0.912488  |
| H  | 5.528459  | -0.798139 | -0.574878 |
| H  | 3.155148  | 1.687710  | -1.158565 |
| H  | 1.279048  | -1.160088 | 1.521824  |
| H  | -5.251091 | -0.763774 | 0.796709  |

24

4pzHC11B-ts-B-m ; E = -1064.73982867 Hartree

|   |           |           |           |
|---|-----------|-----------|-----------|
| C | -2.356218 | -1.641744 | -0.485171 |
| C | -3.569369 | -1.285477 | -1.046344 |
| C | -1.562365 | -0.670948 | 0.179012  |
| H | -4.146058 | -2.048540 | -1.561173 |

|    |           |           |           |
|----|-----------|-----------|-----------|
| C  | -4.071213 | 0.011330  | -0.938156 |
| C  | -2.075510 | 0.651741  | 0.251834  |
| Cl | -1.098255 | 1.860533  | 1.034212  |
| C  | -3.314615 | 0.972501  | -0.273316 |
| H  | -3.670707 | 1.992784  | -0.172841 |
| H  | -1.981272 | -2.656826 | -0.549182 |
| N  | -0.390395 | -0.971750 | 0.700366  |
| N  | 0.690220  | -1.267917 | 1.199667  |
| C  | 1.828575  | -0.763372 | 0.556086  |
| C  | 1.948750  | 0.123361  | -0.510903 |
| C  | 3.157225  | -1.069591 | 0.921733  |
| N  | 4.023739  | -0.436522 | 0.148969  |
| N  | 3.265020  | 0.280860  | -0.706572 |
| C  | 3.920264  | 1.118455  | -1.682581 |
| H  | 3.163192  | 1.603804  | -2.298668 |
| H  | 4.521582  | 1.875771  | -1.175162 |
| H  | 4.570711  | 0.507768  | -2.311904 |
| H  | 1.199862  | 0.639724  | -1.092824 |
| H  | 3.494123  | -1.727146 | 1.711037  |
| H  | -5.034329 | 0.273379  | -1.361061 |

24

4pzHCl1B-ts-B-n ; E = -1064.73984738 Hartree

|    |           |           |           |
|----|-----------|-----------|-----------|
| C  | 2.359092  | 1.750926  | 0.078785  |
| C  | 3.629879  | 1.669944  | -0.462351 |
| C  | 1.620481  | 0.570147  | 0.347471  |
| H  | 4.163620  | 2.592940  | -0.670014 |
| C  | 4.237276  | 0.441514  | -0.719202 |
| C  | 2.243907  | -0.671993 | 0.056725  |
| Cl | 1.341607  | -2.127560 | 0.358893  |
| C  | 3.532266  | -0.727130 | -0.444512 |
| H  | 3.970240  | -1.701709 | -0.634797 |
| H  | 1.898648  | 2.707932  | 0.295957  |
| N  | 0.399853  | 0.614491  | 0.843196  |
| N  | -0.726435 | 0.663931  | 1.323916  |
| C  | -1.784450 | 0.382133  | 0.448346  |
| C  | -3.117617 | 0.446577  | 0.828550  |
| C  | -1.814187 | -0.016324 | -0.911011 |
| N  | -3.057499 | -0.179407 | -1.325628 |
| N  | -3.830551 | 0.108658  | -0.256260 |
| C  | -5.264598 | 0.023081  | -0.389103 |
| H  | -5.607668 | 0.719584  | -1.157120 |
| H  | -5.548621 | -0.991971 | -0.674367 |
| H  | -5.724874 | 0.276553  | 0.566174  |
| H  | -3.568889 | 0.704676  | 1.774960  |
| H  | -0.980589 | -0.196028 | -1.575338 |
| H  | 5.240948  | 0.389577  | -1.125401 |

24

4pzHCl1B-ts-H-m ; E = -1064.73075532 Hartree

|    |           |           |           |
|----|-----------|-----------|-----------|
| C  | 1.029105  | 1.336958  | -0.406494 |
| C  | 1.920393  | 2.396555  | -0.342166 |
| C  | 1.450899  | 0.024445  | -0.186160 |
| H  | 1.578525  | 3.410245  | -0.528835 |
| C  | 3.260870  | 2.152808  | -0.045326 |
| C  | 2.801806  | -0.205323 | 0.093121  |
| Cl | 3.378911  | -1.817677 | 0.370923  |
| C  | 3.701885  | 0.852752  | 0.174339  |
| H  | 4.741027  | 0.647687  | 0.408104  |
| H  | -0.017385 | 1.492748  | -0.653321 |

|   |           |           |           |
|---|-----------|-----------|-----------|
| N | 0.580366  | -1.115573 | -0.302692 |
| N | -0.634564 | -0.860223 | -0.265196 |
| C | -1.924405 | -0.615138 | -0.181770 |
| C | -2.575287 | 0.564634  | 0.250486  |
| C | -3.023325 | -1.493374 | -0.476274 |
| N | -4.185152 | -0.919461 | -0.257605 |
| N | -3.884953 | 0.322560  | 0.206194  |
| C | -4.970581 | 1.183496  | 0.607821  |
| H | -4.572005 | 2.165922  | 0.862186  |
| H | -5.681162 | 1.276338  | -0.215558 |
| H | -5.482931 | 0.758950  | 1.474601  |
| H | -2.167159 | 1.499790  | 0.606552  |
| H | -2.966970 | -2.503372 | -0.860139 |
| H | 3.968544  | 2.974202  | 0.010344  |

24

4pzHCl1B-ts-H-n ; E = -1064.73140827 Hartree

|    |           |           |           |
|----|-----------|-----------|-----------|
| C  | 1.237515  | 1.403490  | 0.275485  |
| C  | 2.258989  | 2.338255  | 0.215536  |
| C  | 1.500631  | 0.038361  | 0.149418  |
| H  | 2.037882  | 3.395713  | 0.325050  |
| C  | 3.572677  | 1.913052  | 0.020647  |
| C  | 2.825194  | -0.373181 | -0.029812 |
| Cl | 3.208265  | -2.058511 | -0.188870 |
| C  | 3.856576  | 0.557830  | -0.103893 |
| H  | 4.872981  | 0.211870  | -0.257910 |
| H  | 0.206649  | 1.703289  | 0.440827  |
| N  | 0.488746  | -0.978618 | 0.260513  |
| N  | -0.682854 | -0.577936 | 0.158426  |
| C  | -1.927295 | -0.177181 | 0.008939  |
| C  | -3.099849 | -0.925019 | 0.262769  |
| C  | -2.449438 | 1.083034  | -0.447938 |
| N  | -3.763750 | 1.092577  | -0.471296 |
| N  | -4.133984 | -0.133738 | -0.015691 |
| C  | -5.542026 | -0.413785 | 0.127360  |
| H  | -5.670165 | -1.456134 | 0.419899  |
| H  | -5.976229 | 0.238252  | 0.889005  |
| H  | -6.044998 | -0.233924 | -0.824601 |
| H  | -3.212817 | -1.933111 | 0.634556  |
| H  | -1.890078 | 1.947921  | -0.780756 |
| H  | 4.381299  | 2.635686  | -0.030010 |

24

4pzHCl2-ts-B-m ; E = -1524.17686965 Hartree

|    |           |           |           |
|----|-----------|-----------|-----------|
| C  | 2.245300  | -1.029455 | 0.194695  |
| C  | 3.442381  | -0.693576 | 0.799670  |
| C  | 1.360763  | -0.034458 | -0.302741 |
| H  | 4.075067  | -1.493972 | 1.168322  |
| C  | 3.831048  | 0.638471  | 0.917700  |
| C  | 1.771618  | 1.315889  | -0.133102 |
| Cl | 0.686173  | 2.557176  | -0.682134 |
| C  | 2.986608  | 1.638151  | 0.443031  |
| H  | 3.255816  | 2.685501  | 0.529584  |
| Cl | 1.757154  | -2.687988 | 0.046076  |
| N  | 0.221609  | -0.338628 | -0.879988 |
| N  | -0.830743 | -0.583503 | -1.457251 |
| C  | -2.004110 | -0.402913 | -0.721534 |
| C  | -2.203771 | 0.091650  | 0.565893  |
| C  | -3.299859 | -0.694875 | -1.201424 |
| N  | -4.218802 | -0.411331 | -0.295206 |

|   |           |           |           |
|---|-----------|-----------|-----------|
| N | -3.527347 | 0.065038  | 0.763246  |
| C | -4.256510 | 0.485918  | 1.936139  |
| H | -3.548007 | 0.826426  | 2.691282  |
| H | -4.935271 | 1.300207  | 1.674464  |
| H | -4.836518 | -0.352557 | 2.326620  |
| H | -1.504867 | 0.454031  | 1.304963  |
| H | -3.575009 | -1.099667 | -2.165322 |
| H | 4.778394  | 0.893994  | 1.377493  |

24

4pzHCl2-ts-B-n ; E = -1524.17720122 Hartree

|    |           |           |           |
|----|-----------|-----------|-----------|
| C  | 2.121249  | -1.204834 | 0.007557  |
| C  | 3.398293  | -1.191845 | 0.537721  |
| C  | 1.428846  | -0.000794 | -0.289102 |
| H  | 3.879525  | -2.142192 | 0.742965  |
| C  | 4.045886  | 0.011713  | 0.802011  |
| C  | 2.111370  | 1.209869  | 0.003642  |
| Cl | 1.278958  | 2.700365  | -0.315862 |
| C  | 3.388827  | 1.209065  | 0.532994  |
| H  | 3.862535  | 2.163986  | 0.734493  |
| Cl | 1.301039  | -2.703274 | -0.307122 |
| N  | 0.220887  | -0.006440 | -0.805623 |
| N  | -0.895189 | -0.010129 | -1.306677 |
| C  | -1.976562 | -0.005269 | -0.422396 |
| C  | -3.297688 | -0.009762 | -0.850509 |
| C  | -2.053299 | 0.004781  | 0.992900  |
| N  | -3.310613 | 0.006302  | 1.393447  |
| N  | -4.047195 | -0.002690 | 0.259808  |
| C  | -5.486522 | -0.003194 | 0.364638  |
| H  | -5.815673 | -0.888660 | 0.912233  |
| H  | -5.817594 | 0.890839  | 0.896970  |
| H  | -5.914925 | -0.012265 | -0.637790 |
| H  | -3.714815 | -0.017402 | -1.846502 |
| H  | -1.244130 | 0.010982  | 1.709725  |
| H  | 5.047506  | 0.016477  | 1.215241  |

24

4pzHCl2-ts-H-m ; E = -1524.16381404 Hartree

|    |           |           |           |
|----|-----------|-----------|-----------|
| C  | 1.360627  | 1.294392  | -0.271748 |
| C  | 2.369061  | 2.129535  | 0.198354  |
| C  | 1.493856  | -0.098047 | -0.263990 |
| H  | 2.230452  | 3.204414  | 0.158183  |
| C  | 3.538758  | 1.574881  | 0.700359  |
| C  | 2.696984  | -0.619729 | 0.228840  |
| Cl | 2.919413  | -2.341098 | 0.265973  |
| C  | 3.707103  | 0.194677  | 0.721254  |
| H  | 4.611831  | -0.255776 | 1.113797  |
| Cl | -0.063385 | 2.051283  | -0.933628 |
| N  | 0.560869  | -1.041281 | -0.836513 |
| N  | -0.635452 | -0.851804 | -0.579013 |
| C  | -1.909529 | -0.708231 | -0.296397 |
| C  | -2.507282 | 0.223033  | 0.585654  |
| C  | -3.035767 | -1.452155 | -0.789563 |
| N  | -4.166559 | -1.029363 | -0.273755 |
| N  | -3.814869 | -0.015029 | 0.566527  |
| C  | -4.860141 | 0.650756  | 1.305162  |
| H  | -4.418021 | 1.435952  | 1.918711  |
| H  | -5.578697 | 1.087929  | 0.608752  |
| H  | -5.375690 | -0.070140 | 1.943374  |
| H  | -2.058236 | 0.995799  | 1.192063  |

|                                             |           |           |           |
|---------------------------------------------|-----------|-----------|-----------|
| H                                           | -3.021761 | -2.265479 | -1.503010 |
| H                                           | 4.327687  | 2.221813  | 1.070011  |
| 24                                          |           |           |           |
| 4pzHCl2-ts-H-n ; E = -1524.16349670 Hartree |           |           |           |
| C                                           | 1.547114  | 1.274034  | -0.193188 |
| C                                           | 2.678267  | 1.957106  | 0.241694  |
| C                                           | 1.515931  | -0.122729 | -0.266405 |
| H                                           | 2.665530  | 3.041145  | 0.269460  |
| C                                           | 3.805667  | 1.242528  | 0.624626  |
| C                                           | 2.679071  | -0.808087 | 0.104980  |
| Cl                                          | 2.696645  | -2.543189 | 0.034700  |
| C                                           | 3.810730  | -0.146478 | 0.560960  |
| H                                           | 4.680471  | -0.720471 | 0.860261  |
| Cl                                          | 0.181048  | 2.225258  | -0.705829 |
| N                                           | 0.437895  | -0.911973 | -0.815640 |
| N                                           | -0.703605 | -0.606578 | -0.444968 |
| C                                           | -1.927026 | -0.340400 | -0.047915 |
| C                                           | -3.129147 | -0.919702 | -0.514806 |
| C                                           | -2.384270 | 0.587010  | 0.951485  |
| N                                           | -3.691365 | 0.565670  | 1.077203  |
| N                                           | -4.120135 | -0.352863 | 0.166181  |
| C                                           | -5.538975 | -0.587033 | 0.050824  |
| H                                           | -5.713241 | -1.359549 | -0.698375 |
| H                                           | -5.934856 | -0.912402 | 1.015038  |
| H                                           | -6.041126 | 0.335881  | -0.247449 |
| H                                           | -3.290273 | -1.669816 | -1.275564 |
| H                                           | -1.779890 | 1.241373  | 1.565014  |
| H                                           | 4.688891  | 1.771382  | 0.967861  |
| 24                                          |           |           |           |
| 4pzHF1A-ts-B-m ; E = -704.442254488 Hartree |           |           |           |
| C                                           | 1.965486  | 0.713724  | 0.545500  |
| C                                           | 3.179529  | 1.320925  | 0.325947  |
| C                                           | 1.666938  | -0.590126 | 0.075339  |
| H                                           | 3.346598  | 2.311584  | 0.736463  |
| C                                           | 4.142437  | 0.671658  | -0.450596 |
| C                                           | 2.666238  | -1.236603 | -0.691706 |
| H                                           | 2.458578  | -2.229501 | -1.074297 |
| C                                           | 3.862178  | -0.590628 | -0.969239 |
| H                                           | 4.601507  | -1.100286 | -1.579871 |
| F                                           | 0.997796  | 1.345961  | 1.239007  |
| N                                           | 0.490305  | -1.127305 | 0.337869  |
| N                                           | -0.588415 | -1.640119 | 0.636188  |
| C                                           | -1.729592 | -0.913896 | 0.255815  |
| C                                           | -1.849761 | 0.398486  | -0.190802 |
| C                                           | -3.053152 | -1.401781 | 0.299144  |
| N                                           | -3.916542 | -0.480443 | -0.097420 |
| N                                           | -3.162069 | 0.601024  | -0.381544 |
| C                                           | -3.817484 | 1.816765  | -0.799299 |
| H                                           | -4.436606 | 2.206686  | 0.012066  |
| H                                           | -3.060311 | 2.553489  | -1.068497 |
| H                                           | -4.450957 | 1.609017  | -1.663646 |
| H                                           | -1.104633 | 1.167739  | -0.326446 |
| H                                           | -3.389596 | -2.386847 | 0.591273  |
| H                                           | 5.095396  | 1.151235  | -0.644383 |
| 24                                          |           |           |           |
| 4pzHF1A-ts-B-n ; E = -704.442262177 Hartree |           |           |           |
| C                                           | 2.166784  | 0.802933  | 0.375208  |
| C                                           | 3.438577  | 1.223664  | 0.064565  |

|   |           |           |           |
|---|-----------|-----------|-----------|
| C | 1.740406  | -0.535499 | 0.183665  |
| H | 3.703208  | 2.258149  | 0.258413  |
| C | 4.335052  | 0.330957  | -0.528259 |
| C | 2.672569  | -1.428758 | -0.396189 |
| H | 2.366745  | -2.455306 | -0.563532 |
| C | 3.930866  | -0.979544 | -0.770886 |
| H | 4.617542  | -1.679870 | -1.237055 |
| F | 1.268459  | 1.657367  | 0.897548  |
| N | 0.513008  | -0.884724 | 0.522452  |
| N | -0.613694 | -1.201946 | 0.901138  |
| C | -1.672515 | -0.497179 | 0.304483  |
| C | -3.008125 | -0.824752 | 0.486066  |
| C | -1.691604 | 0.643267  | -0.535295 |
| N | -2.931293 | 0.982606  | -0.842570 |
| N | -3.712408 | 0.076248  | -0.218374 |
| C | -5.143175 | 0.156855  | -0.381321 |
| H | -5.415866 | -0.041252 | -1.420746 |
| H | -5.616299 | -0.581491 | 0.266676  |
| H | -5.485069 | 1.156574  | -0.107016 |
| H | -3.469183 | -1.620471 | 1.051884  |
| H | -0.852197 | 1.228685  | -0.882577 |
| H | 5.332676  | 0.661742  | -0.794721 |

24

4pzHF1A-ts-H-m ; E = -704.438089288 Hartree

|   |           |           |           |
|---|-----------|-----------|-----------|
| C | 1.808935  | -0.719833 | -0.258335 |
| C | 2.927251  | -1.531346 | -0.163935 |
| C | 1.872305  | 0.658711  | -0.026086 |
| H | 2.819842  | -2.592634 | -0.363276 |
| C | 4.155405  | -0.968212 | 0.171003  |
| C | 3.122940  | 1.199126  | 0.283487  |
| H | 3.159923  | 2.273539  | 0.439492  |
| C | 4.254452  | 0.403245  | 0.395029  |
| H | 5.210980  | 0.848317  | 0.649633  |
| F | 0.647928  | -1.300701 | -0.612583 |
| N | 0.810183  | 1.626320  | -0.108280 |
| N | -0.351413 | 1.183520  | -0.092022 |
| C | -1.595765 | 0.767118  | -0.054021 |
| C | -2.071020 | -0.542479 | 0.195321  |
| C | -2.809575 | 1.517662  | -0.230499 |
| N | -3.878039 | 0.763193  | -0.108089 |
| N | -3.400179 | -0.482350 | 0.165729  |
| C | -4.351138 | -1.541857 | 0.395660  |
| H | -4.955300 | -1.314043 | 1.277032  |
| H | -5.008481 | -1.636474 | -0.471079 |
| H | -3.812007 | -2.476570 | 0.551505  |
| H | -1.525593 | -1.452703 | 0.391873  |
| H | -2.900076 | 2.572273  | -0.455348 |
| H | 5.032753  | -1.602998 | 0.246309  |

24

4pzHF1A-ts-H-n ; E = -704.437401756 Hartree

|   |          |           |           |
|---|----------|-----------|-----------|
| C | 1.973090 | -0.713538 | 0.211449  |
| C | 3.184811 | -1.377297 | 0.111185  |
| C | 1.877717 | 0.675285  | 0.064434  |
| H | 3.200472 | -2.454550 | 0.240621  |
| C | 4.344992 | -0.651187 | -0.142146 |
| C | 3.062005 | 1.380580  | -0.163307 |
| H | 2.973434 | 2.459589  | -0.252567 |
| C | 4.284518 | 0.733994  | -0.279204 |



|   |           |           |           |
|---|-----------|-----------|-----------|
| H | 5.187546  | 1.305007  | -0.469876 |
| F | 0.882100  | -1.446511 | 0.485220  |
| N | 0.704111  | 1.499728  | 0.166996  |
| N | -0.394506 | 0.923808  | 0.079943  |
| C | -1.577950 | 0.365803  | -0.033292 |
| C | -2.839825 | 0.965780  | 0.184535  |
| C | -1.926291 | -0.977925 | -0.412826 |
| N | -3.227578 | -1.162154 | -0.428576 |
| N | -3.759116 | 0.030027  | -0.042858 |
| C | -5.192035 | 0.129486  | 0.084092  |
| H | -5.458017 | 1.157012  | 0.333442  |
| H | -5.661108 | -0.153112 | -0.860475 |
| H | -5.543593 | -0.542509 | 0.870691  |
| H | -3.088155 | 1.969375  | 0.498381  |
| H | -1.250719 | -1.777079 | -0.682629 |
| H | 5.294671  | -1.170873 | -0.222621 |

24

4pzHF1B-ts-B-m ; E = -704.442254493 Hartree

|   |           |           |           |
|---|-----------|-----------|-----------|
| C | -2.666346 | -1.236625 | -0.691575 |
| C | -3.862252 | -0.590583 | -0.969095 |
| C | -1.666953 | -0.590160 | 0.075356  |
| H | -4.601651 | -1.100231 | -1.579651 |
| C | -4.142389 | 0.671763  | -0.450536 |
| C | -1.965385 | 0.713747  | 0.545441  |
| F | -0.997647 | 1.345940  | 1.238813  |
| C | -3.179399 | 1.321016  | 0.325919  |
| H | -3.346375 | 2.311710  | 0.736386  |
| H | -2.458786 | -2.229575 | -1.074084 |
| N | -0.490343 | -1.127410 | 0.337845  |
| N | 0.588405  | -1.640184 | 0.636132  |
| C | 1.729563  | -0.913952 | 0.255712  |
| C | 1.849727  | 0.398483  | -0.190750 |
| C | 3.053127  | -1.401836 | 0.298998  |
| N | 3.916512  | -0.480451 | -0.097463 |
| N | 3.162036  | 0.601049  | -0.381458 |
| C | 3.817435  | 1.816822  | -0.799146 |
| H | 4.451826  | 1.608809  | -1.662747 |
| H | 3.060274  | 2.553140  | -1.069490 |
| H | 4.435625  | 2.207411  | 0.012615  |
| H | 1.104613  | 1.167725  | -0.326379 |
| H | 3.389583  | -2.386924 | 0.591001  |
| H | -5.095322 | 1.151399  | -0.644313 |

24

4pzHF1B-ts-B-n ; E = -704.442262211 Hartree

|   |           |           |           |
|---|-----------|-----------|-----------|
| C | -2.673023 | -1.428719 | -0.395950 |
| C | -3.931219 | -0.979209 | -0.770633 |
| C | -1.740495 | -0.535616 | 0.183557  |
| H | -4.618152 | -1.679398 | -1.236627 |
| C | -4.334997 | 0.331442  | -0.528118 |
| C | -2.166548 | 0.802917  | 0.375179  |
| F | -1.268081 | 1.657105  | 0.897772  |
| C | -3.438273 | 1.223944  | 0.064636  |
| H | -3.702667 | 2.258484  | 0.258511  |
| H | -2.367503 | -2.455386 | -0.563122 |
| N | -0.513067 | -0.885058 | 0.522031  |
| N | 0.613698  | -1.202572 | 0.900354  |
| C | 1.672474  | -0.497474 | 0.304047  |
| C | 3.008086  | -0.825014 | 0.485695  |

|   |           |           |           |
|---|-----------|-----------|-----------|
| C | 1.691594  | 0.643338  | -0.535236 |
| N | 2.931305  | 0.982922  | -0.842159 |
| N | 3.712407  | 0.076385  | -0.218195 |
| C | 5.143187  | 0.157048  | -0.381017 |
| H | 5.484850  | 1.156995  | -0.107273 |
| H | 5.616361  | -0.580822 | 0.267494  |
| H | 5.416045  | -0.041640 | -1.420290 |
| H | 3.469065  | -1.621026 | 1.051255  |
| H | 0.852160  | 1.228689  | -0.882527 |
| H | -5.332546 | 0.662484  | -0.794546 |

24

4pzHF1B-ts-H-m ; E = -704.436550574 Hartree

|   |           |           |           |
|---|-----------|-----------|-----------|
| C | 1.396485  | 1.051566  | -0.361079 |
| C | 2.389513  | 2.020321  | -0.368594 |
| C | 1.694861  | -0.282927 | -0.079183 |
| H | 2.143649  | 3.052253  | -0.599951 |
| C | 3.708372  | 1.662754  | -0.086382 |
| C | 3.025742  | -0.617498 | 0.182817  |
| F | 3.343632  | -1.886035 | 0.446866  |
| C | 4.030271  | 0.338571  | 0.192075  |
| H | 5.045916  | 0.030016  | 0.415219  |
| H | 0.364885  | 1.298494  | -0.594975 |
| N | 0.738956  | -1.357562 | -0.099898 |
| N | -0.451471 | -1.000991 | -0.124241 |
| C | -1.717959 | -0.645321 | -0.114403 |
| C | -2.283891 | 0.603926  | 0.232597  |
| C | -2.874185 | -1.442177 | -0.420885 |
| N | -3.991486 | -0.762486 | -0.285394 |
| N | -3.608102 | 0.468113  | 0.141530  |
| C | -4.631910 | 1.426577  | 0.478431  |
| H | -4.169690 | 2.399607  | 0.647403  |
| H | -5.342297 | 1.495303  | -0.347096 |
| H | -5.162889 | 1.110933  | 1.380336  |
| H | -1.814640 | 1.516654  | 0.570978  |
| H | -2.887557 | -2.468468 | -0.763101 |
| H | 4.490862  | 2.415254  | -0.086961 |

24

4pzHF1B-ts-H-n ; E = -704.437144932 Hartree

|   |           |           |           |
|---|-----------|-----------|-----------|
| C | -1.581293 | 1.098071  | 0.240951  |
| C | -2.684409 | 1.939119  | 0.242372  |
| C | -1.728076 | -0.280428 | 0.076504  |
| H | -2.554428 | 3.008274  | 0.379176  |
| C | -3.962898 | 1.405990  | 0.074290  |
| C | -3.019984 | -0.790592 | -0.074139 |
| F | -3.193370 | -2.105340 | -0.225106 |
| C | -4.134113 | 0.035018  | -0.085890 |
| H | -5.114751 | -0.409015 | -0.218990 |
| H | -0.576662 | 1.484905  | 0.384338  |
| N | -0.649200 | -1.231141 | 0.107247  |
| N | 0.490899  | -0.737920 | 0.051557  |
| C | 1.703703  | -0.235906 | -0.042599 |
| C | 2.924412  | -0.898644 | 0.218746  |
| C | 2.136572  | 1.079605  | -0.432027 |
| N | 3.446726  | 1.193216  | -0.414208 |
| N | 3.900153  | -0.015019 | 0.009463  |
| C | 5.318925  | -0.182940 | 0.208658  |
| H | 5.656463  | 0.431641  | 1.047062  |
| H | 5.528459  | -1.232602 | 0.415985  |

|   |           |           |           |
|---|-----------|-----------|-----------|
| H | 5.847099  | 0.126238  | -0.694959 |
| H | 3.107405  | -1.907997 | 0.557625  |
| H | 1.520641  | 1.908967  | -0.755300 |
| H | -4.830976 | 2.057939  | 0.071402  |

24

4pzHF2-ts-B-m ; E = -803.582855184 Hartree

|   |           |           |           |
|---|-----------|-----------|-----------|
| C | -2.610755 | 0.943882  | 0.357243  |
| C | -3.788500 | 0.301340  | 0.677541  |
| C | -1.505973 | 0.266089  | -0.220757 |
| H | -4.582973 | 0.877433  | 1.139123  |
| C | -3.947297 | -1.049113 | 0.366007  |
| C | -1.705363 | -1.116540 | -0.463235 |
| F | -0.664446 | -1.790089 | -0.983781 |
| C | -2.900629 | -1.759034 | -0.221812 |
| H | -2.988258 | -2.811994 | -0.466337 |
| F | -2.448305 | 2.238896  | 0.640213  |
| N | -0.372672 | 0.866293  | -0.510919 |
| N | 0.672943  | 1.446981  | -0.814345 |
| C | 1.855875  | 0.838672  | -0.368160 |
| C | 2.070672  | -0.414851 | 0.198170  |
| C | 3.139055  | 1.423003  | -0.442901 |
| N | 4.064831  | 0.611572  | 0.042063  |
| N | 3.391445  | -0.495701 | 0.417436  |
| C | 4.131693  | -1.610663 | 0.956645  |
| H | 4.715971  | -1.278084 | 1.816770  |
| H | 3.430161  | -2.385080 | 1.267561  |
| H | 4.808540  | -2.011611 | 0.198616  |
| H | 1.385437  | -1.223904 | 0.400675  |
| H | 3.401970  | 2.401338  | -0.820456 |
| H | -4.884609 | -1.548093 | 0.584070  |

24

4pzHF2-ts-B-n ; E = -803.583037222 Hartree

|   |           |           |           |
|---|-----------|-----------|-----------|
| C | -2.611874 | -1.096190 | -0.202830 |
| C | -3.861115 | -0.640600 | -0.569404 |
| C | -1.582427 | -0.224985 | 0.236930  |
| H | -4.591608 | -1.360495 | -0.921910 |
| C | -4.167863 | 0.714081  | -0.441627 |
| C | -1.933680 | 1.147216  | 0.297036  |
| F | -0.971541 | 1.995416  | 0.691608  |
| C | -3.199650 | 1.610819  | 0.009350  |
| H | -3.402833 | 2.671380  | 0.109612  |
| F | -2.306164 | -2.392815 | -0.309768 |
| N | -0.382755 | -0.650263 | 0.568536  |
| N | 0.727049  | -1.059863 | 0.917185  |
| C | 1.823101  | -0.408319 | 0.331595  |
| C | 3.134272  | -0.835037 | 0.487919  |
| C | 1.915938  | 0.749045  | -0.480759 |
| N | 3.173533  | 1.006629  | -0.794341 |
| N | 3.894100  | 0.030929  | -0.202076 |
| C | 5.324652  | 0.010552  | -0.383885 |
| H | 5.740666  | 0.979461  | -0.101709 |
| H | 5.751797  | -0.768503 | 0.248202  |
| H | 5.569311  | -0.192474 | -1.429388 |
| H | 3.542006  | -1.677353 | 1.026683  |
| H | 1.117602  | 1.402262  | -0.802378 |
| H | -5.159214 | 1.070815  | -0.696742 |

24

4pzHF2-ts-H-m ; E = -803.577850517 Hartree

|   |           |           |           |
|---|-----------|-----------|-----------|
| C | 1.508363  | 1.013490  | 0.313157  |
| C | 2.546685  | 1.918377  | 0.165897  |
| C | 1.667046  | -0.364268 | 0.123769  |
| H | 2.355163  | 2.971444  | 0.339789  |
| C | 3.806946  | 1.446147  | -0.186767 |
| C | 2.959693  | -0.788217 | -0.209297 |
| F | 3.168951  | -2.091788 | -0.391700 |
| C | 4.021407  | 0.085378  | -0.378855 |
| H | 4.991649  | -0.311652 | -0.654474 |
| F | 0.310077  | 1.495692  | 0.683310  |
| N | 0.684819  | -1.399089 | 0.319238  |
| N | -0.501894 | -1.041633 | 0.223794  |
| C | -1.770522 | -0.723692 | 0.118429  |
| C | -2.327633 | 0.526382  | -0.243655 |
| C | -2.934104 | -1.544067 | 0.321154  |
| N | -4.047446 | -0.880351 | 0.109846  |
| N | -3.648940 | 0.375469  | -0.238313 |
| C | -4.665474 | 1.350347  | -0.549149 |
| H | -5.324793 | 1.479859  | 0.311758  |
| H | -4.186498 | 2.299281  | -0.791343 |
| H | -5.256530 | 1.007815  | -1.401470 |
| H | -1.841087 | 1.458738  | -0.486701 |
| H | -2.957916 | -2.584938 | 0.616231  |
| H | 4.628544  | 2.144284  | -0.308329 |

24

4pzHF2-ts-H-n ; E = -803.577403869 Hartree

|   |           |           |           |
|---|-----------|-----------|-----------|
| C | 1.700008  | 1.020389  | -0.248435 |
| C | 2.851501  | 1.772585  | -0.082370 |
| C | 1.684559  | -0.375674 | -0.143709 |
| H | 2.794171  | 2.850308  | -0.187125 |
| C | 4.047430  | 1.121199  | 0.202027  |
| C | 2.918181  | -0.982751 | 0.121195  |
| F | 2.959458  | -2.312019 | 0.219749  |
| C | 4.088320  | -0.265261 | 0.307445  |
| H | 5.005152  | -0.799576 | 0.528551  |
| F | 0.567520  | 1.670660  | -0.552687 |
| N | 0.571065  | -1.257840 | -0.372500 |
| N | -0.555742 | -0.760386 | -0.203099 |
| C | -1.768853 | -0.292293 | -0.022926 |
| C | -2.996114 | -0.956271 | -0.254878 |
| C | -2.190563 | 0.994703  | 0.463611  |
| N | -3.499363 | 1.093066  | 0.522004  |
| N | -3.964996 | -0.105606 | 0.072197  |
| C | -5.392428 | -0.300624 | 0.005330  |
| H | -5.826999 | -0.169651 | 0.998618  |
| H | -5.832895 | 0.431623  | -0.675012 |
| H | -5.598303 | -1.308419 | -0.355990 |
| H | -3.188689 | -1.951753 | -0.628261 |
| H | -1.559594 | 1.819721  | 0.762909  |
| H | 4.955353  | 1.699321  | 0.338792  |

28

4pzHOMe1A-ts-B-m ; E = -719.702897244 Hartree

|   |          |           |           |
|---|----------|-----------|-----------|
| C | 1.912059 | -0.545617 | -0.248393 |
| C | 3.152519 | -0.982275 | 0.181542  |
| C | 1.553983 | 0.833529  | -0.135408 |
| H | 3.424408 | -2.027313 | 0.078309  |
| C | 4.045122 | -0.092719 | 0.790984  |
| C | 2.483028 | 1.718799  | 0.452137  |

|   |           |           |           |
|---|-----------|-----------|-----------|
| C | 3.693493  | 1.242987  | 0.939944  |
| H | 4.379847  | 1.937775  | 1.414627  |
| N | 0.363054  | 1.221627  | -0.554874 |
| N | -0.725798 | 1.572946  | -1.007679 |
| C | -1.848158 | 0.929647  | -0.455181 |
| C | -1.928392 | -0.162195 | 0.402452  |
| C | -3.189665 | 1.286739  | -0.708155 |
| N | -4.028857 | 0.493216  | -0.060761 |
| N | -3.238710 | -0.377005 | 0.600686  |
| C | -3.854884 | -1.416706 | 1.387908  |
| H | -4.540599 | -0.969294 | 2.110041  |
| H | -4.413347 | -2.097471 | 0.740821  |
| H | -3.077492 | -1.969331 | 1.916186  |
| H | -1.152351 | -0.781551 | 0.825808  |
| H | -3.557054 | 2.093037  | -1.327745 |
| H | 5.006537  | -0.454017 | 1.139905  |
| H | 2.210866  | 2.764685  | 0.538942  |
| O | 0.942800  | -1.322252 | -0.807201 |
| C | 1.253299  | -2.676585 | -1.029586 |
| H | 2.110616  | -2.784513 | -1.705776 |
| H | 1.473026  | -3.203480 | -0.091278 |
| H | 0.370919  | -3.119612 | -1.493301 |

28

4pzHOMe1A-ts-B-n ; E = -719.703154772 Hartree

|   |           |           |           |
|---|-----------|-----------|-----------|
| C | 2.070680  | 0.551147  | 0.163915  |
| C | 3.361526  | 0.825374  | -0.252485 |
| C | 1.611751  | -0.800148 | 0.241383  |
| H | 3.709032  | 1.851897  | -0.297059 |
| C | 4.209830  | -0.210468 | -0.661272 |
| C | 2.496317  | -1.830925 | -0.140143 |
| C | 3.763313  | -1.525176 | -0.621391 |
| H | 4.415465  | -2.332724 | -0.940266 |
| N | 0.372569  | -1.031335 | 0.638160  |
| N | -0.762024 | -1.221581 | 1.074306  |
| C | -1.797316 | -0.592560 | 0.358642  |
| C | -3.142719 | -0.793124 | 0.627293  |
| C | -1.778420 | 0.340371  | -0.706477 |
| N | -3.006278 | 0.682244  | -1.058942 |
| N | -3.817651 | -0.018769 | -0.239904 |
| C | -5.245530 | 0.105081  | -0.395863 |
| H | -5.523037 | 1.160533  | -0.373275 |
| H | -5.562462 | -0.326646 | -1.348701 |
| H | -5.739214 | -0.419301 | 0.422960  |
| H | -3.630647 | -1.420897 | 1.357998  |
| H | -0.916465 | 0.778074  | -1.188836 |
| H | 5.211959  | 0.022907  | -1.004809 |
| H | 2.146394  | -2.855476 | -0.081512 |
| O | 1.141658  | 1.469370  | 0.541216  |
| C | 1.522771  | 2.823521  | 0.506139  |
| H | 2.353750  | 3.024093  | 1.194385  |
| H | 1.814463  | 3.136294  | -0.505125 |
| H | 0.647982  | 3.393816  | 0.820712  |

28

4pzHOMe1A-ts-H-m ; E = -719.695229731 Hartree

|   |          |           |           |
|---|----------|-----------|-----------|
| C | 2.737636 | -0.215014 | 0.064599  |
| C | 3.624139 | 0.865362  | 0.087282  |
| C | 1.365787 | 0.022866  | -0.164122 |
| H | 4.679529 | 0.704997  | 0.273388  |

|   |           |           |           |
|---|-----------|-----------|-----------|
| C | 3.157359  | 2.159044  | -0.129065 |
| C | 0.925005  | 1.325743  | -0.381458 |
| C | 1.807114  | 2.397486  | -0.368576 |
| H | 1.450875  | 3.406777  | -0.550075 |
| N | 0.506893  | -1.127128 | -0.223635 |
| N | -0.710807 | -0.878388 | -0.212969 |
| C | -2.004646 | -0.644397 | -0.169009 |
| C | -2.677748 | 0.493910  | 0.330717  |
| C | -3.086281 | -1.495119 | -0.583479 |
| N | -4.260138 | -0.939629 | -0.370305 |
| N | -3.987742 | 0.250860  | 0.217908  |
| C | -5.087824 | 1.047618  | 0.701242  |
| H | -4.741432 | 2.065087  | 0.886908  |
| H | -5.871274 | 1.059318  | -0.057653 |
| H | -5.492502 | 0.624757  | 1.625398  |
| H | -2.289153 | 1.392052  | 0.788842  |
| H | -3.009987 | -2.461985 | -1.062834 |
| H | 3.862872  | 2.984668  | -0.112856 |
| H | -0.133175 | 1.468920  | -0.582105 |
| O | 3.105201  | -1.497066 | 0.265015  |
| C | 4.470683  | -1.764071 | 0.476943  |
| H | 5.083829  | -1.448347 | -0.377004 |
| H | 4.844132  | -1.275024 | 1.386040  |
| H | 4.549882  | -2.845279 | 0.594392  |

28

4pzHOMe1A-ts-H-n ; E = -719.695612043 Hartree

|   |           |           |           |
|---|-----------|-----------|-----------|
| C | 2.758146  | -0.339807 | 0.001912  |
| C | 3.757695  | 0.636965  | 0.013290  |
| C | 1.409125  | 0.054559  | -0.122673 |
| H | 4.798696  | 0.355632  | 0.119962  |
| C | 3.422947  | 1.982585  | -0.111611 |
| C | 1.101167  | 1.406395  | -0.250145 |
| C | 2.094670  | 2.375663  | -0.247598 |
| H | 1.839909  | 3.425274  | -0.356154 |
| N | 0.428863  | -0.994308 | -0.172740 |
| N | -0.753584 | -0.620791 | -0.080580 |
| C | -2.009453 | -0.251229 | 0.054358  |
| C | -3.162922 | -0.984109 | -0.302550 |
| C | -2.561448 | 0.962007  | 0.595114  |
| N | -3.877731 | 0.957157  | 0.575398  |
| N | -4.217704 | -0.220829 | -0.003896 |
| C | -5.610317 | -0.476403 | -0.276581 |
| H | -5.742824 | -1.534075 | -0.506995 |
| H | -6.195341 | -0.216809 | 0.606862  |
| H | -5.952541 | 0.127948  | -1.121459 |
| H | -3.253318 | -1.953671 | -0.770122 |
| H | -2.022681 | 1.793104  | 1.031743  |
| H | 4.214354  | 2.726453  | -0.105395 |
| H | 0.054637  | 1.672784  | -0.368480 |
| O | 2.995217  | -1.663009 | 0.118632  |
| C | 4.333563  | -2.082783 | 0.231164  |
| H | 4.926399  | -1.791251 | -0.645525 |
| H | 4.810863  | -1.682078 | 1.134898  |
| H | 4.302151  | -3.170911 | 0.296240  |

28

4pzHOMe1B-ts-B-m ; E = -719.702897244 Hartree

|   |          |           |          |
|---|----------|-----------|----------|
| C | 2.482993 | -1.718833 | 0.452121 |
| C | 3.693476 | -1.243083 | 0.939937 |

|   |           |           |           |
|---|-----------|-----------|-----------|
| C | 1.553977  | -0.833516 | -0.135407 |
| H | 4.379801  | -1.937908 | 1.414608  |
| C | 4.045162  | 0.092611  | 0.790996  |
| C | 1.912111  | 0.545619  | -0.248367 |
| C | 3.152595  | 0.982211  | 0.181567  |
| H | 3.424534  | 2.027236  | 0.078342  |
| N | 0.363041  | -1.221571 | -0.554884 |
| N | -0.725811 | -1.572851 | -1.007716 |
| C | -1.848189 | -0.929583 | -0.455211 |
| C | -1.928470 | 0.162240  | 0.402437  |
| C | -3.189682 | -1.286726 | -0.708198 |
| N | -4.028908 | -0.493244 | -0.060799 |
| N | -3.238799 | 0.376997  | 0.600668  |
| C | -3.855007 | 1.416654  | 1.387925  |
| H | -3.077672 | 1.969191  | 1.916386  |
| H | -4.413338 | 2.097509  | 0.740823  |
| H | -4.540849 | 0.969189  | 2.109904  |
| H | -1.152447 | 0.781608  | 0.825803  |
| H | -3.557027 | -2.093022 | -1.327815 |
| H | 5.006594  | 0.453864  | 1.139917  |
| O | 0.942903  | 1.322316  | -0.807173 |
| C | 1.253469  | 2.676642  | -1.029513 |
| H | 1.473240  | 3.203490  | -0.091190 |
| H | 2.110779  | 2.784550  | -1.705715 |
| H | 0.371104  | 3.119732  | -1.493197 |
| H | 2.210788  | -2.764709 | 0.538908  |

28

4pzHOMe1B-ts-B-n ; E = -719.703154772 Hartree

|   |           |           |           |
|---|-----------|-----------|-----------|
| C | 2.496242  | -1.830944 | 0.140081  |
| C | 3.763239  | -1.525271 | 0.621376  |
| C | 1.611727  | -0.800112 | -0.241418 |
| H | 4.415342  | -2.332862 | 0.940244  |
| C | 4.209816  | -0.210586 | 0.661315  |
| C | 2.070723  | 0.551157  | -0.163907 |
| C | 3.361571  | 0.825307  | 0.252536  |
| H | 3.709124  | 1.851813  | 0.297150  |
| N | 0.372555  | -1.031261 | -0.638253 |
| N | -0.762053 | -1.221470 | -1.074373 |
| C | -1.797338 | -0.592494 | -0.358660 |
| C | -3.142735 | -0.792986 | -0.627393 |
| C | -1.778465 | 0.340235  | 0.706634  |
| N | -3.006330 | 0.682072  | 1.059114  |
| N | -3.817685 | -0.018769 | 0.239911  |
| C | -5.245567 | 0.105135  | 0.395797  |
| H | -5.562494 | -0.326283 | 1.348773  |
| H | -5.523109 | 1.160573  | 0.372853  |
| H | -5.739227 | -0.419535 | -0.422856 |
| H | -3.630623 | -1.420628 | -1.358242 |
| H | -0.916516 | 0.777815  | 1.189109  |
| H | 5.211944  | 0.022733  | 1.004895  |
| O | 1.141765  | 1.469436  | -0.541224 |
| C | 1.522950  | 2.823565  | -0.506107 |
| H | 1.814611  | 3.136306  | 0.505176  |
| H | 2.353973  | 3.024103  | -1.194311 |
| H | 0.648207  | 3.393913  | -0.820713 |
| H | 2.146274  | -2.855477 | 0.081406  |

28

4pzHOMe1B-ts-H-m ; E = -719.696239438 Hartree

|   |           |           |           |
|---|-----------|-----------|-----------|
| C | 3.044218  | -1.489500 | 0.281477  |
| C | 4.218738  | -0.767574 | 0.440543  |
| C | 1.824996  | -0.865213 | 0.020941  |
| H | 5.153166  | -1.275540 | 0.655520  |
| C | 4.177821  | 0.616089  | 0.311442  |
| C | 1.795501  | 0.541827  | -0.122485 |
| C | 2.979710  | 1.266736  | 0.025844  |
| H | 2.976779  | 2.345333  | -0.081409 |
| N | 0.736681  | -1.787081 | -0.129571 |
| N | -0.412390 | -1.320156 | -0.122208 |
| C | -1.652755 | -0.896466 | -0.108113 |
| C | -2.152851 | 0.281842  | 0.489026  |
| C | -2.832870 | -1.499478 | -0.664618 |
| N | -3.907706 | -0.772601 | -0.440923 |
| N | -3.477674 | 0.280405  | 0.296078  |
| C | -4.458327 | 1.182045  | 0.845545  |
| H | -5.226384 | 1.359722  | 0.091853  |
| H | -4.926007 | 0.752358  | 1.736798  |
| H | -3.976417 | 2.125213  | 1.107629  |
| H | -1.639979 | 1.039626  | 1.061163  |
| H | -2.890907 | -2.403694 | -1.255809 |
| H | 5.083748  | 1.204475  | 0.423689  |
| O | 0.606310  | 1.118373  | -0.420375 |
| C | 0.600783  | 2.486626  | -0.754996 |
| H | 0.877689  | 3.117993  | 0.099324  |
| H | 1.277771  | 2.700059  | -1.591292 |
| H | -0.423746 | 2.714824  | -1.052503 |
| H | 3.021653  | -2.572928 | 0.356778  |

28

4pzHOMe1B-ts-H-n ; E = -719.696350169 Hartree

|   |           |           |           |
|---|-----------|-----------|-----------|
| C | 2.982965  | -1.647358 | 0.057911  |
| C | 4.232623  | -1.047704 | 0.126214  |
| C | 1.810190  | -0.898844 | -0.034286 |
| H | 5.130323  | -1.651472 | 0.209663  |
| C | 4.313034  | 0.339482  | 0.079450  |
| C | 1.902522  | 0.512203  | -0.094801 |
| C | 3.161275  | 1.114347  | -0.035902 |
| H | 3.252170  | 2.193418  | -0.080424 |
| N | 0.629391  | -1.708565 | -0.109904 |
| N | -0.466216 | -1.139645 | 0.008958  |
| C | -1.653822 | -0.600622 | 0.144925  |
| C | -2.886534 | -1.059539 | -0.366717 |
| C | -2.023462 | 0.604453  | 0.836868  |
| N | -3.318630 | 0.836238  | 0.761857  |
| N | -3.813021 | -0.160238 | -0.009485 |
| C | -5.196026 | -0.103760 | -0.410198 |
| H | -5.784759 | 0.256714  | 0.434014  |
| H | -5.329503 | 0.578034  | -1.255935 |
| H | -5.533301 | -1.102340 | -0.692038 |
| H | -3.110093 | -1.914854 | -0.987154 |
| H | -1.377972 | 1.242331  | 1.423939  |
| H | 5.278732  | 0.834395  | 0.125126  |
| O | 0.752021  | 1.210020  | -0.226454 |
| C | 0.835676  | 2.604743  | -0.408503 |
| H | 1.268413  | 3.104130  | 0.467683  |
| H | 1.427360  | 2.860817  | -1.296192 |
| H | -0.191069 | 2.946454  | -0.544963 |
| H | 2.862212  | -2.726734 | 0.078160  |



32

4pzHOMe2-ts-B-m ; E = -834.104218701 Hartree

|   |           |           |           |
|---|-----------|-----------|-----------|
| C | 2.459090  | -0.733016 | 0.127710  |
| C | 3.568621  | -0.018317 | 0.563238  |
| C | 1.270513  | -0.052180 | -0.270493 |
| H | 4.463810  | -0.539314 | 0.881869  |
| C | 3.547982  | 1.375200  | 0.551185  |
| C | 1.270740  | 1.371988  | -0.220342 |
| C | 2.411815  | 2.073382  | 0.148460  |
| H | 2.415351  | 3.157180  | 0.152754  |
| N | 0.206996  | -0.713830 | -0.676045 |
| N | -0.770610 | -1.348672 | -1.081453 |
| C | -2.006848 | -0.987923 | -0.512836 |
| C | -2.339528 | 0.039536  | 0.363052  |
| C | -3.223054 | -1.665368 | -0.745561 |
| N | -4.221664 | -1.111791 | -0.074144 |
| N | -3.659115 | -0.080444 | 0.587513  |
| C | -4.497917 | 0.768606  | 1.396131  |
| H | -3.868065 | 1.463799  | 1.952131  |
| H | -5.192154 | 1.329077  | 0.764556  |
| H | -5.069883 | 0.155036  | 2.094795  |
| H | -1.731830 | 0.826205  | 0.783469  |
| H | -3.389628 | -2.532794 | -1.369188 |
| H | 4.430710  | 1.924750  | 0.860814  |
| O | 0.093590  | 1.935832  | -0.601243 |
| C | 0.044496  | 3.340519  | -0.677961 |
| H | 0.231813  | 3.809408  | 0.297150  |
| H | 0.770822  | 3.726732  | -1.403670 |
| H | -0.963854 | 3.591063  | -1.010333 |
| O | 2.363490  | -2.080638 | 0.084137  |
| C | 3.495362  | -2.822868 | 0.468257  |
| H | 4.364655  | -2.590517 | -0.160545 |
| H | 3.757039  | -2.644437 | 1.519298  |
| H | 3.227693  | -3.871932 | 0.337599  |

32

4pzHOMe2-ts-B-n ; E = -834.104481023 Hartree

|   |           |           |           |
|---|-----------|-----------|-----------|
| C | 1.515693  | -1.336015 | -0.138122 |
| C | 2.753201  | -1.872702 | 0.195324  |
| C | 1.335822  | 0.073452  | -0.248405 |
| H | 2.891580  | -2.946262 | 0.248523  |
| C | 3.812427  | -1.020815 | 0.500159  |
| C | 2.449771  | 0.913871  | 0.045101  |
| C | 3.661199  | 0.363519  | 0.447396  |
| H | 4.499987  | 1.005005  | 0.690732  |
| N | 0.176008  | 0.577406  | -0.616268 |
| N | -0.895542 | 1.057316  | -0.996329 |
| C | -2.043494 | 0.566003  | -0.345091 |
| C | -3.318485 | 1.055145  | -0.584703 |
| C | -2.226585 | -0.443282 | 0.631676  |
| N | -3.503110 | -0.564340 | 0.958568  |
| N | -4.147644 | 0.353740  | 0.209589  |
| C | -5.570849 | 0.513908  | 0.369007  |
| H | -6.051007 | -0.464865 | 0.318498  |
| H | -5.800276 | 0.973738  | 1.334294  |
| H | -5.950175 | 1.147492  | -0.433651 |
| H | -3.661381 | 1.832506  | -1.251198 |
| H | -1.474577 | -1.084696 | 1.067242  |
| H | 4.771098  | -1.441970 | 0.784467  |

|   |           |           |           |
|---|-----------|-----------|-----------|
| O | 2.185805  | 2.236502  | -0.052901 |
| C | 3.234475  | 3.128326  | 0.236515  |
| H | 3.567944  | 3.034657  | 1.278172  |
| H | 4.094033  | 2.973097  | -0.428525 |
| H | 2.833143  | 4.129710  | 0.076448  |
| O | 0.402548  | -2.054660 | -0.430020 |
| C | 0.502802  | -3.457892 | -0.376562 |
| H | 1.225028  | -3.835877 | -1.111018 |
| H | 0.793756  | -3.806391 | 0.622893  |
| H | -0.489834 | -3.840830 | -0.616202 |

32

4pzHOMe2-ts-H-m ; E = -834.094683432 Hartree

|   |           |           |           |
|---|-----------|-----------|-----------|
| C | 2.769949  | -0.535318 | 0.118666  |
| C | 3.749239  | 0.434845  | 0.337763  |
| C | 1.427206  | -0.167790 | -0.123758 |
| H | 4.775263  | 0.154147  | 0.539070  |
| C | 3.394158  | 1.777451  | 0.299676  |
| C | 1.101455  | 1.205634  | -0.155867 |
| C | 2.087338  | 2.174406  | 0.052054  |
| H | 1.842340  | 3.228901  | 0.023507  |
| N | 0.549882  | -1.252917 | -0.435312 |
| N | -0.667486 | -1.042752 | -0.314924 |
| C | -1.965594 | -0.895120 | -0.217105 |
| C | -2.664807 | 0.023681  | 0.596766  |
| C | -3.025487 | -1.604938 | -0.880130 |
| N | -4.213179 | -1.166859 | -0.517432 |
| N | -3.970307 | -0.206346 | 0.408038  |
| C | -5.086842 | 0.360407  | 1.120704  |
| H | -4.794760 | 1.321490  | 1.546960  |
| H | -5.908179 | 0.505457  | 0.417901  |
| H | -5.417589 | -0.307332 | 1.922389  |
| H | -2.289729 | 0.751815  | 1.299861  |
| H | -2.927760 | -2.374425 | -1.634423 |
| H | 4.155574  | 2.533463  | 0.466888  |
| O | -0.188886 | 1.520748  | -0.420183 |
| C | -0.502523 | 2.868436  | -0.681645 |
| H | -0.372045 | 3.498397  | 0.207821  |
| H | 0.106021  | 3.274100  | -1.499146 |
| H | -1.553580 | 2.875547  | -0.973780 |
| O | 3.017635  | -1.861069 | 0.140168  |
| C | 4.347306  | -2.279040 | 0.332325  |
| H | 5.012914  | -1.890749 | -0.449253 |
| H | 4.732022  | -1.973949 | 1.314173  |
| H | 4.328765  | -3.368104 | 0.278866  |

32

4pzHOMe2-ts-H-n ; E = -834.094714688 Hartree

|   |           |           |           |
|---|-----------|-----------|-----------|
| C | 2.765649  | -0.668167 | 0.015691  |
| C | 3.840820  | 0.215278  | 0.125221  |
| C | 1.441168  | -0.187912 | -0.095508 |
| H | 4.854444  | -0.151256 | 0.225951  |
| C | 3.598344  | 1.582954  | 0.108764  |
| C | 1.230963  | 1.209136  | -0.111100 |
| C | 2.311835  | 2.089893  | -0.012035 |
| H | 2.155697  | 3.161299  | -0.027100 |
| N | 0.450238  | -1.198657 | -0.293779 |
| N | -0.731106 | -0.880036 | -0.084094 |
| C | -1.998382 | -0.612445 | 0.115567  |
| C | -3.129005 | -1.228893 | -0.462992 |

|   |           |           |           |
|---|-----------|-----------|-----------|
| C | -2.582307 | 0.394402  | 0.960279  |
| N | -3.899136 | 0.378751  | 0.908173  |
| N | -4.205515 | -0.586081 | 0.008283  |
| C | -5.581448 | -0.751172 | -0.385899 |
| H | -5.721939 | -1.749162 | -0.803847 |
| H | -6.209942 | -0.632538 | 0.497453  |
| H | -5.866984 | -0.001269 | -1.130347 |
| H | -3.194702 | -2.021971 | -1.193278 |
| H | -2.061320 | 1.067713  | 1.626792  |
| H | 4.433900  | 2.271634  | 0.191828  |
| O | -0.045888 | 1.631123  | -0.250480 |
| C | -0.279927 | 3.009942  | -0.417168 |
| H | 0.011429  | 3.582231  | 0.472655  |
| H | 0.252190  | 3.408180  | -1.290073 |
| H | -1.355465 | 3.109104  | -0.568673 |
| O | 2.902377  | -2.010381 | 0.026952  |
| C | 4.204285  | -2.538289 | 0.101670  |
| H | 4.824446  | -2.214195 | -0.743999 |
| H | 4.703460  | -2.259636 | 1.038812  |
| H | 4.089548  | -3.622271 | 0.067021  |

36

4pzHPyrlA-ts-B-m ; E = -816.469106927 Hartree

|   |           |           |           |
|---|-----------|-----------|-----------|
| C | -2.012417 | 0.740450  | 0.043542  |
| C | -2.882837 | 1.836244  | -0.096311 |
| C | -0.609531 | 1.015670  | 0.253267  |
| H | -3.944992 | 1.660531  | -0.222657 |
| C | -2.420083 | 3.143636  | -0.036770 |
| C | -0.171249 | 2.365715  | 0.213098  |
| C | -1.061181 | 3.419836  | 0.124924  |
| H | -0.706266 | 4.444668  | 0.166396  |
| N | 0.236348  | 0.059582  | 0.602798  |
| N | 1.029178  | -0.816968 | 0.993231  |
| C | 2.359998  | -0.671608 | 0.553570  |
| C | 2.942045  | 0.250641  | -0.309200 |
| C | 3.416700  | -1.541218 | 0.900692  |
| N | 4.552067  | -1.187993 | 0.314482  |
| N | 4.237265  | -0.104221 | -0.417835 |
| C | 5.278198  | 0.572407  | -1.150386 |
| H | 5.897191  | 1.174242  | -0.478500 |
| H | 5.906136  | -0.173147 | -1.639999 |
| H | 4.824879  | 1.219613  | -1.902510 |
| H | 2.521358  | 1.090950  | -0.841084 |
| H | 3.376556  | -2.404040 | 1.551089  |
| H | -3.133060 | 3.957840  | -0.128759 |
| C | -2.660224 | -2.751795 | -0.776665 |
| C | -1.656680 | -1.726003 | -0.254064 |
| N | -2.475485 | -0.538834 | -0.016314 |
| C | -3.895813 | -0.828523 | -0.128040 |
| C | -3.956352 | -2.349909 | -0.079117 |
| H | -2.774474 | -2.649987 | -1.861975 |
| H | -1.155625 | -2.075374 | 0.657563  |
| H | -4.456522 | -0.353152 | 0.685627  |
| H | -4.854633 | -2.746870 | -0.558305 |
| H | -0.870537 | -1.502688 | -0.982764 |
| H | -2.350790 | -3.778154 | -0.564855 |
| H | -3.946664 | -2.690093 | 0.962198  |
| H | -4.303208 | -0.448391 | -1.079030 |
| H | 0.891594  | 2.539839  | 0.351803  |

36

4pzHPyrlA-ts-B-n ; E = -816.469678615 Hartree

|   |           |           |           |
|---|-----------|-----------|-----------|
| C | -2.140690 | 0.623652  | 0.051621  |
| C | -3.140871 | 1.607563  | -0.048365 |
| C | -0.768603 | 1.064058  | 0.154976  |
| H | -4.181536 | 1.307943  | -0.095989 |
| C | -2.829763 | 2.960141  | -0.050324 |
| C | -0.493861 | 2.453425  | 0.056253  |
| C | -1.504290 | 3.395168  | 0.007705  |
| H | -1.269002 | 4.454610  | -0.000372 |
| N | 0.204893  | 0.220986  | 0.463098  |
| N | 1.118235  | -0.545033 | 0.822235  |
| C | 2.396594  | -0.239231 | 0.312776  |
| C | 3.540371  | -0.955232 | 0.630991  |
| C | 2.841917  | 0.741179  | -0.607604 |
| N | 4.144143  | 0.638726  | -0.828720 |
| N | 4.547322  | -0.397425 | -0.070466 |
| C | 5.947945  | -0.733627 | -0.027944 |
| H | 6.061722  | -1.750517 | 0.350604  |
| H | 6.354138  | -0.672989 | -1.038417 |
| H | 6.496209  | -0.042341 | 0.619112  |
| H | 3.684218  | -1.796749 | 1.292210  |
| H | 2.256281  | 1.492287  | -1.119217 |
| H | -3.637186 | 3.684357  | -0.109153 |
| C | -2.430982 | -2.939809 | -0.655577 |
| C | -1.521295 | -1.792148 | -0.221805 |
| N | -2.455157 | -0.701493 | 0.050722  |
| C | -3.836328 | -1.154881 | 0.040683  |
| C | -3.716563 | -2.671409 | 0.121146  |
| H | -2.627266 | -2.880039 | -1.732227 |
| H | -0.923412 | -2.057574 | 0.659325  |
| H | -4.394444 | -0.726256 | 0.881667  |
| H | -4.592137 | -3.180972 | -0.288584 |
| H | -0.816692 | -1.498613 | -1.006720 |
| H | -1.991324 | -3.918237 | -0.446808 |
| H | -3.599351 | -2.981273 | 1.165425  |
| H | -4.346311 | -0.848687 | -0.887230 |
| H | 0.548558  | 2.751625  | 0.111108  |

36

4pzHPyrlA-ts-H-m ; E = -816.463134887 Hartree

|   |           |           |           |
|---|-----------|-----------|-----------|
| C | 3.003385  | -1.885121 | -0.247781 |
| C | 4.050747  | -1.490135 | 0.570338  |
| C | 1.852264  | -1.109967 | -0.389538 |
| H | 4.925032  | -2.120809 | 0.694434  |
| C | 3.938403  | -0.283265 | 1.256056  |
| C | 1.790338  | 0.181631  | 0.200113  |
| C | 2.835384  | 0.540622  | 1.070035  |
| H | 2.803011  | 1.493143  | 1.586384  |
| N | 0.789369  | -1.816213 | -1.055784 |
| N | -0.358017 | -1.500331 | -0.691248 |
| C | -1.596636 | -1.252086 | -0.328983 |
| C | -2.011867 | -0.421494 | 0.736422  |
| C | -2.841684 | -1.707672 | -0.884064 |
| N | -3.876866 | -1.210948 | -0.241137 |
| N | -3.346875 | -0.448730 | 0.751363  |
| C | -4.244329 | 0.163524  | 1.698792  |
| H | -5.047549 | 0.664929  | 1.156230  |
| H | -4.678867 | -0.593079 | 2.358014  |

|   |           |           |           |
|---|-----------|-----------|-----------|
| H | -3.692752 | 0.892013  | 2.294317  |
| H | -1.417237 | 0.128649  | 1.450298  |
| H | -2.983264 | -2.352665 | -1.741368 |
| H | 4.730372  | 0.040544  | 1.925544  |
| C | -0.083666 | 2.682452  | -1.607706 |
| C | 0.279824  | 1.203381  | -1.471024 |
| N | 0.762743  | 1.067484  | -0.087791 |
| C | 0.709856  | 2.356086  | 0.586189  |
| C | -0.380814 | 3.097425  | -0.169298 |
| H | 0.771410  | 3.254608  | -1.985009 |
| H | 1.055306  | 0.888023  | -2.178761 |
| H | 0.501100  | 2.227310  | 1.654732  |
| H | -1.367718 | 2.731715  | 0.136736  |
| H | 1.661452  | 2.908363  | 0.498053  |
| H | -0.345656 | 4.177596  | -0.007135 |
| H | -0.921310 | 2.841234  | -2.291349 |
| H | -0.596804 | 0.572520  | -1.639726 |
| H | 3.003765  | -2.845221 | -0.756525 |

36

4pzHPyrlA-ts-H-n ; E = -816.462052174 Hartree

|   |           |           |           |
|---|-----------|-----------|-----------|
| C | -3.087697 | -1.928716 | 0.259092  |
| C | -4.292935 | -1.409103 | -0.186231 |
| C | -1.917131 | -1.167501 | 0.276034  |
| H | -5.185062 | -2.026256 | -0.214901 |
| C | -4.325840 | -0.086762 | -0.619074 |
| C | -1.966186 | 0.210738  | -0.070497 |
| C | -3.187514 | 0.708034  | -0.552719 |
| H | -3.256668 | 1.746186  | -0.856817 |
| N | -0.767180 | -1.972688 | 0.575494  |
| N | 0.336585  | -1.518685 | 0.231543  |
| C | 1.530228  | -1.113684 | -0.132627 |
| C | 2.787960  | -1.469980 | 0.400493  |
| C | 1.871093  | -0.160818 | -1.153302 |
| N | 3.173899  | 0.029765  | -1.231394 |
| N | 3.703472  | -0.739547 | -0.251901 |
| C | 5.113686  | -0.632469 | 0.025251  |
| H | 5.644928  | -0.540587 | -0.922621 |
| H | 5.324580  | 0.248491  | 0.639631  |
| H | 5.449947  | -1.529020 | 0.548115  |
| H | 3.041075  | -2.132004 | 1.215445  |
| H | 1.191397  | 0.319904  | -1.842214 |
| H | -5.251176 | 0.345262  | -0.989605 |
| C | 0.858258  | 2.218509  | 1.189205  |
| C | -0.229361 | 1.155369  | 1.379762  |
| N | -0.856631 | 1.044425  | 0.062712  |
| C | -0.915279 | 2.400407  | -0.454679 |
| C | 0.459175  | 2.964722  | -0.101163 |
| H | 0.905923  | 2.884066  | 2.055250  |
| H | -0.976634 | 1.486279  | 2.120184  |
| H | -1.120708 | 2.394083  | -1.529635 |
| H | 1.173054  | 2.742942  | -0.898443 |
| H | -1.708151 | 2.993240  | 0.037873  |
| H | 0.428095  | 4.049822  | 0.025836  |
| H | 1.839668  | 1.752844  | 1.073198  |
| H | 0.166046  | 0.196589  | 1.714295  |
| H | -2.988080 | -2.967212 | 0.561973  |

36

4pzHPyrlB-ts-B-m ; E = -816.470599862 Hartree

|   |           |           |           |
|---|-----------|-----------|-----------|
| C | -2.423743 | -2.274327 | -0.191243 |
| C | -3.570452 | -2.114826 | 0.570824  |
| C | -1.510280 | -1.204952 | -0.351824 |
| H | -4.226751 | -2.963497 | 0.737988  |
| C | -3.885549 | -0.865845 | 1.098491  |
| C | -1.858295 | 0.091316  | 0.153005  |
| C | -3.048218 | 0.225813  | 0.868487  |
| H | -3.314742 | 1.190597  | 1.285692  |
| N | -0.314796 | -1.421659 | -0.879893 |
| N | 0.794847  | -1.707261 | -1.348134 |
| C | 1.885783  | -1.234866 | -0.589523 |
| C | 1.901072  | -0.459203 | 0.566383  |
| C | 3.247018  | -1.466829 | -0.882757 |
| N | 4.037687  | -0.886845 | 0.008083  |
| N | 3.197878  | -0.279070 | 0.870025  |
| C | 3.748750  | 0.434203  | 1.995614  |
| H | 4.203007  | -0.264033 | 2.703473  |
| H | 4.511792  | 1.131211  | 1.644384  |
| H | 2.948900  | 0.985231  | 2.491531  |
| H | 1.085556  | -0.023350 | 1.125953  |
| H | 3.663208  | -2.030368 | -1.706335 |
| H | -4.791914 | -0.728464 | 1.679732  |
| C | -0.237252 | 2.893082  | -1.489949 |
| C | -0.366241 | 1.372240  | -1.381046 |
| N | -0.971195 | 1.143710  | -0.053432 |
| C | -1.229767 | 2.422038  | 0.594000  |
| C | -0.195315 | 3.342758  | -0.031629 |
| H | 0.640561  | 3.193577  | -2.067380 |
| H | 0.617895  | 0.898202  | -1.445814 |
| H | -2.242145 | 2.800416  | 0.370743  |
| H | -0.432173 | 4.400446  | 0.107741  |
| H | -1.143826 | 2.326067  | 1.682079  |
| H | 0.792970  | 3.149617  | 0.401328  |
| H | -1.121448 | 3.317659  | -1.978205 |
| H | -0.995825 | 0.947292  | -2.170992 |
| H | -2.151094 | -3.236335 | -0.611457 |

36

4pzHPyrlB-ts-B-n ; E = -816.470394752 Hartree

|   |           |           |           |
|---|-----------|-----------|-----------|
| C | 2.277891  | -2.414936 | 0.373558  |
| C | 3.474585  | -2.429051 | -0.325418 |
| C | 1.473659  | -1.250455 | 0.408377  |
| H | 4.044248  | -3.350264 | -0.400284 |
| C | 3.947171  | -1.257177 | -0.909660 |
| C | 1.988139  | -0.030788 | -0.145047 |
| C | 3.222643  | -0.071393 | -0.796726 |
| H | 3.613173  | 0.829965  | -1.255649 |
| N | 0.231189  | -1.320719 | 0.865307  |
| N | -0.932021 | -1.474055 | 1.260674  |
| C | -1.916971 | -0.934161 | 0.405524  |
| C | -3.280246 | -1.032025 | 0.639234  |
| C | -1.813590 | -0.219550 | -0.814368 |
| N | -3.010619 | 0.098772  | -1.282007 |
| N | -3.884400 | -0.402946 | -0.386351 |
| C | -5.297712 | -0.279505 | -0.641438 |
| H | -5.516887 | 0.745562  | -0.944188 |
| H | -5.606879 | -0.960668 | -1.439269 |
| H | -5.847346 | -0.516068 | 0.270517  |
| H | -3.827196 | -1.495347 | 1.446870  |

|   |           |           |           |
|---|-----------|-----------|-----------|
| H | -0.910388 | 0.082617  | -1.327008 |
| H | 4.891711  | -1.253572 | -1.444738 |
| C | 0.567276  | 3.002382  | 1.243715  |
| C | 0.512876  | 1.475016  | 1.192897  |
| N | 1.227725  | 1.123659  | -0.046190 |
| C | 1.665351  | 2.330622  | -0.732023 |
| C | 0.697258  | 3.388439  | -0.227408 |
| H | -0.309961 | 3.431643  | 1.734326  |
| H | -0.526058 | 1.131647  | 1.157239  |
| H | 2.697037  | 2.607475  | -0.454641 |
| H | 1.066786  | 4.405086  | -0.382840 |
| H | 1.638934  | 2.187071  | -1.817814 |
| H | -0.267842 | 3.288245  | -0.736353 |
| H | 1.456319  | 3.334786  | 1.791493  |
| H | 0.991516  | 1.006784  | 2.060502  |
| H | 1.879723  | -3.312458 | 0.834502  |

36

4pzHPyrlB-ts-H-m ; E = -816.466937787 Hartree

|   |           |           |           |
|---|-----------|-----------|-----------|
| C | 2.042122  | 0.742056  | -0.051898 |
| C | 2.640288  | 2.025790  | -0.015252 |
| C | 0.620730  | 0.701785  | -0.136771 |
| H | 3.717882  | 2.108705  | 0.054133  |
| C | 1.886275  | 3.183969  | -0.045767 |
| C | -0.114372 | 1.891483  | -0.158252 |
| C | 0.491554  | 3.131600  | -0.114159 |
| H | -0.098372 | 4.042022  | -0.145526 |
| N | -0.007717 | -0.570350 | -0.291373 |
| N | -1.250750 | -0.582407 | -0.268222 |
| C | -2.564972 | -0.627536 | -0.236049 |
| C | -3.459659 | 0.247303  | 0.419378  |
| C | -3.446295 | -1.594093 | -0.831267 |
| N | -4.711852 | -1.330819 | -0.576093 |
| N | -4.694385 | -0.235123 | 0.215678  |
| C | -5.930625 | 0.213763  | 0.804689  |
| H | -6.727984 | 0.074111  | 0.074180  |
| H | -6.166351 | -0.361322 | 1.705724  |
| H | -5.849023 | 1.271536  | 1.060137  |
| H | -3.267653 | 1.109214  | 1.041835  |
| H | -3.171990 | -2.422608 | -1.470517 |
| H | 2.395211  | 4.143344  | -0.011944 |
| C | 3.709075  | -2.425821 | 0.704462  |
| C | 2.417107  | -1.734926 | 0.278964  |
| N | 2.841204  | -0.365676 | -0.010114 |
| C | 4.291148  | -0.252300 | -0.057210 |
| C | 4.768385  | -1.697780 | -0.115864 |
| H | 3.888648  | -2.265321 | 1.773890  |
| H | 1.974024  | -2.204377 | -0.606110 |
| H | 4.610902  | 0.333014  | -0.927748 |
| H | 5.784238  | -1.816317 | 0.269320  |
| H | 1.646665  | -1.744915 | 1.053959  |
| H | 3.681445  | -3.503545 | 0.524896  |
| H | 4.753525  | -2.053925 | -1.151920 |
| H | 4.681808  | 0.251818  | 0.842121  |
| H | -1.193046 | 1.797428  | -0.245584 |

36

4pzHPyrlB-ts-H-n ; E = -816.466985713 Hartree

|   |          |          |           |
|---|----------|----------|-----------|
| C | 2.110047 | 0.678006 | -0.084349 |
| C | 2.823574 | 1.901304 | -0.111129 |

|   |           |           |           |
|---|-----------|-----------|-----------|
| C | 0.688588  | 0.767348  | -0.068852 |
| H | 3.906427  | 1.885837  | -0.121134 |
| C | 2.177281  | 3.123345  | -0.104242 |
| C | 0.064429  | 2.018749  | -0.053934 |
| C | 0.782360  | 3.198149  | -0.070249 |
| H | 0.276308  | 4.158164  | -0.069994 |
| N | -0.060246 | -0.444144 | -0.163005 |
| N | -1.295568 | -0.345192 | -0.061275 |
| C | -2.602609 | -0.268412 | 0.069757  |
| C | -3.576580 | -1.145421 | -0.453512 |
| C | -3.396686 | 0.702656  | 0.773188  |
| N | -4.685564 | 0.437192  | 0.693243  |
| N | -4.772490 | -0.663068 | -0.087062 |
| C | -6.076357 | -1.118924 | -0.498278 |
| H | -6.433942 | -0.551739 | -1.363408 |
| H | -6.027333 | -2.178608 | -0.753850 |
| H | -6.766905 | -0.974092 | 0.333016  |
| H | -3.464949 | -2.015820 | -1.083057 |
| H | -3.043469 | 1.532270  | 1.371791  |
| H | 2.772113  | 4.032443  | -0.121668 |
| C | 3.533081  | -2.614645 | 0.629962  |
| C | 2.282044  | -1.816904 | 0.274296  |
| N | 2.806012  | -0.498778 | -0.080303 |
| C | 4.253811  | -0.518693 | -0.223303 |
| C | 4.594443  | -2.002398 | -0.277703 |
| H | 3.799700  | -2.450222 | 1.680449  |
| H | 1.737642  | -2.262517 | -0.565475 |
| H | 4.566553  | 0.019525  | -1.126190 |
| H | 5.619659  | -2.205772 | 0.041625  |
| H | 1.570099  | -1.739881 | 1.099972  |
| H | 3.396730  | -3.688764 | 0.480614  |
| H | 4.476385  | -2.375405 | -1.301173 |
| H | 4.747167  | -0.036555 | 0.636804  |
| H | -1.021746 | 2.024106  | -0.059411 |

48

4pzHPyr2-ts-B-m ; E = -1027.64402182 Hartree

|   |           |           |           |
|---|-----------|-----------|-----------|
| C | 0.018016  | 1.708155  | 0.246514  |
| C | 0.472456  | 2.822309  | 0.950309  |
| C | 0.875322  | 0.554440  | 0.080208  |
| H | -0.170515 | 3.676593  | 1.124471  |
| C | 1.782491  | 2.829122  | 1.425175  |
| C | 2.283638  | 0.678900  | 0.413052  |
| C | 2.678986  | 1.807496  | 1.162749  |
| H | 3.690269  | 1.887673  | 1.540309  |
| N | 0.369671  | -0.613993 | -0.247295 |
| N | -0.086001 | -1.773806 | -0.395378 |
| C | -1.430972 | -1.950656 | -0.013360 |
| C | -2.263786 | -1.151158 | 0.763717  |
| C | -2.206642 | -3.101404 | -0.283264 |
| N | -3.415538 | -3.015171 | 0.254925  |
| N | -3.427930 | -1.824119 | 0.881093  |
| C | -4.578842 | -1.454727 | 1.664390  |
| H | -5.475830 | -1.793276 | 1.144481  |
| H | -4.546532 | -1.916050 | 2.656605  |
| H | -4.607313 | -0.368888 | 1.773454  |
| H | -2.092151 | -0.180084 | 1.202800  |
| H | -1.923633 | -3.969337 | -0.862971 |
| H | 2.128904  | 3.689445  | 1.991947  |



|   |           |           |           |
|---|-----------|-----------|-----------|
| C | 5.317409  | -1.172559 | -0.405431 |
| C | 4.593368  | -0.141076 | 0.457836  |
| N | 3.183141  | -0.295650 | 0.115887  |
| C | 2.981042  | -1.393315 | -0.836118 |
| C | 4.246560  | -2.223677 | -0.671083 |
| H | 5.628599  | -0.711505 | -1.349420 |
| H | 4.943731  | 0.876115  | 0.242632  |
| H | 2.076359  | -1.961780 | -0.627572 |
| H | 4.140173  | -2.886637 | 0.194961  |
| C | -2.653651 | 1.828858  | -2.192626 |
| C | -1.481359 | 1.032713  | -1.616396 |
| N | -1.243885 | 1.644357  | -0.294524 |
| C | -2.200188 | 2.713672  | -0.050664 |
| C | -3.371202 | 2.342163  | -0.946651 |
| H | -2.289063 | 2.677792  | -2.782007 |
| H | -1.737978 | -0.024560 | -1.518990 |
| H | -2.454734 | 2.767518  | 1.013787  |
| H | -4.038159 | 3.186022  | -1.139866 |
| H | -0.576873 | 1.104706  | -2.230459 |
| H | -3.287485 | 1.217912  | -2.839951 |
| H | -3.955953 | 1.536982  | -0.486931 |
| H | -1.794943 | 3.695899  | -0.346699 |
| H | 2.897918  | -0.999360 | -1.861285 |
| H | 4.452965  | -2.843464 | -1.547229 |
| H | 6.211779  | -1.566767 | 0.083591  |
| H | 4.748371  | -0.321804 | 1.531251  |

48

4pzHPyr2-ts-B-n ; E = -1027.64570221 Hartree

|   |           |           |           |
|---|-----------|-----------|-----------|
| C | -2.388032 | 0.534910  | 0.365765  |
| C | -2.968947 | 1.605319  | 1.071082  |
| C | -0.963671 | 0.580266  | 0.092335  |
| H | -4.012152 | 1.567669  | 1.361439  |
| C | -2.216660 | 2.731492  | 1.363547  |
| C | -0.264436 | 1.832292  | 0.280721  |
| C | -0.891959 | 2.880231  | 0.956622  |
| H | -0.367951 | 3.807596  | 1.154800  |
| N | -0.321587 | -0.535912 | -0.174845 |
| N | 0.265391  | -1.640693 | -0.269657 |
| C | 1.613651  | -1.646326 | 0.154018  |
| C | 2.490274  | -2.699390 | -0.060972 |
| C | 2.353987  | -0.737728 | 0.953613  |
| N | 3.580494  | -1.186071 | 1.189189  |
| N | 3.641578  | -2.376807 | 0.567061  |
| C | 4.881732  | -3.108593 | 0.566452  |
| H | 5.557956  | -2.741303 | -0.212384 |
| H | 5.358725  | -2.982423 | 1.539026  |
| H | 4.677486  | -4.167032 | 0.395721  |
| H | 2.363816  | -3.623234 | -0.605707 |
| H | 2.019141  | 0.207687  | 1.356004  |
| H | -2.693909 | 3.552597  | 1.892286  |
| C | 2.525310  | 2.230244  | -1.995418 |
| C | 1.416192  | 1.314529  | -1.475373 |
| N | 1.013283  | 1.932282  | -0.201091 |
| C | 1.833125  | 3.097652  | 0.090963  |
| C | 3.095808  | 2.840040  | -0.717102 |
| H | 3.265898  | 1.685000  | -2.585802 |
| H | 1.790479  | 0.299669  | -1.322558 |
| H | 1.346706  | 4.029066  | -0.244800 |

|   |           |           |           |
|---|-----------|-----------|-----------|
| H | 3.679444  | 3.748331  | -0.886542 |
| C | -4.081733 | -2.175196 | -1.365137 |
| C | -2.751781 | -1.501506 | -1.026344 |
| N | -3.111908 | -0.566720 | 0.045936  |
| C | -4.482292 | -0.746246 | 0.488860  |
| C | -4.845898 | -2.125856 | -0.044757 |
| H | -4.618738 | -1.595521 | -2.125046 |
| H | -1.996976 | -2.220194 | -0.692997 |
| H | -4.548832 | -0.676366 | 1.580627  |
| H | -5.924717 | -2.260688 | -0.156319 |
| H | -2.328127 | -0.960867 | -1.879476 |
| H | -3.945047 | -3.188619 | -1.750741 |
| H | -4.473190 | -2.897787 | 0.637480  |
| H | -5.147549 | 0.024955  | 0.065002  |
| H | 2.009541  | 3.182485  | 1.168790  |
| H | 3.727357  | 2.110498  | -0.198144 |
| H | 2.105470  | 3.021241  | -2.627436 |
| H | 0.556397  | 1.257867  | -2.152619 |

48

4pzHPyr2-ts-H-m ; E = -1027.62970419 Hartree

|   |           |           |           |
|---|-----------|-----------|-----------|
| C | -2.414245 | 0.478540  | -0.466572 |
| C | -2.796661 | 1.597562  | -1.241128 |
| C | -1.030468 | 0.365777  | -0.112861 |
| H | -3.805290 | 1.670529  | -1.625085 |
| C | -1.880366 | 2.577237  | -1.574941 |
| C | -0.157273 | 1.483032  | -0.301714 |
| C | -0.576690 | 2.555769  | -1.097739 |
| H | 0.086886  | 3.384433  | -1.308959 |
| N | -0.598401 | -0.939683 | 0.238016  |
| N | 0.610337  | -1.196802 | 0.077661  |
| C | 1.857210  | -1.565482 | -0.100381 |
| C | 2.835718  | -0.892330 | -0.865038 |
| C | 2.580999  | -2.692767 | 0.421699  |
| N | 3.838678  | -2.696433 | 0.027415  |
| N | 3.962924  | -1.614425 | -0.777539 |
| C | 5.197330  | -1.425719 | -1.495558 |
| H | 6.020177  | -1.736400 | -0.850797 |
| H | 5.215373  | -2.025696 | -2.411083 |
| H | 5.311150  | -0.370990 | -1.752247 |
| H | 2.746078  | -0.005354 | -1.473726 |
| H | 2.215468  | -3.452012 | 1.100658  |
| H | -2.204216 | 3.409057  | -2.194749 |
| C | 2.291451  | 1.964399  | 2.301818  |
| C | 1.234281  | 1.040911  | 1.697237  |
| N | 1.081283  | 1.511519  | 0.314434  |
| C | 1.994994  | 2.614060  | 0.056922  |
| C | 3.097241  | 2.400920  | 1.081302  |
| H | 1.820029  | 2.839646  | 2.763402  |
| H | 0.271934  | 1.086685  | 2.220261  |
| H | 2.344081  | 2.594987  | -0.982112 |
| H | 3.762006  | 1.592373  | 0.756794  |
| C | -4.583289 | -2.317276 | 0.598152  |
| C | -3.201407 | -1.674099 | 0.628717  |
| N | -3.372476 | -0.447155 | -0.148462 |
| C | -4.783472 | -0.152241 | -0.372122 |
| C | -5.523006 | -1.120573 | 0.543697  |
| H | -4.691247 | -2.921857 | -0.309755 |
| H | -2.881044 | -1.441468 | 1.655019  |

|   |           |           |           |
|---|-----------|-----------|-----------|
| H | -5.007207 | 0.891559  | -0.123726 |
| H | -6.524013 | -1.359953 | 0.175553  |
| H | -2.424171 | -2.302865 | 0.198574  |
| H | -4.754577 | -2.969969 | 1.458012  |
| H | -5.626652 | -0.678775 | 1.541160  |
| H | -5.059870 | -0.306606 | -1.426968 |
| H | 1.514057  | 3.592572  | 0.226984  |
| H | 3.695831  | 3.300089  | 1.247901  |
| H | 2.890938  | 1.462656  | 3.065511  |
| H | 1.573766  | 0.001906  | 1.719754  |

48

4pzHPyr2-ts-H-n ; E = -1027.62897678 Hartree

|   |           |           |           |
|---|-----------|-----------|-----------|
| C | 2.486232  | 0.398153  | 0.397684  |
| C | 3.007886  | 1.530468  | 1.062935  |
| C | 1.075779  | 0.380219  | 0.137061  |
| H | 4.041752  | 1.543711  | 1.380643  |
| C | 2.196654  | 2.605702  | 1.376693  |
| C | 0.313595  | 1.583777  | 0.284202  |
| C | 0.868573  | 2.666331  | 0.977191  |
| H | 0.288629  | 3.560950  | 1.164502  |
| N | 0.518244  | -0.909231 | -0.033635 |
| N | -0.706806 | -1.045226 | 0.141520  |
| C | -1.971197 | -1.282277 | 0.407523  |
| C | -2.797223 | -2.332523 | -0.044079 |
| C | -2.869484 | -0.488555 | 1.201168  |
| N | -4.085937 | -1.002996 | 1.233485  |
| N | -4.028129 | -2.095357 | 0.443231  |
| C | -5.248015 | -2.796930 | 0.137124  |
| H | -5.746660 | -2.361531 | -0.735390 |
| H | -5.028188 | -3.847983 | -0.059755 |
| H | -5.908332 | -2.717818 | 1.000978  |
| H | -2.581375 | -3.161501 | -0.701754 |
| H | -2.620058 | 0.389590  | 1.780590  |
| H | 2.626504  | 3.446388  | 1.914738  |
| C | -2.289458 | 2.074914  | -2.169937 |
| C | -1.233803 | 1.132093  | -1.592441 |
| N | -0.949720 | 1.674844  | -0.260283 |
| C | -1.785645 | 2.836046  | 0.003556  |
| C | -2.973795 | 2.623389  | -0.920349 |
| H | -1.813293 | 2.894375  | -2.720673 |
| H | -0.314672 | 1.095005  | -2.189266 |
| H | -2.053918 | 2.885698  | 1.064622  |
| H | -3.648325 | 1.873067  | -0.493684 |
| C | 4.341690  | -2.622532 | -0.644212 |
| C | 3.016833  | -1.868895 | -0.610204 |
| N | 3.341168  | -0.625105 | 0.087280  |
| C | 4.783897  | -0.440523 | 0.201603  |
| C | 5.376419  | -1.507742 | -0.711388 |
| H | 4.465806  | -3.195518 | 0.281902  |
| H | 2.640695  | -1.655977 | -1.622385 |
| H | 5.073182  | 0.567839  | -0.115106 |
| H | 6.377981  | -1.814261 | -0.398743 |
| H | 2.227215  | -2.410324 | -0.093348 |
| H | 4.397709  | -3.322909 | -1.481535 |
| H | 5.445662  | -1.120610 | -1.734227 |
| H | 5.119852  | -0.568832 | 1.242334  |
| H | -1.271584 | 3.777094  | -0.257113 |
| H | -3.537704 | 3.542780  | -1.097110 |

|   |           |          |           |
|---|-----------|----------|-----------|
| H | -2.971817 | 1.562485 | -2.852962 |
| H | -1.624433 | 0.113084 | -1.523226 |

30

4pzMe-ts-B-m ; E = -683.860614377 Hartree

|   |           |           |           |
|---|-----------|-----------|-----------|
| C | 2.672850  | -0.314893 | 1.220558  |
| C | 3.954308  | 0.210544  | 1.196392  |
| C | 2.002065  | -0.590815 | 0.000003  |
| H | 4.446029  | 0.410590  | 2.145001  |
| C | 4.615327  | 0.483596  | -0.000010 |
| C | 2.672881  | -0.315002 | -1.220559 |
| H | 2.171426  | -0.530261 | -2.157817 |
| C | 3.954329  | 0.210456  | -1.196406 |
| H | 4.446067  | 0.410434  | -2.145020 |
| H | 2.171377  | -0.530084 | 2.157822  |
| N | 0.771054  | -1.067709 | 0.000007  |
| N | -0.365194 | -1.532473 | -0.000019 |
| C | -1.427397 | -0.625285 | 0.000031  |
| C | -1.436927 | 0.775155  | 0.000033  |
| C | -2.788025 | -1.024691 | 0.000018  |
| N | -3.575635 | 0.037093  | 0.000004  |
| N | -2.739538 | 1.107395  | 0.000023  |
| C | -3.318809 | 2.429867  | -0.000105 |
| H | -4.399219 | 2.295844  | -0.000507 |
| H | -3.022908 | 2.988372  | 0.892224  |
| H | -3.022262 | 2.988493  | -0.892138 |
| C | -0.322276 | 1.756128  | 0.000043  |
| H | 0.321357  | 1.617087  | 0.874547  |
| H | 0.321122  | 1.617383  | -0.874678 |
| H | -0.690305 | 2.784312  | 0.000278  |
| C | -3.338767 | -2.406129 | 0.000023  |
| H | -3.001941 | -2.961785 | -0.879876 |
| H | -3.002005 | -2.961755 | 0.879965  |
| H | -4.429404 | -2.367288 | -0.000013 |
| H | 5.618486  | 0.894927  | -0.000017 |

30

4pzMe-ts-B-n ; E = -683.862607625 Hartree

|   |           |           |           |
|---|-----------|-----------|-----------|
| C | 2.788975  | 0.321153  | -1.219554 |
| C | 4.106642  | -0.105153 | -1.194326 |
| C | 2.099504  | 0.545905  | 0.000084  |
| H | 4.612325  | -0.269190 | -2.142469 |
| C | 4.785632  | -0.325464 | 0.002737  |
| C | 2.786817  | 0.321941  | 1.221089  |
| H | 2.268016  | 0.494025  | 2.157692  |
| C | 4.104526  | -0.104396 | 1.198455  |
| H | 4.608533  | -0.267827 | 2.147594  |
| H | 2.271827  | 0.492641  | -2.157181 |
| N | 0.838072  | 0.938277  | -0.001138 |
| N | -0.325123 | 1.326916  | -0.001704 |
| C | -1.326175 | 0.352198  | -0.001515 |
| C | -2.675187 | 0.699685  | -0.003147 |
| C | -1.289533 | -1.073187 | -0.002008 |
| N | -2.522237 | -1.550265 | -0.003647 |
| N | -3.341466 | -0.467441 | -0.006407 |
| C | -4.768938 | -0.664399 | 0.011443  |
| H | -5.202177 | -0.322641 | 0.956647  |
| H | -5.243994 | -0.127679 | -0.814474 |
| H | -4.944696 | -1.733145 | -0.100710 |
| C | -3.316405 | 2.036588  | -0.001330 |

|   |           |           |           |
|---|-----------|-----------|-----------|
| H | -3.947377 | 2.179936  | 0.882606  |
| H | -2.535831 | 2.799054  | 0.000800  |
| H | -3.944834 | 2.183368  | -0.886641 |
| C | -0.111818 | -1.981124 | -0.003121 |
| H | 0.522406  | -1.811691 | -0.879139 |
| H | 0.522488  | -1.813562 | 0.873192  |
| H | -0.452634 | -3.018203 | -0.004233 |
| H | 5.816989  | -0.659973 | 0.003755  |

30

4pzMe-ts-H-m ; E = -683.857597679 Hartree

|   |           |           |           |
|---|-----------|-----------|-----------|
| C | -2.116417 | -0.470672 | -0.755591 |
| C | -3.253437 | -1.240696 | -0.968823 |
| C | -2.173989 | 0.632458  | 0.099757  |
| H | -3.213980 | -2.088850 | -1.646883 |
| C | -4.447886 | -0.919513 | -0.325277 |
| C | -3.379683 | 0.979213  | 0.709039  |
| H | -3.400580 | 1.862874  | 1.340114  |
| C | -4.508115 | 0.192312  | 0.513635  |
| H | -5.440156 | 0.449057  | 1.008736  |
| H | -1.183891 | -0.688775 | -1.268535 |
| N | -1.068699 | 1.519729  | 0.325970  |
| N | 0.064098  | 1.027337  | 0.177041  |
| C | 1.264786  | 0.507899  | 0.060772  |
| C | 1.662788  | -0.850196 | 0.189820  |
| C | 2.500770  | 1.210925  | -0.188162 |
| N | 3.518684  | 0.378797  | -0.222084 |
| N | 2.993106  | -0.852630 | 0.044311  |
| C | 3.892235  | -1.967922 | 0.195193  |
| H | 3.605829  | -2.791605 | -0.464917 |
| H | 4.886019  | -1.614123 | -0.075950 |
| H | 3.902700  | -2.326660 | 1.229474  |
| C | 0.863540  | -2.046591 | 0.536003  |
| H | 1.048940  | -2.375719 | 1.565425  |
| H | -0.198659 | -1.805662 | 0.451942  |
| H | 1.090516  | -2.889276 | -0.125887 |
| C | 2.641936  | 2.665753  | -0.443406 |
| H | 3.665309  | 2.991398  | -0.248470 |
| H | 2.395494  | 2.911280  | -1.482149 |
| H | 1.946939  | 3.220760  | 0.193178  |
| H | -5.333967 | -1.525152 | -0.490502 |

30

4pzMe-ts-H-n ; E = -683.857916569 Hartree

|   |           |           |           |
|---|-----------|-----------|-----------|
| C | -2.222214 | 0.454656  | 0.754332  |
| C | -3.426176 | 1.108382  | 0.985660  |
| C | -2.191963 | -0.676977 | -0.063388 |
| H | -3.453101 | 1.980703  | 1.632866  |
| C | -4.601257 | 0.640485  | 0.398897  |
| C | -3.374044 | -1.170748 | -0.615032 |
| H | -3.322624 | -2.072610 | -1.218029 |
| C | -4.572327 | -0.500683 | -0.401409 |
| H | -5.488385 | -0.871284 | -0.852238 |
| H | -1.300237 | 0.786800  | 1.222706  |
| N | -1.006819 | -1.448565 | -0.304354 |
| N | 0.069786  | -0.830843 | -0.211155 |
| C | 1.214237  | -0.188034 | -0.172587 |
| C | 2.485718  | -0.769287 | 0.067589  |
| C | 1.502424  | 1.217585  | -0.355931 |
| N | 2.792938  | 1.447951  | -0.232179 |

|   |           |           |           |
|---|-----------|-----------|-----------|
| N | 3.359722  | 0.242070  | 0.060734  |
| C | 4.764238  | 0.200076  | 0.377330  |
| H | 5.246532  | -0.636914 | -0.133658 |
| H | 5.200182  | 1.137519  | 0.033996  |
| H | 4.923245  | 0.100377  | 1.456171  |
| C | 2.809684  | -2.184676 | 0.346537  |
| H | 3.091461  | -2.349370 | 1.393070  |
| H | 1.919506  | -2.782640 | 0.135143  |
| H | 3.633576  | -2.541626 | -0.280418 |
| C | 0.555307  | 2.290567  | -0.750739 |
| H | 0.313677  | 2.223289  | -1.817066 |
| H | -0.390066 | 2.196967  | -0.209210 |
| H | 0.995494  | 3.271158  | -0.560762 |
| H | -5.540414 | 1.155256  | 0.578547  |

52

4pzMeAmid2-ts-B-m ; E = -1478.12028087 Hartree

|   |           |           |           |
|---|-----------|-----------|-----------|
| C | 2.121389  | 1.655123  | 0.009619  |
| C | 2.352425  | 3.013553  | 0.212479  |
| C | 0.781794  | 1.166699  | -0.127203 |
| H | 3.366387  | 3.363133  | 0.348452  |
| C | 1.269998  | 3.888679  | 0.205075  |
| C | -0.299713 | 2.109606  | -0.128905 |
| C | -0.045267 | 3.469082  | 0.020113  |
| H | -0.869750 | 4.168466  | 0.002771  |
| N | 0.541107  | -0.131374 | -0.248895 |
| N | 0.344139  | -1.358220 | -0.419171 |
| C | -0.887749 | -1.837137 | 0.064147  |
| C | -1.616309 | -1.462921 | 1.196153  |
| C | -1.623393 | -2.892471 | -0.531823 |
| N | -2.734230 | -3.126000 | 0.153263  |
| N | -2.696741 | -2.274376 | 1.202663  |
| C | -3.798388 | -2.255055 | 2.130008  |
| H | -3.432286 | -2.175989 | 3.156228  |
| H | -4.473229 | -1.416881 | 1.922938  |
| H | -4.340842 | -3.192148 | 2.010621  |
| C | -1.332269 | -0.488012 | 2.281867  |
| H | -1.371976 | -0.968516 | 3.265607  |
| H | -0.338336 | -0.059706 | 2.151253  |
| H | -2.049863 | 0.339442  | 2.284358  |
| C | -1.294617 | -3.639046 | -1.775590 |
| H | -1.428936 | -3.010233 | -2.661989 |
| H | -0.249966 | -3.962013 | -1.765211 |
| H | -1.942397 | -4.512672 | -1.869267 |
| H | 1.461143  | 4.949255  | 0.339302  |
| N | 3.105351  | 0.686976  | -0.044781 |
| H | 2.760260  | -0.241518 | -0.266016 |
| N | -1.554233 | 1.559947  | -0.326280 |
| H | -1.559771 | 0.548928  | -0.416676 |
| C | 4.456258  | 0.841672  | 0.128004  |
| O | 5.018435  | 1.890814  | 0.404718  |
| C | -2.771418 | 2.191388  | -0.358904 |
| O | -2.951012 | 3.393756  | -0.240548 |
| C | 6.558667  | -0.640894 | 0.045468  |
| C | 6.732189  | -2.028963 | -0.217475 |
| C | 5.486396  | -2.528536 | -0.448564 |
| O | 4.557355  | -1.553262 | -0.347864 |
| C | 5.219370  | -0.401103 | -0.045801 |
| H | 7.309668  | 0.100256  | 0.273517  |

|   |           |           |           |
|---|-----------|-----------|-----------|
| H | 7.658110  | -2.584877 | -0.233923 |
| H | 5.112571  | -3.512315 | -0.687114 |
| C | -5.246285 | 1.484859  | -0.571797 |
| C | -5.851466 | 0.210578  | -0.770009 |
| C | -4.830181 | -0.688413 | -0.856254 |
| O | -3.641882 | -0.059147 | -0.723303 |
| C | -3.899779 | 1.267188  | -0.548595 |
| H | -5.724880 | 2.445913  | -0.458163 |
| H | -6.906248 | -0.010789 | -0.842829 |
| H | -4.770499 | -1.758956 | -0.987559 |

52

4pzMeAmid2-ts-B-n ; E = -1478.11684741 Hartree

|   |           |           |           |
|---|-----------|-----------|-----------|
| C | -2.104529 | -1.713990 | 0.005353  |
| C | -2.359900 | -3.070608 | 0.174920  |
| C | -0.757504 | -1.241081 | -0.131842 |
| H | -3.379882 | -3.402138 | 0.311346  |
| C | -1.296734 | -3.967700 | 0.119665  |
| C | 0.305261  | -2.200997 | -0.157457 |
| C | 0.019968  | -3.561016 | -0.068222 |
| H | 0.830190  | -4.273980 | -0.135805 |
| N | -0.530477 | 0.057242  | -0.281020 |
| N | -0.286594 | 1.262931  | -0.503547 |
| C | 0.886813  | 1.798395  | 0.046152  |
| C | 1.512238  | 2.909942  | -0.514471 |
| C | 1.602617  | 1.520531  | 1.247012  |
| N | 2.600296  | 2.384321  | 1.387435  |
| N | 2.536370  | 3.201030  | 0.310467  |
| C | 3.547446  | 4.211519  | 0.135195  |
| H | 4.304598  | 3.896138  | -0.591166 |
| H | 3.096189  | 5.145603  | -0.207205 |
| H | 4.019601  | 4.371102  | 1.104055  |
| C | 1.188468  | 3.644960  | -1.761357 |
| H | 1.940820  | 3.481054  | -2.541020 |
| H | 0.227343  | 3.285270  | -2.133671 |
| H | 1.115201  | 4.724029  | -1.589013 |
| C | 1.307006  | 0.518872  | 2.309498  |
| H | 1.811663  | 0.812322  | 3.232054  |
| H | 0.231006  | 0.458472  | 2.496322  |
| H | 1.647396  | -0.485161 | 2.040742  |
| H | -1.504767 | -5.028833 | 0.217730  |
| N | -3.076734 | -0.729736 | -0.024306 |
| H | -2.722570 | 0.194338  | -0.247943 |
| N | 1.584692  | -1.687671 | -0.302396 |
| H | 1.653170  | -0.679193 | -0.221083 |
| C | -4.426541 | -0.866474 | 0.158191  |
| O | -5.004344 | -1.908186 | 0.432492  |
| C | 2.760733  | -2.376477 | -0.467270 |
| O | 2.855810  | -3.575170 | -0.682888 |
| C | -6.509186 | 0.644791  | 0.106975  |
| C | -6.668059 | 2.037399  | -0.142220 |
| C | -5.418631 | 2.523518  | -0.380692 |
| O | -4.500523 | 1.535709  | -0.297340 |
| C | -5.174167 | 0.389060  | 0.001001  |
| H | -7.266857 | -0.089192 | 0.335984  |
| H | -7.587165 | 2.604794  | -0.144762 |
| H | -5.035110 | 3.504842  | -0.613839 |
| C | 5.280209  | -1.801982 | -0.509085 |
| C | 5.975830  | -0.603025 | -0.180711 |

|   |          |           |           |
|---|----------|-----------|-----------|
| C | 5.022890 | 0.306832  | 0.167715  |
| O | 3.793981 | -0.241002 | 0.068558  |
| C | 3.954306 | -1.529108 | -0.341487 |
| H | 5.687880 | -2.751403 | -0.822002 |
| H | 7.043720 | -0.440585 | -0.190407 |
| H | 5.044113 | 1.324726  | 0.525489  |

52

4pzMeAmid2-ts-H-m ; E = -1478.11838419 Hartree

|   |           |           |           |
|---|-----------|-----------|-----------|
| C | 0.111351  | -1.954017 | -0.168188 |
| C | -0.132107 | -3.312097 | 0.053369  |
| C | -0.963961 | -1.037001 | -0.132526 |
| H | 0.698627  | -4.003579 | 0.039375  |
| C | -1.433574 | -3.742904 | 0.277383  |
| C | -2.284646 | -1.517903 | 0.027968  |
| C | -2.518062 | -2.874568 | 0.254565  |
| H | -3.531171 | -3.217231 | 0.410604  |
| N | -0.879995 | 0.368494  | -0.352176 |
| N | 0.155484  | 0.956245  | 0.021250  |
| C | 1.263350  | 1.587897  | 0.328491  |
| C | 2.251356  | 1.192288  | 1.272432  |
| C | 1.802199  | 2.785568  | -0.267436 |
| N | 2.989109  | 3.060543  | 0.230278  |
| N | 3.212421  | 2.117255  | 1.192442  |
| C | 4.450717  | 2.162466  | 1.928384  |
| H | 4.272151  | 1.923534  | 2.979029  |
| H | 5.173138  | 1.452438  | 1.512063  |
| H | 4.846372  | 3.173931  | 1.843319  |
| C | 2.240586  | 0.073523  | 2.241812  |
| H | 2.160305  | 0.432665  | 3.274545  |
| H | 1.378228  | -0.565161 | 2.039409  |
| H | 3.148922  | -0.533394 | 2.166046  |
| C | 1.187915  | 3.575726  | -1.362963 |
| H | 1.290827  | 3.062888  | -2.325657 |
| H | 0.116956  | 3.701960  | -1.179915 |
| H | 1.665179  | 4.554111  | -1.440880 |
| H | -1.611058 | -4.799366 | 0.454867  |
| N | 1.384709  | -1.478455 | -0.497393 |
| H | 1.434282  | -0.517889 | -0.801008 |
| N | -3.288902 | -0.557479 | -0.027381 |
| H | -2.946325 | 0.371546  | -0.256331 |
| C | 2.589932  | -2.109207 | -0.355315 |
| O | 2.766919  | -3.238922 | 0.076579  |
| C | -4.633231 | -0.733103 | 0.137371  |
| O | -5.191621 | -1.789280 | 0.400822  |
| C | 5.078228  | -1.472461 | -0.567146 |
| C | 5.722374  | -0.282717 | -1.016801 |
| C | 4.728544  | 0.556764  | -1.422574 |
| O | 3.522302  | -0.029482 | -1.258944 |
| C | 3.740112  | -1.266932 | -0.730824 |
| H | 5.525375  | -2.369899 | -0.166873 |
| H | 6.782853  | -0.078365 | -1.042417 |
| H | 4.711008  | 1.561894  | -1.814976 |
| C | -6.759133 | 0.715190  | 0.065361  |
| C | -6.959576 | 2.102398  | -0.184579 |
| C | -5.723541 | 2.627763  | -0.408702 |
| O | -4.775598 | 1.669402  | -0.315703 |
| C | -5.415685 | 0.501888  | -0.025632 |
| H | -7.495269 | -0.043065 | 0.285227  |



|   |           |          |           |
|---|-----------|----------|-----------|
| H | -7.896038 | 2.640574 | -0.197135 |
| H | -5.369049 | 3.621082 | -0.637179 |

52

4pzMeAmid2-ts-H-n ; E = -1478.11386239 Hartree

|   |           |           |           |
|---|-----------|-----------|-----------|
| C | 0.108413  | -2.035276 | -0.112141 |
| C | -0.173008 | -3.389137 | 0.089609  |
| C | -0.946051 | -1.094237 | -0.100881 |
| H | 0.642563  | -4.098589 | 0.097454  |
| C | -1.490322 | -3.791574 | 0.268158  |
| C | -2.281942 | -1.545681 | 0.013316  |
| C | -2.553656 | -2.898389 | 0.218516  |
| H | -3.578721 | -3.218981 | 0.339010  |
| N | -0.824189 | 0.311334  | -0.295388 |
| N | 0.215289  | 0.870633  | 0.110830  |
| C | 1.297690  | 1.492237  | 0.514659  |
| C | 1.812278  | 2.714574  | 0.009755  |
| C | 2.266714  | 1.081357  | 1.508980  |
| N | 3.246591  | 1.956412  | 1.584377  |
| N | 2.971474  | 2.907704  | 0.646369  |
| C | 3.968680  | 3.917432  | 0.402525  |
| H | 3.508529  | 4.788262  | -0.066052 |
| H | 4.407815  | 4.202813  | 1.358833  |
| H | 4.760545  | 3.530303  | -0.247503 |
| C | 1.250794  | 3.570223  | -1.058595 |
| H | 0.242074  | 3.213690  | -1.281591 |
| H | 1.190621  | 4.618795  | -0.749124 |
| H | 1.838276  | 3.525951  | -1.982870 |
| C | 2.170109  | -0.082925 | 2.428270  |
| H | 1.961502  | 0.245446  | 3.451325  |
| H | 1.361860  | -0.745957 | 2.113454  |
| H | 3.107382  | -0.645123 | 2.442899  |
| H | -1.697316 | -4.844927 | 0.431662  |
| N | 1.398190  | -1.586407 | -0.404190 |
| H | 1.477477  | -0.620623 | -0.683357 |
| N | -3.262483 | -0.561646 | -0.062505 |
| H | -2.891124 | 0.362494  | -0.263811 |
| C | 2.584748  | -2.250007 | -0.255031 |
| O | 2.726877  | -3.386699 | 0.170613  |
| C | -4.614851 | -0.708235 | 0.053341  |
| O | -5.207163 | -1.754451 | 0.279844  |
| C | 5.088371  | -1.697681 | -0.503185 |
| C | 5.767035  | -0.551177 | -1.006896 |
| C | 4.796928  | 0.313025  | -1.412475 |
| O | 3.571114  | -0.213697 | -1.198194 |
| C | 3.756121  | -1.443158 | -0.638537 |
| H | 5.509923  | -2.600466 | -0.087851 |
| H | 6.833605  | -0.389696 | -1.061262 |
| H | 4.816071  | 1.291797  | -1.866581 |
| C | -6.704217 | 0.788735  | -0.065152 |
| C | -6.866571 | 2.183845  | -0.298631 |
| C | -5.612941 | 2.685250  | -0.473766 |
| O | -4.689118 | 1.704825  | -0.365893 |
| C | -5.363530 | 0.547224  | -0.115886 |
| H | -7.463125 | 0.043438  | 0.118557  |
| H | -7.790369 | 2.742622  | -0.332447 |
| H | -5.230134 | 3.674164  | -0.673874 |

30

4pzMeCl1A-ts-B-m ; E = -1143.30051289 Hartree

|    |           |           |           |
|----|-----------|-----------|-----------|
| C  | -2.526970 | -0.089443 | -0.648197 |
| C  | -3.797384 | 0.425153  | -0.462605 |
| C  | -1.742581 | -0.537425 | 0.447543  |
| H  | -4.355732 | 0.745415  | -1.336528 |
| C  | -4.339646 | 0.538265  | 0.814883  |
| C  | -2.309782 | -0.413168 | 1.744361  |
| H  | -1.728308 | -0.749458 | 2.595449  |
| C  | -3.577606 | 0.118036  | 1.904165  |
| H  | -3.979622 | 0.198316  | 2.910310  |
| Cl | -1.835371 | -0.201767 | -2.243638 |
| N  | -0.534542 | -1.024791 | 0.267597  |
| N  | 0.598767  | -1.494430 | 0.214264  |
| C  | 1.666600  | -0.605121 | 0.172861  |
| C  | 1.698994  | 0.796715  | 0.149872  |
| C  | 3.020981  | -1.027669 | 0.127683  |
| N  | 3.823980  | 0.020079  | 0.085565  |
| N  | 3.004612  | 1.105225  | 0.098538  |
| C  | 3.605634  | 2.417093  | 0.040521  |
| H  | 3.312918  | 2.942778  | -0.872561 |
| H  | 3.323163  | 3.015646  | 0.910613  |
| H  | 4.683637  | 2.265293  | 0.040216  |
| C  | 0.601811  | 1.796546  | 0.152644  |
| H  | -0.054613 | 1.644000  | -0.710159 |
| H  | -0.023597 | 1.690886  | 1.044241  |
| H  | 0.987382  | 2.817576  | 0.118598  |
| C  | 3.547107  | -2.418249 | 0.129149  |
| H  | 4.634638  | -2.400386 | 0.040994  |
| H  | 3.274366  | -2.939631 | 1.051399  |
| H  | 3.128961  | -2.993152 | -0.701843 |
| H  | -5.334557 | 0.945770  | 0.952080  |

30

4pzMeCl1A-ts-B-n ; E = -1143.30224341 Hartree

|    |           |           |           |
|----|-----------|-----------|-----------|
| C  | -2.620841 | -0.672404 | -0.024855 |
| C  | -3.929345 | -0.427053 | -0.400267 |
| C  | -1.827235 | 0.333750  | 0.586138  |
| H  | -4.492970 | -1.233827 | -0.857916 |
| C  | -4.502942 | 0.826516  | -0.204894 |
| C  | -2.426376 | 1.606757  | 0.777853  |
| H  | -1.836671 | 2.389723  | 1.241143  |
| C  | -3.733099 | 1.830267  | 0.380883  |
| H  | -4.158874 | 2.816948  | 0.540567  |
| Cl | -1.894246 | -2.232179 | -0.294794 |
| N  | -0.583393 | 0.096199  | 0.942484  |
| N  | 0.576911  | -0.055799 | 1.309933  |
| C  | 1.581715  | 0.111598  | 0.363591  |
| C  | 2.925786  | -0.043286 | 0.704960  |
| C  | 1.564631  | 0.433081  | -1.026571 |
| N  | 2.801419  | 0.472662  | -1.487431 |
| N  | 3.604857  | 0.183476  | -0.431020 |
| C  | 5.029843  | 0.163452  | -0.643281 |
| H  | 5.528281  | -0.132876 | 0.279681  |
| H  | 5.272892  | -0.550083 | -1.433520 |
| H  | 5.377401  | 1.155548  | -0.941711 |
| C  | 3.526215  | -0.384764 | 2.018130  |
| H  | 4.185091  | 0.410275  | 2.382722  |
| H  | 2.718886  | -0.522466 | 2.739400  |
| H  | 4.107393  | -1.311465 | 1.968550  |
| C  | 0.401001  | 0.686834  | -1.916025 |

|   |           |           |           |
|---|-----------|-----------|-----------|
| H | -0.260341 | -0.184739 | -1.952659 |
| H | -0.202184 | 1.526150  | -1.556202 |
| H | 0.756180  | 0.908214  | -2.924140 |
| H | -5.527573 | 1.011379  | -0.506150 |

30

4pzMeCl1A-ts-H-m ; E = -1143.29239648 Hartree

|    |           |           |           |
|----|-----------|-----------|-----------|
| C  | 2.197202  | -0.299728 | 0.598727  |
| C  | 3.371216  | -1.045137 | 0.524926  |
| C  | 1.998588  | 0.808848  | -0.231926 |
| H  | 3.503715  | -1.890084 | 1.192704  |
| C  | 4.359903  | -0.692932 | -0.386027 |
| C  | 3.026491  | 1.174442  | -1.103433 |
| H  | 2.869344  | 2.063128  | -1.708045 |
| C  | 4.188337  | 0.423547  | -1.202369 |
| H  | 4.963162  | 0.711208  | -1.906268 |
| Cl | 1.023026  | -0.742043 | 1.809828  |
| N  | 0.860991  | 1.692105  | -0.202819 |
| N  | -0.251290 | 1.138254  | -0.173391 |
| C  | -1.438921 | 0.586814  | -0.167914 |
| C  | -1.773473 | -0.762168 | -0.468087 |
| C  | -2.708394 | 1.204342  | 0.134059  |
| N  | -3.688698 | 0.335121  | 0.036990  |
| N  | -3.099914 | -0.839145 | -0.351494 |
| C  | -3.947683 | -1.966595 | -0.645100 |
| H  | -4.036003 | -2.122469 | -1.725314 |
| H  | -3.550386 | -2.873984 | -0.183677 |
| H  | -4.930872 | -1.745881 | -0.231420 |
| C  | -0.904154 | -1.870898 | -0.919173 |
| H  | 0.134905  | -1.537011 | -0.892464 |
| H  | -1.002176 | -2.748395 | -0.271630 |
| H  | -1.140963 | -2.180143 | -1.943681 |
| C  | -2.922136 | 2.609548  | 0.559364  |
| H  | -2.652319 | 2.743238  | 1.612369  |
| H  | -2.281896 | 3.277498  | -0.023611 |
| H  | -3.968096 | 2.893753  | 0.432023  |
| H  | 5.270674  | -1.280963 | -0.441333 |

30

4pzMeCl1A-ts-H-n ; E = -1143.29188391 Hartree

|    |           |           |           |
|----|-----------|-----------|-----------|
| C  | 2.282253  | -0.316769 | 0.601080  |
| C  | 3.522443  | -0.939973 | 0.492330  |
| C  | 2.009424  | 0.861538  | -0.101449 |
| H  | 3.710455  | -1.845929 | 1.059054  |
| C  | 4.503606  | -0.392868 | -0.326058 |
| C  | 3.026033  | 1.421917  | -0.876502 |
| H  | 2.806991  | 2.359223  | -1.379979 |
| C  | 4.256050  | 0.794939  | -1.011291 |
| H  | 5.023545  | 1.233685  | -1.641401 |
| Cl | 1.114825  | -1.002693 | 1.700199  |
| N  | 0.790550  | 1.624145  | -0.014854 |
| N  | -0.258426 | 0.966199  | -0.123737 |
| C  | -1.389922 | 0.323384  | -0.271192 |
| C  | -2.680851 | 0.789230  | 0.090866  |
| C  | -1.630304 | -0.995096 | -0.812762 |
| N  | -2.912610 | -1.284282 | -0.780084 |
| N  | -3.522022 | -0.203287 | -0.203013 |
| C  | -4.931157 | -0.287935 | 0.084052  |
| H  | -5.103931 | -0.609353 | 1.116445  |
| H  | -5.406986 | 0.682137  | -0.074221 |

|   |           |           |           |
|---|-----------|-----------|-----------|
| H | -5.360533 | -1.022805 | -0.596250 |
| C | -3.046888 | 2.073184  | 0.726305  |
| H | -2.161260 | 2.713369  | 0.729335  |
| H | -3.848818 | 2.581394  | 0.180484  |
| H | -3.378112 | 1.941130  | 1.762487  |
| C | -0.631773 | -1.902795 | -1.430782 |
| H | -0.384493 | -1.574140 | -2.446048 |
| H | 0.295007  | -1.898898 | -0.851864 |
| H | -1.026184 | -2.918919 | -1.486349 |
| H | 5.466367  | -0.887076 | -0.410843 |

30

4pzMeCl1B-ts-B-m ; E = -1143.30051303 Hartree

|    |           |           |           |
|----|-----------|-----------|-----------|
| C  | 2.306295  | -0.414338 | 1.744410  |
| C  | 3.574124  | 0.115934  | 1.907305  |
| C  | 1.741938  | -0.537531 | 0.446250  |
| H  | 3.974078  | 0.195119  | 2.914359  |
| C  | 4.338553  | 0.536908  | 0.820001  |
| C  | 2.528697  | -0.088869 | -0.647507 |
| Cl | 1.840409  | -0.199074 | -2.243903 |
| C  | 3.798808  | 0.425346  | -0.458690 |
| H  | 4.359040  | 0.746361  | -1.331133 |
| H  | 1.722826  | -0.750959 | 2.594000  |
| N  | 0.534171  | -1.024536 | 0.263391  |
| N  | -0.599006 | -1.494446 | 0.209543  |
| C  | -1.667104 | -0.605334 | 0.170937  |
| C  | -1.699689 | 0.796515  | 0.148857  |
| C  | -3.021476 | -1.028027 | 0.126845  |
| N  | -3.824646 | 0.019656  | 0.086340  |
| N  | -3.005390 | 1.104893  | 0.098969  |
| C  | -3.606629 | 2.416745  | 0.042790  |
| H  | -4.684577 | 2.264616  | 0.038872  |
| H  | -3.326939 | 3.013070  | 0.915333  |
| H  | -3.311347 | 2.944949  | -0.867986 |
| C  | -0.602593 | 1.796409  | 0.150512  |
| H  | -0.988287 | 2.817429  | 0.117496  |
| H  | 0.024144  | 1.690425  | 1.041134  |
| H  | 0.052588  | 1.644244  | -0.713318 |
| C  | -3.547411 | -2.418663 | 0.128481  |
| H  | -3.123809 | -2.995582 | -0.698296 |
| H  | -3.280607 | -2.937640 | 1.053858  |
| H  | -4.634381 | -2.401215 | 0.033557  |
| H  | 5.333337  | 0.943895  | 0.959627  |

30

4pzMeCl1B-ts-B-n ; E = -1143.30233100 Hartree

|    |           |           |           |
|----|-----------|-----------|-----------|
| C  | 2.441702  | -1.613524 | -0.756322 |
| C  | 3.749323  | -1.820289 | -0.353369 |
| C  | 1.831195  | -0.343342 | -0.583286 |
| H  | 4.183797  | -2.805488 | -0.497987 |
| C  | 4.509498  | -0.801556 | 0.219047  |
| C  | 2.614945  | 0.678448  | 0.014385  |
| Cl | 1.874901  | 2.235792  | 0.260190  |
| C  | 3.925032  | 0.449832  | 0.394962  |
| H  | 4.481047  | 1.268031  | 0.841500  |
| H  | 1.859642  | -2.407975 | -1.209593 |
| N  | 0.585892  | -0.121756 | -0.945009 |
| N  | -0.574817 | 0.023109  | -1.313577 |
| C  | -1.578435 | -0.126884 | -0.362190 |
| C  | -2.922660 | 0.019668  | -0.704128 |

|   |           |           |           |
|---|-----------|-----------|-----------|
| C | -1.559629 | -0.427578 | 1.032796  |
| N | -2.796047 | -0.462498 | 1.495563  |
| N | -3.601464 | -0.196293 | 0.433616  |
| C | -5.025644 | -0.115065 | 0.639299  |
| H | -5.358632 | 0.926380  | 0.694312  |
| H | -5.555196 | -0.618699 | -0.172800 |
| H | -5.245731 | -0.612501 | 1.582824  |
| C | -3.541153 | 0.344834  | -2.011751 |
| H | -2.748732 | 0.472649  | -2.750884 |
| H | -4.209129 | -0.454181 | -2.351735 |
| H | -4.124773 | 1.270188  | -1.961617 |
| C | -0.395550 | -0.672883 | 1.924400  |
| H | 0.207584  | -1.515707 | 1.572878  |
| H | 0.265657  | 0.199048  | 1.953325  |
| H | -0.750645 | -0.884826 | 2.934602  |
| H | 5.535101  | -0.973271 | 0.524742  |

30

4pzMeCl1B-ts-H-m ; E = -1143.29336567 Hartree

|    |           |           |           |
|----|-----------|-----------|-----------|
| C  | 1.485018  | -1.149017 | 0.951699  |
| C  | 2.463617  | -2.126387 | 1.071157  |
| C  | 1.753437  | 0.065136  | 0.314805  |
| H  | 2.242950  | -3.057848 | 1.583939  |
| C  | 3.732987  | -1.900168 | 0.543552  |
| C  | 3.039940  | 0.286178  | -0.185827 |
| Cl | 3.417376  | 1.782849  | -0.979889 |
| C  | 4.021156  | -0.694084 | -0.088053 |
| H  | 5.003250  | -0.504888 | -0.508082 |
| H  | 0.494651  | -1.287831 | 1.377194  |
| N  | 0.801239  | 1.136736  | 0.274240  |
| N  | -0.392925 | 0.795213  | 0.223308  |
| C  | -1.654449 | 0.446948  | 0.124597  |
| C  | -2.204121 | -0.780094 | -0.339059 |
| C  | -2.811838 | 1.255766  | 0.427414  |
| N  | -3.922960 | 0.595356  | 0.190199  |
| N  | -3.529492 | -0.619405 | -0.299761 |
| C  | -4.541982 | -1.538776 | -0.753970 |
| H  | -4.436666 | -2.508766 | -0.259928 |
| H  | -5.506083 | -1.102420 | -0.496541 |
| H  | -4.483555 | -1.681179 | -1.837621 |
| C  | -1.526815 | -1.983139 | -0.870792 |
| H  | -0.458149 | -1.918982 | -0.653470 |
| H  | -1.925980 | -2.901180 | -0.426515 |
| H  | -1.641425 | -2.064470 | -1.958089 |
| C  | -2.795821 | 2.630081  | 0.985907  |
| H  | -2.625027 | 2.613120  | 2.067717  |
| H  | -1.977269 | 3.201183  | 0.538980  |
| H  | -3.746269 | 3.131939  | 0.796538  |
| H  | 4.506361  | -2.657069 | 0.629501  |

30

4pzMeCl1B-ts-H-n ; E = -1143.29395053 Hartree

|    |           |           |           |
|----|-----------|-----------|-----------|
| C  | -1.624649 | 1.206748  | 0.852069  |
| C  | -2.696446 | 2.082053  | 0.958113  |
| C  | -1.789574 | -0.071625 | 0.314630  |
| H  | -2.553411 | 3.067586  | 1.391028  |
| C  | -3.957629 | 1.685235  | 0.518928  |
| C  | -3.066985 | -0.463660 | -0.096224 |
| Cl | -3.317368 | -2.047498 | -0.763752 |
| C  | -4.143446 | 0.411969  | -0.011052 |

|   |           |           |           |
|---|-----------|-----------|-----------|
| H | -5.118256 | 0.089850  | -0.361297 |
| H | -0.635627 | 1.478435  | 1.210649  |
| N | -0.728907 | -1.035789 | 0.289894  |
| N | 0.415968  | -0.568176 | 0.156648  |
| C | 1.628556  | -0.106340 | -0.038347 |
| C | 2.836180  | -0.787246 | 0.268560  |
| C | 2.069756  | 1.152051  | -0.599607 |
| N | 3.383459  | 1.217093  | -0.618898 |
| N | 3.822307  | 0.048355  | -0.062132 |
| C | 5.236816  | -0.116458 | 0.156923  |
| H | 5.753220  | 0.560940  | -0.522377 |
| H | 5.507380  | 0.131610  | 1.188511  |
| H | 5.534167  | -1.145934 | -0.054026 |
| C | 3.003171  | -2.121561 | 0.882906  |
| H | 3.685960  | -2.750920 | 0.302476  |
| H | 3.391926  | -2.061006 | 1.905748  |
| H | 2.022409  | -2.602587 | 0.916251  |
| C | 1.228639  | 2.223171  | -1.190029 |
| H | 0.826299  | 1.909864  | -2.159265 |
| H | 0.368617  | 2.443639  | -0.551466 |
| H | 1.819998  | 3.128397  | -1.337913 |
| H | -4.803576 | 2.361189  | 0.595659  |

30

4pzMeCl2-ts-B-m ; E = -1602.73869229 Hartree

|    |           |           |           |
|----|-----------|-----------|-----------|
| C  | -2.291672 | 1.206109  | -0.094275 |
| C  | -3.567756 | 1.202224  | 0.437661  |
| C  | -1.605234 | -0.001300 | -0.401671 |
| H  | -4.042379 | 2.155729  | 0.644143  |
| C  | -4.222397 | 0.002979  | 0.706169  |
| C  | -2.292744 | -1.206329 | -0.087474 |
| Cl | -1.458158 | -2.703585 | -0.380894 |
| C  | -3.568805 | -1.198345 | 0.444421  |
| H  | -4.044258 | -2.150256 | 0.656277  |
| Cl | -1.455880 | 2.700819  | -0.396067 |
| N  | -0.400834 | -0.003298 | -0.915574 |
| N  | 0.722051  | -0.004560 | -1.411185 |
| C  | 1.810514  | -0.002207 | -0.555422 |
| C  | 1.880873  | 0.003440  | 0.846240  |
| C  | 3.154729  | -0.004588 | -1.014524 |
| N  | 3.984794  | -0.000895 | 0.011630  |
| N  | 3.193634  | 0.003849  | 1.119330  |
| C  | 3.831541  | 0.009434  | 2.415281  |
| H  | 3.558718  | 0.903964  | 2.981494  |
| H  | 3.560309  | -0.881142 | 2.988465  |
| H  | 4.904806  | 0.009684  | 2.233274  |
| C  | 0.808978  | 0.007800  | 1.872243  |
| H  | 0.165810  | 0.885388  | 1.752645  |
| H  | 0.168331  | -0.872988 | 1.762781  |
| H  | 1.219270  | 0.014229  | 2.884060  |
| C  | 3.642351  | -0.010883 | -2.418610 |
| H  | 3.283092  | -0.895687 | -2.951838 |
| H  | 3.275852  | 0.864519  | -2.962242 |
| H  | 4.733449  | -0.006679 | -2.429398 |
| H  | -5.224122 | 0.004579  | 1.119051  |

30

4pzMeCl2-ts-B-n ; E = -1602.74057169 Hartree

|   |           |          |           |
|---|-----------|----------|-----------|
| C | -2.373117 | 1.214048 | -0.126854 |
| C | -3.685897 | 1.219032 | 0.306855  |

|    |           |           |           |
|----|-----------|-----------|-----------|
| C  | -1.674505 | 0.001646  | -0.378864 |
| H  | -4.167771 | 2.175840  | 0.478075  |
| C  | -4.367709 | 0.024479  | 0.522661  |
| C  | -2.393792 | -1.198646 | -0.127531 |
| Cl | -1.555257 | -2.701471 | -0.370961 |
| C  | -3.706384 | -1.181476 | 0.306295  |
| H  | -4.204522 | -2.129989 | 0.477115  |
| Cl | -1.509199 | 2.703032  | -0.369418 |
| N  | -0.433279 | -0.008982 | -0.797940 |
| N  | 0.721674  | -0.009470 | -1.209471 |
| C  | 1.743025  | -0.009834 | -0.273781 |
| C  | 3.082237  | -0.012772 | -0.668440 |
| C  | 1.754452  | -0.013081 | 1.154051  |
| N  | 3.001136  | -0.017318 | 1.586325  |
| N  | 3.784457  | -0.022354 | 0.473948  |
| C  | 5.216521  | 0.025943  | 0.631050  |
| H  | 5.448864  | -0.345442 | 1.628274  |
| H  | 5.697986  | -0.606925 | -0.117405 |
| H  | 5.590235  | 1.050072  | 0.531800  |
| C  | 3.670213  | -0.005427 | -2.029255 |
| H  | 4.292389  | 0.880542  | -2.193995 |
| H  | 4.292608  | -0.889953 | -2.202809 |
| H  | 2.859992  | -0.003116 | -2.760017 |
| C  | 0.607511  | -0.018167 | 2.099081  |
| H  | -0.025902 | 0.862721  | 1.954049  |
| H  | -0.025695 | -0.897703 | 1.945037  |
| H  | 0.981567  | -0.023385 | 3.124461  |
| H  | -5.397248 | 0.033203  | 0.860235  |

30

4pzMeCl2-ts-H-m ; E = -1602.72751287 Hartree

|    |           |           |           |
|----|-----------|-----------|-----------|
| C  | 1.745773  | -1.145446 | 0.661189  |
| C  | 2.818605  | -1.973711 | 0.346842  |
| C  | 1.729282  | 0.206013  | 0.299789  |
| H  | 2.798516  | -3.012215 | 0.658700  |
| C  | 3.901373  | -1.454015 | -0.350962 |
| C  | 2.846064  | 0.699126  | -0.382484 |
| Cl | 2.871643  | 2.370215  | -0.855058 |
| C  | 3.919119  | -0.113815 | -0.722296 |
| H  | 4.754118  | 0.306127  | -1.271990 |
| Cl | 0.428387  | -1.826730 | 1.577433  |
| N  | 0.711024  | 1.142817  | 0.710205  |
| N  | -0.454034 | 0.824315  | 0.427086  |
| C  | -1.693733 | 0.526368  | 0.131381  |
| C  | -2.155163 | -0.514971 | -0.720473 |
| C  | -2.902871 | 1.170180  | 0.587740  |
| N  | -3.963950 | 0.587481  | 0.079546  |
| N  | -3.483412 | -0.420752 | -0.717275 |
| C  | -4.428104 | -1.190227 | -1.487106 |
| H  | -5.402885 | -1.075136 | -1.014529 |
| H  | -4.482568 | -0.827802 | -2.518813 |
| H  | -4.142715 | -2.244425 | -1.490918 |
| C  | -1.376564 | -1.487140 | -1.518169 |
| H  | -0.314395 | -1.334057 | -1.316993 |
| H  | -1.631579 | -2.519361 | -1.256017 |
| H  | -1.547992 | -1.358809 | -2.592578 |
| C  | -2.991386 | 2.308942  | 1.534345  |
| H  | -2.755308 | 1.983841  | 2.552968  |
| H  | -2.261772 | 3.078476  | 1.267173  |

|                                              |           |           |           |
|----------------------------------------------|-----------|-----------|-----------|
| H                                            | -3.996135 | 2.734448  | 1.527652  |
| H                                            | 4.740452  | -2.095189 | -0.600726 |
| 30                                           |           |           |           |
| 4pzMeCl2-ts-H-n ; E = -1602.72737419 Hartree |           |           |           |
| C                                            | -1.901144 | -1.168221 | -0.542617 |
| C                                            | -3.068908 | -1.830365 | -0.179288 |
| C                                            | -1.749152 | 0.208584  | -0.355638 |
| H                                            | -3.151921 | -2.897797 | -0.351745 |
| C                                            | -4.112115 | -1.111592 | 0.391146  |
| C                                            | -2.827145 | 0.903271  | 0.198763  |
| Cl                                           | -2.683006 | 2.616747  | 0.450373  |
| C                                            | -3.995863 | 0.260397  | 0.585252  |
| H                                            | -4.798835 | 0.835042  | 1.033297  |
| Cl                                           | -0.633504 | -2.095184 | -1.300058 |
| N                                            | -0.610911 | 0.962956  | -0.826949 |
| N                                            | 0.487159  | 0.579059  | -0.394494 |
| C                                            | 1.669343  | 0.234536  | 0.050250  |
| C                                            | 2.923269  | 0.709769  | -0.418329 |
| C                                            | 2.013921  | -0.687331 | 1.108489  |
| N                                            | 3.316884  | -0.756479 | 1.258581  |
| N                                            | 3.844184  | 0.086770  | 0.313859  |
| C                                            | 5.277968  | 0.143082  | 0.182464  |
| H                                            | 5.711451  | -0.033107 | 1.166845  |
| H                                            | 5.637321  | -0.625282 | -0.509474 |
| H                                            | 5.579173  | 1.126409  | -0.182537 |
| C                                            | 3.185281  | 1.669537  | -1.512165 |
| H                                            | 2.223588  | 2.051454  | -1.863149 |
| H                                            | 3.795946  | 2.513452  | -1.174121 |
| H                                            | 3.700055  | 1.197996  | -2.356234 |
| C                                            | 1.077273  | -1.438181 | 1.981034  |
| H                                            | 0.473064  | -0.750215 | 2.580873  |
| H                                            | 0.385994  | -2.032253 | 1.376702  |
| H                                            | 1.632069  | -2.096650 | 2.651241  |
| H                                            | -5.024799 | -1.622683 | 0.679823  |
| 30                                           |           |           |           |
| 4pzMeFlA-ts-B-m ; E = -783.003123547 Hartree |           |           |           |
| C                                            | 2.518209  | 0.196039  | 0.877011  |
| C                                            | 3.793923  | 0.676288  | 0.703130  |
| C                                            | 1.874555  | -0.625054 | -0.080112 |
| H                                            | 4.219029  | 1.294560  | 1.487499  |
| C                                            | 4.498445  | 0.377701  | -0.465927 |
| C                                            | 2.604042  | -0.920975 | -1.257798 |
| H                                            | 2.137992  | -1.544102 | -2.012554 |
| C                                            | 3.882716  | -0.409767 | -1.434288 |
| H                                            | 4.410861  | -0.649920 | -2.352647 |
| F                                            | 1.807078  | 0.511872  | 1.983369  |
| N                                            | 0.651503  | -1.067023 | 0.138857  |
| N                                            | -0.489148 | -1.502347 | 0.277909  |
| C                                            | -1.550432 | -0.626898 | 0.059997  |
| C                                            | -1.573666 | 0.755337  | -0.169487 |
| C                                            | -2.907320 | -1.042540 | 0.071758  |
| N                                            | -3.703131 | -0.009915 | -0.142753 |
| N                                            | -2.877118 | 1.060408  | -0.281115 |
| C                                            | -3.469449 | 2.360438  | -0.490320 |
| H                                            | -3.288286 | 3.018297  | 0.364650  |
| H                                            | -3.075476 | 2.827015  | -1.396778 |
| H                                            | -4.540644 | 2.200489  | -0.600824 |
| C                                            | -0.471836 | 1.748048  | -0.233139 |



|   |           |           |           |
|---|-----------|-----------|-----------|
| H | 0.169683  | 1.649065  | 0.647008  |
| H | 0.163415  | 1.579007  | -1.108267 |
| H | -0.852546 | 2.770786  | -0.274534 |
| C | -3.441932 | -2.415911 | 0.269248  |
| H | -3.033566 | -2.863909 | 1.179128  |
| H | -4.530333 | -2.381260 | 0.340930  |
| H | -3.165212 | -3.068843 | -0.564194 |
| H | 5.503110  | 0.757857  | -0.610463 |

30

4pzMeFlA-ts-B-n ; E = -783.004922900 Hartree

|   |           |           |           |
|---|-----------|-----------|-----------|
| C | -2.608376 | -0.276088 | 0.854214  |
| C | -3.919580 | -0.658509 | 0.701972  |
| C | -1.964776 | 0.608898  | -0.044528 |
| H | -4.343998 | -1.333706 | 1.438257  |
| C | -4.659193 | -0.196480 | -0.389706 |
| C | -2.730970 | 1.074662  | -1.140021 |
| H | -2.263977 | 1.748861  | -1.848923 |
| C | -4.044569 | 0.655424  | -1.302381 |
| H | -4.600527 | 1.021482  | -2.160752 |
| F | -1.868303 | -0.745308 | 1.881462  |
| N | -0.706751 | 0.952975  | 0.153335  |
| N | 0.460266  | 1.287846  | 0.336668  |
| C | 1.456562  | 0.360753  | 0.037518  |
| C | 2.805867  | 0.694611  | 0.147305  |
| C | 1.424751  | -1.002812 | -0.380785 |
| N | 2.658282  | -1.456061 | -0.515182 |
| N | 3.474874  | -0.419078 | -0.193231 |
| C | 4.901576  | -0.594077 | -0.294851 |
| H | 5.094353  | -1.665464 | -0.328265 |
| H | 5.294541  | -0.128006 | -1.204282 |
| H | 5.400398  | -0.159526 | 0.574731  |
| C | 3.438993  | 1.975897  | 0.542277  |
| H | 4.047092  | 2.393206  | -0.267638 |
| H | 2.653049  | 2.690744  | 0.791196  |
| H | 4.086917  | 1.851668  | 1.416766  |
| C | 0.249341  | -1.883087 | -0.612520 |
| H | -0.376998 | -1.931701 | 0.283003  |
| H | -0.381195 | -1.504163 | -1.422681 |
| H | 0.591502  | -2.887724 | -0.867845 |
| H | -5.690893 | -0.502822 | -0.518826 |

30

4pzMeFlA-ts-H-m ; E = -782.998860638 Hartree

|   |           |           |           |
|---|-----------|-----------|-----------|
| C | 2.142306  | -0.435787 | 0.641703  |
| C | 3.296198  | -1.196140 | 0.742203  |
| C | 2.084148  | 0.720483  | -0.143211 |
| H | 3.288574  | -2.077875 | 1.374712  |
| C | 4.434115  | -0.802452 | 0.043916  |
| C | 3.251218  | 1.116848  | -0.798516 |
| H | 3.206081  | 2.037855  | -1.372703 |
| C | 4.411784  | 0.357587  | -0.728281 |
| H | 5.300687  | 0.672660  | -1.265586 |
| F | 1.066267  | -0.819169 | 1.350855  |
| N | 0.960404  | 1.608668  | -0.240147 |
| N | -0.163146 | 1.075837  | -0.179034 |
| C | -1.362131 | 0.554694  | -0.111175 |
| C | -1.740555 | -0.803330 | -0.297965 |
| C | -2.609729 | 1.230069  | 0.159525  |
| N | -3.615724 | 0.384687  | 0.151000  |

|   |           |           |           |
|---|-----------|-----------|-----------|
| N | -3.067602 | -0.831449 | -0.154428 |
| C | -3.949787 | -1.954690 | -0.343166 |
| H | -3.597243 | -2.820408 | 0.223483  |
| H | -4.931759 | -1.655054 | 0.020639  |
| H | -4.022463 | -2.225085 | -1.401790 |
| C | -0.922766 | -1.977103 | -0.677688 |
| H | 0.116395  | -1.666461 | -0.786901 |
| H | -0.968879 | -2.761319 | 0.085694  |
| H | -1.255689 | -2.412747 | -1.626429 |
| C | -2.775407 | 2.670878  | 0.472658  |
| H | -2.504656 | 2.879244  | 1.513345  |
| H | -2.110510 | 3.267298  | -0.158359 |
| H | -3.810505 | 2.980438  | 0.317918  |
| H | 5.339683  | -1.396576 | 0.116537  |

30

4pzMeFlA-ts-H-n ; E = -782.999191446 Hartree

|   |           |           |           |
|---|-----------|-----------|-----------|
| C | 2.284007  | -0.401298 | 0.664476  |
| C | 3.510815  | -1.042876 | 0.706158  |
| C | 2.088636  | 0.774887  | -0.063992 |
| H | 3.608800  | -1.948922 | 1.295219  |
| C | 4.585114  | -0.502425 | 0.005087  |
| C | 3.192229  | 1.321773  | -0.719850 |
| H | 3.040364  | 2.258432  | -1.248689 |
| C | 4.425809  | 0.683509  | -0.709087 |
| H | 5.264591  | 1.113268  | -1.247541 |
| F | 1.270580  | -0.919741 | 1.380611  |
| N | 0.873134  | 1.540195  | -0.095214 |
| N | -0.183643 | 0.880838  | -0.109188 |
| C | -1.321672 | 0.233486  | -0.160217 |
| C | -2.610309 | 0.785370  | 0.067439  |
| C | -1.586709 | -1.155493 | -0.466756 |
| N | -2.877263 | -1.402713 | -0.428123 |
| N | -3.472904 | -0.220536 | -0.078531 |
| C | -4.894597 | -0.215013 | 0.152651  |
| H | -5.329945 | 0.722698  | -0.199189 |
| H | -5.320513 | -1.049140 | -0.404279 |
| H | -5.121637 | -0.339955 | 1.216576  |
| C | -2.957095 | 2.173574  | 0.439555  |
| H | -2.047536 | 2.776008  | 0.375751  |
| H | -3.710146 | 2.597901  | -0.233033 |
| H | -3.344984 | 2.241758  | 1.462119  |
| C | -0.606743 | -2.202161 | -0.853990 |
| H | -0.084036 | -1.922920 | -1.774297 |
| H | 0.148872  | -2.320164 | -0.074539 |
| H | -1.118916 | -3.152218 | -1.014871 |
| H | 5.547696  | -1.003564 | 0.029827  |

30

4pzMeFlB-ts-B-m ; E = -783.003123653 Hartree

|   |           |           |           |
|---|-----------|-----------|-----------|
| C | -2.604040 | -0.921906 | -1.257202 |
| C | -3.882693 | -0.410816 | -1.434168 |
| C | -1.874587 | -0.625023 | -0.079736 |
| H | -4.410789 | -0.651671 | -2.352371 |
| C | -4.498478 | 0.377381  | -0.466433 |
| C | -2.518310 | 0.196748  | 0.876761  |
| F | -1.807348 | 0.513317  | 1.982902  |
| C | -3.794034 | 0.676827  | 0.702447  |
| H | -4.219210 | 1.295644  | 1.486349  |
| H | -2.137946 | -1.545609 | -2.011454 |

|   |           |           |           |
|---|-----------|-----------|-----------|
| N | -0.651541 | -1.066832 | 0.139614  |
| N | 0.489115  | -1.502079 | 0.278881  |
| C | 1.550428  | -0.626805 | 0.060446  |
| C | 1.573796  | 0.755325  | -0.169683 |
| C | 2.907263  | -1.042622 | 0.072095  |
| N | 3.703172  | -0.010203 | -0.143034 |
| N | 2.877266  | 1.060138  | -0.281844 |
| C | 3.469818  | 2.360099  | -0.490837 |
| H | 4.540259  | 2.199417  | -0.607436 |
| H | 3.071462  | 2.829254  | -1.394005 |
| H | 3.293873  | 3.016037  | 0.366725  |
| C | 0.472096  | 1.748185  | -0.233144 |
| H | -0.162800 | 1.579881  | -1.108678 |
| H | -0.169787 | 1.648613  | 0.646659  |
| H | 0.852913  | 2.770924  | -0.273529 |
| C | 3.441622  | -2.416100 | 0.269617  |
| H | 3.029075  | -2.865934 | 1.176673  |
| H | 3.169199  | -3.067602 | -0.566386 |
| H | 4.529668  | -2.381151 | 0.346362  |
| H | -5.503138 | 0.757423  | -0.611311 |

30

4pzMeFlB-ts-B-n ; E = -783.004922906 Hartree

|   |           |           |           |
|---|-----------|-----------|-----------|
| C | 2.730967  | 1.074665  | -1.139990 |
| C | 4.044569  | 0.655436  | -1.302351 |
| C | 1.964776  | 0.608892  | -0.044499 |
| H | 4.600520  | 1.021493  | -2.160727 |
| C | 4.659204  | -0.196457 | -0.389673 |
| C | 2.608391  | -0.276069 | 0.854255  |
| F | 1.868328  | -0.745269 | 1.881528  |
| C | 3.919600  | -0.658478 | 0.702014  |
| H | 4.344027  | -1.333656 | 1.438310  |
| H | 2.263968  | 1.748857  | -1.848894 |
| N | 0.706749  | 0.952964  | 0.153357  |
| N | -0.460260 | 1.287838  | 0.336727  |
| C | -1.456550 | 0.360747  | 0.037522  |
| C | -2.805860 | 0.694595  | 0.147159  |
| C | -1.424689 | -1.002790 | -0.380864 |
| N | -2.658205 | -1.456033 | -0.515443 |
| N | -3.474836 | -0.419024 | -0.193634 |
| C | -4.901602 | -0.594092 | -0.294340 |
| H | -5.399584 | -0.167238 | 0.579582  |
| H | -5.296301 | -0.120776 | -1.199252 |
| H | -5.093438 | -1.665330 | -0.336336 |
| C | -3.439245 | 1.975732  | 0.542195  |
| H | -4.087404 | 1.851231  | 1.416473  |
| H | -2.653510 | 2.690707  | 0.791397  |
| H | -4.047247 | 2.393021  | -0.267813 |
| C | -0.249237 | -1.883010 | -0.612594 |
| H | 0.381129  | -1.504206 | -1.422944 |
| H | 0.377245  | -1.931384 | 0.282842  |
| H | -0.591345 | -2.887731 | -0.867663 |
| H | 5.690905  | -0.502792 | -0.518795 |

30

4pzMeFlB-ts-H-m ; E = -782.998764796 Hartree

|   |          |           |          |
|---|----------|-----------|----------|
| C | 1.817541 | -0.791558 | 0.875763 |
| C | 2.884585 | -1.660655 | 1.069013 |
| C | 1.963734 | 0.367755  | 0.110756 |
| H | 2.758646 | -2.549280 | 1.680022 |

|   |           |           |           |
|---|-----------|-----------|-----------|
| C | 4.120994  | -1.378284 | 0.491271  |
| C | 3.221541  | 0.642684  | -0.430446 |
| F | 3.391315  | 1.752824  | -1.153469 |
| C | 4.291867  | -0.221473 | -0.264943 |
| H | 5.241117  | 0.024458  | -0.728825 |
| H | 0.851833  | -0.973190 | 1.339852  |
| N | 0.934676  | 1.355725  | -0.039452 |
| N | -0.230887 | 0.924301  | 0.012599  |
| C | -1.465196 | 0.477598  | 0.028898  |
| C | -1.940310 | -0.830802 | -0.260240 |
| C | -2.665360 | 1.230999  | 0.306259  |
| N | -3.732593 | 0.469198  | 0.211557  |
| N | -3.271847 | -0.761396 | -0.163529 |
| C | -4.230988 | -1.795507 | -0.457733 |
| H | -4.028390 | -2.694102 | 0.131901  |
| H | -5.212390 | -1.402677 | -0.195494 |
| H | -4.214066 | -2.054628 | -1.521113 |
| C | -1.199352 | -2.035348 | -0.695334 |
| H | -0.129693 | -1.872874 | -0.543665 |
| H | -1.507331 | -2.923986 | -0.134041 |
| H | -1.355987 | -2.245774 | -1.759934 |
| C | -2.728133 | 2.657935  | 0.707566  |
| H | -2.506951 | 2.778134  | 1.773645  |
| H | -1.977041 | 3.230031  | 0.155603  |
| H | -3.721766 | 3.066669  | 0.515675  |
| H | 4.959193  | -2.053064 | 0.634386  |

30

4pzMeFlB-ts-H-n ; E = -782.999188949 Hartree

|   |           |           |           |
|---|-----------|-----------|-----------|
| C | -1.966820 | 0.884034  | 0.718549  |
| C | -3.122800 | 1.646912  | 0.820582  |
| C | -1.994027 | -0.390434 | 0.151027  |
| H | -3.086466 | 2.631774  | 1.276232  |
| C | -4.332326 | 1.138081  | 0.350022  |
| C | -3.223476 | -0.887945 | -0.286438 |
| F | -3.279670 | -2.111292 | -0.821622 |
| C | -4.384783 | -0.135974 | -0.208867 |
| H | -5.309968 | -0.558974 | -0.585483 |
| H | -1.015372 | 1.245537  | 1.096669  |
| N | -0.859342 | -1.267512 | 0.097030  |
| N | 0.250265  | -0.702035 | 0.061720  |
| C | 1.428060  | -0.128392 | -0.035560 |
| C | 2.677159  | -0.774447 | 0.161591  |
| C | 1.790887  | 1.228743  | -0.382843 |
| N | 3.097958  | 1.373442  | -0.393409 |
| N | 3.610575  | 0.156542  | -0.037133 |
| C | 5.037119  | 0.032864  | 0.122568  |
| H | 5.496149  | 0.868818  | -0.404067 |
| H | 5.320423  | 0.072402  | 1.179414  |
| H | 5.386739  | -0.908804 | -0.306919 |
| C | 2.928618  | -2.180556 | 0.541875  |
| H | 3.358748  | -2.265369 | 1.546148  |
| H | 1.971494  | -2.707876 | 0.530091  |
| H | 3.612579  | -2.673297 | -0.157381 |
| C | 0.889956  | 2.352440  | -0.749716 |
| H | 0.095873  | 2.013842  | -1.419550 |
| H | 0.403988  | 2.775047  | 0.136546  |
| H | 1.461730  | 3.145249  | -1.235243 |
| H | -5.240466 | 1.728274  | 0.423939  |

30

4pzMeF2-ts-B-m ; E = -882.143178529 Hartree

|   |           |           |           |
|---|-----------|-----------|-----------|
| C | -2.600534 | -0.937043 | -0.782663 |
| C | -3.866910 | -0.453508 | -1.031242 |
| C | -1.763493 | -0.397486 | 0.223939  |
| H | -4.440049 | -0.912706 | -1.829646 |
| C | -4.387993 | 0.580671  | -0.253135 |
| C | -2.323980 | 0.668052  | 0.965445  |
| F | -1.535651 | 1.219664  | 1.912597  |
| C | -3.602689 | 1.137536  | 0.754882  |
| H | -3.961553 | 1.947694  | 1.380680  |
| F | -2.085078 | -1.929741 | -1.525895 |
| N | -0.553284 | -0.859090 | 0.455673  |
| N | 0.575785  | -1.305128 | 0.652064  |
| C | 1.663483  | -0.543704 | 0.241121  |
| C | 1.742282  | 0.745689  | -0.304400 |
| C | 3.002430  | -1.006191 | 0.340397  |
| N | 3.837521  | -0.087341 | -0.109453 |
| N | 3.054995  | 0.957926  | -0.489062 |
| C | 3.698747  | 2.142310  | -1.006730 |
| H | 3.327113  | 2.383359  | -2.005999 |
| H | 3.540314  | 2.997860  | -0.344004 |
| H | 4.763101  | 1.919799  | -1.059708 |
| C | 0.683131  | 1.740873  | -0.605329 |
| H | 0.028769  | 1.387358  | -1.408275 |
| H | 0.053144  | 1.894362  | 0.275018  |
| H | 1.106256  | 2.702275  | -0.903985 |
| C | 3.481049  | -2.318700 | 0.848838  |
| H | 3.108908  | -2.502872 | 1.860390  |
| H | 3.120644  | -3.137334 | 0.218862  |
| H | 4.572158  | -2.334395 | 0.858623  |
| H | -5.390502 | 0.949730  | -0.433566 |

30

4pzMeF2-ts-B-n ; E = -882.145235530 Hartree

|   |           |           |           |
|---|-----------|-----------|-----------|
| C | 2.433208  | 0.844680  | 0.793600  |
| C | 3.748891  | 1.183820  | 0.561423  |
| C | 1.841477  | -0.331216 | 0.277029  |
| H | 4.131008  | 2.094426  | 1.010249  |
| C | 4.540928  | 0.372997  | -0.250089 |
| C | 2.687224  | -1.130002 | -0.529208 |
| F | 2.144293  | -2.238382 | -1.058626 |
| C | 3.991548  | -0.781768 | -0.807178 |
| H | 4.569809  | -1.438318 | -1.448465 |
| F | 1.643349  | 1.632669  | 1.550128  |
| N | 0.593844  | -0.662828 | 0.532657  |
| N | -0.566666 | -0.978787 | 0.784863  |
| C | -1.587651 | -0.243527 | 0.192906  |
| C | -2.925109 | -0.586560 | 0.394134  |
| C | -1.603361 | 0.905432  | -0.653815 |
| N | -2.850885 | 1.230205  | -0.940018 |
| N | -3.631166 | 0.320660  | -0.298802 |
| C | -5.060808 | 0.383665  | -0.468904 |
| H | -5.303095 | 1.387542  | -0.815017 |
| H | -5.404166 | -0.345831 | -1.209583 |
| H | -5.563156 | 0.192887  | 0.482139  |
| C | -3.511699 | -1.697101 | 1.182068  |
| H | -4.090771 | -2.378677 | 0.549803  |
| H | -2.700969 | -2.259081 | 1.648426  |

|   |           |           |           |
|---|-----------|-----------|-----------|
| H | -4.176129 | -1.324726 | 1.969379  |
| C | -0.461547 | 1.708850  | -1.163909 |
| H | 0.148396  | 2.082065  | -0.336426 |
| H | 0.194447  | 1.107595  | -1.800928 |
| H | -0.840513 | 2.553535  | -1.742201 |
| H | 5.571864  | 0.639635  | -0.450145 |

30

4pzMeF2-ts-H-m ; E = -882.139490459 Hartree

|   |           |           |           |
|---|-----------|-----------|-----------|
| C | 1.881563  | -0.774770 | 0.752217  |
| C | 2.976028  | -1.622711 | 0.816690  |
| C | 1.909149  | 0.448233  | 0.074527  |
| H | 2.891444  | -2.552232 | 1.368668  |
| C | 4.156173  | -1.244485 | 0.184422  |
| C | 3.126624  | 0.795816  | -0.517795 |
| F | 3.203087  | 1.963006  | -1.160163 |
| C | 4.238100  | -0.030453 | -0.491644 |
| H | 5.144370  | 0.287700  | -0.994305 |
| F | 0.757697  | -1.137300 | 1.391124  |
| N | 0.857083  | 1.427790  | 0.086758  |
| N | -0.298988 | 0.971185  | 0.029203  |
| C | -1.531125 | 0.532346  | -0.013786 |
| C | -1.984835 | -0.764159 | -0.382890 |
| C | -2.744899 | 1.252478  | 0.293976  |
| N | -3.799770 | 0.484904  | 0.140691  |
| N | -3.314379 | -0.722064 | -0.288965 |
| C | -4.255927 | -1.756392 | -0.635447 |
| H | -3.977049 | -2.702904 | -0.165325 |
| H | -5.230578 | -1.438431 | -0.267588 |
| H | -4.305799 | -1.895782 | -1.720296 |
| C | -1.219614 | -1.936968 | -0.861066 |
| H | -0.161778 | -1.676192 | -0.904745 |
| H | -1.335831 | -2.793012 | -0.187564 |
| H | -1.541025 | -2.250123 | -1.860503 |
| C | -2.836082 | 2.653668  | 0.773040  |
| H | -2.571993 | 2.720797  | 1.833844  |
| H | -2.128269 | 3.282293  | 0.225633  |
| H | -3.849516 | 3.037591  | 0.644422  |
| H | 5.020405  | -1.899380 | 0.221852  |

30

4pzMeF2-ts-H-n ; E = -882.140107338 Hartree

|   |           |           |           |
|---|-----------|-----------|-----------|
| C | -2.052512 | -0.782106 | -0.727564 |
| C | -3.238367 | -1.498634 | -0.709823 |
| C | -1.924611 | 0.484652  | -0.153094 |
| H | -3.273288 | -2.474124 | -1.182032 |
| C | -4.353814 | -0.933928 | -0.099376 |
| C | -3.080582 | 1.021931  | 0.417921  |
| F | -3.006904 | 2.240148  | 0.960304  |
| C | -4.281107 | 0.332893  | 0.472705  |
| H | -5.134220 | 0.795630  | 0.955726  |
| F | -0.991510 | -1.320417 | -1.350584 |
| N | -0.760534 | 1.324381  | -0.256522 |
| N | 0.329055  | 0.743618  | -0.097610 |
| C | 1.501800  | 0.189208  | 0.082622  |
| C | 2.763059  | 0.781980  | -0.194137 |
| C | 1.837364  | -1.115563 | 0.609377  |
| N | 3.140094  | -1.282937 | 0.644203  |
| N | 3.677130  | -0.128340 | 0.137230  |
| C | 5.105602  | -0.062828 | -0.037413 |

|   |           |           |           |
|---|-----------|-----------|-----------|
| H | 5.454885  | 0.959681  | 0.118296  |
| H | 5.560080  | -0.723170 | 0.700849  |
| H | 5.394423  | -0.393654 | -1.040362 |
| C | 3.037863  | 2.117843  | -0.764976 |
| H | 2.086917  | 2.649660  | -0.848729 |
| H | 3.712151  | 2.700568  | -0.128320 |
| H | 3.488561  | 2.054193  | -1.761505 |
| C | 0.903380  | -2.154373 | 1.112829  |
| H | 0.315810  | -1.771878 | 1.953341  |
| H | 0.198953  | -2.441069 | 0.328798  |
| H | 1.461100  | -3.032418 | 1.442423  |
| H | -5.288312 | -1.484498 | -0.071500 |

34

4pzMeOMe1A-ts-B-m ; E = -798.262855518 Hartree

|   |           |           |           |
|---|-----------|-----------|-----------|
| C | 2.412689  | 0.229820  | 0.496066  |
| C | 3.692503  | 0.532637  | 0.071986  |
| C | 1.688809  | -0.840628 | -0.107280 |
| H | 4.234494  | 1.345013  | 0.544345  |
| C | 4.291838  | -0.184768 | -0.971275 |
| C | 2.305992  | -1.557889 | -1.153929 |
| C | 3.585580  | -1.213771 | -1.576841 |
| H | 4.033202  | -1.778855 | -2.389372 |
| N | 0.468900  | -1.113742 | 0.320374  |
| N | -0.667757 | -1.408261 | 0.677778  |
| C | -1.718008 | -0.612697 | 0.216467  |
| C | -1.716584 | 0.573349  | -0.527620 |
| C | -3.080642 | -0.905759 | 0.478995  |
| N | -3.859765 | 0.014905  | -0.062146 |
| N | -3.015125 | 0.895011  | -0.660384 |
| C | -3.580824 | 2.045952  | -1.322602 |
| H | -3.262378 | 2.091512  | -2.367342 |
| H | -4.662502 | 1.930236  | -1.278339 |
| H | -3.295320 | 2.972805  | -0.816444 |
| C | -0.592390 | 1.387929  | -1.053244 |
| H | 0.112169  | 1.607795  | -0.245404 |
| H | -0.032402 | 0.841149  | -1.818329 |
| H | -0.942453 | 2.328078  | -1.485220 |
| C | -3.640310 | -2.061620 | 1.228991  |
| H | -3.440990 | -3.002367 | 0.706787  |
| H | -3.183543 | -2.140271 | 2.219307  |
| H | -4.719660 | -1.942574 | 1.338437  |
| H | 5.295049  | 0.069616  | -1.294559 |
| H | 1.760110  | -2.372252 | -1.616715 |
| O | 1.714072  | 0.882672  | 1.474368  |
| C | 2.391549  | 1.900456  | 2.168510  |
| H | 3.288909  | 1.515439  | 2.669715  |
| H | 2.683977  | 2.722913  | 1.501615  |
| H | 1.693792  | 2.276943  | 2.917879  |

34

4pzMeOMe1A-ts-B-n ; E = -798.264651160 Hartree

|   |           |           |           |
|---|-----------|-----------|-----------|
| C | -2.487367 | 0.438370  | -0.366438 |
| C | -3.804931 | 0.535171  | 0.039565  |
| C | -1.787810 | -0.798773 | -0.244499 |
| H | -4.328843 | 1.479362  | -0.064082 |
| C | -4.464614 | -0.563946 | 0.604346  |
| C | -2.468527 | -1.900785 | 0.312705  |
| C | -3.783747 | -1.764357 | 0.744238  |
| H | -4.279311 | -2.625451 | 1.183215  |

|   |           |           |           |
|---|-----------|-----------|-----------|
| N | -0.529235 | -0.864421 | -0.642264 |
| N | 0.633737  | -0.928288 | -1.026856 |
| C | 1.616729  | -0.359201 | -0.214633 |
| C | 2.964630  | -0.433530 | -0.558879 |
| C | 1.567229  | 0.367037  | 1.011519  |
| N | 2.790815  | 0.705521  | 1.379513  |
| N | 3.617912  | 0.215650  | 0.420102  |
| C | 5.040776  | 0.386421  | 0.566398  |
| H | 5.484432  | 0.717336  | -0.376032 |
| H | 5.197284  | 1.147326  | 1.329738  |
| H | 5.522483  | -0.545099 | 0.881291  |
| C | 3.613136  | -1.072071 | -1.729652 |
| H | 4.301892  | -1.868251 | -1.426728 |
| H | 2.837311  | -1.505117 | -2.363184 |
| H | 4.181590  | -0.346226 | -2.321488 |
| C | 0.382159  | 0.764138  | 1.816602  |
| H | -0.308211 | 1.359757  | 1.212013  |
| H | -0.175714 | -0.110655 | 2.164520  |
| H | 0.707195  | 1.346766  | 2.680778  |
| H | -5.495512 | -0.466668 | 0.926266  |
| H | -1.939636 | -2.842333 | 0.408207  |
| O | -1.733824 | 1.445936  | -0.898041 |
| C | -2.366621 | 2.688369  | -1.076396 |
| H | -3.221176 | 2.610228  | -1.761133 |
| H | -2.713905 | 3.107698  | -0.122509 |
| H | -1.618134 | 3.353551  | -1.509263 |

34

4pzMeOMe1A-ts-H-m ; E = -798.257489312 Hartree

|   |           |           |           |
|---|-----------|-----------|-----------|
| C | -2.987070 | 0.273925  | 0.133586  |
| C | -3.946719 | -0.728480 | -0.017323 |
| C | -1.674360 | 0.049891  | -0.329897 |
| H | -4.954571 | -0.583368 | 0.353896  |
| C | -3.615422 | -1.928404 | -0.645537 |
| C | -1.369395 | -1.152402 | -0.962757 |
| C | -2.329640 | -2.145330 | -1.126874 |
| H | -2.081322 | -3.070462 | -1.637770 |
| N | -0.742603 | 1.135637  | -0.245194 |
| N | 0.456810  | 0.809798  | -0.191655 |
| C | 1.725659  | 0.483902  | -0.096026 |
| C | 2.293471  | -0.726987 | 0.382601  |
| C | 2.870457  | 1.302637  | -0.415957 |
| N | 3.992808  | 0.660888  | -0.173417 |
| N | 3.618972  | -0.548470 | 0.339063  |
| C | 4.643949  | -1.444705 | 0.808742  |
| H | 4.557013  | -2.423597 | 0.328331  |
| H | 5.601851  | -0.996601 | 0.547897  |
| H | 4.585328  | -1.573888 | 1.894244  |
| C | 1.630070  | -1.930201 | 0.931379  |
| H | 1.717387  | -1.981768 | 2.023234  |
| H | 0.565714  | -1.893194 | 0.685865  |
| H | 2.058675  | -2.851007 | 0.521583  |
| C | 2.833395  | 2.666808  | -0.998563 |
| H | 3.772282  | 3.190477  | -0.809620 |
| H | 2.672613  | 2.630243  | -2.081567 |
| H | 2.000014  | 3.228809  | -0.567420 |
| H | -4.379025 | -2.691734 | -0.762666 |
| H | -0.362644 | -1.273332 | -1.354186 |
| O | -3.216785 | 1.462793  | 0.731837  |



|   |           |          |          |
|---|-----------|----------|----------|
| C | -4.525601 | 1.731779 | 1.172480 |
| H | -5.248029 | 1.693821 | 0.346896 |
| H | -4.842453 | 1.031867 | 1.956835 |
| H | -4.503230 | 2.741829 | 1.583045 |

34

4pzMeOMe1A-ts-H-n ; E = -798.257844335 Hartree

|   |           |           |           |
|---|-----------|-----------|-----------|
| C | 3.013536  | -0.419966 | 0.050158  |
| C | 4.059668  | 0.493657  | -0.087477 |
| C | 1.708727  | -0.038032 | -0.323234 |
| H | 5.065032  | 0.226656  | 0.216711  |
| C | 3.818650  | 1.761682  | -0.615044 |
| C | 1.494013  | 1.229366  | -0.857560 |
| C | 2.538789  | 2.134722  | -1.008455 |
| H | 2.358431  | 3.114121  | -1.440506 |
| N | 0.678081  | -1.030803 | -0.254965 |
| N | -0.477709 | -0.589661 | -0.118253 |
| C | -1.702754 | -0.158509 | 0.076778  |
| C | -2.895544 | -0.848478 | -0.258363 |
| C | -2.168552 | 1.078814  | 0.662048  |
| N | -3.484529 | 1.125483  | 0.669540  |
| N | -3.899586 | -0.032191 | 0.077826  |
| C | -5.307159 | -0.214899 | -0.165632 |
| H | -5.550634 | -0.051209 | -1.220707 |
| H | -5.617270 | -1.223287 | 0.119829  |
| H | -5.837064 | 0.516176  | 0.443900  |
| C | -3.040541 | -2.168414 | -0.908637 |
| H | -3.401065 | -2.087253 | -1.940745 |
| H | -2.056872 | -2.644667 | -0.926875 |
| H | -3.736533 | -2.814056 | -0.362542 |
| C | -1.343438 | 2.144685  | 1.283964  |
| H | -0.446602 | 2.338098  | 0.688205  |
| H | -1.925054 | 3.062499  | 1.388104  |
| H | -0.999502 | 1.840888  | 2.278663  |
| H | 4.647668  | 2.454822  | -0.723617 |
| H | 0.485942  | 1.473044  | -1.182094 |
| O | 3.152802  | -1.665666 | 0.554840  |
| C | 4.447055  | -2.085257 | 0.912396  |
| H | 5.133725  | -2.060328 | 0.056263  |
| H | 4.864002  | -1.472217 | 1.722206  |
| H | 4.344893  | -3.113990 | 1.259802  |

34

4pzMeOMe1B-ts-B-m ; E = -798.262855555 Hartree

|   |           |           |           |
|---|-----------|-----------|-----------|
| C | -2.305136 | -1.557357 | -1.154731 |
| C | -3.584759 | -1.213697 | -1.577920 |
| C | -1.688700 | -0.840276 | -0.107521 |
| H | -4.031858 | -1.778728 | -2.390777 |
| C | -4.291654 | -0.185160 | -0.972310 |
| C | -2.413211 | 0.229714  | 0.495858  |
| C | -3.692945 | 0.532224  | 0.071326  |
| H | -4.235379 | 1.344314  | 0.543669  |
| N | -0.468895 | -1.113131 | 0.320612  |
| N | 0.667722  | -1.407658 | 0.678109  |
| C | 1.718123  | -0.612376 | 0.216668  |
| C | 1.717037  | 0.573559  | -0.527611 |
| C | 3.080679  | -0.905757 | 0.479268  |
| N | 3.860060  | 0.014634  | -0.061958 |
| N | 3.015667  | 0.894877  | -0.660340 |
| C | 3.581676  | 2.045754  | -1.322409 |

|   |           |           |           |
|---|-----------|-----------|-----------|
| H | 3.262907  | 2.091745  | -2.367027 |
| H | 3.296758  | 2.972596  | -0.815896 |
| H | 4.663315  | 1.929539  | -1.278525 |
| C | 0.593084  | 1.388740  | -1.052833 |
| H | 0.032968  | 0.842613  | -1.818288 |
| H | -0.111446 | 1.608301  | -0.244881 |
| H | 0.943427  | 2.329064  | -1.484199 |
| C | 3.639999  | -2.061762 | 1.229312  |
| H | 4.719135  | -1.942188 | 1.340282  |
| H | 3.181886  | -2.141314 | 2.218925  |
| H | 3.441971  | -3.002296 | 0.706217  |
| H | -5.294858 | 0.068903  | -1.295867 |
| O | -1.715142 | 0.882660  | 1.474491  |
| C | -2.393676 | 1.899104  | 2.169563  |
| H | -2.686277 | 2.722234  | 1.503574  |
| H | -3.291059 | 1.512841  | 2.669763  |
| H | -1.696583 | 2.275101  | 2.919798  |
| H | -1.758746 | -2.371332 | -1.617598 |

34

4pzMeOMe1B-ts-B-n ; E = -798.264651155 Hartree

|   |           |           |           |
|---|-----------|-----------|-----------|
| C | 2.468297  | -1.900864 | 0.312575  |
| C | 3.783487  | -1.764605 | 0.744246  |
| C | 1.787746  | -0.798736 | -0.244610 |
| H | 4.278915  | -2.625784 | 1.183208  |
| C | 4.464493  | -0.564252 | 0.604519  |
| C | 2.487449  | 0.438336  | -0.366401 |
| C | 3.804979  | 0.534973  | 0.039755  |
| H | 4.328995  | 1.479120  | -0.063765 |
| N | 0.529200  | -0.864218 | -0.642496 |
| N | -0.633778 | -0.928012 | -1.027078 |
| C | -1.616755 | -0.359044 | -0.214750 |
| C | -2.964668 | -0.433417 | -0.558926 |
| C | -1.567227 | 0.367061  | 1.011485  |
| N | -2.790811 | 0.705419  | 1.379595  |
| N | -3.617938 | 0.215587  | 0.420183  |
| C | -5.040811 | 0.386224  | 0.566605  |
| H | -5.484587 | 0.716959  | -0.375830 |
| H | -5.522385 | -0.545308 | 0.881670  |
| H | -5.197350 | 1.147212  | 1.329858  |
| C | -3.613197 | -1.071812 | -1.729769 |
| H | -4.180995 | -0.345726 | -2.321943 |
| H | -2.837438 | -1.505448 | -2.362979 |
| H | -4.302557 | -1.867489 | -1.426906 |
| C | -0.382128 | 0.764195  | 1.816508  |
| H | 0.175713  | -0.110584 | 2.164515  |
| H | 0.308254  | 1.359721  | 1.211843  |
| H | -0.707128 | 1.346926  | 2.680629  |
| H | 5.495367  | -0.467103 | 0.926554  |
| O | 1.734064  | 1.446025  | -0.897999 |
| C | 2.367021  | 2.688395  | -1.076226 |
| H | 2.714249  | 3.107640  | -0.122281 |
| H | 3.221641  | 2.610190  | -1.760874 |
| H | 1.618656  | 3.353683  | -1.509141 |
| H | 1.939312  | -2.842376 | 0.407936  |

34

4pzMeOMe1B-ts-H-m ; E = -798.257730523 Hartree

|   |          |          |           |
|---|----------|----------|-----------|
| C | 3.120486 | 1.463268 | -0.791091 |
| C | 4.313096 | 0.757483 | -0.891426 |

|   |           |           |           |
|---|-----------|-----------|-----------|
| C | 1.997880  | 0.913743  | -0.177868 |
| H | 5.168945  | 1.194216  | -1.395964 |
| C | 4.396138  | -0.510757 | -0.328328 |
| C | 2.099410  | -0.362186 | 0.420916  |
| C | 3.302688  | -1.064597 | 0.334716  |
| H | 3.397918  | -2.044877 | 0.787772  |
| N | 0.849615  | 1.770915  | -0.119496 |
| N | -0.259371 | 1.207698  | -0.125321 |
| C | -1.451278 | 0.667210  | -0.113614 |
| C | -1.820565 | -0.628011 | -0.564029 |
| C | -2.691937 | 1.242933  | 0.347419  |
| N | -3.688069 | 0.395768  | 0.203643  |
| N | -3.143538 | -0.713114 | -0.379550 |
| C | -4.025454 | -1.772283 | -0.796028 |
| H | -3.626139 | -2.745286 | -0.498052 |
| H | -4.983211 | -1.605139 | -0.304507 |
| H | -4.170165 | -1.763559 | -1.881729 |
| C | -1.000332 | -1.666471 | -1.226764 |
| H | -1.281191 | -1.802145 | -2.277903 |
| H | 0.046218  | -1.360555 | -1.186003 |
| H | -1.101085 | -2.637983 | -0.729923 |
| C | -2.858790 | 2.578661  | 0.972034  |
| H | -3.902514 | 2.895104  | 0.927635  |
| H | -2.547250 | 2.565003  | 2.022178  |
| H | -2.227024 | 3.309234  | 0.458695  |
| H | 5.320772  | -1.077294 | -0.387071 |
| O | 1.009375  | -0.820267 | 1.086377  |
| C | 1.131522  | -2.025040 | 1.801781  |
| H | 1.316109  | -2.877483 | 1.134273  |
| H | 1.935233  | -1.975413 | 2.547230  |
| H | 0.176833  | -2.169115 | 2.309325  |
| H | 3.013905  | 2.464849  | -1.198211 |

34

4pzMeOMe1B-ts-H-n ; E = -798.257532508 Hartree

|   |           |           |           |
|---|-----------|-----------|-----------|
| C | -3.088793 | 1.680476  | 0.514380  |
| C | -4.347018 | 1.100162  | 0.619087  |
| C | -1.994240 | 0.964499  | 0.038127  |
| H | -5.181946 | 1.667105  | 1.018143  |
| C | -4.521370 | -0.212602 | 0.196837  |
| C | -2.185650 | -0.357703 | -0.421041 |
| C | -3.453390 | -0.934947 | -0.332093 |
| H | -3.617829 | -1.949292 | -0.677310 |
| N | -0.767805 | 1.703259  | -0.046210 |
| N | 0.280644  | 1.052166  | 0.109041  |
| C | 1.417502  | 0.420980  | 0.263433  |
| C | 2.688099  | 0.836483  | -0.209349 |
| C | 1.682476  | -0.843632 | 0.910856  |
| N | 2.960750  | -1.150788 | 0.831779  |
| N | 3.540093  | -0.140546 | 0.119510  |
| C | 4.928490  | -0.261380 | -0.242036 |
| H | 5.453447  | 0.681176  | -0.067000 |
| H | 5.358509  | -1.040389 | 0.386563  |
| H | 5.041073  | -0.542451 | -1.294617 |
| C | 3.030156  | 2.051031  | -0.980448 |
| H | 3.275758  | 1.826422  | -2.025044 |
| H | 2.161101  | 2.713772  | -0.970186 |
| H | 3.883913  | 2.580546  | -0.544176 |
| C | 0.719345  | -1.670499 | 1.681778  |

|   |           |           |           |
|---|-----------|-----------|-----------|
| H | -0.276772 | -1.582471 | 1.243641  |
| H | 1.033083  | -2.716615 | 1.689076  |
| H | 0.655844  | -1.331152 | 2.721593  |
| H | -5.497356 | -0.684405 | 0.262068  |
| O | -1.112340 | -0.983262 | -0.964903 |
| C | -1.304978 | -2.260086 | -1.524207 |
| H | -1.605055 | -2.994326 | -0.765208 |
| H | -2.056376 | -2.243452 | -2.323905 |
| H | -0.339748 | -2.552843 | -1.938791 |
| H | -2.908469 | 2.709148  | 0.813590  |

38

4pzMeOMe2-ts-B-m ; E = -912.662873854 Hartree

|   |           |           |           |
|---|-----------|-----------|-----------|
| C | 2.460387  | -1.055712 | 0.140493  |
| C | 3.714023  | -0.640407 | 0.568365  |
| C | 1.526342  | -0.115680 | -0.367849 |
| H | 4.416955  | -1.365228 | 0.962702  |
| C | 4.082833  | 0.700853  | 0.472385  |
| C | 1.909853  | 1.249762  | -0.415204 |
| C | 3.183417  | 1.641576  | -0.024418 |
| H | 3.473147  | 2.684181  | -0.089774 |
| N | 0.331732  | -0.497006 | -0.781014 |
| N | -0.774837 | -0.803808 | -1.217725 |
| C | -1.893327 | -0.435906 | -0.468249 |
| C | -2.008214 | 0.235688  | 0.754382  |
| C | -3.219612 | -0.735599 | -0.871633 |
| N | -4.084957 | -0.284830 | 0.020602  |
| N | -3.330993 | 0.295281  | 0.990490  |
| C | -4.005046 | 0.885343  | 2.121603  |
| H | -5.071305 | 0.733611  | 1.961879  |
| H | -3.705788 | 0.400614  | 3.055192  |
| H | -3.797686 | 1.957149  | 2.188630  |
| C | -0.970806 | 0.794617  | 1.656824  |
| H | -0.289428 | 0.007843  | 1.994377  |
| H | -0.363661 | 1.528585  | 1.119023  |
| H | -1.412489 | 1.271240  | 2.534869  |
| C | -3.662936 | -1.443866 | -2.101938 |
| H | -4.749719 | -1.544907 | -2.098137 |
| H | -3.359997 | -0.896261 | -2.999265 |
| H | -3.210466 | -2.437589 | -2.164397 |
| H | 5.071778  | 1.013120  | 0.788809  |
| O | 0.929753  | 2.077124  | -0.889327 |
| C | 1.265974  | 3.431471  | -1.058795 |
| H | 1.537890  | 3.906856  | -0.106506 |
| H | 2.097086  | 3.553796  | -1.765143 |
| H | 0.376779  | 3.918842  | -1.461377 |
| O | 1.981161  | -2.329359 | 0.189305  |
| C | 2.861912  | -3.324636 | 0.644840  |
| H | 3.764321  | -3.383754 | 0.021944  |
| H | 3.162240  | -3.154919 | 1.687696  |
| H | 2.317623  | -4.267778 | 0.578329  |

38

4pzMeOMe2-ts-B-n ; E = -912.664763212 Hartree

|   |          |           |           |
|---|----------|-----------|-----------|
| C | 2.497542 | -1.133133 | 0.012137  |
| C | 3.796970 | -0.824368 | 0.391763  |
| C | 1.593731 | -0.103753 | -0.357720 |
| H | 4.476350 | -1.616195 | 0.685617  |
| C | 4.239427 | 0.497418  | 0.375397  |
| C | 2.056560 | 1.237014  | -0.331300 |

|   |           |           |           |
|---|-----------|-----------|-----------|
| C | 3.372484  | 1.523824  | 0.006809  |
| H | 3.721560  | 2.550057  | 0.001933  |
| N | 0.353758  | -0.383234 | -0.716345 |
| N | -0.792370 | -0.610673 | -1.091621 |
| C | -1.838651 | -0.235449 | -0.245877 |
| C | -3.165332 | -0.459254 | -0.606067 |
| C | -1.884034 | 0.373514  | 1.042595  |
| N | -3.141006 | 0.511732  | 1.428777  |
| N | -3.897821 | 0.007431  | 0.420299  |
| C | -5.331485 | -0.009396 | 0.556331  |
| H | -5.807920 | 0.449188  | -0.314696 |
| H | -5.706646 | -1.031484 | 0.671505  |
| H | -5.574527 | 0.565889  | 1.448482  |
| C | -3.727098 | -1.070837 | -1.834460 |
| H | -4.360397 | -0.365503 | -2.384069 |
| H | -2.900726 | -1.371893 | -2.480488 |
| H | -4.333079 | -1.954321 | -1.605452 |
| C | -0.760278 | 0.826807  | 1.903813  |
| H | -0.095967 | -0.005668 | 2.155507  |
| H | -0.152772 | 1.571785  | 1.382289  |
| H | -1.157643 | 1.257227  | 2.825245  |
| H | 5.261643  | 0.727974  | 0.654123  |
| O | 1.106512  | 2.150924  | -0.688114 |
| C | 1.499854  | 3.499959  | -0.720368 |
| H | 1.839678  | 3.848250  | 0.264241  |
| H | 2.300609  | 3.668814  | -1.452080 |
| H | 0.616823  | 4.068171  | -1.016239 |
| O | 1.946949  | -2.378375 | -0.008825 |
| C | 2.785254  | -3.451309 | 0.336447  |
| H | 3.652376  | -3.521486 | -0.333841 |
| H | 3.143698  | -3.369487 | 1.371420  |
| H | 2.181663  | -4.354722 | 0.237247  |

38

4pzMeOMe2-ts-H-m ; E = -912.657076258 Hartree

|   |           |           |           |
|---|-----------|-----------|-----------|
| C | 2.934613  | -0.616354 | 0.222884  |
| C | 3.965387  | 0.306212  | 0.412079  |
| C | 1.667570  | -0.197941 | -0.225630 |
| H | 4.933684  | -0.008754 | 0.780722  |
| C | 3.735942  | 1.647186  | 0.127323  |
| C | 1.469807  | 1.165191  | -0.519748 |
| C | 2.505016  | 2.087587  | -0.340994 |
| H | 2.359127  | 3.136614  | -0.567823 |
| N | 0.711656  | -1.227432 | -0.511491 |
| N | -0.476582 | -0.944637 | -0.276935 |
| C | -1.745942 | -0.693325 | -0.078280 |
| C | -2.303948 | 0.319442  | 0.744959  |
| C | -2.896875 | -1.367677 | -0.629020 |
| N | -4.014669 | -0.825204 | -0.196509 |
| N | -3.630479 | 0.174818  | 0.653363  |
| C | -4.648484 | 0.878822  | 1.388642  |
| H | -4.467207 | 1.956511  | 1.360776  |
| H | -5.602159 | 0.656832  | 0.910943  |
| H | -4.682445 | 0.550057  | 2.432912  |
| C | -1.620192 | 1.296867  | 1.620150  |
| H | -1.795525 | 1.090641  | 2.682544  |
| H | -0.547046 | 1.236589  | 1.429287  |
| H | -1.955784 | 2.321007  | 1.421896  |
| C | -2.873479 | -2.487887 | -1.602153 |

|   |           |           |           |
|---|-----------|-----------|-----------|
| H | -3.826511 | -3.020123 | -1.599069 |
| H | -2.685683 | -2.122663 | -2.617738 |
| H | -2.061624 | -3.177313 | -1.353659 |
| H | 4.536947  | 2.365910  | 0.272135  |
| O | 0.249958  | 1.503845  | -1.008755 |
| C | 0.059651  | 2.824207  | -1.453043 |
| H | 0.133168  | 3.545779  | -0.628391 |
| H | 0.780933  | 3.099449  | -2.232817 |
| H | -0.949194 | 2.857067  | -1.866710 |
| O | 3.051768  | -1.938637 | 0.476318  |
| C | 4.312984  | -2.420273 | 0.870816  |
| H | 5.083577  | -2.206428 | 0.118996  |
| H | 4.627100  | -1.997577 | 1.834258  |
| H | 4.203062  | -3.500413 | 0.974327  |

38

4pzMeOMe2-ts-H-n ; E = -912.656984075 Hartree

|   |           |           |           |
|---|-----------|-----------|-----------|
| C | 2.927085  | -0.779551 | 0.082036  |
| C | 4.052398  | 0.028417  | 0.256099  |
| C | 1.682175  | -0.216279 | -0.253191 |
| H | 5.006341  | -0.398638 | 0.539497  |
| C | 3.936525  | 1.400604  | 0.068158  |
| C | 1.598867  | 1.174827  | -0.452406 |
| C | 2.727627  | 1.983061  | -0.289565 |
| H | 2.669961  | 3.053829  | -0.441849 |
| N | 0.614393  | -1.130694 | -0.536725 |
| N | -0.520990 | -0.764895 | -0.184302 |
| C | -1.744312 | -0.433403 | 0.146214  |
| C | -2.945489 | -0.964071 | -0.388313 |
| C | -2.193861 | 0.554732  | 1.099045  |
| N | -3.508907 | 0.612417  | 1.131354  |
| N | -3.939355 | -0.293790 | 0.203117  |
| C | -5.349830 | -0.378943 | -0.072264 |
| H | -5.868786 | 0.118476  | 0.746440  |
| H | -5.600801 | 0.118994  | -1.014991 |
| H | -5.667232 | -1.423499 | -0.125919 |
| C | -3.108399 | -1.998375 | -1.432395 |
| H | -3.494643 | -1.584359 | -2.371098 |
| H | -2.125979 | -2.434947 | -1.629575 |
| H | -3.791065 | -2.793306 | -1.113141 |
| C | -1.342279 | 1.359478  | 2.011012  |
| H | -0.410078 | 1.622983  | 1.506212  |
| H | -1.866304 | 2.264222  | 2.326195  |
| H | -1.080671 | 0.788927  | 2.908940  |
| H | 4.810344  | 2.031130  | 0.202439  |
| O | 0.390299  | 1.655311  | -0.839142 |
| C | 0.294947  | 3.020340  | -1.165240 |
| H | 0.492148  | 3.660498  | -0.295510 |
| H | 0.983317  | 3.293917  | -1.974958 |
| H | -0.732970 | 3.176871  | -1.494496 |
| O | 2.930344  | -2.121712 | 0.247136  |
| C | 4.159756  | -2.742093 | 0.532409  |
| H | 4.903089  | -2.553515 | -0.252996 |
| H | 4.568186  | -2.412197 | 1.496705  |
| H | 3.952745  | -3.811911 | 0.580446  |

42

4pzMePyrlA-ts-B-m ; E = -895.029461975 Hartree

|   |          |           |           |
|---|----------|-----------|-----------|
| C | 2.248342 | -0.247790 | -0.003120 |
| C | 3.470780 | -0.589031 | 0.560752  |

|   |           |           |           |
|---|-----------|-----------|-----------|
| C | 1.385049  | -1.293878 | -0.453866 |
| H | 4.121761  | 0.206373  | 0.909948  |
| C | 3.869820  | -1.918258 | 0.713359  |
| C | 1.809891  | -2.636392 | -0.332387 |
| C | 3.029070  | -2.929102 | 0.262843  |
| H | 3.319879  | -3.970598 | 0.368338  |
| N | 0.196579  | -0.997282 | -0.956395 |
| N | -0.928524 | -0.812062 | -1.415784 |
| C | -1.954540 | -0.513562 | -0.518951 |
| C | -1.926620 | -0.244166 | 0.855439  |
| C | -3.311657 | -0.387930 | -0.913177 |
| N | -4.064300 | -0.077258 | 0.127845  |
| N | -3.207107 | 0.005533  | 1.179388  |
| C | -3.737755 | 0.374553  | 2.469752  |
| H | -3.461399 | -0.361406 | 3.228971  |
| H | -3.380304 | 1.362100  | 2.776604  |
| H | -4.821296 | 0.400452  | 2.366296  |
| C | -0.788228 | -0.168152 | 1.803487  |
| H | -1.087460 | 0.267037  | 2.759763  |
| H | -0.361468 | -1.158854 | 1.990239  |
| H | 0.008421  | 0.440105  | 1.357928  |
| C | -3.891873 | -0.579650 | -2.269088 |
| H | -3.830321 | -1.627634 | -2.578528 |
| H | -4.940320 | -0.276458 | -2.268581 |
| H | -3.345490 | 0.007812  | -3.011913 |
| H | 4.824096  | -2.151058 | 1.173122  |
| C | 1.079631  | 3.063068  | -1.124306 |
| C | 1.576090  | 1.648495  | -1.429181 |
| N | 1.761191  | 1.073475  | -0.095648 |
| C | 2.433225  | 2.115374  | 0.658657  |
| C | 1.650517  | 3.375625  | 0.279090  |
| H | 1.412081  | 3.775875  | -1.883112 |
| H | 0.874339  | 1.061631  | -2.024333 |
| H | 2.415943  | 1.886450  | 1.728890  |
| H | 2.290828  | 4.261484  | 0.287121  |
| H | 2.537568  | 1.676764  | -1.971277 |
| H | -0.013314 | 3.085377  | -1.108087 |
| H | 0.840697  | 3.550158  | 0.992763  |
| H | 3.490528  | 2.225626  | 0.354370  |
| H | 1.149905  | -3.423291 | -0.680175 |

42

4pzMePyr1A-ts-B-n ; E = -895.030481512 Hartree

|   |           |           |           |
|---|-----------|-----------|-----------|
| C | -2.346148 | 0.114631  | -0.052709 |
| C | -3.639631 | 0.333003  | 0.403455  |
| C | -1.572798 | 1.236491  | -0.483207 |
| H | -4.223323 | -0.518975 | 0.738025  |
| C | -4.191109 | 1.613902  | 0.472970  |
| C | -2.152696 | 2.524221  | -0.457687 |
| C | -3.436023 | 2.698395  | 0.041793  |
| H | -3.847462 | 3.702980  | 0.084518  |
| N | -0.321642 | 1.053704  | -0.876649 |
| N | 0.837738  | 0.884303  | -1.245512 |
| C | 1.797904  | 0.612527  | -0.269225 |
| C | 3.138337  | 0.442506  | -0.610226 |
| C | 1.729644  | 0.435068  | 1.144672  |
| N | 2.935730  | 0.176172  | 1.619815  |
| N | 3.770821  | 0.189942  | 0.548103  |
| C | 5.172790  | -0.076890 | 0.744205  |

|   |           |           |           |
|---|-----------|-----------|-----------|
| H | 5.783169  | 0.733001  | 0.334556  |
| H | 5.336299  | -0.147052 | 1.818505  |
| H | 5.465387  | -1.019349 | 0.270529  |
| C | 3.800433  | 0.508919  | -1.935323 |
| H | 4.302161  | -0.432764 | -2.183593 |
| H | 3.042364  | 0.711280  | -2.693724 |
| H | 4.551421  | 1.305892  | -1.972344 |
| C | 0.540766  | 0.484782  | 2.034757  |
| H | 0.074579  | 1.474870  | 2.021576  |
| H | -0.214995 | -0.226400 | 1.686101  |
| H | 0.838903  | 0.244683  | 3.057176  |
| H | -5.196817 | 1.753272  | 0.854534  |
| C | -0.718557 | -3.068268 | -0.936693 |
| C | -1.379434 | -1.751366 | -1.347110 |
| N | -1.709148 | -1.142478 | -0.059166 |
| C | -2.289011 | -2.222630 | 0.716436  |
| C | -1.337304 | -3.391942 | 0.443842  |
| H | -0.895774 | -3.854708 | -1.674841 |
| H | -0.728899 | -1.107570 | -1.941703 |
| H | -2.357202 | -1.942498 | 1.772219  |
| H | -1.866698 | -4.348297 | 0.454935  |
| H | -2.297564 | -1.937543 | -1.932592 |
| H | 0.362886  | -2.933664 | -0.848375 |
| H | -0.560148 | -3.436972 | 1.211282  |
| H | -3.306749 | -2.479997 | 0.368318  |
| H | -1.559017 | 3.368211  | -0.790948 |

42

4pzMePyr1A-ts-H-m ; E = -895.026095654 Hartree

|   |           |           |           |
|---|-----------|-----------|-----------|
| C | 2.896350  | -2.179812 | -0.103201 |
| C | 4.008023  | -1.867226 | 0.666878  |
| C | 1.891334  | -1.246183 | -0.344112 |
| H | 4.763806  | -2.617093 | 0.876961  |
| C | 4.115383  | -0.580904 | 1.188090  |
| C | 2.056888  | 0.100884  | 0.072370  |
| C | 3.165671  | 0.388609  | 0.889725  |
| H | 3.304712  | 1.393098  | 1.272915  |
| N | 0.721351  | -1.800102 | -0.978142 |
| N | -0.361454 | -1.368981 | -0.536615 |
| C | -1.530395 | -0.937655 | -0.125612 |
| C | -1.811010 | -0.182324 | 1.044211  |
| C | -2.820169 | -1.103919 | -0.751636 |
| N | -3.764418 | -0.511928 | -0.053024 |
| N | -3.134650 | 0.014129  | 1.040090  |
| C | -3.937969 | 0.625873  | 2.066809  |
| H | -3.497691 | 1.574642  | 2.384293  |
| H | -4.924075 | 0.805370  | 1.639922  |
| H | -4.035332 | -0.031189 | 2.937594  |
| C | -0.905720 | 0.239496  | 2.136020  |
| H | -1.139841 | -0.268204 | 3.079094  |
| H | 0.118705  | -0.008571 | 1.852644  |
| H | -0.967947 | 1.318709  | 2.317118  |
| C | -3.085111 | -1.784030 | -2.043944 |
| H | -2.476936 | -2.689891 | -2.119117 |
| H | -4.142522 | -2.039179 | -2.134026 |
| H | -2.812636 | -1.143042 | -2.889876 |
| H | 4.962889  | -0.313210 | 1.812819  |
| C | 0.459791  | 2.616273  | -1.979344 |
| C | 0.602525  | 1.127938  | -1.664228 |



|   |           |           |           |
|---|-----------|-----------|-----------|
| N | 1.178760  | 1.098579  | -0.314904 |
| C | 1.328117  | 2.445582  | 0.206721  |
| C | 0.311623  | 3.242549  | -0.595480 |
| H | 1.369471  | 2.995187  | -2.459018 |
| H | 1.251739  | 0.599434  | -2.371654 |
| H | 1.147252  | 2.464919  | 1.288460  |
| H | -0.697087 | 3.066222  | -0.204374 |
| H | 2.341440  | 2.847139  | 0.032104  |
| H | 0.508028  | 4.317406  | -0.575219 |
| H | -0.382178 | 2.820324  | -2.645595 |
| H | -0.375298 | 0.636570  | -1.684239 |
| H | 2.734387  | -3.181426 | -0.492254 |

42

4pzMePyrlA-ts-H-n ; E = -895.024254913 Hartree

|   |           |           |           |
|---|-----------|-----------|-----------|
| C | 3.175439  | -2.012352 | -0.114171 |
| C | 4.402927  | -1.496558 | 0.278378  |
| C | 2.052546  | -1.199140 | -0.252058 |
| H | 5.258157  | -2.150699 | 0.414673  |
| C | 4.509486  | -0.128560 | 0.507569  |
| C | 2.174294  | 0.208364  | -0.110252 |
| C | 3.418937  | 0.709438  | 0.300641  |
| H | 3.542710  | 1.778008  | 0.437687  |
| N | 0.846987  | -1.928969 | -0.537403 |
| N | -0.196107 | -1.439045 | -0.065286 |
| C | -1.339308 | -0.941273 | 0.332708  |
| C | -2.611456 | -1.144195 | -0.259131 |
| C | -1.593227 | 0.000937  | 1.398730  |
| N | -2.868303 | 0.333163  | 1.433578  |
| N | -3.453121 | -0.335446 | 0.398532  |
| C | -4.831976 | -0.058222 | 0.090578  |
| H | -4.919775 | 0.586672  | -0.790527 |
| H | -5.378825 | -0.986837 | -0.091858 |
| H | -5.258089 | 0.451923  | 0.953699  |
| C | -2.960047 | -1.975952 | -1.431489 |
| H | -3.172553 | -1.374424 | -2.323657 |
| H | -2.108582 | -2.624131 | -1.654195 |
| H | -3.837290 | -2.602160 | -1.237318 |
| C | -0.619933 | 0.459411  | 2.421693  |
| H | -0.632222 | -0.197955 | 3.298135  |
| H | 0.386110  | 0.438343  | 1.997327  |
| H | -0.860955 | 1.470025  | 2.759817  |
| H | 5.455880  | 0.301711  | 0.822618  |
| C | -0.662701 | 2.087355  | -1.532930 |
| C | 0.431877  | 1.022817  | -1.658306 |
| N | 1.101652  | 1.064307  | -0.362338 |
| C | 1.194410  | 2.467392  | -0.012884 |
| C | -0.189228 | 3.003226  | -0.383107 |
| H | -0.792652 | 2.629584  | -2.473402 |
| H | 1.143758  | 1.285373  | -2.459902 |
| H | 1.431667  | 2.584229  | 1.049378  |
| H | -0.865605 | 2.911499  | 0.470481  |
| H | 1.977921  | 2.988899  | -0.594158 |
| H | -0.150110 | 4.057987  | -0.667277 |
| H | -1.619926 | 1.624529  | -1.279939 |
| H | 0.040625  | 0.029584  | -1.877948 |
| H | 3.029758  | -3.076354 | -0.279029 |

42

4pzMePyrlB-ts-B-m ; E = -895.029462007 Hartree

|   |           |           |           |
|---|-----------|-----------|-----------|
| C | -1.808410 | -2.636613 | -0.333061 |
| C | -3.027375 | -2.930182 | 0.262191  |
| C | -1.384351 | -1.293823 | -0.454228 |
| H | -3.317580 | -3.971875 | 0.367414  |
| C | -3.868655 | -1.919947 | 0.713073  |
| C | -2.248227 | -0.248348 | -0.003167 |
| C | -3.470393 | -0.590452 | 0.560772  |
| H | -4.121800 | 0.204485  | 0.910237  |
| N | -0.196089 | -0.996430 | -0.956780 |
| N | 0.928953  | -0.810916 | -1.416212 |
| C | 1.954938  | -0.512775 | -0.519236 |
| C | 1.926699  | -0.243941 | 0.855246  |
| C | 3.312115  | -0.386895 | -0.913144 |
| N | 4.064511  | -0.076599 | 0.128174  |
| N | 3.207094  | 0.005690  | 1.179583  |
| C | 3.737452  | 0.374302  | 2.470181  |
| H | 4.821056  | 0.399461  | 2.367214  |
| H | 3.380545  | 1.362081  | 2.776920  |
| H | 3.460249  | -0.361499 | 3.229238  |
| C | 0.787963  | -0.168377 | 1.802911  |
| H | -0.008389 | 0.440391  | 1.357511  |
| H | 0.360882  | -1.159144 | 1.988668  |
| H | 1.086905  | 0.265973  | 2.759660  |
| C | 3.892606  | -0.578093 | -2.269012 |
| H | 4.940889  | -0.274338 | -2.268351 |
| H | 3.831665  | -1.626062 | -2.578626 |
| H | 3.345977  | 0.009187  | -3.011799 |
| H | -4.822747 | -2.153418 | 1.172878  |
| C | -1.080932 | 3.063197  | -1.123443 |
| C | -1.577085 | 1.648664  | -1.428808 |
| N | -1.761880 | 1.073227  | -0.095427 |
| C | -2.434530 | 2.114568  | 0.659103  |
| C | -1.652885 | 3.375533  | 0.279567  |
| H | 0.012005  | 3.085382  | -1.106293 |
| H | -0.875272 | 1.062159  | -2.024243 |
| H | -3.491968 | 2.224051  | 0.355014  |
| H | -2.294218 | 4.260660  | 0.286928  |
| H | -2.416906 | 1.885523  | 1.729304  |
| H | -0.843672 | 3.551286  | 0.993625  |
| H | -1.412671 | 3.776132  | -1.882439 |
| H | -2.538644 | 1.676902  | -1.970771 |
| H | -1.148008 | -3.423039 | -0.681130 |

42

4pzMePyr1B-ts-B-n ; E = -895.029972383 Hartree

|   |           |           |           |
|---|-----------|-----------|-----------|
| C | -2.071177 | -2.557382 | -0.557601 |
| C | -3.318233 | -2.807510 | -0.002578 |
| C | -1.510990 | -1.260390 | -0.515690 |
| H | -3.701640 | -3.823588 | 0.003282  |
| C | -4.072087 | -1.764985 | 0.521232  |
| C | -2.297909 | -0.175373 | -0.012667 |
| C | -3.565952 | -0.464598 | 0.488843  |
| H | -4.165785 | 0.341828  | 0.895864  |
| N | -0.256802 | -1.073078 | -0.908766 |
| N | 0.921952  | -0.957628 | -1.246410 |
| C | 1.847293  | -0.586411 | -0.264028 |
| C | 3.185141  | -0.374577 | -0.591573 |
| C | 1.754226  | -0.369101 | 1.143562  |
| N | 2.942744  | -0.045593 | 1.625090  |

|   |           |           |           |
|---|-----------|-----------|-----------|
| N | 3.790106  | -0.049505 | 0.564195  |
| C | 5.184213  | 0.244499  | 0.774856  |
| H | 5.804316  | -0.644096 | 0.618504  |
| H | 5.519469  | 1.036442  | 0.099141  |
| H | 5.287659  | 0.578644  | 1.806153  |
| C | 3.868357  | -0.465936 | -1.904526 |
| H | 4.680527  | -1.200964 | -1.887210 |
| H | 3.137118  | -0.771230 | -2.654861 |
| H | 4.297071  | 0.496377  | -2.206062 |
| C | 0.567884  | -0.467231 | 2.035358  |
| H | -0.216919 | 0.223298  | 1.711509  |
| H | 0.136203  | -1.472413 | 2.007979  |
| H | 0.865172  | -0.236115 | 3.060210  |
| H | -5.054163 | -1.948341 | 0.944515  |
| C | -1.326814 | 3.146552  | -1.130820 |
| C | -0.999719 | 1.652324  | -1.130365 |
| N | -1.753218 | 1.110313  | 0.011627  |
| C | -2.488781 | 2.174353  | 0.674443  |
| C | -1.689620 | 3.419603  | 0.326558  |
| H | -0.496228 | 3.754344  | -1.499263 |
| H | 0.076833  | 1.497166  | -0.994300 |
| H | -3.517233 | 2.274206  | 0.284292  |
| H | -2.260447 | 4.340525  | 0.470052  |
| H | -2.559673 | 1.979253  | 1.750663  |
| H | -0.786369 | 3.472399  | 0.944610  |
| H | -2.196081 | 3.344307  | -1.768121 |
| H | -1.290921 | 1.161268  | -2.066117 |
| H | -1.467380 | -3.357887 | -0.971036 |

42

4pzMePyr1B-ts-H-m ; E = -895.028319125 Hartree

|   |           |           |           |
|---|-----------|-----------|-----------|
| C | 2.383951  | 0.714440  | -0.199558 |
| C | 3.052384  | 1.959813  | -0.240304 |
| C | 0.980429  | 0.732522  | -0.432631 |
| H | 4.117938  | 1.998435  | -0.049375 |
| C | 2.381564  | 3.142210  | -0.506415 |
| C | 0.331351  | 1.939755  | -0.704327 |
| C | 1.007796  | 3.147234  | -0.745821 |
| H | 0.486340  | 4.068607  | -0.984668 |
| N | 0.286863  | -0.511674 | -0.543930 |
| N | -0.947709 | -0.477303 | -0.390997 |
| C | -2.250018 | -0.466082 | -0.213961 |
| C | -3.028523 | 0.434183  | 0.559142  |
| C | -3.215801 | -1.404245 | -0.732009 |
| N | -4.432883 | -1.099999 | -0.332613 |
| N | -4.290865 | -0.010931 | 0.474051  |
| C | -5.449103 | 0.494641  | 1.163706  |
| H | -5.601667 | 1.556145  | 0.947089  |
| H | -6.305961 | -0.074547 | 0.805474  |
| H | -5.351079 | 0.363225  | 2.246288  |
| C | -2.601614 | 1.570820  | 1.405678  |
| H | -2.641624 | 1.324508  | 2.473741  |
| H | -1.567081 | 1.827349  | 1.164094  |
| H | -3.231654 | 2.452684  | 1.247050  |
| C | -2.930415 | -2.535590 | -1.649131 |
| H | -1.982264 | -3.005440 | -1.371527 |
| H | -3.734477 | -3.272869 | -1.610045 |
| H | -2.829410 | -2.192625 | -2.684742 |
| H | 2.944449  | 4.071144  | -0.533055 |

|   |           |           |           |
|---|-----------|-----------|-----------|
| C | 3.721235  | -2.406454 | 1.154612  |
| C | 2.546712  | -1.717848 | 0.466028  |
| N | 3.096473  | -0.423570 | 0.066276  |
| C | 4.543606  | -0.390070 | 0.204098  |
| C | 4.925366  | -1.851890 | 0.400525  |
| H | 3.769919  | -2.107338 | 2.208120  |
| H | 2.196068  | -2.283882 | -0.403600 |
| H | 5.013174  | 0.053370  | -0.682518 |
| H | 5.871985  | -1.966732 | 0.934540  |
| H | 1.682930  | -1.584052 | 1.122887  |
| H | 3.645022  | -3.496104 | 1.115834  |
| H | 5.021235  | -2.346931 | -0.572227 |
| H | 4.848402  | 0.213424  | 1.075382  |
| H | -0.728916 | 1.885331  | -0.936057 |

42

4pzMePyr1B-ts-H-n ; E = -895.028306661 Hartree

|   |           |           |           |
|---|-----------|-----------|-----------|
| C | 2.448784  | 0.627282  | -0.241023 |
| C | 3.217625  | 1.811200  | -0.313991 |
| C | 1.039985  | 0.768047  | -0.380000 |
| H | 4.293069  | 1.756003  | -0.196890 |
| C | 2.633803  | 3.050756  | -0.518964 |
| C | 0.479389  | 2.030192  | -0.590962 |
| C | 1.252495  | 3.176405  | -0.662385 |
| H | 0.796568  | 4.142989  | -0.851083 |
| N | 0.237652  | -0.410678 | -0.462986 |
| N | -0.977749 | -0.271585 | -0.232876 |
| C | -2.258185 | -0.166003 | 0.043539  |
| C | -3.296509 | -0.987770 | -0.459817 |
| C | -2.942872 | 0.774066  | 0.901582  |
| N | -4.240905 | 0.543893  | 0.905275  |
| N | -4.434989 | -0.495655 | 0.047839  |
| C | -5.783080 | -0.897586 | -0.257803 |
| H | -5.888098 | -1.983352 | -0.183183 |
| H | -6.434057 | -0.418184 | 0.472391  |
| H | -6.072539 | -0.579930 | -1.265206 |
| C | -3.198979 | -2.114286 | -1.412972 |
| H | -3.588288 | -1.858941 | -2.405803 |
| H | -2.142763 | -2.374830 | -1.520323 |
| H | -3.746057 | -2.994274 | -1.057929 |
| C | -2.327432 | 1.803980  | 1.776716  |
| H | -1.924242 | 1.352580  | 2.690089  |
| H | -1.489482 | 2.292451  | 1.270851  |
| H | -3.070969 | 2.549303  | 2.065636  |
| H | 3.271046  | 3.929050  | -0.573783 |
| C | 3.594582  | -2.603593 | 1.021986  |
| C | 2.443114  | -1.814437 | 0.405829  |
| N | 3.076014  | -0.572532 | -0.034424 |
| C | 4.526169  | -0.662526 | 0.018573  |
| C | 4.792957  | -2.152214 | 0.193493  |
| H | 3.733958  | -2.312587 | 2.069611  |
| H | 1.990543  | -2.347633 | -0.437187 |
| H | 4.979381  | -0.256354 | -0.894025 |
| H | 5.757361  | -2.349425 | 0.668349  |
| H | 1.637774  | -1.606596 | 1.115765  |
| H | 3.422971  | -3.682656 | 0.991033  |
| H | 4.785843  | -2.650510 | -0.782340 |
| H | 4.931558  | -0.091348 | 0.870487  |
| H | -0.594805 | 2.069081  | -0.749075 |

54

4pzMePyr2-ts-B-m ; E = -1106.20170178 Hartree

|   |           |           |           |
|---|-----------|-----------|-----------|
| C | -2.541255 | 0.693174  | 0.307505  |
| C | -3.082953 | 1.851553  | 0.895004  |
| C | -1.129607 | 0.683928  | -0.020771 |
| H | -4.115646 | 1.866259  | 1.222750  |
| C | -2.308835 | 2.994410  | 1.018634  |
| C | -0.405630 | 1.934680  | -0.006144 |
| C | -0.997350 | 3.069483  | 0.552328  |
| H | -0.455024 | 4.005322  | 0.616676  |
| N | -0.501182 | -0.460791 | -0.188031 |
| N | 0.077637  | -1.570072 | -0.239949 |
| C | 1.437798  | -1.593687 | 0.138229  |
| C | 2.146160  | -0.852597 | 1.085245  |
| C | 2.358818  | -2.556516 | -0.349712 |
| N | 3.546728  | -2.406201 | 0.219008  |
| N | 3.396857  | -1.378448 | 1.082180  |
| C | 4.491146  | -1.021134 | 1.944874  |
| H | 5.373627  | -1.541924 | 1.575328  |
| H | 4.667991  | 0.058307  | 1.920775  |
| H | 4.302113  | -1.324093 | 2.980894  |
| C | 1.733277  | 0.196221  | 2.054694  |
| H | 2.311820  | 1.118602  | 1.930972  |
| H | 0.682616  | 0.446066  | 1.915165  |
| H | 1.874364  | -0.145709 | 3.087487  |
| C | 2.109477  | -3.590598 | -1.390377 |
| H | 2.060298  | -3.146932 | -2.391039 |
| H | 2.910580  | -4.332527 | -1.383068 |
| H | 1.150689  | -4.085220 | -1.211698 |
| H | -2.757574 | 3.882026  | 1.457001  |
| C | 2.373260  | 1.988376  | -2.334677 |
| C | 1.248779  | 1.165668  | -1.705147 |
| N | 0.864366  | 1.945107  | -0.517531 |
| C | 1.721762  | 3.105638  | -0.355698 |
| C | 2.969927  | 2.725256  | -1.138126 |
| H | 3.094998  | 1.361905  | -2.864531 |
| H | 1.604709  | 0.170504  | -1.428302 |
| H | 1.265178  | 4.013955  | -0.783651 |
| H | 3.576347  | 3.592002  | -1.412559 |
| C | -4.336544 | -2.162687 | -1.040434 |
| C | -2.985031 | -1.479828 | -0.828517 |
| N | -3.287223 | -0.430770 | 0.153307  |
| C | -4.645414 | -0.529130 | 0.654551  |
| C | -5.050059 | -1.952255 | 0.292461  |
| H | -4.893720 | -1.661950 | -1.840779 |
| H | -2.226767 | -2.172374 | -0.451920 |
| H | -4.675586 | -0.334160 | 1.732739  |
| H | -6.134223 | -2.077404 | 0.234433  |
| H | -2.590309 | -1.040273 | -1.750782 |
| H | -4.228954 | -3.215100 | -1.314571 |
| H | -4.664518 | -2.650621 | 1.043386  |
| H | -5.311164 | 0.202420  | 0.165658  |
| H | 1.908676  | 3.298830  | 0.707506  |
| H | 3.589946  | 2.042646  | -0.545377 |
| H | 1.966313  | 2.713888  | -3.048394 |
| H | 0.386578  | 1.044047  | -2.370531 |

54

4pzMePyr2-ts-B-n ; E = -1106.20126235 Hartree

|   |           |           |           |
|---|-----------|-----------|-----------|
| C | -2.616508 | 0.413022  | 0.277167  |
| C | -3.351051 | 1.448939  | 0.879973  |
| C | -1.208969 | 0.629694  | 0.006697  |
| H | -4.382203 | 1.289215  | 1.171750  |
| C | -2.772891 | 2.695939  | 1.058740  |
| C | -0.691628 | 1.976474  | 0.077154  |
| C | -1.478885 | 2.987547  | 0.634847  |
| H | -1.093141 | 3.994438  | 0.739003  |
| N | -0.426741 | -0.412916 | -0.185258 |
| N | 0.305216  | -1.424709 | -0.252493 |
| C | 1.614837  | -1.308243 | 0.262810  |
| C | 2.654465  | -2.123211 | -0.169466 |
| C | 2.148197  | -0.566059 | 1.356035  |
| N | 3.421329  | -0.889346 | 1.552000  |
| N | 3.711675  | -1.819867 | 0.617374  |
| C | 5.050228  | -2.338593 | 0.528955  |
| H | 5.040381  | -3.431867 | 0.495738  |
| H | 5.569346  | -1.962598 | -0.359720 |
| H | 5.581405  | -2.008804 | 1.421025  |
| C | 2.674782  | -3.122006 | -1.266515 |
| H | 3.064336  | -4.089668 | -0.931252 |
| H | 1.650083  | -3.262513 | -1.617109 |
| H | 3.286593  | -2.794728 | -2.115581 |
| C | 1.454658  | 0.365265  | 2.289302  |
| H | 1.150517  | 1.288154  | 1.791240  |
| H | 0.546769  | -0.095748 | 2.690858  |
| H | 2.122599  | 0.606068  | 3.119186  |
| H | -3.367293 | 3.488725  | 1.505138  |
| C | 2.123393  | 2.502423  | -2.146742 |
| C | 1.169350  | 1.488063  | -1.517670 |
| N | 0.569326  | 2.221600  | -0.396515 |
| C | 1.190819  | 3.524116  | -0.226504 |
| C | 2.516363  | 3.377955  | -0.959719 |
| H | 2.974736  | 2.021664  | -2.635353 |
| H | 1.715011  | 0.606239  | -1.170929 |
| H | 0.583014  | 4.322855  | -0.683497 |
| H | 2.945612  | 4.341221  | -1.246401 |
| C | -3.945607 | -2.594170 | -1.265104 |
| C | -2.713457 | -1.732294 | -0.984280 |
| N | -3.174328 | -0.810363 | 0.062023  |
| C | -4.517810 | -1.126381 | 0.507674  |
| C | -4.702979 | -2.569923 | 0.059935  |
| H | -4.559596 | -2.134895 | -2.048583 |
| H | -1.862707 | -2.328323 | -0.642192 |
| H | -4.606274 | -0.996290 | 1.592360  |
| H | -5.755748 | -2.849043 | -0.031518 |
| H | -2.384915 | -1.176963 | -1.869893 |
| H | -3.679291 | -3.601324 | -1.595802 |
| H | -4.230151 | -3.246211 | 0.780583  |
| H | -5.269993 | -0.473079 | 0.032171  |
| H | 1.305538  | 3.761045  | 0.837876  |
| H | 3.237803  | 2.852614  | -0.324027 |
| H | 1.599858  | 3.107127  | -2.896282 |
| H | 0.388535  | 1.150546  | -2.208449 |

54

4pzMePyr2-ts-H-m ; E = -1106.19254424 Hartree

|   |          |          |          |
|---|----------|----------|----------|
| C | 2.596031 | 0.562717 | 0.361256 |
| C | 3.034277 | 1.703548 | 1.071698 |

|   |           |           |           |
|---|-----------|-----------|-----------|
| C | 1.227096  | 0.521539  | -0.035561 |
| H | 4.037545  | 1.736767  | 1.475144  |
| C | 2.177428  | 2.760555  | 1.316463  |
| C | 0.412488  | 1.684558  | 0.081588  |
| C | 0.883309  | 2.782558  | 0.815839  |
| H | 0.267091  | 3.661412  | 0.955426  |
| N | 0.722931  | -0.734895 | -0.494372 |
| N | -0.440700 | -1.007378 | -0.132124 |
| C | -1.682211 | -1.322059 | 0.146465  |
| C | -2.519651 | -0.729420 | 1.127488  |
| C | -2.521778 | -2.322304 | -0.468503 |
| N | -3.723871 | -2.327222 | 0.067190  |
| N | -3.690225 | -1.377447 | 1.047936  |
| C | -4.837506 | -1.232163 | 1.904940  |
| H | -5.112396 | -0.178727 | 2.006469  |
| H | -5.657052 | -1.779259 | 1.440156  |
| H | -4.644556 | -1.646541 | 2.900367  |
| C | -2.201179 | 0.307061  | 2.133586  |
| H | -2.187773 | -0.099810 | 3.151863  |
| H | -1.211769 | 0.712706  | 1.911364  |
| H | -2.930519 | 1.125076  | 2.115873  |
| C | -2.147257 | -3.201249 | -1.604526 |
| H | -1.127552 | -3.572953 | -1.467791 |
| H | -2.839057 | -4.041784 | -1.684823 |
| H | -2.163013 | -2.650941 | -2.552293 |
| H | 2.541134  | 3.611610  | 1.885939  |
| C | -2.067494 | 2.110293  | -2.523149 |
| C | -1.037338 | 1.182448  | -1.880754 |
| N | -0.824399 | 1.746068  | -0.543115 |
| C | -1.684614 | 2.897776  | -0.337006 |
| C | -2.822274 | 2.660974  | -1.316682 |
| H | -1.568973 | 2.931544  | -3.050853 |
| H | -0.091257 | 1.138821  | -2.432695 |
| H | -2.008232 | 2.958435  | 0.708839  |
| H | -3.508453 | 1.904063  | -0.919587 |
| C | 4.552234  | -2.510387 | -0.238651 |
| C | 3.251363  | -1.751281 | -0.474603 |
| N | 3.494186  | -0.454697 | 0.153318  |
| C | 4.909784  | -0.255777 | 0.434782  |
| C | 5.602910  | -1.408500 | -0.282307 |
| H | 4.537504  | -2.976866 | 0.753235  |
| H | 3.034674  | -1.639078 | -1.545613 |
| H | 5.249494  | 0.719638  | 0.065957  |
| H | 6.551210  | -1.681725 | 0.187748  |
| H | 2.383461  | -2.243140 | -0.035358 |
| H | 4.712481  | -3.298226 | -0.979275 |
| H | 5.809127  | -1.128361 | -1.321467 |
| H | 5.108432  | -0.283678 | 1.518310  |
| H | -1.173096 | 3.845076  | -0.581329 |
| H | -3.391205 | 3.569493  | -1.530105 |
| H | -2.706219 | 1.587566  | -3.239742 |
| H | -1.430191 | 0.162549  | -1.821763 |

54

4pzMePyr2-ts-H-n ; E = -1106.19088792 Hartree

|   |          |          |           |
|---|----------|----------|-----------|
| C | 2.741646 | 0.541301 | 0.037642  |
| C | 3.370589 | 1.760343 | 0.374619  |
| C | 1.327021 | 0.544729 | -0.124761 |
| H | 4.437053 | 1.786849 | 0.555594  |

|   |           |           |           |
|---|-----------|-----------|-----------|
| C | 2.636006  | 2.921458  | 0.520582  |
| C | 0.601556  | 1.766766  | -0.060753 |
| C | 1.265664  | 2.944166  | 0.295123  |
| H | 0.724106  | 3.880291  | 0.351340  |
| N | 0.719100  | -0.713374 | -0.420978 |
| N | -0.421481 | -0.894666 | 0.050945  |
| C | -1.664813 | -1.103915 | 0.399101  |
| C | -2.610407 | -1.946892 | -0.236966 |
| C | -2.418340 | -0.463697 | 1.451439  |
| N | -3.673283 | -0.867840 | 1.443540  |
| N | -3.774252 | -1.732121 | 0.392827  |
| C | -5.075674 | -2.232931 | 0.036624  |
| H | -5.030100 | -3.304205 | -0.175753 |
| H | -5.732574 | -2.057870 | 0.888019  |
| H | -5.475449 | -1.712200 | -0.840541 |
| C | -2.422930 | -2.810044 | -1.423447 |
| H | -2.907838 | -2.402229 | -2.318920 |
| H | -1.350591 | -2.883310 | -1.622748 |
| H | -2.819961 | -3.817938 | -1.261510 |
| C | -1.871853 | 0.451548  | 2.483874  |
| H | -1.558967 | -0.099926 | 3.377510  |
| H | -0.994317 | 0.962028  | 2.078939  |
| H | -2.621975 | 1.184614  | 2.790270  |
| H | 3.148163  | 3.840018  | 0.793820  |
| C | -2.709300 | 1.610865  | -1.695654 |
| C | -1.192489 | 1.380067  | -1.709602 |
| N | -0.763359 | 1.799981  | -0.378595 |
| C | -1.541313 | 2.984986  | -0.079413 |
| C | -2.947302 | 2.581992  | -0.519540 |
| H | -3.049210 | 2.022784  | -2.649969 |
| H | -0.710063 | 2.008926  | -2.478123 |
| H | -1.473063 | 3.231880  | 0.984603  |
| H | -3.457314 | 2.063133  | 0.296102  |
| C | 4.359512  | -2.751102 | 0.274199  |
| C | 3.085924  | -1.980451 | -0.062446 |
| N | 3.522102  | -0.583876 | -0.081365 |
| C | 4.972820  | -0.482683 | -0.038209 |
| C | 5.449631  | -1.893073 | -0.356558 |
| H | 4.499856  | -2.793354 | 1.360627  |
| H | 2.677060  | -2.281202 | -1.033137 |
| H | 5.335485  | 0.258906  | -0.760135 |
| H | 6.451049  | -2.092289 | 0.033584  |
| H | 2.293405  | -2.131612 | 0.673820  |
| H | 4.334804  | -3.776877 | -0.102946 |
| H | 5.469862  | -2.045375 | -1.441551 |
| H | 5.326116  | -0.171287 | 0.959346  |
| H | -1.200019 | 3.866567  | -0.655059 |
| H | -3.551051 | 3.449817  | -0.798266 |
| H | -3.244098 | 0.671770  | -1.531252 |
| H | -0.917844 | 0.344764  | -1.913406 |



## References

1. Calbo, J.; Weston, C. E.; White, A. J. P.; Rzepa, H. S.; Contreras-García, J.; Fuchter, M. J. *J. Am. Chem. Soc.* **2017**, *139*, 1261–1274. doi:10.1021/jacs.6b11626.
2. Stricker, L.; Fritz, E.-C.; Peterlechner, M.; Doltsinis, N. L.; Ravoo, B. J. *J. Am. Chem. Soc.* **2016**, *138*, 4547–4554. doi:10.1021/jacs.6b00484.
3. Devi, S.; Saraswat, M.; Grewal, S.; Venkataramani, S. *J. Org. Chem.* **2018**, *83*, 4307–4322. doi:10.1021/acs.joc.7b02604.
4. SHELXTL v5.1, Bruker AXS, Madison, WI, 1998.
5. Sheldrick, G. M.; *IUCr. Acta Crystallogr. Sect. C Struct. Chem.* **2015**, *71*, 3–8. doi:10.1107/S2053229614024218.
